# Supplementary material
Source: publisher figshare collection journal article supplement (https://acs.figshare.com/ndownloader/files/9533482)
Supplement: Supplementary file 1 [file 9533482]

 
data_shelx
 
_audit_creation_method            'SHELXL-2014/7'
_shelx_SHELXL_version_number      '2014/7'
_chemical_name_systematic         SVK3_36
_chemical_name_common             HJ2035
_chemical_melting_point           ?
_chemical_formula_moiety          'C29 H26 F18 Mo N2 O5'
_chemical_formula_sum
 'C29 H26 F18 Mo N2 O5'
_chemical_formula_weight          920.46
 
loop_
 _atom_type_symbol
 _atom_type_description
 _atom_type_scat_dispersion_real
 _atom_type_scat_dispersion_imag
 _atom_type_scat_source
 'C'  'C'   0.0033   0.0016
 'International Tables Vol C Tables 4.2.6.8 and 6.1.1.4'
 'H'  'H'   0.0000   0.0000
 'International Tables Vol C Tables 4.2.6.8 and 6.1.1.4'
 'N'  'N'   0.0061   0.0033
 'International Tables Vol C Tables 4.2.6.8 and 6.1.1.4'
 'O'  'O'   0.0106   0.0060
 'International Tables Vol C Tables 4.2.6.8 and 6.1.1.4'
 'F'  'F'   0.0171   0.0103
 'International Tables Vol C Tables 4.2.6.8 and 6.1.1.4'
 'Mo'  'Mo'  -1.6832   0.6857
 'International Tables Vol C Tables 4.2.6.8 and 6.1.1.4'
 
_space_group_crystal_system       triclinic
_space_group_IT_number            2
_space_group_name_H-M_alt         'P -1'
_space_group_name_Hall            '-P 1'
 
_shelx_space_group_comment
;
The symmetry employed for this shelxl refinement is uniquely defined
by the following loop, which should always be used as a source of
symmetry information in preference to the above space-group names.
They are only intended as comments.
;
 
loop_
 _space_group_symop_operation_xyz
 'x, y, z'
 '-x, -y, -z'
 
_cell_length_a                    10.0185(3)
_cell_length_b                    10.8539(3)
_cell_length_c                    17.1855(5)
_cell_angle_alpha                 77.653(2)
_cell_angle_beta                  80.752(2)
_cell_angle_gamma                 84.727(2)
_cell_volume                      1798.59(9)
_cell_formula_units_Z             2
_cell_measurement_temperature     100(2)
_cell_measurement_reflns_used     9872
_cell_measurement_theta_min       2.24
_cell_measurement_theta_max       25.36
 
_exptl_crystal_description        plate
_exptl_crystal_colour             orange
_exptl_crystal_density_meas       ?
_exptl_crystal_density_method     ?
_exptl_crystal_density_diffrn     1.700
_exptl_crystal_F_000              916
_exptl_transmission_factor_min    ?
_exptl_transmission_factor_max    ?
_exptl_crystal_size_max           0.360
_exptl_crystal_size_mid           0.080
_exptl_crystal_size_min           0.040
_exptl_absorpt_coefficient_mu     0.498
_shelx_estimated_absorpt_T_min    0.841
_shelx_estimated_absorpt_T_max    0.980
_exptl_absorpt_correction_type    multi-scan
_exptl_absorpt_correction_T_min   0.6781
_exptl_absorpt_correction_T_max   0.7452
_exptl_absorpt_process_details    SADABS
_exptl_absorpt_special_details    ?
_diffrn_ambient_temperature       100(2)
_diffrn_radiation_wavelength      0.71073
_diffrn_radiation_type            MoK\a
_diffrn_source                    'microfocus sealed tube'
_diffrn_measurement_device_type   'Bruker APEX-II CCD'
_diffrn_measurement_method        'phi and omega scans'
_diffrn_detector_area_resol_mean  8.366
_diffrn_reflns_number             31388
_diffrn_reflns_av_unetI/netI      0.0407
_diffrn_reflns_av_R_equivalents   0.0421
_diffrn_reflns_limit_h_min        -12
_diffrn_reflns_limit_h_max        12
_diffrn_reflns_limit_k_min        -11
_diffrn_reflns_limit_k_max        13
_diffrn_reflns_limit_l_min        -20
_diffrn_reflns_limit_l_max        20
_diffrn_reflns_theta_min          1.226
_diffrn_reflns_theta_max          25.393
_diffrn_reflns_theta_full         25.000
_diffrn_measured_fraction_theta_max   0.985
_diffrn_measured_fraction_theta_full  0.988
_diffrn_reflns_Laue_measured_fraction_max    0.985
_diffrn_reflns_Laue_measured_fraction_full   0.988
_diffrn_reflns_point_group_measured_fraction_max   0.985
_diffrn_reflns_point_group_measured_fraction_full  0.988
_reflns_number_total              6499
_reflns_number_gt                 5518
_reflns_threshold_expression      'I > 2\s(I)'
_reflns_Friedel_coverage          0.000
_reflns_Friedel_fraction_max      .
_reflns_Friedel_fraction_full     .
 
_reflns_special_details
;
 Reflections were merged by SHELXL according to the crystal
 class for the calculation of statistics and refinement.
 
 Structure factors included contributions from the .fab file.
 
 _reflns_Friedel_fraction is defined as the number of unique
 Friedel pairs measured divided by the number that would be
 possible theoretically, ignoring centric projections and
 systematic absences.
;
 
_computing_data_collection        'Bruker APEX3 v.2016.5'
_computing_cell_refinement        'Bruker SAINT'
_computing_data_reduction         'Bruker SAINT'
_computing_structure_solution     'SHELXT'
_computing_structure_refinement 'SHELXL-2014/7 (Sheldrick, 2014)'
_computing_molecular_graphics     ORTEP-32
_computing_publication_material   WinGX
_refine_special_details           
;
The structure also contains disordered solvent in a void centered on one inversion center, likely pentane with partial occupancy. Attempts to develop an atomistic model of these solvent molecules led to poor refinement. Thus, we employed Squeeze (in PLATON V-100616) to treat electron density in the voids as a diffuse solvent contribution to the calculated structure factors.

Total Potential Solvent Accessible Void Vol = 178.0 Ang^3
Electron Count / Cell = 37

;

_refine_ls_structure_factor_coef  Fsqd
_refine_ls_matrix_type            full
_refine_ls_weighting_scheme       calc
_refine_ls_weighting_details
'w=1/[\s^2^(Fo^2^)+(0.0401P)^2^+1.4501P] where P=(Fo^2^+2Fc^2^)/3'
_atom_sites_solution_primary      iterative
_atom_sites_solution_secondary    difmap
_atom_sites_solution_hydrogens    geom
_refine_ls_hydrogen_treatment     constr
_refine_ls_extinction_method      none
_refine_ls_extinction_coef        .
_refine_ls_number_reflns          6499
_refine_ls_number_parameters      497
_refine_ls_number_restraints      0
_refine_ls_R_factor_all           0.0462
_refine_ls_R_factor_gt            0.0367
_refine_ls_wR_factor_ref          0.0876
_refine_ls_wR_factor_gt           0.0838
_refine_ls_goodness_of_fit_ref    1.067
_refine_ls_restrained_S_all       1.067
_refine_ls_shift/su_max           0.001
_refine_ls_shift/su_mean          0.000
 
loop_
 _atom_site_label
 _atom_site_type_symbol
 _atom_site_fract_x
 _atom_site_fract_y
 _atom_site_fract_z
 _atom_site_U_iso_or_equiv
 _atom_site_adp_type
 _atom_site_occupancy
 _atom_site_site_symmetry_order
 _atom_site_calc_flag
 _atom_site_refinement_flags_posn
 _atom_site_refinement_flags_adp
 _atom_site_refinement_flags_occupancy
 _atom_site_disorder_assembly
 _atom_site_disorder_group
C1 C 0.2367(3) 0.5706(3) 0.85492(17) 0.0202(7) Uani 1 1 d . . . . .
C2 C 0.2873(3) 0.5972(3) 0.92872(19) 0.0288(8) Uani 1 1 d . . . . .
H2A H 0.2128 0.5910 0.9737 0.043 Uiso 1 1 calc R U . . .
H2B H 0.3611 0.5352 0.9437 0.043 Uiso 1 1 calc R U . . .
H2C H 0.3205 0.6824 0.9161 0.043 Uiso 1 1 calc R U . . .
C3 C 0.1880(3) 0.4364(3) 0.87390(19) 0.0263(7) Uani 1 1 d . . . . .
C4 C 0.1192(3) 0.6663(3) 0.83299(19) 0.0286(8) Uani 1 1 d . . . . .
C5 C 0.6958(3) 0.3775(3) 0.79550(17) 0.0187(6) Uani 1 1 d . . . . .
C6 C 0.8161(3) 0.4397(3) 0.81251(19) 0.0232(7) Uani 1 1 d . . . . .
H6A H 0.8771 0.3747 0.8398 0.035 Uiso 1 1 calc R U . . .
H6B H 0.8652 0.4837 0.7616 0.035 Uiso 1 1 calc R U . . .
H6C H 0.7832 0.5005 0.8470 0.035 Uiso 1 1 calc R U . . .
C7 C 0.6243(3) 0.3032(3) 0.87551(18) 0.0205(6) Uani 1 1 d . . . . .
C8 C 0.7501(3) 0.2846(3) 0.74000(18) 0.0220(7) Uani 1 1 d . . . . .
C9 C 0.7573(3) 0.7609(3) 0.60793(17) 0.0197(6) Uani 1 1 d . . . . .
C10 C 0.6695(3) 0.8057(3) 0.54038(18) 0.0256(7) Uani 1 1 d . . . . .
H10A H 0.7263 0.8448 0.4910 0.038 Uiso 1 1 calc R U . . .
H10B H 0.6277 0.7331 0.5308 0.038 Uiso 1 1 calc R U . . .
H10C H 0.5985 0.8675 0.5564 0.038 Uiso 1 1 calc R U . . .
C11 C 0.8207(3) 0.8763(3) 0.62233(19) 0.0250(7) Uani 1 1 d . . . . .
C12 C 0.8699(3) 0.6667(3) 0.57912(19) 0.0257(7) Uani 1 1 d . . . . .
C13 C 0.4718(3) 0.8142(3) 0.76131(17) 0.0173(6) Uani 1 1 d . . . . .
C14 C 0.3961(3) 0.8777(3) 0.70294(16) 0.0168(6) Uani 1 1 d . . . . .
C15 C 0.4032(3) 0.7741(3) 0.66656(16) 0.0167(6) Uani 1 1 d . . . . .
C16 C 0.3276(3) 1.0054(3) 0.68714(17) 0.0188(6) Uani 1 1 d . . . . .
C17 C 0.3960(3) 1.1117(3) 0.68595(17) 0.0216(7) Uani 1 1 d . . . . .
H17 H 0.4893 1.1024 0.6919 0.026 Uiso 1 1 calc R U . . .
C18 C 0.3302(3) 1.2314(3) 0.67621(19) 0.0281(7) Uani 1 1 d . . . . .
H18 H 0.3780 1.3032 0.6759 0.034 Uiso 1 1 calc R U . . .
C19 C 0.1947(3) 1.2451(3) 0.66700(19) 0.0303(8) Uani 1 1 d . . . . .
H19 H 0.1487 1.3263 0.6610 0.036 Uiso 1 1 calc R U . . .
C20 C 0.1262(3) 1.1403(3) 0.66649(18) 0.0268(7) Uani 1 1 d . . . . .
H20 H 0.0337 1.1504 0.6588 0.032 Uiso 1 1 calc R U . . .
C21 C 0.1906(3) 1.0215(3) 0.67694(17) 0.0221(7) Uani 1 1 d . . . . .
H21 H 0.1420 0.9502 0.6772 0.027 Uiso 1 1 calc R U . . .
C22 C 0.6023(3) 0.7434(3) 0.85949(17) 0.0176(6) Uani 1 1 d . . . . .
C23 C 0.6731(3) 0.7817(3) 0.92008(18) 0.0231(7) Uani 1 1 d . . . . .
H23A H 0.7714 0.7873 0.9011 0.028 Uiso 1 1 calc R U . . .
H23B H 0.6594 0.7217 0.9725 0.028 Uiso 1 1 calc R U . . .
C24 C 0.6041(3) 0.9116(3) 0.92628(19) 0.0307(8) Uani 1 1 d . . . . .
H24A H 0.5318 0.9045 0.9733 0.037 Uiso 1 1 calc R U . . .
H24B H 0.6708 0.9696 0.9323 0.037 Uiso 1 1 calc R U . . .
C25 C 0.5445(3) 0.9602(3) 0.84875(18) 0.0240(7) Uani 1 1 d . . . . .
H25A H 0.4556 1.0063 0.8588 0.029 Uiso 1 1 calc R U . . .
H25B H 0.6063 1.0163 0.8088 0.029 Uiso 1 1 calc R U . . .
C26 C 0.3858(3) 0.6264(3) 0.59499(17) 0.0189(6) Uani 1 1 d . . . . .
C27 C 0.3229(3) 0.5999(3) 0.52700(18) 0.0247(7) Uani 1 1 d . . . . .
H27A H 0.2427 0.5492 0.5473 0.030 Uiso 1 1 calc R U . . .
H27B H 0.3889 0.5551 0.4916 0.030 Uiso 1 1 calc R U . . .
C28 C 0.2830(3) 0.7332(3) 0.48297(18) 0.0277(7) Uani 1 1 d . . . . .
H28A H 0.1987 0.7334 0.4597 0.033 Uiso 1 1 calc R U . . .
H28B H 0.3559 0.7653 0.4391 0.033 Uiso 1 1 calc R U . . .
C29 C 0.2613(3) 0.8146(3) 0.54746(18) 0.0236(7) Uani 1 1 d . . . . .
H29A H 0.2902 0.9014 0.5248 0.028 Uiso 1 1 calc R U . . .
H29B H 0.1655 0.8186 0.5728 0.028 Uiso 1 1 calc R U . . .
N1 N 0.5303(2) 0.8423(2) 0.82142(14) 0.0171(5) Uani 1 1 d . . . . .
N2 N 0.3499(2) 0.7446(2) 0.60512(14) 0.0178(5) Uani 1 1 d . . . . .
O1 O 0.33204(18) 0.57622(19) 0.78666(11) 0.0197(4) Uani 1 1 d . . . . .
O2 O 0.60116(17) 0.45781(18) 0.75714(11) 0.0170(4) Uani 1 1 d . . . . .
O3 O 0.69259(17) 0.70364(18) 0.68153(11) 0.0169(4) Uani 1 1 d . . . . .
O4 O 0.46204(18) 0.55769(19) 0.63931(11) 0.0190(4) Uani 1 1 d . . . . .
O5 O 0.60197(18) 0.63909(18) 0.83969(11) 0.0166(4) Uani 1 1 d . . . . .
F1 F 0.28996(17) 0.35197(17) 0.88809(11) 0.0312(4) Uani 1 1 d . . . . .
F2 F 0.09286(18) 0.41462(19) 0.93863(11) 0.0378(5) Uani 1 1 d . . . . .
F3 F 0.13592(17) 0.40969(18) 0.81263(11) 0.0332(4) Uani 1 1 d . . . . .
F4 F 0.15540(17) 0.78479(18) 0.82454(12) 0.0368(5) Uani 1 1 d . . . . .
F5 F 0.08044(19) 0.6601(2) 0.76352(12) 0.0457(5) Uani 1 1 d . . . . .
F6 F 0.00911(17) 0.6532(2) 0.88865(12) 0.0440(5) Uani 1 1 d . . . . .
F7 F 0.71117(17) 0.22877(17) 0.91994(10) 0.0292(4) Uani 1 1 d . . . . .
F8 F 0.53305(16) 0.22729(16) 0.86556(10) 0.0258(4) Uani 1 1 d . . . . .
F9 F 0.55893(16) 0.38164(15) 0.92124(10) 0.0228(4) Uani 1 1 d . . . . .
F10 F 0.83361(16) 0.34018(17) 0.67605(10) 0.0291(4) Uani 1 1 d . . . . .
F11 F 0.82023(17) 0.18285(17) 0.77696(11) 0.0318(4) Uani 1 1 d . . . . .
F12 F 0.65203(16) 0.23995(17) 0.71149(10) 0.0277(4) Uani 1 1 d . . . . .
F13 F 0.81524(18) 0.56754(18) 0.56577(12) 0.0358(5) Uani 1 1 d . . . . .
F14 F 0.94656(17) 0.71693(19) 0.50998(11) 0.0354(5) Uani 1 1 d . . . . .
F15 F 0.95504(16) 0.62299(17) 0.63254(10) 0.0295(4) Uani 1 1 d . . . . .
F16 F 0.89475(17) 0.94022(18) 0.55667(12) 0.0373(5) Uani 1 1 d . . . . .
F17 F 0.72220(17) 0.95974(17) 0.64641(12) 0.0349(5) Uani 1 1 d . . . . .
F18 F 0.90040(17) 0.84788(17) 0.67930(11) 0.0320(4) Uani 1 1 d . . . . .
Mo1 Mo 0.51494(2) 0.63108(2) 0.73722(2) 0.01500(8) Uani 1 1 d . . . . .
 
loop_
 _atom_site_aniso_label
 _atom_site_aniso_U_11
 _atom_site_aniso_U_22
 _atom_site_aniso_U_33
 _atom_site_aniso_U_23
 _atom_site_aniso_U_13
 _atom_site_aniso_U_12
C1 0.0149(13) 0.0275(18) 0.0165(16) -0.0039(13) 0.0040(11) -0.0045(12)
C2 0.0255(16) 0.038(2) 0.0229(18) -0.0095(15) 0.0011(13) -0.0047(14)
C3 0.0183(14) 0.036(2) 0.0214(17) 0.0014(15) 0.0005(13) -0.0050(13)
C4 0.0216(15) 0.035(2) 0.0239(18) 0.0005(15) 0.0036(13) 0.0003(14)
C5 0.0168(13) 0.0189(16) 0.0207(16) -0.0050(13) -0.0015(12) -0.0027(12)
C6 0.0178(14) 0.0248(18) 0.0283(18) -0.0046(14) -0.0070(13) -0.0023(12)
C7 0.0205(14) 0.0197(17) 0.0224(17) -0.0066(13) -0.0044(12) -0.0003(12)
C8 0.0207(14) 0.0220(17) 0.0218(17) -0.0022(14) -0.0010(12) -0.0022(12)
C9 0.0141(13) 0.0258(18) 0.0175(16) -0.0015(13) 0.0009(11) -0.0051(12)
C10 0.0150(14) 0.038(2) 0.0208(17) 0.0017(14) 0.0004(12) -0.0069(13)
C11 0.0174(14) 0.0251(18) 0.0273(18) 0.0066(14) -0.0010(13) -0.0054(13)
C12 0.0215(15) 0.0311(19) 0.0228(18) -0.0036(15) 0.0012(13) -0.0043(13)
C13 0.0148(13) 0.0180(16) 0.0185(16) -0.0040(12) 0.0019(11) -0.0043(11)
C14 0.0163(13) 0.0195(16) 0.0135(15) -0.0022(12) 0.0017(11) -0.0047(11)
C15 0.0127(13) 0.0228(17) 0.0123(15) 0.0007(12) 0.0010(11) -0.0037(11)
C16 0.0193(14) 0.0226(17) 0.0126(15) -0.0014(13) -0.0012(11) 0.0021(12)
C17 0.0221(14) 0.0206(17) 0.0216(17) -0.0018(13) -0.0053(12) -0.0008(12)
C18 0.0407(18) 0.0199(18) 0.0241(18) -0.0040(14) -0.0051(14) -0.0040(14)
C19 0.0364(18) 0.0266(19) 0.0223(18) -0.0022(14) 0.0003(14) 0.0126(15)
C20 0.0238(15) 0.034(2) 0.0186(17) -0.0030(14) -0.0009(12) 0.0065(14)
C21 0.0196(14) 0.0283(18) 0.0156(16) -0.0010(13) 0.0016(12) -0.0016(12)
C22 0.0189(14) 0.0175(17) 0.0142(15) -0.0004(13) 0.0009(11) -0.0031(12)
C23 0.0299(16) 0.0210(17) 0.0207(17) -0.0050(13) -0.0095(13) -0.0008(13)
C24 0.0432(19) 0.0272(19) 0.0253(19) -0.0081(15) -0.0124(15) -0.0014(15)
C25 0.0312(16) 0.0170(17) 0.0262(18) -0.0075(14) -0.0084(13) 0.0003(13)
C26 0.0129(13) 0.0254(18) 0.0169(16) -0.0032(13) 0.0030(11) -0.0045(12)
C27 0.0190(14) 0.036(2) 0.0237(17) -0.0133(15) -0.0059(12) -0.0013(13)
C28 0.0221(15) 0.043(2) 0.0186(17) -0.0065(15) -0.0059(12) 0.0003(14)
C29 0.0201(14) 0.0268(18) 0.0232(17) -0.0010(14) -0.0077(12) 0.0007(12)
N1 0.0206(12) 0.0151(13) 0.0161(13) -0.0043(10) -0.0030(10) -0.0008(10)
N2 0.0134(11) 0.0255(15) 0.0145(13) -0.0036(11) -0.0016(9) -0.0025(10)
O1 0.0155(9) 0.0244(12) 0.0177(11) -0.0032(9) 0.0023(8) -0.0040(8)
O2 0.0150(9) 0.0169(11) 0.0190(11) -0.0035(9) -0.0031(8) -0.0003(8)
O3 0.0123(9) 0.0217(11) 0.0158(11) -0.0014(9) 0.0000(8) -0.0047(8)
O4 0.0159(9) 0.0242(12) 0.0176(11) -0.0070(9) -0.0003(8) -0.0025(8)
O5 0.0184(9) 0.0159(11) 0.0155(11) -0.0035(9) -0.0012(8) -0.0023(8)
F1 0.0280(9) 0.0264(11) 0.0363(11) 0.0017(8) -0.0061(8) -0.0035(8)
F2 0.0337(10) 0.0412(12) 0.0321(11) -0.0031(9) 0.0158(8) -0.0155(9)
F3 0.0272(9) 0.0395(12) 0.0366(11) -0.0090(9) -0.0079(8) -0.0124(8)
F4 0.0295(10) 0.0265(11) 0.0472(13) -0.0030(9) 0.0067(9) 0.0029(8)
F5 0.0399(11) 0.0584(15) 0.0396(13) -0.0066(11) -0.0208(10) 0.0118(10)
F6 0.0204(9) 0.0519(14) 0.0460(13) 0.0046(10) 0.0126(9) 0.0050(9)
F7 0.0326(10) 0.0274(11) 0.0234(10) 0.0022(8) -0.0055(8) 0.0052(8)
F8 0.0254(9) 0.0241(10) 0.0281(10) -0.0080(8) 0.0037(7) -0.0093(7)
F9 0.0268(9) 0.0218(10) 0.0197(9) -0.0065(7) 0.0010(7) -0.0029(7)
F10 0.0244(9) 0.0329(11) 0.0273(10) -0.0086(8) 0.0083(7) -0.0035(8)
F11 0.0325(10) 0.0266(11) 0.0342(11) -0.0076(9) -0.0047(8) 0.0121(8)
F12 0.0281(9) 0.0297(11) 0.0295(10) -0.0159(8) -0.0029(8) -0.0031(8)
F13 0.0349(10) 0.0368(12) 0.0401(12) -0.0196(9) 0.0000(9) -0.0067(9)
F14 0.0251(9) 0.0492(13) 0.0234(11) 0.0007(9) 0.0090(8) 0.0013(8)
F15 0.0222(9) 0.0375(11) 0.0261(10) -0.0035(8) -0.0033(7) 0.0053(8)
F16 0.0296(10) 0.0369(12) 0.0380(12) 0.0088(9) 0.0026(8) -0.0160(8)
F17 0.0298(10) 0.0240(11) 0.0490(13) -0.0078(9) 0.0009(9) -0.0026(8)
F18 0.0313(9) 0.0295(11) 0.0382(11) -0.0016(9) -0.0156(8) -0.0111(8)
Mo1 0.01361(12) 0.01661(15) 0.01470(14) -0.00318(10) -0.00084(9) -0.00259(9)
 
_geom_special_details
;
 All esds (except the esd in the dihedral angle between two l.s. planes)
 are estimated using the full covariance matrix.  The cell esds are taken
 into account individually in the estimation of esds in distances, angles
 and torsion angles; correlations between esds in cell parameters are only
 used when they are defined by crystal symmetry.  An approximate (isotropic)
 treatment of cell esds is used for estimating esds involving l.s. planes.
;
 
loop_
 _geom_bond_atom_site_label_1
 _geom_bond_atom_site_label_2
 _geom_bond_distance
 _geom_bond_site_symmetry_2
 _geom_bond_publ_flag
C1 O1 1.383(3) . ?
C1 C2 1.529(4) . ?
C1 C3 1.531(4) . ?
C1 C4 1.535(4) . ?
C2 H2A 0.9800 . ?
C2 H2B 0.9800 . ?
C2 H2C 0.9800 . ?
C3 F1 1.325(3) . ?
C3 F2 1.338(3) . ?
C3 F3 1.341(4) . ?
C4 F5 1.330(4) . ?
C4 F6 1.336(3) . ?
C4 F4 1.340(4) . ?
C5 O2 1.377(3) . ?
C5 C6 1.530(4) . ?
C5 C8 1.538(4) . ?
C5 C7 1.539(4) . ?
C6 H6A 0.9800 . ?
C6 H6B 0.9800 . ?
C6 H6C 0.9800 . ?
C7 F9 1.338(3) . ?
C7 F8 1.339(3) . ?
C7 F7 1.347(3) . ?
C8 F12 1.335(3) . ?
C8 F10 1.336(3) . ?
C8 F11 1.348(3) . ?
C9 O3 1.372(3) . ?
C9 C11 1.537(4) . ?
C9 C10 1.539(4) . ?
C9 C12 1.545(4) . ?
C10 H10A 0.9800 . ?
C10 H10B 0.9800 . ?
C10 H10C 0.9800 . ?
C11 F18 1.330(3) . ?
C11 F16 1.340(3) . ?
C11 F17 1.353(3) . ?
C12 F13 1.329(4) . ?
C12 F15 1.337(3) . ?
C12 F14 1.343(3) . ?
C13 N1 1.366(4) . ?
C13 C14 1.382(4) . ?
C13 C15 2.008(4) . ?
C13 Mo1 2.108(3) . ?
C14 C15 1.390(4) . ?
C14 C16 1.479(4) . ?
C15 N2 1.364(4) . ?
C15 Mo1 2.109(3) . ?
C16 C17 1.391(4) . ?
C16 C21 1.402(4) . ?
C17 C18 1.392(4) . ?
C17 H17 0.9500 . ?
C18 C19 1.383(4) . ?
C18 H18 0.9500 . ?
C19 C20 1.384(5) . ?
C19 H19 0.9500 . ?
C20 C21 1.377(4) . ?
C20 H20 0.9500 . ?
C21 H21 0.9500 . ?
C22 O5 1.250(3) . ?
C22 N1 1.345(4) . ?
C22 C23 1.495(4) . ?
C23 C24 1.529(4) . ?
C23 H23A 0.9900 . ?
C23 H23B 0.9900 . ?
C24 C25 1.519(4) . ?
C24 H24A 0.9900 . ?
C24 H24B 0.9900 . ?
C25 N1 1.480(4) . ?
C25 H25A 0.9900 . ?
C25 H25B 0.9900 . ?
C26 O4 1.249(3) . ?
C26 N2 1.340(4) . ?
C26 C27 1.503(4) . ?
C27 C28 1.532(4) . ?
C27 H27A 0.9900 . ?
C27 H27B 0.9900 . ?
C28 C29 1.537(4) . ?
C28 H28A 0.9900 . ?
C28 H28B 0.9900 . ?
C29 N2 1.477(4) . ?
C29 H29A 0.9900 . ?
C29 H29B 0.9900 . ?
O1 Mo1 1.9793(18) . ?
O2 Mo1 1.9803(19) . ?
O3 Mo1 2.0227(17) . ?
O4 Mo1 2.1642(19) . ?
O5 Mo1 2.1077(18) . ?
 
loop_
 _geom_angle_atom_site_label_1
 _geom_angle_atom_site_label_2
 _geom_angle_atom_site_label_3
 _geom_angle
 _geom_angle_site_symmetry_1
 _geom_angle_site_symmetry_3
 _geom_angle_publ_flag
O1 C1 C2 115.7(2) . . ?
O1 C1 C3 105.2(2) . . ?
C2 C1 C3 109.5(3) . . ?
O1 C1 C4 107.4(2) . . ?
C2 C1 C4 109.1(3) . . ?
C3 C1 C4 109.7(2) . . ?
C1 C2 H2A 109.5 . . ?
C1 C2 H2B 109.5 . . ?
H2A C2 H2B 109.5 . . ?
C1 C2 H2C 109.5 . . ?
H2A C2 H2C 109.5 . . ?
H2B C2 H2C 109.5 . . ?
F1 C3 F2 106.8(2) . . ?
F1 C3 F3 106.7(3) . . ?
F2 C3 F3 106.7(2) . . ?
F1 C3 C1 110.6(2) . . ?
F2 C3 C1 113.3(3) . . ?
F3 C3 C1 112.3(3) . . ?
F5 C4 F6 106.9(3) . . ?
F5 C4 F4 105.9(3) . . ?
F6 C4 F4 106.5(3) . . ?
F5 C4 C1 113.0(3) . . ?
F6 C4 C1 113.3(3) . . ?
F4 C4 C1 110.7(2) . . ?
O2 C5 C6 116.0(2) . . ?
O2 C5 C8 105.9(2) . . ?
C6 C5 C8 108.4(2) . . ?
O2 C5 C7 108.7(2) . . ?
C6 C5 C7 108.8(2) . . ?
C8 C5 C7 108.8(2) . . ?
C5 C6 H6A 109.5 . . ?
C5 C6 H6B 109.5 . . ?
H6A C6 H6B 109.5 . . ?
C5 C6 H6C 109.5 . . ?
H6A C6 H6C 109.5 . . ?
H6B C6 H6C 109.5 . . ?
F9 C7 F8 107.1(2) . . ?
F9 C7 F7 106.4(2) . . ?
F8 C7 F7 106.1(2) . . ?
F9 C7 C5 110.9(2) . . ?
F8 C7 C5 113.2(2) . . ?
F7 C7 C5 112.7(2) . . ?
F12 C8 F10 106.6(2) . . ?
F12 C8 F11 106.3(2) . . ?
F10 C8 F11 106.7(2) . . ?
F12 C8 C5 113.0(2) . . ?
F10 C8 C5 111.0(2) . . ?
F11 C8 C5 112.8(2) . . ?
O3 C9 C11 105.9(2) . . ?
O3 C9 C10 116.8(2) . . ?
C11 C9 C10 108.5(2) . . ?
O3 C9 C12 108.0(2) . . ?
C11 C9 C12 109.9(2) . . ?
C10 C9 C12 107.6(2) . . ?
C9 C10 H10A 109.5 . . ?
C9 C10 H10B 109.5 . . ?
H10A C10 H10B 109.5 . . ?
C9 C10 H10C 109.5 . . ?
H10A C10 H10C 109.5 . . ?
H10B C10 H10C 109.5 . . ?
F18 C11 F16 106.5(2) . . ?
F18 C11 F17 106.4(3) . . ?
F16 C11 F17 106.0(2) . . ?
F18 C11 C9 113.5(2) . . ?
F16 C11 C9 113.9(3) . . ?
F17 C11 C9 110.0(2) . . ?
F13 C12 F15 107.3(3) . . ?
F13 C12 F14 106.8(2) . . ?
F15 C12 F14 106.4(2) . . ?
F13 C12 C9 110.0(2) . . ?
F15 C12 C9 113.1(2) . . ?
F14 C12 C9 112.9(3) . . ?
N1 C13 C14 137.3(3) . . ?
N1 C13 C15 174.6(2) . . ?
C14 C13 C15 43.76(16) . . ?
N1 C13 Mo1 117.0(2) . . ?
C14 C13 Mo1 105.3(2) . . ?
C15 C13 Mo1 61.60(12) . . ?
C13 C14 C15 92.8(2) . . ?
C13 C14 C16 133.8(3) . . ?
C15 C14 C16 133.4(3) . . ?
N2 C15 C14 136.4(3) . . ?
N2 C15 C13 176.7(2) . . ?
C14 C15 C13 43.45(16) . . ?
N2 C15 Mo1 118.4(2) . . ?
C14 C15 Mo1 104.99(19) . . ?
C13 C15 Mo1 61.55(11) . . ?
C17 C16 C21 118.5(3) . . ?
C17 C16 C14 120.6(2) . . ?
C21 C16 C14 120.8(3) . . ?
C16 C17 C18 121.1(3) . . ?
C16 C17 H17 119.4 . . ?
C18 C17 H17 119.4 . . ?
C19 C18 C17 119.5(3) . . ?
C19 C18 H18 120.3 . . ?
C17 C18 H18 120.3 . . ?
C18 C19 C20 119.9(3) . . ?
C18 C19 H19 120.0 . . ?
C20 C19 H19 120.0 . . ?
C21 C20 C19 120.8(3) . . ?
C21 C20 H20 119.6 . . ?
C19 C20 H20 119.6 . . ?
C20 C21 C16 120.2(3) . . ?
C20 C21 H21 119.9 . . ?
C16 C21 H21 119.9 . . ?
O5 C22 N1 118.2(3) . . ?
O5 C22 C23 130.8(3) . . ?
N1 C22 C23 111.0(3) . . ?
C22 C23 C24 102.4(2) . . ?
C22 C23 H23A 111.3 . . ?
C24 C23 H23A 111.3 . . ?
C22 C23 H23B 111.3 . . ?
C24 C23 H23B 111.3 . . ?
H23A C23 H23B 109.2 . . ?
C25 C24 C23 106.3(2) . . ?
C25 C24 H24A 110.5 . . ?
C23 C24 H24A 110.5 . . ?
C25 C24 H24B 110.5 . . ?
C23 C24 H24B 110.5 . . ?
H24A C24 H24B 108.7 . . ?
N1 C25 C24 102.5(2) . . ?
N1 C25 H25A 111.3 . . ?
C24 C25 H25A 111.3 . . ?
N1 C25 H25B 111.3 . . ?
C24 C25 H25B 111.3 . . ?
H25A C25 H25B 109.2 . . ?
O4 C26 N2 119.6(3) . . ?
O4 C26 C27 130.3(3) . . ?
N2 C26 C27 110.1(2) . . ?
C26 C27 C28 102.1(2) . . ?
C26 C27 H27A 111.3 . . ?
C28 C27 H27A 111.3 . . ?
C26 C27 H27B 111.3 . . ?
C28 C27 H27B 111.3 . . ?
H27A C27 H27B 109.2 . . ?
C27 C28 C29 105.3(2) . . ?
C27 C28 H28A 110.7 . . ?
C29 C28 H28A 110.7 . . ?
C27 C28 H28B 110.7 . . ?
C29 C28 H28B 110.7 . . ?
H28A C28 H28B 108.8 . . ?
N2 C29 C28 101.5(2) . . ?
N2 C29 H29A 111.5 . . ?
C28 C29 H29A 111.5 . . ?
N2 C29 H29B 111.5 . . ?
C28 C29 H29B 111.5 . . ?
H29A C29 H29B 109.3 . . ?
C22 N1 C13 113.1(2) . . ?
C22 N1 C25 112.2(2) . . ?
C13 N1 C25 134.3(2) . . ?
C26 N2 C15 112.9(2) . . ?
C26 N2 C29 113.2(2) . . ?
C15 N2 C29 134.0(3) . . ?
C1 O1 Mo1 143.81(17) . . ?
C5 O2 Mo1 146.18(17) . . ?
C9 O3 Mo1 142.51(16) . . ?
C26 O4 Mo1 117.41(18) . . ?
C22 O5 Mo1 118.88(18) . . ?
O1 Mo1 O2 93.96(8) . . ?
O1 Mo1 O3 174.24(8) . . ?
O2 Mo1 O3 91.56(8) . . ?
O1 Mo1 O5 101.39(7) . . ?
O2 Mo1 O5 81.19(7) . . ?
O3 Mo1 O5 81.08(7) . . ?
O1 Mo1 C13 93.08(9) . . ?
O2 Mo1 C13 153.12(10) . . ?
O3 Mo1 C13 82.70(9) . . ?
O5 Mo1 C13 72.00(9) . . ?
O1 Mo1 C15 82.62(9) . . ?
O2 Mo1 C15 149.91(10) . . ?
O3 Mo1 C15 91.77(9) . . ?
O5 Mo1 C15 128.85(9) . . ?
C13 Mo1 C15 56.86(11) . . ?
O1 Mo1 O4 80.98(7) . . ?
O2 Mo1 O4 78.58(8) . . ?
O3 Mo1 O4 98.53(7) . . ?
O5 Mo1 O4 159.75(7) . . ?
C13 Mo1 O4 128.18(10) . . ?
C15 Mo1 O4 71.35(9) . . ?
 
_refine_diff_density_max    0.695
_refine_diff_density_min   -0.413
_refine_diff_density_rms    0.081
 
_shelx_res_file
;
 
    shelx.res created by SHELXL-2014/7
 
TITL shelxt_a.res in P-1
CELL  0.71073  10.0185  10.8539  17.1855   77.653   80.752   84.727
ZERR     2.00   0.0003   0.0003   0.0005    0.002    0.002    0.002
LATT   1
SFAC  C    H    N    O    F    MO
UNIT  58 52 4 10 36 2
MERG   2
ABIN
FMAP   2
PLAN   20
SIZE     0.040   0.080   0.360
ACTA    50.00
BOND   $H
LIST   4
WPDB  -2
L.S.  10
TEMP  -173.00
WGHT    0.040100    1.450100
FVAR       0.37405   0.66901
C1    1    0.236740    0.570630    0.854915    11.00000    0.01491    0.02746 =
         0.01651   -0.00390    0.00398   -0.00454
C2    1    0.287303    0.597222    0.928716    11.00000    0.02552    0.03837 =
         0.02295   -0.00948    0.00115   -0.00466
AFIX  33
H2A   2    0.212781    0.591043    0.973669    11.00000   -1.50000
H2B   2    0.361050    0.535236    0.943683    11.00000   -1.50000
H2C   2    0.320482    0.682430    0.916091    11.00000   -1.50000
AFIX   0
C3    1    0.187966    0.436400    0.873899    11.00000    0.01825    0.03564 =
         0.02141    0.00137    0.00051   -0.00497
C4    1    0.119235    0.666265    0.832990    11.00000    0.02164    0.03477 =
         0.02389    0.00052    0.00357    0.00034
C5    1    0.695820    0.377493    0.795503    11.00000    0.01680    0.01892 =
         0.02070   -0.00496   -0.00151   -0.00266
C6    1    0.816112    0.439677    0.812512    11.00000    0.01776    0.02480 =
         0.02827   -0.00462   -0.00697   -0.00230
AFIX  33
H6A   2    0.877050    0.374747    0.839765    11.00000   -1.50000
H6B   2    0.865171    0.483662    0.761638    11.00000   -1.50000
H6C   2    0.783171    0.500455    0.847030    11.00000   -1.50000
AFIX   0
C7    1    0.624298    0.303187    0.875512    11.00000    0.02055    0.01972 =
         0.02241   -0.00656   -0.00438   -0.00030
C8    1    0.750057    0.284589    0.740001    11.00000    0.02067    0.02201 =
         0.02182   -0.00219   -0.00104   -0.00216
C9    1    0.757348    0.760878    0.607930    11.00000    0.01407    0.02581 =
         0.01748   -0.00151    0.00090   -0.00506
C10   1    0.669489    0.805651    0.540383    11.00000    0.01495    0.03772 =
         0.02080    0.00167    0.00036   -0.00691
AFIX  33
H10A  2    0.726302    0.844783    0.490966    11.00000   -1.50000
H10B  2    0.627664    0.733149    0.530783    11.00000   -1.50000
H10C  2    0.598538    0.867538    0.556373    11.00000   -1.50000
AFIX   0
C11   1    0.820718    0.876263    0.622326    11.00000    0.01741    0.02507 =
         0.02728    0.00659   -0.00103   -0.00542
C12   1    0.869934    0.666734    0.579117    11.00000    0.02149    0.03105 =
         0.02275   -0.00361    0.00122   -0.00428
C13   1    0.471832    0.814191    0.761314    11.00000    0.01482    0.01796 =
         0.01848   -0.00402    0.00191   -0.00429
C14   1    0.396055    0.877750    0.702937    11.00000    0.01627    0.01949 =
         0.01352   -0.00222    0.00169   -0.00475
C15   1    0.403219    0.774120    0.666561    11.00000    0.01267    0.02277 =
         0.01229    0.00067    0.00098   -0.00370
C16   1    0.327566    1.005387    0.687135    11.00000    0.01932    0.02255 =
         0.01259   -0.00136   -0.00118    0.00212
C17   1    0.396041    1.111704    0.685951    11.00000    0.02209    0.02065 =
         0.02160   -0.00184   -0.00525   -0.00084
AFIX  43
H17   2    0.489301    1.102442    0.691893    11.00000   -1.20000
AFIX   0
C18   1    0.330240    1.231448    0.676206    11.00000    0.04072    0.01992 =
         0.02410   -0.00397   -0.00507   -0.00403
AFIX  43
H18   2    0.378032    1.303250    0.675882    11.00000   -1.20000
AFIX   0
C19   1    0.194697    1.245074    0.666999    11.00000    0.03638    0.02660 =
         0.02234   -0.00222    0.00028    0.01261
AFIX  43
H19   2    0.148667    1.326315    0.661029    11.00000   -1.20000
AFIX   0
C20   1    0.126212    1.140281    0.666490    11.00000    0.02382    0.03448 =
         0.01862   -0.00297   -0.00088    0.00649
AFIX  43
H20   2    0.033707    1.150411    0.658842    11.00000   -1.20000
AFIX   0
C21   1    0.190561    1.021473    0.676939    11.00000    0.01964    0.02828 =
         0.01561   -0.00104    0.00161   -0.00161
AFIX  43
H21   2    0.141963    0.950185    0.677240    11.00000   -1.20000
AFIX   0
C22   1    0.602314    0.743412    0.859495    11.00000    0.01889    0.01752 =
         0.01425   -0.00037    0.00093   -0.00305
C23   1    0.673076    0.781663    0.920076    11.00000    0.02991    0.02098 =
         0.02071   -0.00503   -0.00952   -0.00085
AFIX  23
H23A  2    0.771406    0.787301    0.901053    11.00000   -1.20000
H23B  2    0.659389    0.721663    0.972489    11.00000   -1.20000
AFIX   0
C24   1    0.604102    0.911582    0.926284    11.00000    0.04318    0.02723 =
         0.02532   -0.00809   -0.01245   -0.00140
AFIX  23
H24A  2    0.531792    0.904518    0.973341    11.00000   -1.20000
H24B  2    0.670752    0.969613    0.932256    11.00000   -1.20000
AFIX   0
C25   1    0.544537    0.960164    0.848749    11.00000    0.03116    0.01704 =
         0.02622   -0.00753   -0.00843    0.00030
AFIX  23
H25A  2    0.455609    1.006311    0.858825    11.00000   -1.20000
H25B  2    0.606332    1.016347    0.808808    11.00000   -1.20000
AFIX   0
C26   1    0.385758    0.626439    0.594993    11.00000    0.01292    0.02538 =
         0.01689   -0.00322    0.00299   -0.00453
C27   1    0.322939    0.599909    0.526996    11.00000    0.01900    0.03555 =
         0.02375   -0.01329   -0.00590   -0.00134
AFIX  23
H27A  2    0.242666    0.549232    0.547301    11.00000   -1.20000
H27B  2    0.388864    0.555149    0.491621    11.00000   -1.20000
AFIX   0
C28   1    0.282984    0.733198    0.482973    11.00000    0.02211    0.04294 =
         0.01858   -0.00647   -0.00592    0.00034
AFIX  23
H28A  2    0.198717    0.733440    0.459715    11.00000   -1.20000
H28B  2    0.355862    0.765266    0.439108    11.00000   -1.20000
AFIX   0
C29   1    0.261350    0.814566    0.547463    11.00000    0.02006    0.02680 =
         0.02320   -0.00100   -0.00766    0.00073
AFIX  23
H29A  2    0.290196    0.901377    0.524772    11.00000   -1.20000
H29B  2    0.165479    0.818563    0.572809    11.00000   -1.20000
AFIX   0
N1    3    0.530308    0.842269    0.821423    11.00000    0.02063    0.01506 =
         0.01607   -0.00428   -0.00297   -0.00081
N2    3    0.349890    0.744641    0.605116    11.00000    0.01335    0.02546 =
         0.01446   -0.00362   -0.00164   -0.00248
O1    4    0.332041    0.576219    0.786656    11.00000    0.01551    0.02443 =
         0.01774   -0.00324    0.00229   -0.00400
O2    4    0.601164    0.457807    0.757141    11.00000    0.01497    0.01693 =
         0.01901   -0.00348   -0.00314   -0.00032
O3    4    0.692586    0.703638    0.681533    11.00000    0.01226    0.02168 =
         0.01580   -0.00144    0.00000   -0.00475
O4    4    0.462042    0.557687    0.639315    11.00000    0.01592    0.02421 =
         0.01759   -0.00698   -0.00033   -0.00253
O5    4    0.601972    0.639093    0.839693    11.00000    0.01843    0.01588 =
         0.01545   -0.00350   -0.00124   -0.00232
F1    5    0.289962    0.351972    0.888087    11.00000    0.02799    0.02636 =
         0.03631    0.00174   -0.00612   -0.00353
F2    5    0.092857    0.414615    0.938631    11.00000    0.03367    0.04119 =
         0.03206   -0.00314    0.01581   -0.01553
F3    5    0.135923    0.409687    0.812631    11.00000    0.02718    0.03954 =
         0.03665   -0.00898   -0.00791   -0.01240
F4    5    0.155402    0.784786    0.824539    11.00000    0.02954    0.02654 =
         0.04718   -0.00304    0.00675    0.00294
F5    5    0.080442    0.660057    0.763516    11.00000    0.03993    0.05842 =
         0.03955   -0.00658   -0.02084    0.01185
F6    5    0.009114    0.653212    0.888652    11.00000    0.02042    0.05190 =
         0.04596    0.00457    0.01255    0.00500
F7    5    0.711173    0.228774    0.919940    11.00000    0.03261    0.02741 =
         0.02343    0.00224   -0.00549    0.00518
F8    5    0.533053    0.227294    0.865564    11.00000    0.02541    0.02407 =
         0.02809   -0.00796    0.00367   -0.00931
F9    5    0.558934    0.381641    0.921242    11.00000    0.02683    0.02177 =
         0.01974   -0.00655    0.00096   -0.00294
F10   5    0.833606    0.340176    0.676048    11.00000    0.02441    0.03294 =
         0.02730   -0.00862    0.00829   -0.00347
F11   5    0.820234    0.182850    0.776963    11.00000    0.03246    0.02659 =
         0.03417   -0.00761   -0.00467    0.01212
F12   5    0.652032    0.239951    0.711495    11.00000    0.02811    0.02969 =
         0.02950   -0.01589   -0.00293   -0.00312
F13   5    0.815243    0.567535    0.565766    11.00000    0.03485    0.03677 =
         0.04015   -0.01956    0.00004   -0.00671
F14   5    0.946559    0.716926    0.509980    11.00000    0.02508    0.04924 =
         0.02336    0.00066    0.00904    0.00131
F15   5    0.955041    0.622986    0.632545    11.00000    0.02216    0.03747 =
         0.02611   -0.00350   -0.00326    0.00532
F16   5    0.894755    0.940216    0.556666    11.00000    0.02959    0.03692 =
         0.03799    0.00879    0.00262   -0.01597
F17   5    0.722198    0.959736    0.646410    11.00000    0.02984    0.02398 =
         0.04900   -0.00784    0.00089   -0.00258
F18   5    0.900397    0.847879    0.679301    11.00000    0.03134    0.02948 =
         0.03816   -0.00156   -0.01560   -0.01110
MO1   6    0.514937    0.631081    0.737217    11.00000    0.01361    0.01661 =
         0.01470   -0.00318   -0.00084   -0.00259
HKLF    4
 
REM  shelxt_a.res in P-1
REM R1 =  0.0367 for    5518 Fo > 4sig(Fo)  and  0.0462 for all    6499 data
REM    497 parameters refined using      0 restraints
 
END
 
WGHT      0.0393      1.5013
 
REM Highest difference peak  0.695,  deepest hole -0.413,  1-sigma level  0.081
Q1    1   0.5565  0.5454  0.7651  11.00000  0.05    0.64
Q2    1   0.4579  1.1047  0.7840  11.00000  0.05    0.61
Q3    1   0.4785  0.7118  0.7010  11.00000  0.05    0.55
Q4    1   0.4995  0.7263  0.7574  11.00000  0.05    0.47
Q5    1   0.8247  0.5195  0.7759  11.00000  0.05    0.46
Q6    1   0.1764  0.7125  0.9258  11.00000  0.05    0.43
Q7    1   0.3750  0.5979  0.5586  11.00000  0.05    0.42
Q8    1   0.3738  0.5995  0.8249  11.00000  0.05    0.40
Q9    1   0.5650  0.6181  0.7906  11.00000  0.05    0.39
Q10   1   0.8017  0.7179  0.5974  11.00000  0.05    0.39
Q11   1   0.7234  0.7818  0.5718  11.00000  0.05    0.38
Q12   1   0.2593  0.4726  0.9802  11.00000  0.05    0.38
Q13   1   0.7150  0.3199  0.7712  11.00000  0.05    0.38
Q14   1   0.7993  0.4545  0.8578  11.00000  0.05    0.38
Q15   1   0.6223  0.9826  0.9422  11.00000  0.05    0.37
Q16   1   0.3422  0.4916  0.8101  11.00000  0.05    0.36
Q17   1   0.4836  0.8535  0.7863  11.00000  0.05    0.36
Q18   1   0.3557  1.0546  0.6878  11.00000  0.05    0.34
Q19   1   0.3555  0.9356  0.7042  11.00000  0.05    0.34
Q20   1   0.5672  0.8058  0.8332  11.00000  0.05    0.34
;
_shelx_res_checksum   68097
 
_shelx_hkl_file
;
  -1   0   0 1801.92   61.89
  -1   0   0 1768.82   62.09
  -1   0   0 1844.32   62.59
  -1   0   0 1788.12   62.29
  -1   0   0 1859.41   62.49
  -1   0   0 1788.52   62.59
  -1   0   0 1792.02   62.39
   1   0   0 1716.13   62.29
   1   0   0 1818.32   62.09
   1   0   0 1752.62   62.49
   1   0   0 1807.12   62.29
   1   0   0 1752.02   62.49
   1   0   0 1703.03   62.49
   1   0   0 1737.03   61.89
  -2   0   0   11.50    2.80
  -2   0   0    5.70    2.30
  -2   0   0    3.20    1.40
  -2   0   0    4.50    2.20
  -2   0   0    9.50    2.90
  -2   0   0    2.80    2.30
  -2   0   0    9.20    3.00
   2   0   0    4.70    2.30
   2   0   0    7.20    1.90
   2   0   0    8.70    1.70
   2   0   0    4.80    2.10
   2   0   0    7.00    2.70
   2   0   0    8.20    2.80
   2   0   0    5.20    2.30
  -3   0   0  395.56   17.50
  -3   0   0  414.86   18.00
  -3   0   0  403.96   16.00
  -3   0   0  423.26   18.00
  -3   0   0  416.46   17.90
  -3   0   0  409.56   16.90
  -3   0   0  441.36   17.40
   3   0   0  401.06   17.80
   3   0   0  424.26   17.90
   3   0   0  443.76   16.70
   3   0   0  405.16   17.30
   3   0   0  420.56   17.60
   3   0   0  417.36   15.90
  -4   0   0   24.70    5.10
  -4   0   0   18.30    4.30
  -4   0   0   34.60    6.20
  -4   0   0   25.70    3.40
  -4   0   0   25.00    4.50
  -4   0   0   26.60    4.60
  -4   0   0   20.40    4.90
   4   0   0   30.00    3.30
   4   0   0   21.00    4.70
   4   0   0   31.20    5.10
   4   0   0   25.90    3.80
   4   0   0   23.10    4.60
   4   0   0   30.50    5.20
  -5   0   0  676.63   27.80
  -5   0   0  698.73   29.60
  -5   0   0  710.83   29.80
  -5   0   0  621.14   29.20
  -5   0   0  690.23   29.10
  -5   0   0  668.33   28.20
   5   0   0  684.73   28.80
   5   0   0  711.73   26.20
   5   0   0  675.43   29.20
   5   0   0  698.93   28.70
   5   0   0  689.73   27.20
   5   0   0  700.83   29.50
  -6   0   0  584.14   27.80
  -6   0   0  585.14   27.10
  -6   0   0  604.04   26.30
  -6   0   0  601.24   27.90
  -6   0   0  624.34   27.80
  -6   0   0  611.74   25.90
   6   0   0  568.14   27.10
   6   0   0  609.64   26.80
   6   0   0  600.24   27.40
   6   0   0  587.04   23.60
   6   0   0  631.74   26.70
  -7   0   0   21.40    5.60
  -7   0   0   22.80    6.90
  -7   0   0   30.20    6.20
  -7   0   0   28.20    6.90
  -7   0   0   35.50    8.40
   7   0   0   31.50    7.40
   7   0   0   36.10    7.20
   7   0   0   33.20    4.80
   7   0   0   42.50    7.50
  -8   0   0   12.60    5.40
  -8   0   0   16.10    7.20
  -8   0   0    9.50    5.50
  -8   0   0   11.80    7.00
  -8   0   0    9.00    6.10
   8   0   0   13.10    6.00
   8   0   0    4.30    3.10
   8   0   0   10.90    5.50
  -9   0   0  216.28   15.70
  -9   0   0  183.18   14.60
  -9   0   0  196.18   17.50
  -9   0   0  183.48   16.20
   9   0   0  215.88   16.40
   9   0   0  206.98   11.60
 -10   0   0  138.99   16.80
 -10   0   0  102.69   14.00
 -10   0   0  114.29   12.80
 -10   0   0  120.99   15.30
  10   0   0  110.39   13.30
  10   0   0  129.39    9.30
 -11   0   0    9.20    7.00
 -11   0   0   11.30    9.30
 -11   0   0    8.90    7.60
  11   0   0    7.80    8.10
  11   0   0    9.40    4.50
 -11   1   0  178.98   16.50
 -11   1   0  200.58   20.60
 -11   1   0  228.78   19.00
  10  -1   0   14.80    4.40
  10  -1   0   27.00    8.20
 -10   1   0   21.90    8.50
 -10   1   0   21.10    7.30
 -10   1   0   14.30    7.90
 -10   1   0   30.80    9.90
   9  -1   0   32.20    8.20
   9  -1   0   45.20    6.00
  -9   1   0   44.20    9.50
  -9   1   0   18.50    8.00
  -9   1   0   35.20    9.10
  -9   1   0   46.10    9.10
   8  -1   0  113.69    7.50
   8  -1   0  119.69   11.60
   8  -1   0   89.19    9.70
   8  -1   0  109.89   10.70
  -8   1   0   95.99   12.80
  -8   1   0   74.89   11.50
  -8   1   0  108.89   11.30
  -8   1   0  104.79   12.40
  -8   1   0  117.99   10.80
   7  -1   0   98.79    6.50
   7  -1   0   98.39    7.20
   7  -1   0   64.19    7.80
   7  -1   0   93.79   10.00
   7  -1   0  105.29    9.20
  -7   1   0  102.49   10.90
  -7   1   0   96.39    9.90
  -7   1   0   74.19    8.60
  -7   1   0  116.69   11.70
  -7   1   0   95.99   10.50
   6  -1   0  240.78   11.30
   6  -1   0  222.68   13.00
   6  -1   0  224.68   13.90
   6  -1   0  225.58   10.40
  -6   1   0  228.28   14.40
  -6   1   0  233.48   13.70
  -6   1   0  235.68   14.10
  -6   1   0  215.98   12.60
  -6   1   0  201.18   14.10
  -6   1   0  193.78   14.00
   5  -1   0  243.48   10.70
   5  -1   0  255.57   11.50
   5  -1   0  246.38   13.00
   5  -1   0  240.18   12.90
   5  -1   0  225.48   13.80
  -5   1   0  253.27   12.70
  -5   1   0  230.58   13.50
  -5   1   0  263.17   14.60
  -5   1   0  234.18   14.00
  -5   1   0  272.37   14.70
  -5   1   0  268.57   13.80
   4  -1   0   11.90    3.10
   4  -1   0    7.80    2.00
   4  -1   0    4.50    2.00
   4  -1   0   10.80    3.30
   4  -1   0    6.10    2.90
   4  -1   0    4.20    2.90
  -4   1   0   10.30    3.60
  -4   1   0    5.10    3.30
  -4   1   0    8.50    3.00
  -4   1   0   16.80    4.40
  -4   1   0    3.40    1.80
  -4   1   0   12.80    3.60
  -4   1   0    7.30    3.40
   3  -1   0  574.34   22.60
   3  -1   0  600.74   23.20
   3  -1   0  570.44   23.60
   3  -1   0  578.04   21.20
   3  -1   0  574.14   21.60
   3  -1   0  608.14   22.80
  -3   1   0  568.24   22.10
  -3   1   0  559.74   23.20
  -3   1   0  587.74   21.50
  -3   1   0  578.24   23.10
  -3   1   0  611.54   23.90
  -3   1   0  579.34   23.40
  -3   1   0  547.15   23.30
   2  -1   0   44.80    4.50
   2  -1   0   31.40    3.80
   2  -1   0   43.30    3.70
   2  -1   0   41.40    3.60
  -2   1   0   38.60    4.40
  -2   1   0   48.40    4.50
  -2   1   0   39.90    4.70
  -2   1   0   47.90    4.50
  -2   1   0   39.30    3.40
  -2   1   0   42.70    4.00
  -2   1   0   41.20    2.70
   1  -1   0  100.99    4.30
   1  -1   0  101.49    5.00
   1  -1   0   99.29    4.90
   1  -1   0   96.79    4.10
  -1   1   0   99.19    4.90
  -1   1   0  103.89    4.80
  -1   1   0   97.99    4.40
  -1   1   0   93.29    4.30
   0  -1   0 1724.13   62.49
   0   1   0 1846.42   62.49
  -1  -1   0  610.14   21.10
  -1  -1   0  603.34   21.20
  -1  -1   0  573.24   21.40
  -1  -1   0  603.24   21.60
  -1  -1   0  608.34   20.90
  -1  -1   0  584.94   21.80
   1   1   0  602.44   21.70
   1   1   0  580.34   21.60
   1   1   0  573.74   21.40
   1   1   0  609.54   21.10
   1   1   0  583.14   21.30
   1   1   0  601.54   21.90
   1   1   0  582.24   20.90
  -2  -1   0  952.90   34.60
  -2  -1   0  903.61   35.60
  -2  -1   0  963.50   36.00
  -2  -1   0 1003.30   35.20
  -2  -1   0  972.10   34.70
  -2  -1   0  970.20   35.90
  -2  -1   0 1016.40   35.70
   2   1   0  960.50   35.10
   2   1   0  946.01   35.60
   2   1   0  969.00   34.80
   2   1   0  997.10   36.10
   2   1   0  998.70   35.60
   2   1   0  970.70   35.90
   2   1   0  939.21   34.60
  -3  -1   0    1.50    2.30
  -3  -1   0    9.00    3.00
  -3  -1   0    7.90    2.50
  -3  -1   0    8.80    2.80
  -3  -1   0   10.80    3.30
  -3  -1   0   -0.50    2.90
  -3  -1   0    2.30    1.70
   3   1   0    8.10    2.10
   3   1   0    2.60    2.80
   3   1   0    4.90    2.90
   3   1   0    6.10    2.60
   3   1   0    9.40    2.50
   3   1   0    5.40    2.70
   3   1   0    8.90    2.40
  -4  -1   0  397.86   19.00
  -4  -1   0  435.06   16.70
  -4  -1   0  412.36   18.60
  -4  -1   0  402.66   18.50
  -4  -1   0  430.86   17.70
  -4  -1   0  417.96   17.40
  -4  -1   0  410.96   19.10
   4   1   0  390.26   18.10
   4   1   0  400.26   18.90
   4   1   0  431.36   18.90
   4   1   0  406.36   18.40
   4   1   0  395.56   16.40
   4   1   0  414.96   17.30
   4   1   0  399.16   17.30
  -5  -1   0   16.60    5.00
  -5  -1   0   13.70    3.80
  -5  -1   0   13.20    4.50
  -5  -1   0   11.40    4.40
  -5  -1   0   14.00    3.90
  -5  -1   0   11.70    4.20
   5   1   0   13.10    4.40
   5   1   0   13.60    4.60
   5   1   0    8.60    3.80
   5   1   0   12.80    3.10
   5   1   0   16.70    4.20
  -6  -1   0   92.19    8.10
  -6  -1   0  102.69    8.50
  -6  -1   0   91.19    9.60
  -6  -1   0   80.69    9.80
  -6  -1   0   94.89    9.50
  -6  -1   0   91.49    9.10
   6   1   0   84.59    9.20
   6   1   0  104.79    9.40
   6   1   0   77.29    8.70
   6   1   0  107.09    6.80
   6   1   0   94.39    8.80
  -7  -1   0    5.70    4.20
  -7  -1   0    6.80    4.80
  -7  -1   0    6.80    6.00
  -7  -1   0    6.00    4.40
  -7  -1   0    6.20    5.20
   7   1   0   12.20    3.40
   7   1   0    5.20    4.80
   7   1   0    2.80    4.20
   7   1   0    9.20    4.70
  -8  -1   0   13.80    7.20
  -8  -1   0    2.00    4.70
  -8  -1   0   11.10    5.40
  -8  -1   0   11.70    6.90
  -8  -1   0   12.20    6.40
   8   1   0    1.90    4.50
   8   1   0    9.70    5.90
   8   1   0   10.30    3.80
  -9  -1   0   22.50    7.00
  -9  -1   0   33.40    8.60
  -9  -1   0   20.70    8.60
  -9  -1   0   11.50    6.10
   9   1   0   28.80    7.40
   9   1   0   25.90    5.80
 -10  -1   0   24.00    7.80
 -10  -1   0   24.40    7.70
 -10  -1   0   40.50   11.00
  10   1   0   20.10    7.60
  10   1   0   15.90    4.60
 -11  -1   0   11.80   10.20
 -11  -1   0    8.70    7.60
 -11  -1   0   18.60    8.20
  11   1   0    7.60    7.30
  11   1   0    9.90    5.00
  11  -2   0   31.00    9.90
 -11   2   0   32.70   10.90
 -11   2   0   33.80   10.80
 -11   2   0   50.49   11.30
 -11   2   0   51.69   11.60
  10  -2   0  163.58   15.30
  10  -2   0  202.38   17.20
 -10   2   0  141.29   15.80
 -10   2   0  195.68   18.30
 -10   2   0  175.98   15.30
 -10   2   0  188.28   18.40
   9  -2   0   39.20    9.50
  -9   2   0   33.10    9.60
  -9   2   0   42.60    9.90
  -9   2   0   47.10    8.90
  -9   2   0   52.79   10.00
   8  -2   0    6.30    4.20
   8  -2   0   11.60    6.00
  -8   2   0    9.80    6.10
  -8   2   0    5.40    5.10
  -8   2   0    3.00    5.80
  -8   2   0    6.30    6.00
   7  -2   0   78.69    8.80
   7  -2   0   80.09    7.60
   7  -2   0   87.99    9.90
  -7   2   0   67.79   10.30
  -7   2   0   90.49   10.20
  -7   2   0   90.59    8.90
  -7   2   0   69.89    9.90
  -7   2   0   62.89    9.50
   6  -2   0   26.60    6.40
   6  -2   0   16.20    3.90
   6  -2   0   12.30    4.20
  -6   2   0   20.70    5.40
  -6   2   0   16.70    4.50
  -6   2   0   19.20    5.70
  -6   2   0   18.60    5.10
  -6   2   0   19.60    6.00
  -6   2   0   13.60    5.10
   5  -2   0   -3.50    2.80
   5  -2   0   -0.50    2.60
   5  -2   0   -1.70    2.30
  -5   2   0   -0.30    3.60
  -5   2   0   -2.50    3.20
  -5   2   0    7.70    3.30
  -5   2   0   -1.60    3.40
  -5   2   0    1.90    3.20
  -5   2   0    0.10    3.60
   4  -2   0   53.99    5.30
   4  -2   0   52.69    4.60
   4  -2   0   42.90    4.80
   4  -2   0   41.90    5.90
  -4   2   0   58.99    6.40
  -4   2   0   52.09    6.30
  -4   2   0   49.70    5.00
  -4   2   0   55.89    3.90
  -4   2   0   47.60    6.00
  -4   2   0   48.20    6.10
  -4   2   0   47.50    5.70
   3  -2   0  106.29    7.60
   3  -2   0   96.79    6.10
   3  -2   0  101.49    5.90
   3  -2   0   98.79    7.00
  -3   2   0  107.89    6.70
  -3   2   0  104.09    7.50
  -3   2   0  104.09    7.00
  -3   2   0  116.79    7.80
  -3   2   0  117.29    6.70
  -3   2   0  108.79    5.00
  -3   2   0  109.39    5.70
   2  -2   0   -0.10    1.30
   2  -2   0    0.80    2.10
   2  -2   0    1.40    2.30
   2  -2   0    0.40    1.40
  -2   2   0   -3.80    1.90
  -2   2   0    0.80    1.70
  -2   2   0    2.30    1.90
  -2   2   0   -2.00    1.40
  -2   2   0   -2.60    2.20
   1  -2   0 1438.06   52.49
   1  -2   0 1525.15   53.29
  -1   2   0 1519.15   52.99
  -1   2   0 1424.96   52.49
   0  -2   0 1381.96   49.99
   0   2   0 1365.36   48.60
   0   2   0 1435.96   49.99
  -1  -2   0   62.99    3.40
  -1  -2   0   68.19    3.70
  -1  -2   0   66.49    3.80
   1   2   0   65.09    3.60
   1   2   0   59.89    4.20
   1   2   0   65.19    4.00
   1   2   0   58.69    3.40
  -2  -2   0  364.06   15.20
  -2  -2   0  366.36   15.00
  -2  -2   0  362.46   14.60
  -2  -2   0  367.46   14.90
  -2  -2   0  367.36   13.70
  -2  -2   0  358.06   14.00
  -2  -2   0  365.86   13.50
   2   2   0  365.36   13.90
   2   2   0  345.37   14.50
   2   2   0  373.36   15.20
   2   2   0  364.16   15.50
   2   2   0  366.76   13.60
   2   2   0  360.56   14.30
   2   2   0  365.66   15.00
  -3  -2   0  459.75   19.70
  -3  -2   0  529.85   20.90
  -3  -2   0  486.25   18.60
  -3  -2   0  474.25   18.50
  -3  -2   0  483.65   19.10
  -3  -2   0  493.25   20.30
   3   2   0  490.95   20.50
   3   2   0  478.25   20.00
   3   2   0  488.85   19.30
   3   2   0  500.25   18.70
   3   2   0  500.05   19.90
   3   2   0  462.45   20.50
   3   2   0  466.75   18.60
  -4  -2   0   55.49    6.90
  -4  -2   0   82.49    6.20
  -4  -2   0   72.39    6.80
  -4  -2   0   78.59    6.80
  -4  -2   0   87.69    7.70
  -4  -2   0   80.99    5.40
  -4  -2   0   75.59    5.60
   4   2   0   77.49    6.00
   4   2   0   77.59    6.60
   4   2   0   82.79    5.30
   4   2   0   79.09    5.70
   4   2   0   67.59    7.10
   4   2   0   67.79    7.40
   4   2   0   84.99    7.00
  -5  -2   0  291.87   13.60
  -5  -2   0  263.47   13.80
  -5  -2   0  290.27   15.80
  -5  -2   0  250.37   15.40
  -5  -2   0  270.07   15.10
  -5  -2   0  301.67   15.20
  -5  -2   0  279.87   12.90
   5   2   0  306.07   13.00
   5   2   0  290.27   14.90
   5   2   0  279.17   15.80
   5   2   0  309.67   15.70
   5   2   0  291.77   15.00
  -6  -2   0  134.39    9.60
  -6  -2   0  147.69   11.80
  -6  -2   0  128.59   11.30
  -6  -2   0  132.69   10.70
  -6  -2   0  131.19    9.20
  -6  -2   0  123.29   10.10
   6   2   0  145.59   10.60
   6   2   0  136.59    8.20
   6   2   0  119.89   11.00
   6   2   0  132.19   10.20
  -7  -2   0  101.29   10.90
  -7  -2   0  118.19    9.60
  -7  -2   0  123.09   10.10
  -7  -2   0  122.39   12.40
  -7  -2   0  112.19   17.90
   7   2   0  115.89   10.80
   7   2   0  137.29    8.50
   7   2   0  118.19   10.50
   7   2   0  138.69   12.10
  -8  -2   0   24.50    6.00
  -8  -2   0   28.30    7.40
  -8  -2   0   32.20    8.50
  -8  -2   0   12.80    5.50
   8   2   0   13.30    5.50
   8   2   0   22.20    4.60
   8   2   0   16.90    6.60
  -9  -2   0  168.78   15.80
  -9  -2   0  143.79   15.90
  -9  -2   0  163.68   13.10
  -9  -2   0  146.39   13.00
   9   2   0  145.89   14.90
   9   2   0  159.08   13.70
   9   2   0  160.98   10.60
 -10  -2   0   59.99   10.60
 -10  -2   0   36.10    8.50
 -10  -2   0   41.00   10.60
  10   2   0   58.89   10.60
  10   2   0   55.49    7.50
 -11  -2   0  139.49   14.70
 -11  -2   0  130.79   18.90
 -11  -2   0  128.39   14.00
  11   2   0  130.59   10.80
  11   2   0  121.49   14.60
  11  -3   0    3.80    7.70
 -11   3   0   -1.60    6.80
 -11   3   0    2.70    8.30
 -11   3   0   14.70    9.50
 -11   3   0    4.80    8.60
  10  -3   0   33.60    9.30
  10  -3   0   35.90    9.60
 -10   3   0   40.00   10.90
 -10   3   0   40.50   10.40
 -10   3   0   22.80    7.50
 -10   3   0   40.20   10.40
   9  -3   0    5.90    6.20
   9  -3   0    4.30    6.10
  -9   3   0    1.30    6.50
  -9   3   0    3.80    7.00
  -9   3   0    8.70    6.20
  -9   3   0   10.50    7.30
   8  -3   0   15.10    6.50
   8  -3   0   17.10    6.50
  -8   3   0    6.80    5.90
  -8   3   0   12.20    5.40
  -8   3   0   15.60    6.70
  -8   3   0   17.60    7.20
   7  -3   0    5.30    4.70
   7  -3   0   -0.40    3.40
   7  -3   0   -0.50    4.20
  -7   3   0   -0.20    3.80
  -7   3   0   -0.10    5.10
  -7   3   0    4.20    4.90
  -7   3   0   -3.70    4.50
  -7   3   0    4.90    5.10
   6  -3   0   14.90    5.20
   6  -3   0    7.30    4.70
   6  -3   0   11.60    3.70
  -6   3   0    5.40    4.20
  -6   3   0    7.80    4.70
  -6   3   0   13.80    5.20
  -6   3   0   16.40    4.40
  -6   3   0   12.30    5.30
   5  -3   0  322.97   17.00
   5  -3   0  294.17   14.60
   5  -3   0  322.07   16.80
  -5   3   0  307.27   15.90
  -5   3   0  334.27   17.70
  -5   3   0  319.27   17.00
  -5   3   0  318.57   16.60
  -5   3   0  317.47   14.50
  -5   3   0  319.87   16.20
   4  -3   0   41.70    5.90
   4  -3   0   40.10    4.50
   4  -3   0   47.80    6.10
  -4   3   0   31.60    6.30
  -4   3   0   38.90    5.80
  -4   3   0   45.10    6.30
  -4   3   0   41.50    4.40
  -4   3   0   43.40    5.40
  -4   3   0   40.50    6.00
   3  -3   0  559.84   20.40
   3  -3   0  543.05   23.10
   3  -3   0  572.04   20.60
   3  -3   0  521.55   23.30
  -3   3   0  563.44   21.80
  -3   3   0  576.04   23.60
  -3   3   0  501.05   22.90
  -3   3   0  572.84   21.40
  -3   3   0  550.64   22.10
   2  -3   0 2050.29   75.19
   2  -3   0 2111.69   76.19
  -2   3   0 2073.89   75.69
  -2   3   0 2105.39   75.29
  -2   3   0 2085.29   73.69
  -2   3   0 2193.28   75.59
  -2   3   0 2062.49   73.49
   1  -3   0  465.35   18.90
   1  -3   0  450.45   17.30
  -1   3   0  416.26   17.20
  -1   3   0  456.25   18.40
   0  -3   0 1676.93   59.59
   0   3   0 1671.03   59.39
   0   3   0 1580.74   57.39
   1   3   0  373.66   14.40
   1   3   0  392.16   15.10
   1   3   0  418.36   15.00
  -2  -3   0   12.80    2.70
  -2  -3   0   17.10    2.70
  -2  -3   0   18.30    3.20
  -2  -3   0   20.60    2.50
   2   3   0   25.20    4.00
   2   3   0   11.60    2.30
   2   3   0   15.40    3.50
   2   3   0   14.80    3.30
  -3  -3   0   65.09    5.60
  -3  -3   0   66.19    5.50
  -3  -3   0   66.29    4.00
  -3  -3   0   54.99    5.80
  -3  -3   0   65.79    5.30
   3   3   0   69.19    4.60
   3   3   0   64.19    4.10
   3   3   0   75.69    5.90
   3   3   0   69.59    5.20
   3   3   0   70.49    6.50
   3   3   0   67.49    6.20
   3   3   0   61.69    5.10
  -4  -3   0  676.13   29.20
  -4  -3   0  727.73   27.00
  -4  -3   0  693.93   29.10
  -4  -3   0  711.93   27.20
  -4  -3   0  735.63   27.90
  -4  -3   0  721.73   29.00
  -4  -3   0  716.53   29.90
   4   3   0  721.53   29.30
   4   3   0  721.53   29.80
   4   3   0  704.73   27.20
   4   3   0  737.63   28.90
   4   3   0  732.13   27.50
   4   3   0  771.62   30.60
  -5  -3   0  400.86   17.60
  -5  -3   0  346.57   14.90
  -5  -3   0  349.27   14.80
  -5  -3   0  354.86   15.90
  -5  -3   0  267.17   16.30
  -5  -3   0  331.87   18.20
  -5  -3   0  345.07   17.60
   5   3   0  322.27   16.50
   5   3   0  360.86   17.40
   5   3   0  323.97   17.90
   5   3   0  346.27   17.80
   5   3   0  351.76   15.00
  -6  -3   0  401.26   20.60
  -6  -3   0  430.06   21.60
  -6  -3   0  412.26   19.20
  -6  -3   0  406.36   20.90
  -6  -3   0  413.36   18.30
   6   3   0  419.56   18.10
   6   3   0  455.45   20.90
   6   3   0  384.46   20.30
   6   3   0  435.36   22.10
  -7  -3   0   19.10    4.50
  -7  -3   0    6.40    5.60
  -7  -3   0   20.40    6.40
  -7  -3   0   12.90    4.90
  -7  -3   0   18.10    9.40
   7   3   0   18.80    4.30
   7   3   0   11.30    5.10
   7   3   0    7.90    5.70
   7   3   0   16.30    5.40
  -8  -3   0   91.09    9.10
  -8  -3   0   88.69    9.90
  -8  -3   0   95.29   12.70
  -8  -3   0   94.69   11.50
   8   3   0   77.89   10.60
   8   3   0   76.39   11.40
   8   3   0   79.09    9.60
   8   3   0   82.69    7.80
  -9  -3   0  311.97   19.00
  -9  -3   0  356.46   23.00
  -9  -3   0  338.27   18.70
   9   3   0  314.57   22.00
   9   3   0  338.27   16.90
   9   3   0  338.77   20.60
 -10  -3   0  394.36   26.10
 -10  -3   0  426.66   22.30
 -10  -3   0  390.46   22.30
  10   3   0  407.46   19.70
  10   3   0  361.26   23.70
 -11  -3   0  167.18   15.90
 -11  -3   0  229.08   17.30
 -11  -3   0  183.08   19.80
  11   3   0  199.98   17.70
  11   3   0  203.58   13.50
  11  -4   0  100.39   15.70
 -11   4   0   82.29   16.30
 -11   4   0   90.89   13.70
 -11   4   0   56.49   13.30
 -11   4   0  102.29   16.60
  10  -4   0  181.68   17.90
  10  -4   0  219.98   18.90
 -10   4   0  217.18   16.60
 -10   4   0  223.78   20.20
 -10   4   0  211.18   19.20
 -10   4   0  242.08   20.10
   9  -4   0   46.20   10.30
   9  -4   0   87.29   12.20
  -9   4   0   76.69   12.50
  -9   4   0   70.49   12.60
  -9   4   0   72.49   13.40
  -9   4   0   76.69   10.60
   8  -4   0   37.70    9.30
   8  -4   0   33.40    8.20
  -8   4   0   42.80    8.40
  -8   4   0   49.80    9.40
  -8   4   0   53.69   10.70
  -8   4   0   43.20    9.40
   7  -4   0   85.09   10.70
   7  -4   0   78.59   10.40
  -7   4   0   71.49   10.10
  -7   4   0   87.29    8.80
  -7   4   0  102.89   11.20
  -7   4   0   72.99   10.50
  -7   4   0  103.49   11.00
   6  -4   0  195.08   10.80
   6  -4   0  191.18   13.70
   6  -4   0  181.38   13.50
  -6   4   0  209.48   13.20
  -6   4   0  179.88   13.60
  -6   4   0  187.08   11.20
  -6   4   0  202.88   13.60
  -6   4   0  223.48   14.00
   5  -4   0  548.35   21.70
   5  -4   0  570.54   25.70
   5  -4   0  529.25   25.60
  -5   4   0  513.25   24.30
  -5   4   0  543.65   25.60
  -5   4   0  532.85   23.80
  -5   4   0  548.05   25.70
  -5   4   0  549.15   23.90
  -5   4   0  592.34   22.40
   4  -4   0  167.18   10.80
   4  -4   0  163.38   11.50
  -4   4   0  174.58   10.10
  -4   4   0  135.59   10.40
  -4   4   0  173.58    9.50
  -4   4   0  177.68    9.50
  -4   4   0  155.18   11.20
   3  -4   0  774.32   32.40
   3  -4   0  791.82   31.40
  -3   4   0  815.82   29.80
  -3   4   0  791.32   29.40
  -3   4   0  729.73   31.60
  -3   4   0  777.52   31.50
   2  -4   0 3846.62  133.99
   2  -4   0 3615.94  132.09
  -2   4   0 3609.44  132.09
  -2   4   0 3968.80  133.09
  -2   4   0 3675.83  132.89
   1  -4   0  796.62   29.20
   1  -4   0  819.92   31.60
  -1   4   0  755.32   29.20
  -1   4   0  781.62   30.90
   0  -4   0  795.72   31.10
   0   4   0  770.62   28.20
   0   4   0  798.12   30.90
   1   4   0  308.37   12.40
   1   4   0  315.37   12.30
   1   4   0  316.97   14.50
  -2  -4   0  291.77   12.00
  -2  -4   0  303.97   11.90
   2   4   0  291.57   12.80
   2   4   0  286.97   12.50
   2   4   0  290.37   11.80
   2   4   0  299.07   13.30
  -3  -4   0  933.71   36.00
  -3  -4   0  958.60   34.80
  -3  -4   0  899.61   33.90
  -3  -4   0  928.81   35.30
   3   4   0  918.21   34.60
   3   4   0  924.71   34.70
   3   4   0  933.11   36.50
   3   4   0  927.91   36.00
   3   4   0  954.30   34.10
   3   4   0  922.51   35.70
  -4  -4   0    8.90    3.30
  -4  -4   0   12.90    3.80
  -4  -4   0    8.90    3.30
  -4  -4   0   11.60    2.30
   4   4   0    7.90    2.90
   4   4   0   12.10    4.20
   4   4   0    9.10    2.80
   4   4   0   10.40    2.40
   4   4   0   11.50    4.30
   4   4   0   16.00    4.00
  -5  -4   0   26.10    4.40
  -5  -4   0   17.20    4.40
  -5  -4   0   17.00    3.60
  -5  -4   0   10.60    3.90
  -5  -4   0   21.90    3.80
  -5  -4   0   24.60    6.00
   5   4   0   26.30    4.90
   5   4   0   24.20    4.50
   5   4   0   27.30    6.20
   5   4   0   12.70    4.40
  -6  -4   0   -0.60    3.90
  -6  -4   0   -1.80    4.00
  -6  -4   0   -3.90    2.80
  -6  -4   0   -0.10    2.40
  -6  -4   0   -0.40    2.60
  -6  -4   0   -2.80    3.10
   6   4   0   -1.80    3.30
   6   4   0   -2.00    3.00
   6   4   0    1.70    2.90
   6   4   0    2.40    4.30
  -7  -4   0    5.20    4.30
  -7  -4   0    5.60    5.30
  -7  -4   0    5.30    3.60
  -7  -4   0   -0.10    2.30
  -7  -4   0    4.70    5.40
   7   4   0   11.00    5.10
   7   4   0   14.90    6.30
   7   4   0    9.90    4.70
   7   4   0    9.30    3.80
  -8  -4   0  253.37   15.30
  -8  -4   0  241.08   17.90
  -8  -4   0  271.27   14.20
   8   4   0  237.88   16.10
   8   4   0  239.08   13.70
   8   4   0  275.77   18.90
  -9  -4   0   66.19    9.90
  -9  -4   0   63.59   12.40
  -9  -4   0   68.79    8.90
   9   4   0   76.79   12.80
   9   4   0   54.59    7.80
   9   4   0   61.39    9.90
 -10  -4   0   66.09   14.30
 -10  -4   0   89.89   10.60
 -10  -4   0   84.79   11.40
  10   4   0   88.99    9.20
  10   4   0   85.69   12.10
 -11  -4   0   -0.10    7.90
 -11  -4   0    9.80    6.40
 -11  -4   0   -2.70    6.10
  11   4   0    1.60    4.70
  11   4   0   -5.20    6.00
  10  -5   0   46.70   11.90
 -10   5   0   26.70    7.80
 -10   5   0   50.59   11.70
 -10   5   0   43.80   11.50
 -10   5   0   26.80   10.00
   9  -5   0  164.68   16.30
   9  -5   0  156.08   16.10
  -9   5   0  142.19   12.90
  -9   5   0  152.78   16.00
  -9   5   0  142.49   16.30
  -9   5   0  126.49   15.10
   8  -5   0   32.70    9.20
   8  -5   0   11.50    6.90
  -8   5   0   14.20    5.90
  -8   5   0   26.50    8.30
  -8   5   0   11.20    7.20
  -8   5   0   11.40    6.10
   7  -5   0   88.79   10.80
   7  -5   0   83.59   11.40
  -7   5   0   65.99   11.20
  -7   5   0   74.79    8.50
  -7   5   0   84.09   10.50
  -7   5   0   96.09   10.90
  -7   5   0   74.79   10.50
   6  -5   0  794.12   34.60
   6  -5   0  738.13   35.00
  -6   5   0  757.52   30.40
  -6   5   0  776.92   32.50
  -6   5   0  747.63   34.40
  -6   5   0  764.82   32.50
  -6   5   0  735.83   33.20
   5  -5   0  373.66   20.50
   5  -5   0  364.16   19.50
  -5   5   0  395.96   18.60
  -5   5   0  382.66   17.80
  -5   5   0  356.46   19.80
  -5   5   0  375.36   17.70
  -5   5   0  348.17   19.60
   4  -5   0  208.48   12.30
   4  -5   0  187.38   13.30
  -4   5   0  174.88   12.00
  -4   5   0  195.88    9.80
  -4   5   0  200.38   10.90
  -4   5   0  176.08   12.40
  -4   5   0  181.28   10.00
   3  -5   0  405.56   19.00
   3  -5   0  433.86   21.10
  -3   5   0  414.56   19.20
  -3   5   0  418.66   16.80
  -3   5   0  450.85   17.30
  -3   5   0  395.26   19.60
   2  -5   0  678.33   25.90
   2  -5   0  673.63   28.40
  -2   5   0  631.14   25.80
  -2   5   0  605.64   26.70
   1  -5   0  278.47   14.70
   1  -5   0  281.37   12.00
  -1   5   0  272.07   12.00
  -1   5   0  277.77   14.10
   0   5   0 2206.78   80.39
   0   5   0 2185.48   76.99
   1   5   0  265.57   10.80
   1   5   0  247.48   13.30
   2   5   0  442.06   17.40
   2   5   0  497.75   19.70
   2   5   0  479.25   19.00
   2   5   0  456.35   18.40
  -3  -5   0   50.29    4.90
   3   5   0   60.09    6.60
   3   5   0   67.99    6.30
   3   5   0   65.09    6.10
   3   5   0   52.99    4.60
  -4  -5   0  135.09    7.20
  -4  -5   0  117.19    7.90
  -4  -5   0  125.09    8.60
   4   5   0  123.79    9.60
   4   5   0  131.89    9.20
   4   5   0  136.59    7.60
   4   5   0  134.29   10.20
   4   5   0  124.29    8.00
  -5  -5   0   87.79    7.50
  -5  -5   0   93.99    8.40
  -5  -5   0   91.09    5.60
  -5  -5   0   77.69    7.40
   5   5   0   77.39    9.50
   5   5   0   79.79    8.10
   5   5   0   85.19    6.70
   5   5   0   82.89    7.30
  -6  -5   0   13.50    4.90
  -6  -5   0   14.30    5.00
  -6  -5   0   16.10    4.90
  -6  -5   0   21.30    4.40
   6   5   0   17.00    5.40
   6   5   0   12.20    4.50
   6   5   0   29.70    5.50
   6   5   0   12.40    5.50
  -7  -5   0   -2.80    2.90
  -7  -5   0    4.30    3.30
  -7  -5   0   -0.40    4.80
  -7  -5   0   -1.70    4.30
  -7  -5   0    0.70    4.80
   7   5   0   -1.70    3.70
   7   5   0    1.80    5.50
   7   5   0    4.60    3.60
   7   5   0    1.50    4.60
  -8  -5   0  134.69   10.40
  -8  -5   0  136.19   13.20
  -8  -5   0  126.99    9.50
   8   5   0  139.89   12.00
   8   5   0  124.99    9.90
   8   5   0  122.09   14.00
  -9  -5   0  141.49   11.80
  -9  -5   0  173.18   15.70
  -9  -5   0  139.59   10.80
   9   5   0  151.58   13.50
   9   5   0  151.38   11.20
   9   5   0  145.59   15.90
 -10  -5   0   26.40    7.10
 -10  -5   0   67.19   13.50
  10   5   0   36.70    8.00
  10   5   0   42.80    9.60
 -11  -5   0   36.30   10.20
 -11  -5   0   53.19   10.60
  11   5   0   24.40    6.40
  11   5   0   17.70    8.20
  10  -6   0   17.10   10.30
 -10   6   0    1.80    8.40
 -10   6   0    1.20    6.00
 -10   6   0   -4.50    8.10
   9  -6   0   55.49   13.40
   9  -6   0   58.49   12.80
  -9   6   0   59.79   13.20
  -9   6   0   50.29    9.90
  -9   6   0   42.20   10.80
   8  -6   0   13.10    8.60
   8  -6   0   29.10    8.40
  -8   6   0   40.50    9.70
  -8   6   0   22.40    7.60
  -8   6   0   16.10    5.60
  -8   6   0   18.00    7.60
   7  -6   0    7.20    6.20
   7  -6   0    0.10    7.10
  -7   6   0    4.50    6.70
  -7   6   0    1.70    4.20
  -7   6   0   10.50    6.00
  -7   6   0    4.80    6.70
  -7   6   0    0.00    5.30
   6  -6   0    1.70    5.20
   6  -6   0    1.80    6.40
  -6   6   0    6.60    4.90
  -6   6   0    1.80    4.40
  -6   6   0    2.50    4.40
  -6   6   0    2.70    5.90
   5  -6   0   23.50    7.30
   5  -6   0   26.00    6.30
  -5   6   0   16.10    4.50
  -5   6   0   19.20    4.70
  -5   6   0   31.30    6.80
  -5   6   0   31.00    7.50
  -5   6   0   14.90    5.70
   4  -6   0   30.00    6.20
   4  -6   0   34.40    8.20
  -4   6   0   32.40    5.60
  -4   6   0   39.10    7.80
  -4   6   0   31.50    4.90
  -4   6   0   35.40    4.40
  -4   6   0   32.60    6.80
   3  -6   0   64.69    6.60
   3  -6   0   56.29    8.40
  -3   6   0   48.50    6.40
  -3   6   0   56.29    4.70
  -3   6   0   55.29    7.40
  -3   6   0   43.60    4.20
   2  -6   0    3.50    4.40
   2  -6   0    0.50    2.40
  -2   6   0    5.20    3.70
  -2   6   0    2.30    2.60
   1  -6   0   73.29    8.30
  -1   6   0   72.49    6.60
  -1   6   0   68.19    5.20
   0   6   0   96.89    5.00
   1   6   0   43.50    6.50
   2   6   0  583.34   22.30
   2   6   0  638.04   24.70
   2   6   0  622.94   24.10
   2   6   0  595.44   23.20
   3   6   0   73.39    7.00
   3   6   0   94.59    7.50
   3   6   0   90.09    5.40
   3   6   0   89.09    7.90
  -4  -6   0   49.70    5.60
   4   6   0   50.99    5.10
   4   6   0   37.10    6.30
   4   6   0   46.20    5.00
   4   6   0   37.60    7.10
  -5  -6   0  215.78   12.50
  -5  -6   0  211.98   11.80
   5   6   0  203.68   11.70
   5   6   0  210.18   14.70
   5   6   0  216.98   11.20
   5   6   0  218.68   13.40
  -6  -6   0   47.90    7.70
  -6  -6   0   41.70    6.70
  -6  -6   0   44.70    6.80
  -6  -6   0   33.70    4.60
   6   6   0   36.90    8.40
   6   6   0   45.20    6.60
   6   6   0   41.10    6.30
   6   6   0   37.50    7.70
  -7  -6   0   -0.60    3.10
  -7  -6   0   -0.30    4.60
  -7  -6   0   -4.20    4.40
   7   6   0    3.40    3.90
   7   6   0   -4.40    5.40
   7   6   0   -2.90    3.70
  -8  -6   0  156.98   12.40
  -8  -6   0  175.88   13.70
   8   6   0  149.39   11.10
   8   6   0  167.48   12.80
   8   6   0  179.58   16.60
  -9  -6   0  218.28   16.70
   9   6   0  204.48   13.50
   9   6   0  211.78   15.60
   9   6   0  212.38   19.10
 -10  -6   0   88.99   13.50
  10   6   0   63.69    9.30
  10   6   0   87.09   11.90
  10   6   0   75.79   19.70
   9  -7   0   21.40    9.50
   9  -7   0    7.60    9.50
  -9   7   0   22.60    9.00
  -9   7   0   27.20   10.20
   8  -7   0   50.29   11.50
   8  -7   0   44.60   12.10
  -8   7   0   58.59   11.60
  -8   7   0   65.49   12.90
   7  -7   0   -1.70    7.40
   7  -7   0   -7.00    5.30
  -7   7   0    3.60    5.70
  -7   7   0    6.50    7.60
   6  -7   0  225.68   15.90
   6  -7   0  237.98   19.10
  -6   7   0  236.78   17.80
  -6   7   0  240.08   15.60
  -6   7   0  230.88   14.60
   5  -7   0   48.80   10.80
   5  -7   0   58.39    8.50
  -5   7   0   60.39    7.00
  -5   7   0   33.00    6.70
  -5   7   0   45.80    7.70
  -5   7   0   42.60    9.70
   4  -7   0    0.00    5.60
   4  -7   0    0.80    4.00
  -4   7   0    0.10    5.00
  -4   7   0    1.50    3.30
  -4   7   0    8.90    5.00
  -4   7   0   -0.90    2.60
   3  -7   0    4.10    5.40
   3  -7   0   -2.40    3.20
  -3   7   0   -3.80    3.20
  -3   7   0   -0.50    3.90
   2  -7   0  807.92   36.00
   2  -7   0  798.32   31.90
  -2   7   0  795.42   32.20
  -2   7   0  868.81   34.00
   1  -7   0  329.57   18.90
  -1   7   0  329.27   14.70
  -1   7   0  375.36   16.90
   0   7   0  259.47   12.90
   2   7   0   24.20    3.70
   2   7   0   24.10    4.90
   2   7   0   20.60    4.40
   3   7   0  272.87   13.80
   3   7   0  278.27   13.90
   3   7   0  260.67   14.50
   4   7   0  641.34   25.30
   4   7   0  675.23   29.20
   4   7   0  640.24   27.90
   5   7   0  189.48   10.70
   5   7   0  174.08   12.70
   5   7   0  175.78   14.20
   5   7   0  216.88   11.10
  -6  -7   0   17.90    4.70
   6   7   0   11.10    7.60
   6   7   0   19.40    4.70
   6   7   0   16.00    6.80
   6   7   0   14.40    4.40
  -7  -7   0   -2.90    5.90
  -7  -7   0    5.30    3.70
   7   7   0   -1.10    3.70
   7   7   0   -6.90    5.50
   7   7   0   -2.40    3.60
  -8  -7   0  116.89   10.30
   8   7   0  112.49   14.60
   8   7   0  122.89   11.10
   8   7   0   94.49    9.60
  -9  -7   0  171.68   13.60
   9   7   0  189.48   18.50
   9   7   0  164.28   13.90
   9   7   0  161.08   12.40
 -10  -7   0  115.19   13.00
  10   7   0   87.69   10.70
  10   7   0  126.19   17.20
   8  -8   0   84.29   16.10
   8  -8   0   86.19   13.10
  -8   8   0   49.90   12.10
  -8   8   0   75.89   12.90
   7  -8   0   42.10   11.70
   7  -8   0   27.10    8.30
  -7   8   0   19.80    9.10
  -7   8   0   49.99    9.70
   6  -8   0   17.80    6.70
   6  -8   0   15.90    8.90
  -6   8   0    7.90    7.50
  -6   8   0   13.70    5.70
  -6   8   0   20.00    6.40
   5  -8   0   62.59   12.40
   5  -8   0   52.29    8.90
  -5   8   0   57.29    8.60
  -5   8   0   40.50    9.10
  -5   8   0   39.90    7.30
   4  -8   0   51.39   11.50
   4  -8   0   53.29    7.70
  -4   8   0   46.10    8.00
  -4   8   0   61.99    6.90
  -4   8   0   60.39    6.30
  -4   8   0   66.59   10.60
   3  -8   0  100.79   12.40
   3  -8   0   83.49    8.00
  -3   8   0   77.09    8.00
  -3   8   0   83.69   10.20
   2  -8   0  897.31   40.30
  -2   8   0  902.21   35.20
  -2   8   0  890.91   37.10
   1  -8   0  236.78   15.70
  -1   8   0  217.68   12.60
  -1   8   0  190.88   10.00
   0   8   0  244.98   12.90
   1   8   0  820.02   31.50
   2   8   0    7.80    2.60
   2   8   0    8.80    2.80
   2   8   0    7.20    2.60
   2   8   0    8.30    3.50
   2   8   0    5.20    3.40
   3   8   0  145.09    9.90
   3   8   0  136.09   10.40
   4   8   0  140.29   11.80
   4   8   0  144.59   10.80
   4   8   0  133.69    6.90
   5   8   0   53.39   10.20
   5   8   0   38.40    6.10
   5   8   0   38.10    8.10
   5   8   0   46.90    5.30
   6   8   0   80.59   12.20
   6   8   0   93.39    7.90
   6   8   0   76.09    8.00
   7   8   0   70.79    8.40
   7   8   0   61.79   12.60
   8   8   0   24.60    6.30
   8   8   0   41.20   10.80
   9   8   0   56.79    9.20
   9   8   0   62.69   14.70
   7  -9   0  105.69   17.70
   7  -9   0   73.69   12.10
  -7   9   0  102.49   15.60
  -7   9   0  100.79   12.00
   6  -9   0   21.30    6.90
   6  -9   0   35.20   10.90
  -6   9   0   23.80    6.30
  -6   9   0   25.60    7.60
  -6   9   0   14.70    8.30
   5  -9   0  299.07   18.20
   5  -9   0  297.97   22.70
  -5   9   0  306.87   16.80
  -5   9   0  287.37   15.50
  -5   9   0  294.17   20.00
   4  -9   0  245.58   15.40
   4  -9   0  264.97   20.60
  -4   9   0  260.77   17.70
  -4   9   0  276.87   13.00
  -4   9   0  250.17   13.60
   3  -9   0  -11.00    6.20
  -3   9   0   -1.20    5.60
   2  -9   0   78.19   12.00
  -2   9   0   81.39    9.60
  -1   9   0   68.39    8.40
  -1   9   0   63.79    5.30
   0   9   0    9.90    4.10
   1   9   0   11.70    3.70
   2   9   0   56.59    6.70
   2   9   0   60.39    5.80
   2   9   0   67.19    7.40
   3   9   0   19.50    5.60
   3   9   0   24.10    5.30
   4   9   0    8.00    5.30
   4   9   0    3.70    4.70
   5   9   0    4.90    6.10
   5   9   0    1.90    3.50
   6   9   0   64.69   12.10
   6   9   0   50.69    7.50
   7   9   0    9.80    5.10
   7   9   0   16.10    8.20
   8   9   0   -4.50    4.90
   8   9   0    4.30    7.70
   6 -10   0    1.40   10.10
  -6  10   0    5.60    8.70
  -6  10   0   10.50    5.70
   5 -10   0   19.30   10.20
  -5  10   0   14.60    5.80
  -5  10   0   15.60    5.20
  -5  10   0   16.20    8.50
   4 -10   0    6.60    8.50
  -4  10   0   11.30    7.50
   3 -10   0    6.60    8.30
  -3  10   0    0.70    5.60
   2 -10   0   -1.60    6.90
  -2  10   0   -0.40    5.30
  -1  10   0   24.50    5.90
   0  10   0  147.99   10.50
   2  10   0   97.89    8.90
   2  10   0   94.69    8.30
   3  10   0  292.57   16.40
   3  10   0  256.47   15.00
   4  10   0   19.50    6.10
   4  10   0   22.80    7.30
   5  10   0   47.10    9.70
   6  10   0   30.90    8.80
   7  10   0   44.00   10.80
   5 -11   0    9.00   10.20
  -5  11   0    0.40    4.70
  -5  11   0   16.30    8.60
  -5  11   0   -2.80    5.20
   4 -11   0  189.58   20.50
  -4  11   0  213.78   17.50
   3 -11   0   66.49   14.60
  -3  11   0   86.19   12.10
  -2  11   0   89.69   11.10
  -1  11   0  156.58   12.30
   2  11   0  192.48   12.20
   2  11   0  157.78   11.10
   3  11   0   26.10    6.40
   3  11   0   40.00    9.30
   4  11   0   75.89   11.50
   5  11   0   -1.00    6.00
   6  11   0   21.90    8.40
  -3  12   0   75.49   14.40
   2  12   0    3.60    5.20
   2  12   0    2.50    4.70
   3  12   0   19.70    6.50
   4  12   0   52.59   11.50
   4  12  -1    9.90    7.20
   3  12  -1   24.30    7.20
   2  12  -1  204.58   13.00
   2  12  -1  202.18   13.90
   6  11  -1   32.70    9.50
   5  11  -1    8.70    7.70
   4  11  -1   38.60    8.90
   3  11  -1    9.30    5.80
   3  11  -1    2.00    4.90
   2  11  -1   27.10    6.00
   2  11  -1   28.60    6.90
  -2  11  -1   15.50    6.40
  -3  11  -1  110.49   13.00
   3 -11   1  110.39   16.30
  -4  11  -1   26.00    9.10
   4 -11   1   28.60   11.30
  -5  11  -1   -1.40    7.80
  -5  11  -1  -14.40    5.00
  -5  11  -1    6.70    5.00
   5 -11   1    8.20   10.60
   7  10  -1   57.59   13.70
   6  10  -1   79.59   13.60
   5  10  -1   27.50    8.20
   4  10  -1   79.59   11.20
   3  10  -1   18.40    5.40
   3  10  -1   23.90    6.10
   2  10  -1  237.88   12.90
   2  10  -1  219.78   13.50
   0  10  -1   52.39    7.00
  -1  10  -1  103.39    9.70
  -2  10  -1  205.98   14.40
   2 -10   1  227.98   18.30
  -3  10  -1  204.98   15.60
   3 -10   1  215.58   18.90
  -4  10  -1  226.68   17.10
   4 -10   1  205.78   19.80
  -5  10  -1   95.59    9.60
  -5  10  -1  113.99   14.10
  -5  10  -1   89.59   10.20
   5 -10   1  118.69   16.60
  -6  10  -1  160.38   17.70
  -6  10  -1  139.49   12.20
   6 -10   1  133.79   18.90
   8   9  -1  213.48   19.70
   8   9  -1  171.38   13.00
   7   9  -1   97.29    9.70
   7   9  -1  116.19   15.50
   6   9  -1   16.20    5.00
   6   9  -1   25.20    8.70
   5   9  -1  173.08   10.70
   5   9  -1  208.28   15.70
   4   9  -1   49.99    8.20
   4   9  -1   56.79    9.60
   3   9  -1  152.58   11.70
   3   9  -1  149.59   10.70
   2   9  -1  591.84   25.30
   2   9  -1  604.64   24.50
   2   9  -1  560.44   23.40
   1   9  -1  100.29    7.00
   0   9  -1  229.68   12.50
  -1   9  -1   14.90    5.10
  -2   9  -1   54.29    8.70
   2  -9   1   67.59   11.50
  -3   9  -1    6.60    5.50
   3  -9   1    1.80    7.00
  -4   9  -1  120.09    9.00
  -4   9  -1  123.09   13.00
  -4   9  -1  121.89    8.40
   4  -9   1   99.69   14.20
  -5   9  -1   50.49   10.40
  -5   9  -1   42.60    7.80
  -5   9  -1   53.99    8.40
   5  -9   1   59.49   12.70
   5  -9   1   38.90    9.00
  -6   9  -1   -6.90    5.30
  -6   9  -1   -0.30    5.00
  -6   9  -1    1.00    7.40
   6  -9   1    0.30    5.60
   6  -9   1   -2.20    8.00
  -7   9  -1   21.50    7.70
  -7   9  -1   27.60   10.00
   7  -9   1   16.60    8.00
   7  -9   1   27.20   11.40
   9   8  -1  113.89   11.10
   9   8  -1  103.99   16.40
   8   8  -1  243.08   15.00
   8   8  -1  255.67   21.00
   7   8  -1  219.78   13.40
   7   8  -1  245.08   19.20
   6   8  -1  105.19   13.50
   6   8  -1  111.69    9.00
   6   8  -1   95.99    8.90
   5   8  -1   21.20    5.10
   5   8  -1   28.00    7.40
   5   8  -1   32.70    7.60
   5   8  -1   25.70    4.80
   4   8  -1   -5.90    3.90
   4   8  -1    3.50    4.10
   4   8  -1    0.20    2.40
   3   8  -1  103.99    8.90
   3   8  -1  122.79   10.10
   2   8  -1  109.59    7.00
   2   8  -1  107.59    7.90
   2   8  -1  107.89    8.40
   1   8  -1   21.50    4.60
   1   8  -1   28.00    4.40
   0   8  -1    3.10    2.00
   0   8  -1    2.90    3.30
  -1   8  -1   40.90    4.90
  -1   8  -1   54.79    6.90
   1  -8   1   56.99    9.40
  -2   8  -1    4.90    4.50
  -2   8  -1   -2.00    3.10
   2  -8   1    4.30    5.60
  -3   8  -1    1.50    4.90
  -3   8  -1   12.60    4.40
   3  -8   1   10.00    6.80
  -4   8  -1    8.80    5.20
  -4   8  -1    0.70    5.30
  -4   8  -1    6.30    3.70
  -4   8  -1    6.00    3.60
   4  -8   1   14.40    5.10
   4  -8   1    2.70    6.90
  -5   8  -1  251.67   14.30
  -5   8  -1  275.27   15.20
  -5   8  -1  269.47   18.50
   5  -8   1  280.17   16.90
   5  -8   1  254.37   19.80
  -6   8  -1    4.70    7.10
  -6   8  -1    0.70    5.00
  -6   8  -1   -0.70    4.80
   6  -8   1   -0.30    5.00
   6  -8   1    2.30    8.30
  -7   8  -1    4.00    6.00
  -7   8  -1    9.30    7.90
   7  -8   1   -3.30    5.80
   7  -8   1    0.20    8.10
  -8   8  -1    0.80    7.10
  -8   8  -1    6.40    8.90
   8  -8   1    1.60    6.60
   8  -8   1   -5.50    8.20
  10   7  -1    4.90    5.40
  10   7  -1   -5.10    9.10
 -10  -7   1    2.60    6.10
   9   7  -1   -2.20    4.50
   9   7  -1    0.20    7.40
   9   7  -1    1.80    4.80
  -9  -7   1   -1.20    5.20
   8   7  -1  100.19   10.80
   8   7  -1  121.29   15.00
   8   7  -1  119.89   10.10
  -8  -7   1  100.19    9.90
   7   7  -1  186.68   16.90
   7   7  -1  166.78   11.40
   7   7  -1  195.58   13.10
  -7  -7   1  173.88   10.40
   6   7  -1    5.30    6.00
   6   7  -1   -3.80    3.50
   6   7  -1    1.40    3.80
   5   7  -1  683.83   30.80
   5   7  -1  643.24   29.00
   5   7  -1  619.24   26.10
   5   7  -1  655.13   26.90
   4   7  -1   24.20    4.40
   4   7  -1   20.40    4.60
   4   7  -1   26.10    6.50
   4   7  -1   15.60    5.20
   3   7  -1    2.50    2.20
   3   7  -1    4.50    3.60
   3   7  -1    3.00    3.70
   3   7  -1    4.70    3.30
   2   7  -1   24.00    4.70
   2   7  -1   23.80    5.10
   2   7  -1   15.70    3.70
   1   7  -1   50.09    4.60
   1   7  -1   53.39    4.50
   0   7  -1   87.39    6.80
   0   7  -1   99.49    5.60
  -1   7  -1   63.69    7.00
  -1   7  -1   74.69    5.70
   1  -7   1   67.79    8.90
  -2   7  -1   69.39    6.50
  -2   7  -1   66.29    7.60
   2  -7   1   80.19    9.60
  -3   7  -1   20.90    5.80
  -3   7  -1   20.70    4.80
   3  -7   1   23.30    5.00
   3  -7   1   16.40    6.80
  -4   7  -1  213.98   11.20
  -4   7  -1  185.98   10.50
  -4   7  -1  190.18   13.80
  -4   7  -1  179.78   13.00
   4  -7   1  204.98   12.90
   4  -7   1  182.68   15.20
  -5   7  -1   26.60    5.60
  -5   7  -1   19.70    4.90
  -5   7  -1   14.20    4.20
  -5   7  -1   12.30    6.80
   5  -7   1   23.60    8.50
   5  -7   1   15.60    5.60
  -6   7  -1  261.37   16.40
  -6   7  -1  288.37   19.10
  -6   7  -1  260.07   15.80
   6  -7   1  281.97   17.80
   6  -7   1  267.37   20.10
  -7   7  -1  206.18   15.20
  -7   7  -1  209.58   17.50
   7  -7   1  186.58   15.50
   7  -7   1  171.38   17.40
  -8   7  -1   29.30    8.70
  -8   7  -1   40.20   10.60
   8  -7   1   28.40   11.10
   8  -7   1   29.10    8.70
  -9   7  -1  318.17   24.20
  -9   7  -1  351.66   22.90
   9  -7   1  332.37   23.70
   9  -7   1  314.07   25.20
  10   6  -1   10.10    5.40
  10   6  -1   15.20    7.10
 -10  -6   1   35.60    9.00
   9   6  -1   36.30    8.10
   9   6  -1   62.29    9.90
   9   6  -1   53.89   11.80
  -9  -6   1   63.19   11.50
   8   6  -1  116.49   14.70
   8   6  -1  117.79   10.00
   8   6  -1  148.79   12.50
  -8  -6   1  129.89   12.20
   7   6  -1   49.99   10.80
   7   6  -1   35.60    7.20
   7   6  -1   41.70    6.80
  -7  -6   1   43.20    8.00
  -7  -6   1   49.70    5.30
  -7  -6   1   40.70    7.90
   6   6  -1   24.70    6.30
   6   6  -1   18.40    6.80
   6   6  -1   13.00    4.20
   6   6  -1   22.10    5.40
  -6  -6   1   14.30    4.10
  -6  -6   1   17.30    5.40
  -6  -6   1   13.30    4.90
   5   6  -1    4.40    3.40
   5   6  -1    0.10    3.70
   5   6  -1    1.40    3.10
   5   6  -1    0.70    4.50
  -5  -6   1    3.30    3.30
  -5  -6   1    1.60    3.60
   4   6  -1   32.20    7.00
   4   6  -1   32.10    4.60
   4   6  -1   40.30    6.50
   4   6  -1   44.40    5.20
  -4  -6   1   34.60    5.30
   3   6  -1   16.20    3.70
   3   6  -1   17.30    4.10
   3   6  -1   15.50    4.30
   3   6  -1   22.40    5.00
   2   6  -1  857.71   31.70
   2   6  -1  761.82   29.50
   2   6  -1  802.22   30.80
   2   6  -1  798.12   30.10
   2   6  -1  802.02   33.00
   1   6  -1   79.79    7.50
   1   6  -1   80.09    5.40
   1   6  -1   78.09    4.60
   1   6  -1   92.19    5.20
   1   6  -1   83.39    4.50
   1   6  -1   78.99    5.00
   0   6  -1  351.36   17.40
   0   6  -1  369.06   15.50
   0   6  -1  354.16   14.40
  -1   6  -1  352.16   15.20
  -1   6  -1  340.87   16.10
   1  -6   1  376.66   18.50
  -2   6  -1  371.66   18.10
  -2   6  -1  402.16   17.50
   2  -6   1  387.26   20.00
  -3   6  -1   68.69    6.80
  -3   6  -1   64.89    4.80
  -3   6  -1   69.99    5.10
  -3   6  -1   58.59    7.50
   3  -6   1   67.09    8.80
   3  -6   1   73.19    7.00
  -4   6  -1  586.74   23.90
  -4   6  -1  609.44   26.50
  -4   6  -1  573.34   23.50
  -4   6  -1  545.65   26.40
   4  -6   1  594.84   26.00
   4  -6   1  545.75   27.60
  -5   6  -1    8.60    5.70
  -5   6  -1    6.70    3.80
  -5   6  -1    8.40    4.20
  -5   6  -1    5.30    4.20
  -5   6  -1   16.00    6.10
   5  -6   1    4.30    4.30
   5  -6   1   18.30    7.00
  -6   6  -1  203.38   13.80
  -6   6  -1  218.98   15.80
  -6   6  -1  181.78   12.70
  -6   6  -1  222.18   13.60
   6  -6   1  157.48   15.30
   6  -6   1  163.78   14.00
  -7   6  -1  357.36   21.10
  -7   6  -1  277.07   17.70
  -7   6  -1  324.97   18.60
  -7   6  -1  284.27   20.30
  -7   6  -1  280.17   15.60
   7  -6   1  284.57   20.50
   7  -6   1  322.27   19.80
  -8   6  -1  283.77   20.60
  -8   6  -1  278.17   20.20
  -8   6  -1  289.57   19.30
  -8   6  -1  258.27   16.00
   8  -6   1  292.47   19.90
   8  -6   1  265.57   20.60
  -9   6  -1  188.68   17.50
  -9   6  -1  154.98   13.40
  -9   6  -1  165.08   17.80
   9  -6   1  163.78   17.80
   9  -6   1  176.38   17.00
 -10   6  -1   43.30   11.50
 -10   6  -1   35.80   10.50
 -10   6  -1   25.00    8.10
  10  -6   1   51.99   12.60
  11   5  -1   79.19   10.20
  11   5  -1   93.19   13.50
 -11  -5   1  141.79   16.80
 -11  -5   1   83.29   11.80
  10   5  -1  279.47   19.90
  10   5  -1  294.47   16.60
 -10  -5   1  305.37   21.70
 -10  -5   1  291.77   17.80
   9   5  -1   63.29   12.90
   9   5  -1   58.19   10.10
   9   5  -1   59.49    8.30
  -9  -5   1   77.89    8.60
  -9  -5   1   67.29   11.90
  -9  -5   1   61.99    9.00
   8   5  -1  254.97   16.50
   8   5  -1  257.57   19.40
   8   5  -1  244.18   13.80
  -8  -5   1  235.78   16.80
  -8  -5   1  237.88   14.10
  -8  -5   1  233.48   12.90
   7   5  -1  482.05   22.30
   7   5  -1  577.44   25.60
   7   5  -1  534.85   27.80
  -7  -5   1  522.45   21.20
  -7  -5   1  481.45   22.20
  -7  -5   1  507.45   24.90
  -7  -5   1  482.75   21.40
  -7  -5   1  559.44   26.20
   6   5  -1  236.78   12.20
   6   5  -1  233.58   14.60
   6   5  -1  229.28   13.80
   6   5  -1  212.98   15.90
  -6  -5   1  219.58   10.50
  -6  -5   1  227.48   14.50
  -6  -5   1  235.28   13.80
  -6  -5   1  215.48   13.50
   5   5  -1  239.48   12.90
   5   5  -1  251.67   11.80
   5   5  -1  215.98   14.70
   5   5  -1  213.88   13.50
  -5  -5   1  228.98   12.30
  -5  -5   1  226.88   12.80
  -5  -5   1  229.18   13.30
   4   5  -1  201.28    9.70
   4   5  -1  183.28   10.50
   4   5  -1  214.48   11.90
   4   5  -1  189.98   12.90
   4   5  -1  193.48   12.60
  -4  -5   1  187.38   10.40
  -4  -5   1  187.68    9.10
  -4  -5   1  190.88   10.90
   3   5  -1    1.50    2.20
   3   5  -1    3.00    3.10
   3   5  -1    3.20    3.20
   3   5  -1    3.20    2.10
   3   5  -1    2.10    2.80
  -3  -5   1    4.70    2.50
   2   5  -1  840.72   30.90
   2   5  -1  815.52   31.90
   2   5  -1  817.82   31.30
   2   5  -1  820.62   30.50
   1   5  -1  211.58    9.40
   1   5  -1  217.78    9.10
   1   5  -1  199.78    8.80
   1   5  -1  203.08   11.30
   0   5  -1  164.88    8.40
   0   5  -1  172.98    7.90
   0   5  -1  172.88   10.00
  -1   5  -1  356.36   15.40
  -1   5  -1  333.77   14.60
  -1   5  -1  348.27   16.20
   1  -5   1  349.27   17.00
  -2   5  -1  510.75   22.30
  -2   5  -1  509.25   21.60
  -2   5  -1  539.85   23.10
   2  -5   1  556.04   23.80
   2  -5   1  495.35   21.40
  -3   5  -1  191.08   11.50
  -3   5  -1  197.88    9.30
  -3   5  -1  189.08   12.00
  -3   5  -1  214.58    9.60
   3  -5   1  201.98   12.90
   3  -5   1  201.18   11.40
  -4   5  -1   34.30    6.90
  -4   5  -1   15.30    3.80
  -4   5  -1   19.00    4.90
  -4   5  -1   23.60    4.20
  -4   5  -1   25.60    5.10
   4  -5   1   18.90    4.80
   4  -5   1   13.80    5.50
  -5   5  -1   72.59    7.70
  -5   5  -1   82.79    9.40
  -5   5  -1   77.99    7.60
  -5   5  -1   92.49    9.70
  -5   5  -1   88.29    8.30
   5  -5   1   55.39    9.00
   5  -5   1   62.99    8.40
  -6   5  -1   43.60    9.40
  -6   5  -1   45.30    8.10
  -6   5  -1   51.89    8.50
  -6   5  -1   52.69    8.40
   6  -5   1   53.39    9.20
   6  -5   1   55.59    9.10
  -7   5  -1  255.67   16.50
  -7   5  -1  238.88   14.10
  -7   5  -1  265.77   17.30
  -7   5  -1  247.88   16.50
  -7   5  -1  271.67   18.30
   7  -5   1  257.07   18.20
   7  -5   1  269.27   17.80
  -8   5  -1  107.99   13.20
  -8   5  -1  111.39   13.80
  -8   5  -1  110.39   10.60
  -8   5  -1  117.49   13.30
   8  -5   1  102.89   13.00
   8  -5   1  106.89   13.40
  -9   5  -1   29.00    7.20
  -9   5  -1   28.10    8.80
  -9   5  -1   17.00    8.30
  -9   5  -1   10.40    8.10
   9  -5   1   16.30    8.10
   9  -5   1   26.00    9.60
 -10   5  -1    8.40    9.00
 -10   5  -1   -3.60    5.60
 -10   5  -1   11.20    8.30
 -10   5  -1    3.50    7.80
  10  -5   1   -2.20    7.90
  11   4  -1   38.70    9.80
  11   4  -1   41.10    8.30
 -11  -4   1   35.90    8.70
 -11  -4   1   44.90   11.10
  10   4  -1  259.97   18.70
  10   4  -1  251.17   15.20
 -10  -4   1  244.48   17.20
 -10  -4   1  271.57   20.60
 -10  -4   1  261.57   16.20
   9   4  -1   82.69    8.70
   9   4  -1   85.59   13.00
   9   4  -1   72.49   10.70
  -9  -4   1   74.29   10.20
  -9  -4   1   77.89   12.50
  -9  -4   1   90.89    9.40
   8   4  -1   64.09    9.30
   8   4  -1   54.29    7.30
   8   4  -1   46.20   10.90
  -8  -4   1   48.90    9.60
  -8  -4   1   62.19    7.70
  -8  -4   1   49.10    8.40
   7   4  -1  613.74   29.40
   7   4  -1  605.74   30.90
   7   4  -1  662.43   26.30
   7   4  -1  626.14   29.00
  -7  -4   1  596.34   26.80
  -7  -4   1  663.23   29.80
  -7  -4   1  607.74   25.70
   6   4  -1   16.90    5.90
   6   4  -1   27.60    6.60
   6   4  -1   29.90    6.00
   6   4  -1   20.80    4.10
  -6  -4   1   33.60    7.00
  -6  -4   1   20.80    4.40
  -6  -4   1   20.20    4.40
  -6  -4   1   26.50    6.10
  -6  -4   1   20.20    3.90
  -6  -4   1   23.10    5.40
   5   4  -1   16.40    3.70
   5   4  -1   13.10    4.90
   5   4  -1   15.80    4.40
   5   4  -1    8.90    3.50
  -5  -4   1   16.80    4.80
  -5  -4   1   10.40    3.30
  -5  -4   1   15.10    4.30
  -5  -4   1   17.20    3.70
  -5  -4   1   11.70    2.70
  -5  -4   1   14.00    4.50
   4   4  -1  281.97   14.70
   4   4  -1  293.87   15.40
   4   4  -1  310.77   16.00
   4   4  -1  300.27   12.90
   4   4  -1  296.37   14.10
  -4  -4   1  291.67   13.80
  -4  -4   1  271.57   11.40
  -4  -4   1  277.27   13.80
  -4  -4   1  298.77   14.60
   3   4  -1   13.50    3.70
   3   4  -1   18.30    3.30
   3   4  -1   21.80    4.00
   3   4  -1   16.60    4.10
   3   4  -1   11.00    2.80
   3   4  -1   14.40    3.60
  -3  -4   1   17.20    3.50
  -3  -4   1   12.80    3.20
  -3  -4   1   12.80    2.50
   2   4  -1   92.69    5.40
   2   4  -1   87.79    5.90
   2   4  -1   95.99    6.10
   2   4  -1   85.89    6.50
  -2  -4   1   87.39    5.30
  -2  -4   1   87.49    5.10
   1   4  -1   94.99    6.70
   1   4  -1  105.39    5.60
   1   4  -1   99.89    5.30
   0   4  -1    3.50    1.80
   0   4  -1    2.30    1.40
   0   4  -1    3.20    2.40
   0  -4   1    4.50    2.90
  -1   4  -1   52.49    4.30
  -1   4  -1   49.99    4.60
  -1   4  -1   57.59    5.20
   1  -4   1   47.00    5.60
  -2   4  -1  165.98    9.10
  -2   4  -1  161.88    9.40
  -2   4  -1  171.58    9.90
   2  -4   1  185.88   10.60
   2  -4   1  166.18    9.10
  -3   4  -1  140.69    9.10
  -3   4  -1  139.29    7.40
  -3   4  -1  139.89    9.60
  -3   4  -1  131.29    7.50
   3  -4   1  141.29    9.00
   3  -4   1  131.89    9.70
  -4   4  -1 1056.29   41.40
  -4   4  -1 1039.00   39.40
  -4   4  -1 1007.30   41.20
  -4   4  -1 1029.90   38.70
  -4   4  -1 1018.10   39.60
   4  -4   1 1019.60   41.50
   4  -4   1 1068.79   41.40
  -5   4  -1   -2.60    3.60
  -5   4  -1    1.40    3.40
  -5   4  -1   -2.80    2.50
  -5   4  -1   -2.40    3.00
  -5   4  -1   -1.10    3.40
  -5   4  -1    2.40    4.20
   5  -4   1   -0.60    3.60
   5  -4   1    1.70    3.50
   5  -4   1   -5.00    2.50
  -6   4  -1   -1.00    4.50
  -6   4  -1    0.10    3.80
  -6   4  -1    0.50    4.70
  -6   4  -1    3.80    4.30
  -6   4  -1   -3.40    3.00
   6  -4   1   -0.20    4.10
   6  -4   1    0.60    4.10
  -7   4  -1  390.86   22.90
  -7   4  -1  486.95   23.70
  -7   4  -1  449.46   21.10
  -7   4  -1  445.06   23.90
  -7   4  -1  500.15   24.80
   7  -4   1  425.96   23.60
   7  -4   1  475.15   24.90
  -8   4  -1   21.10    6.20
  -8   4  -1   36.40    8.70
  -8   4  -1   27.50    7.90
  -8   4  -1   32.50    8.20
   8  -4   1   27.70    7.60
   8  -4   1   23.70    7.60
  -9   4  -1    1.30    6.80
  -9   4  -1    4.00    7.00
  -9   4  -1    3.90    5.80
  -9   4  -1    0.30    6.00
   9  -4   1    6.40    6.70
   9  -4   1   -2.70    5.50
 -10   4  -1   -2.90    7.80
 -10   4  -1    4.40    5.90
 -10   4  -1   -1.30    7.50
 -10   4  -1   11.60    8.20
  10  -4   1    6.40    7.90
  10  -4   1    0.70    6.50
 -11   4  -1   -7.00    8.50
 -11   4  -1   14.00    9.50
 -11   4  -1    4.60    7.30
 -11   4  -1    6.70    9.20
  11  -4   1   16.40    9.20
  11   3  -1   81.39   13.40
  11   3  -1   62.09    8.80
 -11  -3   1   90.39   15.90
 -11  -3   1   80.39   12.60
 -11  -3   1   62.89   11.90
  10   3  -1    9.30    6.70
  10   3  -1    9.10    4.80
 -10  -3   1   10.40    8.30
 -10  -3   1    9.60    6.30
 -10  -3   1   12.20    6.40
   9   3  -1   94.99   13.30
   9   3  -1   99.19    8.90
   9   3  -1  117.79   12.20
  -9  -3   1   79.39   10.80
  -9  -3   1  103.89   14.20
  -9  -3   1   99.49   10.40
   8   3  -1   46.00   10.20
   8   3  -1   34.70    7.70
   8   3  -1   47.00    6.50
  -8  -3   1   40.10    8.20
  -8  -3   1   36.60    6.50
  -8  -3   1   34.20    8.20
  -8  -3   1   52.59   10.10
   7   3  -1   50.19    8.40
   7   3  -1   42.00    9.10
   7   3  -1   45.10    6.10
   7   3  -1   37.80    7.70
  -7  -3   1   31.40    6.30
  -7  -3   1   37.40    8.00
  -7  -3   1   58.69    7.00
  -7  -3   1   52.99    8.80
   6   3  -1    4.80    3.70
   6   3  -1    0.00    4.40
   6   3  -1    3.20    3.00
   6   3  -1    6.90    4.20
  -6  -3   1    3.00    4.40
  -6  -3   1    5.40    4.30
  -6  -3   1   -1.00    3.20
  -6  -3   1    6.10    4.10
  -6  -3   1    3.90    3.00
   5   3  -1    1.60    3.20
   5   3  -1    7.40    4.40
   5   3  -1    1.60    2.50
   5   3  -1    6.70    3.40
   5   3  -1    7.60    4.40
  -5  -3   1    3.30    2.40
  -5  -3   1    4.40    3.70
  -5  -3   1    1.70    3.10
  -5  -3   1   11.70    3.00
  -5  -3   1    4.30    2.60
  -5  -3   1    3.70    3.10
   4   3  -1  121.89    9.20
   4   3  -1  119.99    8.50
   4   3  -1  134.29    8.40
   4   3  -1  111.89    9.40
   4   3  -1  124.79    7.00
  -4  -3   1  132.49    8.70
  -4  -3   1  118.39    9.20
  -4  -3   1  115.59    6.30
  -4  -3   1  123.29    6.70
  -4  -3   1  116.49    7.20
  -4  -3   1  108.99    8.20
  -4  -3   1  114.19    8.10
   3   3  -1    5.70    3.10
   3   3  -1    3.00    3.00
   3   3  -1    2.20    2.40
   3   3  -1    1.80    1.90
   3   3  -1    5.60    2.70
   3   3  -1    0.80    2.20
  -3  -3   1    3.30    1.40
  -3  -3   1   -0.50    2.30
  -3  -3   1    5.30    2.80
  -3  -3   1    4.00    2.40
  -3  -3   1    4.40    2.90
   2   3  -1    7.60    2.80
   2   3  -1    0.80    1.50
   2   3  -1   -0.20    1.90
   2   3  -1    0.30    1.90
   2   3  -1   -0.90    1.60
   2   3  -1    2.50    2.30
  -2  -3   1    1.40    2.00
  -2  -3   1    0.10    1.70
  -2  -3   1    2.00    1.50
  -2  -3   1    4.40    2.10
   1   3  -1  656.43   23.70
   1   3  -1  669.33   24.50
   1   3  -1  669.63   24.80
   1   3  -1  664.33   24.30
   0   3  -1  965.90   36.20
   0   3  -1 1047.40   37.40
   0  -3   1 1016.60   37.50
  -1   3  -1  725.33   28.50
  -1   3  -1  772.72   28.90
  -1   3  -1  795.82   29.20
   1  -3   1  757.52   28.50
   1  -3   1  793.42   29.70
  -2   3  -1 1224.58   44.20
  -2   3  -1 1235.98   46.20
  -2   3  -1 1296.67   45.90
  -2   3  -1 1188.38   44.10
  -2   3  -1 1287.97   46.10
   2  -3   1 1215.68   45.80
   2  -3   1 1259.07   46.50
  -3   3  -1   44.10    4.60
  -3   3  -1   34.80    5.30
  -3   3  -1   47.60    4.60
  -3   3  -1   43.80    5.80
   3  -3   1   32.10    5.10
   3  -3   1   36.80    5.00
  -4   3  -1 1121.59   40.50
  -4   3  -1 1079.19   43.50
  -4   3  -1 1094.49   42.40
  -4   3  -1 1099.49   42.00
  -4   3  -1 1157.08   42.00
  -4   3  -1 1084.89   43.30
   4  -3   1 1138.59   40.80
   4  -3   1 1062.69   43.30
   4  -3   1 1139.89   43.40
  -5   3  -1  251.37   13.80
  -5   3  -1  230.98   13.20
  -5   3  -1  218.38   12.90
  -5   3  -1  253.37   11.90
  -5   3  -1  235.88   13.90
  -5   3  -1  233.08   14.20
   5  -3   1  220.38   11.70
   5  -3   1  240.68   13.70
   5  -3   1  250.27   14.30
  -6   3  -1  136.69   10.80
  -6   3  -1  124.59   10.90
  -6   3  -1  139.49   11.10
  -6   3  -1  139.29    9.30
  -6   3  -1  122.69   10.80
   6  -3   1  126.39    9.10
   6  -3   1  141.79   10.80
   6  -3   1  132.69   11.00
  -7   3  -1  165.28   13.40
  -7   3  -1  138.29   13.00
  -7   3  -1  158.38   11.20
  -7   3  -1  148.09   13.00
  -7   3  -1  154.48   13.10
   7  -3   1  170.08   13.60
   7  -3   1  151.88   12.10
   7  -3   1  179.28   11.40
  -8   3  -1   37.70    8.20
  -8   3  -1   55.69   10.40
  -8   3  -1   65.09   11.40
  -8   3  -1   54.59   11.00
   8  -3   1   48.50    9.30
   8  -3   1   62.59    9.90
  -9   3  -1   85.39   12.90
  -9   3  -1   94.29   13.60
  -9   3  -1   81.79   10.70
  -9   3  -1  103.09   13.60
   9  -3   1  107.29   12.90
   9  -3   1   79.79   11.60
 -10   3  -1   39.10   10.50
 -10   3  -1   41.10   10.30
 -10   3  -1   15.60    7.20
 -10   3  -1   41.60   10.00
  10  -3   1   36.30    9.60
  10  -3   1   32.20    9.00
 -11   3  -1    3.70    8.90
 -11   3  -1  -10.80    7.70
 -11   3  -1    0.50    6.90
 -11   3  -1    7.60    8.50
  11  -3   1    6.10    8.00
  11   2  -1   41.40   10.20
  11   2  -1   40.80    7.80
 -11  -2   1   49.99   11.80
 -11  -2   1   65.19   11.60
 -11  -2   1   45.00   11.60
  10   2  -1  175.58   11.40
  10   2  -1  157.28   15.00
 -10  -2   1  168.98   17.90
 -10  -2   1  158.28   14.10
 -10  -2   1  119.49   13.30
   9   2  -1    1.60    5.80
   9   2  -1    5.00    5.20
   9   2  -1    6.40    4.00
  -9  -2   1    6.00    9.90
  -9  -2   1    5.50    7.20
  -9  -2   1    0.30    5.50
  -9  -2   1    6.30    5.30
   8   2  -1   34.00    8.20
   8   2  -1   47.90    8.30
   8   2  -1   47.70    6.30
  -8  -2   1   48.20   11.10
  -8  -2   1   30.10    6.60
  -8  -2   1   61.79   10.00
  -8  -2   1   40.10    7.80
   7   2  -1    0.80    4.40
   7   2  -1    2.00    4.50
   7   2  -1   -1.80    2.50
   7   2  -1    4.10    4.00
  -7  -2   1    6.00    4.80
  -7  -2   1   -2.60    3.50
  -7  -2   1    4.80    5.30
  -7  -2   1   -0.70    3.60
   6   2  -1  604.94   28.60
   6   2  -1  632.74   27.70
   6   2  -1  586.94   24.50
   6   2  -1  654.83   27.90
  -6  -2   1  586.74   28.40
  -6  -2   1  592.84   25.30
  -6  -2   1  576.04   25.90
  -6  -2   1  589.54   28.10
  -6  -2   1  646.34   28.20
  -6  -2   1  617.64   27.80
   5   2  -1   24.30    5.70
   5   2  -1   26.00    6.40
   5   2  -1   23.80    5.40
   5   2  -1   15.70    4.70
   5   2  -1   25.90    4.10
  -5  -2   1   15.00    4.90
  -5  -2   1   25.60    5.00
  -5  -2   1   19.60    4.10
  -5  -2   1   21.40    4.60
  -5  -2   1   19.00    4.90
  -5  -2   1   29.60    6.50
  -5  -2   1   16.40    4.70
   4   2  -1  633.14   27.60
   4   2  -1  653.13   25.80
   4   2  -1  683.93   27.00
   4   2  -1  661.83   26.80
   4   2  -1  632.84   27.20
   4   2  -1  634.64   24.80
  -4  -2   1  644.44   27.10
  -4  -2   1  640.94   27.50
  -4  -2   1  639.24   26.80
  -4  -2   1  629.94   26.80
  -4  -2   1  666.63   25.00
  -4  -2   1  666.63   24.80
  -4  -2   1  617.54   25.50
   3   2  -1  392.56   17.10
   3   2  -1  405.86   18.00
   3   2  -1  401.26   17.20
   3   2  -1  393.86   15.70
   3   2  -1  388.06   16.40
   3   2  -1  384.86   17.50
  -3  -2   1  411.36   15.60
  -3  -2   1  390.76   16.20
  -3  -2   1  393.96   15.50
  -3  -2   1  413.96   17.40
  -3  -2   1  408.26   17.80
  -3  -2   1  386.06   16.90
   2   2  -1  522.95   20.80
   2   2  -1  538.55   20.60
   2   2  -1  535.45   21.00
   2   2  -1  530.05   19.60
   2   2  -1  525.05   21.40
   2   2  -1  529.35   20.10
  -2  -2   1  507.95   20.40
  -2  -2   1  545.95   19.10
  -2  -2   1  529.45   21.10
  -2  -2   1  538.05   19.80
  -2  -2   1  522.05   19.40
  -2  -2   1  508.85   20.50
  -2  -2   1  537.55   20.80
   1   2  -1  274.07   11.60
   1   2  -1  280.77   11.30
   1   2  -1  275.87   11.10
   1   2  -1  281.47   11.00
  -1  -2   1  279.07   11.20
  -1  -2   1  281.47   11.00
   0   2  -1   55.89    3.40
   0   2  -1   66.29    4.30
   0  -2   1   64.29    4.40
  -1   2  -1 1537.65   54.19
  -1   2  -1 1493.85   54.19
  -1   2  -1 1568.24   54.29
   1  -2   1 1457.95   54.09
   1  -2   1 1557.54   54.59
   1  -2   1 1503.85   54.29
  -2   2  -1 2102.49   75.69
  -2   2  -1 2132.39   74.59
  -2   2  -1 2022.60   75.59
  -2   2  -1 2112.69   74.59
   2  -2   1 2180.78   75.89
   2  -2   1 2135.89   75.69
   2  -2   1 2127.09   73.89
   2  -2   1 2098.19   75.49
   2  -2   1 2121.09   73.89
  -3   2  -1   40.00    5.30
  -3   2  -1   44.80    4.50
  -3   2  -1   30.90    4.30
  -3   2  -1   35.60    4.60
  -3   2  -1   39.70    4.90
  -3   2  -1   41.90    3.50
   3  -2   1   35.90    4.70
   3  -2   1   32.30    3.50
   3  -2   1   41.30    3.90
  -4   2  -1  639.54   24.40
  -4   2  -1  611.94   25.90
  -4   2  -1  622.04   23.60
  -4   2  -1  609.84   26.30
  -4   2  -1  674.53   25.90
  -4   2  -1  615.44   25.70
  -4   2  -1  614.84   26.60
   4  -2   1  655.83   26.90
   4  -2   1  641.14   25.20
   4  -2   1  620.34   24.80
  -5   2  -1  621.84   26.00
  -5   2  -1  606.64   26.90
  -5   2  -1  618.74   26.30
  -5   2  -1  605.34   24.40
  -5   2  -1  597.54   26.00
  -5   2  -1  544.55   25.90
   5  -2   1  600.34   25.10
   5  -2   1  613.14   26.90
  -6   2  -1  271.97   14.00
  -6   2  -1  245.48   15.10
  -6   2  -1  279.47   16.30
  -6   2  -1  273.97   15.50
  -6   2  -1  287.07   16.10
  -6   2  -1  253.87   15.70
   6  -2   1  250.17   15.60
   6  -2   1  259.27   14.30
  -7   2  -1  641.94   29.00
  -7   2  -1  560.64   28.30
  -7   2  -1  575.14   25.90
  -7   2  -1  601.34   27.80
  -7   2  -1  627.94   28.40
   7  -2   1  539.45   26.40
   7  -2   1  603.04   28.80
   7  -2   1  582.24   25.30
  -8   2  -1  239.78   15.40
  -8   2  -1  273.37   17.40
  -8   2  -1  249.38   17.70
  -8   2  -1  243.78   17.60
   8  -2   1  261.67   18.40
   8  -2   1  254.87   17.50
  -9   2  -1  113.89   14.10
  -9   2  -1  138.79   14.20
  -9   2  -1  130.79   14.40
  -9   2  -1  147.59   12.70
   9  -2   1  139.99   13.90
 -10   2  -1   58.59   12.50
 -10   2  -1   66.19   11.30
 -10   2  -1   56.09   13.50
 -10   2  -1   64.49   13.80
  10  -2   1   63.39   11.70
 -11   2  -1   32.20   10.60
 -11   2  -1   15.40    9.70
 -11   2  -1   18.40    9.60
 -11   2  -1   19.10    8.20
  11  -2   1   23.50    8.80
  11   1  -1  277.57   21.40
  11   1  -1  267.97   15.10
 -11  -1   1  294.77   20.10
 -11  -1   1  217.98   18.30
 -11  -1   1  273.97   23.70
  10   1  -1   85.59    8.60
  10   1  -1  115.09   13.20
 -10  -1   1   82.79   11.90
 -10  -1   1  102.79   15.90
 -10  -1   1   87.79   12.40
   9   1  -1   76.69    7.70
   9   1  -1   67.49   10.60
  -9  -1   1   93.69   11.20
  -9  -1   1  100.79   14.00
  -9  -1   1  106.19   13.10
  -9  -1   1  117.99   11.50
   8   1  -1   24.20    4.80
   8   1  -1   17.60    6.10
   8   1  -1   18.10    6.50
  -8  -1   1   19.60    7.20
  -8  -1   1   19.40    5.70
  -8  -1   1   35.00    8.80
  -8  -1   1   11.70    5.50
  -8  -1   1   27.30    7.40
   7   1  -1  219.78   11.40
   7   1  -1  215.08   15.10
   7   1  -1  255.27   18.40
   7   1  -1  206.08   14.30
  -7  -1   1  212.08   13.40
  -7  -1   1  215.08   15.10
  -7  -1   1  220.08   13.30
  -7  -1   1  201.28   15.50
  -7  -1   1  214.78   15.60
   6   1  -1    6.80    2.80
   6   1  -1    3.50    3.60
   6   1  -1    6.90    4.40
   6   1  -1   10.10    4.20
   6   1  -1    7.10    4.40
  -6  -1   1   -0.50    3.30
  -6  -1   1    2.70    4.10
  -6  -1   1    7.90    3.70
  -6  -1   1    2.80    4.00
  -6  -1   1    4.20    4.60
  -6  -1   1    8.90    4.70
   5   1  -1    2.10    3.10
   5   1  -1   -2.40    3.20
   5   1  -1    3.50    3.40
   5   1  -1    2.00    3.50
   5   1  -1    7.80    2.70
  -5  -1   1    0.40    3.10
  -5  -1   1    2.50    3.80
  -5  -1   1    4.20    3.90
  -5  -1   1    4.10    3.00
  -5  -1   1    0.10    3.30
  -5  -1   1   -1.50    2.80
   4   1  -1 1547.25   57.89
   4   1  -1 1548.95   56.39
   4   1  -1 1537.95   58.39
   4   1  -1 1497.75   55.39
   4   1  -1 1559.94   57.89
   4   1  -1 1507.15   57.39
  -4  -1   1 1537.55   57.59
  -4  -1   1 1592.94   55.49
  -4  -1   1 1513.95   58.29
  -4  -1   1 1537.15   56.29
  -4  -1   1 1504.85   57.99
  -4  -1   1 1618.44   57.99
  -4  -1   1 1522.65   56.59
   3   1  -1  295.77   11.80
   3   1  -1  301.37   13.60
   3   1  -1  266.67   13.80
   3   1  -1  278.37   13.60
   3   1  -1  279.17   13.20
   3   1  -1  289.97   12.60
  -3  -1   1  285.37   13.80
  -3  -1   1  286.97   12.30
  -3  -1   1  282.47   11.70
  -3  -1   1  285.37   13.40
  -3  -1   1  308.77   13.60
  -3  -1   1  302.37   14.10
  -3  -1   1  270.87   12.50
   2   1  -1 8905.91  306.87
   2   1  -1 9186.28  307.77
   2   1  -1 8834.22  307.87
   2   1  -1 8888.01  307.37
   2   1  -1 8662.53  307.37
   2   1  -1 8776.82  306.97
  -2  -1   1 8776.02  307.47
  -2  -1   1 8704.43  307.37
  -2  -1   1 9113.09  307.47
  -2  -1   1 8686.43  307.77
  -2  -1   1 8846.01  306.37
  -2  -1   1 9008.10  306.27
  -2  -1   1 8684.23  306.77
   1   1  -1  297.17   11.60
   1   1  -1  309.27   11.50
   1   1  -1  296.87   11.50
   1   1  -1  281.87   11.80
   1   1  -1  280.17   11.10
   1   1  -1  292.97   10.80
  -1  -1   1  289.67   10.70
  -1  -1   1  291.67   11.40
  -1  -1   1  277.47   11.40
  -1  -1   1  295.57   11.00
  -1  -1   1  281.77   11.70
   0   1  -1  573.44   20.30
   0   1  -1  560.34   20.20
   0   1  -1  569.44   20.20
   0   1  -1  574.14   20.30
   0  -1   1  564.14   20.40
   0  -1   1  564.34   20.20
   0  -1   1  584.94   20.10
   0  -1   1  574.34   20.10
  -1   1  -1 1125.79   41.50
  -1   1  -1 1168.68   41.00
  -1   1  -1 1096.99   41.40
  -1   1  -1 1152.28   40.90
   1  -1   1 1145.79   41.50
   1  -1   1 1179.18   40.80
   1  -1   1 1189.58   41.50
   1  -1   1 1230.68   40.80
  -2   1  -1  641.04   24.60
  -2   1  -1  650.13   24.40
  -2   1  -1  672.43   23.80
  -2   1  -1  678.33   25.30
  -2   1  -1  639.44   24.70
  -2   1  -1  626.94   24.90
   2  -1   1  639.64   24.40
   2  -1   1  678.13   25.30
   2  -1   1  662.53   24.40
   2  -1   1  669.93   25.00
  -3   1  -1   74.59    6.00
  -3   1  -1   62.09    3.90
  -3   1  -1   71.79    5.80
  -3   1  -1   64.89    5.70
  -3   1  -1   70.99    4.70
  -3   1  -1   71.49    5.70
  -3   1  -1   70.39    5.60
   3  -1   1   70.59    5.10
   3  -1   1   61.89    3.70
   3  -1   1   70.39    4.90
   3  -1   1   65.59    5.20
   3  -1   1   60.99    5.60
   3  -1   1   55.99    5.50
   3  -1   1   70.79    4.10
  -4   1  -1    5.90    3.40
  -4   1  -1    4.60    2.70
  -4   1  -1    6.50    3.30
  -4   1  -1    1.00    2.90
  -4   1  -1    2.20    1.80
  -4   1  -1    1.70    2.80
  -4   1  -1    5.90    3.20
   4  -1   1    3.90    2.50
   4  -1   1    6.10    3.00
   4  -1   1    4.00    2.70
   4  -1   1    2.90    2.60
   4  -1   1    3.30    1.60
   4  -1   1    5.30    2.00
  -5   1  -1  292.27   16.00
  -5   1  -1  314.97   15.90
  -5   1  -1  321.57   16.40
  -5   1  -1  288.37   15.40
  -5   1  -1  287.97   16.00
  -5   1  -1  301.27   14.40
   5  -1   1  314.67   16.00
   5  -1   1  297.97   15.00
   5  -1   1  313.37   14.80
   5  -1   1  302.07   13.20
   5  -1   1  314.97   12.70
   5  -1   1  281.17   15.00
  -6   1  -1  394.96   20.70
  -6   1  -1  390.36   19.60
  -6   1  -1  436.56   20.70
  -6   1  -1  387.86   20.70
  -6   1  -1  388.06   20.70
  -6   1  -1  408.26   18.70
   6  -1   1  419.46   20.80
   6  -1   1  404.06   16.40
   6  -1   1  410.66   19.00
   6  -1   1  405.36   19.70
   6  -1   1  398.26   17.10
  -7   1  -1  281.37   17.00
  -7   1  -1  230.68   14.10
  -7   1  -1  259.97   15.40
  -7   1  -1  245.28   16.20
  -7   1  -1  248.18   16.10
   7  -1   1  254.17   11.60
   7  -1   1  214.58   14.50
   7  -1   1  253.67   12.30
   7  -1   1  259.67   16.00
   7  -1   1  221.08   13.70
  -8   1  -1  119.89   11.80
  -8   1  -1  103.29   12.20
  -8   1  -1  108.99   12.80
  -8   1  -1   87.39   10.00
  -8   1  -1   96.49   11.90
   8  -1   1  113.49   10.10
   8  -1   1  109.69   10.90
   8  -1   1  123.89    7.70
   8  -1   1  121.59   11.80
  -9   1  -1   49.80   11.70
  -9   1  -1   71.29   11.00
  -9   1  -1   47.20    9.40
  -9   1  -1   50.69   11.40
   9  -1   1   47.00    5.90
   9  -1   1   54.39    8.90
   9  -1   1   58.59   10.10
 -10   1  -1   10.50    7.60
 -10   1  -1   11.60    7.80
 -10   1  -1   14.70    8.60
 -10   1  -1   17.00    7.30
  10  -1   1    9.10    6.80
  10  -1   1   17.20    4.40
 -11   1  -1   35.50   10.00
 -11   1  -1   10.40    7.70
 -11   1  -1   29.90   10.50
  11  -1   1   14.80    4.80
  11   0  -1  117.19   10.10
 -11   0   1  143.89   16.10
 -11   0   1  128.89   14.70
 -11   0   1  154.28   19.20
  10   0  -1  129.09   13.80
  10   0  -1  116.69    9.20
 -10   0   1   96.09   13.30
 -10   0   1  123.49   13.20
 -10   0   1   94.19   15.60
 -10   0   1   99.89   14.10
   9   0  -1   91.59    7.70
   9   0  -1   59.19   10.40
  -9   0   1   81.69   10.70
  -9   0   1   89.39   13.40
  -9   0   1   77.99   10.80
  -9   0   1   65.89   11.80
   8   0  -1   29.00    7.10
   8   0  -1   17.10    6.20
   8   0  -1   33.00    5.40
  -8   0   1   30.60    8.30
  -8   0   1   25.30    7.40
  -8   0   1   21.90    7.70
  -8   0   1   16.00    6.10
  -8   0   1   21.80    6.10
   7   0  -1  499.25   24.90
   7   0  -1  486.35   23.90
   7   0  -1  451.95   24.20
   7   0  -1  486.85   20.30
  -7   0   1  503.45   23.50
  -7   0   1  499.05   25.50
  -7   0   1  469.95   24.50
  -7   0   1  498.65   23.10
  -7   0   1  489.25   25.40
   6   0  -1  124.39    9.70
   6   0  -1  110.09    9.70
   6   0  -1  102.49    9.70
   6   0  -1  129.79   10.40
   6   0  -1  120.49    7.20
  -6   0   1  110.49   10.90
  -6   0   1  115.29    9.30
  -6   0   1  109.89   10.60
  -6   0   1  124.79   10.30
  -6   0   1  123.89   10.40
  -6   0   1  113.79    9.10
   5   0  -1  497.65   20.60
   5   0  -1  472.55   19.40
   5   0  -1  499.25   22.30
   5   0  -1  494.15   22.70
   5   0  -1  471.85   21.70
   5   0  -1  485.95   22.60
  -5   0   1  463.15   21.40
  -5   0   1  500.55   23.10
  -5   0   1  497.45   22.70
  -5   0   1  507.95   21.30
  -5   0   1  498.55   22.30
  -5   0   1  485.55   23.10
   4   0  -1   56.89    5.60
   4   0  -1   46.70    5.80
   4   0  -1   64.69    4.30
   4   0  -1   56.49    6.30
   4   0  -1   44.20    6.00
   4   0  -1   56.19    5.00
  -4   0   1   49.40    6.00
  -4   0   1   43.90    4.10
  -4   0   1   48.80    6.00
  -4   0   1   53.19    6.50
  -4   0   1   50.99    5.50
  -4   0   1   39.40    5.30
  -4   0   1   42.40    6.60
   3   0  -1   -0.90    1.40
   3   0  -1   -0.40    2.00
   3   0  -1   -1.50    2.30
   3   0  -1    5.70    2.90
   3   0  -1    4.90    2.10
   3   0  -1    2.10    2.70
  -3   0   1   -1.10    2.10
  -3   0   1    0.30    2.60
  -3   0   1    2.00    1.50
  -3   0   1    1.50    2.40
  -3   0   1   -1.00    2.10
  -3   0   1    5.40    3.40
  -3   0   1    4.40    2.70
   2   0  -1   11.50    3.20
   2   0  -1    9.80    2.20
   2   0  -1   11.60    2.60
   2   0  -1   11.80    1.90
   2   0  -1    3.40    2.80
   2   0  -1   10.50    2.70
  -2   0   1    7.20    2.60
  -2   0   1    8.00    2.80
  -2   0   1   10.30    3.30
  -2   0   1    7.10    1.70
  -2   0   1    2.20    2.70
  -2   0   1    4.40    2.40
   1   0  -1    4.90    1.50
   1   0  -1    8.80    1.80
   1   0  -1    7.90    1.50
   1   0  -1    6.90    1.90
   1   0  -1    6.50    1.30
   1   0  -1    8.30    1.90
  -1   0   1    8.40    1.80
  -1   0   1    6.40    1.70
  -1   0   1    7.10    1.20
  -1   0   1    5.80    1.50
  -1   0   1    5.60    1.60
  -1   0   1    7.70    1.80
   0   0  -1   21.10    1.70
   0   0  -1   20.60    1.60
   0   0  -1   22.30    1.30
   0   0   1   22.30    1.50
   0   0   1   25.30    2.20
   0   0   1   20.90    1.30
   0   0   1   22.00    1.50
  -1   0  -1  338.47   12.40
  -1   0  -1  319.37   12.80
  -1   0  -1  339.27   12.70
  -1   0  -1  334.77   12.80
  -1   0  -1  340.37   12.60
  -1   0  -1  337.57   12.30
   1   0   1  345.27   12.30
   1   0   1  331.67   12.60
   1   0   1  344.47   12.80
   1   0   1  328.07   12.70
   1   0   1  329.37   12.20
   1   0   1  340.37   12.80
   1   0   1  352.46   12.90
  -2   0  -1 1566.84   54.89
  -2   0  -1 1566.74   55.99
  -2   0  -1 1529.25   55.59
  -2   0  -1 1511.15   56.09
  -2   0  -1 1527.95   55.89
  -2   0  -1 1579.34   55.29
  -2   0  -1 1590.64   56.09
   2   0   1 1550.34   54.79
   2   0   1 1594.14   55.69
   2   0   1 1604.24   55.89
   2   0   1 1534.95   55.99
   2   0   1 1529.05   55.99
   2   0   1 1592.84   55.19
   2   0   1 1571.14   55.79
  -3   0  -1   23.40    4.60
  -3   0  -1   23.60    5.00
  -3   0  -1   21.40    2.90
  -3   0  -1   21.40    3.80
  -3   0  -1   33.80    4.90
  -3   0  -1   17.20    3.60
  -3   0  -1   19.30    3.90
   3   0   1   35.10    4.50
   3   0   1   20.40    4.00
   3   0   1   20.50    3.80
   3   0   1   27.20    3.90
   3   0   1   26.30    3.00
   3   0   1   27.10    4.40
   3   0   1   27.30    3.30
  -4   0  -1  453.45   20.10
  -4   0  -1  435.76   19.60
  -4   0  -1  441.56   19.60
  -4   0  -1  449.66   18.50
  -4   0  -1  445.16   18.90
  -4   0  -1  457.55   17.70
  -4   0  -1  468.45   20.10
   4   0   1  433.56   17.90
   4   0   1  442.56   19.20
   4   0   1  445.06   19.60
   4   0   1  434.16   17.30
   4   0   1  424.56   19.00
   4   0   1  425.86   19.50
  -5   0  -1  244.18   14.30
  -5   0  -1  237.28   14.00
  -5   0  -1  251.77   13.70
  -5   0  -1  230.88   12.30
  -5   0  -1  241.38   12.80
  -5   0  -1  242.68   13.70
   5   0   1  242.18   11.60
   5   0   1  242.48   13.10
   5   0   1  238.48   13.50
   5   0   1  224.98   12.80
   5   0   1  222.18   13.20
   5   0   1  243.88   10.80
  -6   0  -1   28.70    7.00
  -6   0  -1   20.50    5.70
  -6   0  -1   18.70    5.50
  -6   0  -1   22.10    5.30
  -6   0  -1   40.90    7.90
  -6   0  -1   28.60    6.10
   6   0   1   27.60    5.40
   6   0   1   25.20    6.00
   6   0   1   29.80    6.30
   6   0   1   30.90    6.30
   6   0   1   42.00    6.60
   6   0   1   22.30    3.80
  -7   0  -1   16.40    5.80
  -7   0  -1   13.00    4.80
  -7   0  -1   -1.20    4.00
  -7   0  -1    5.00    5.40
  -7   0  -1    8.20    4.80
   7   0   1    8.10    4.50
   7   0   1   14.90    5.20
   7   0   1   10.40    3.10
   7   0   1   10.00    4.80
  -8   0  -1   36.50    8.30
  -8   0  -1   25.20    7.30
  -8   0  -1   24.80    7.00
  -8   0  -1   32.30    8.50
  -8   0  -1   16.10    5.70
   8   0   1   31.90    7.10
   8   0   1   24.60    6.60
   8   0   1   30.20    5.10
  -9   0  -1   18.70    8.00
  -9   0  -1   14.20    6.60
  -9   0  -1   12.00    7.10
  -9   0  -1    8.90    6.10
   9   0   1   10.60    6.60
   9   0   1   13.20    4.00
 -10   0  -1  282.17   21.30
 -10   0  -1  281.67   18.90
 -10   0  -1  319.77   20.50
 -10   0  -1  279.47   22.20
  10   0   1  296.37   15.00
  10   0   1  286.77   20.50
 -11   0  -1   45.70   12.10
 -11   0  -1   24.00    9.10
 -11   0  -1   41.10    9.20
  11   0   1   36.20    7.00
  11   0   1   44.80   10.70
 -11   1   1   -1.10    6.90
 -11   1   1   18.10    8.80
 -11   1   1   13.30    9.50
  10  -1  -1   66.79   11.40
  10  -1  -1   57.29    7.10
 -10   1   1   58.69   12.00
 -10   1   1   65.89   13.50
 -10   1   1   61.99   13.80
 -10   1   1   55.89   11.00
   9  -1  -1   11.40    6.30
   9  -1  -1    9.20    3.70
  -9   1   1   12.10    6.60
  -9   1   1    8.80    7.00
  -9   1   1    5.50    5.70
  -9   1   1   -3.00    6.40
   8  -1  -1  234.68   14.90
   8  -1  -1  217.68   15.90
   8  -1  -1  224.88   11.40
  -8   1   1  176.88   16.60
  -8   1   1  217.68   15.40
  -8   1   1  200.38   14.20
  -8   1   1  223.08   16.40
  -8   1   1  219.88   17.10
   7  -1  -1  101.99    9.40
   7  -1  -1  100.19    6.80
   7  -1  -1   94.69   10.00
  -7   1   1   96.59   10.40
  -7   1   1   94.59   10.00
  -7   1   1   93.19   10.90
  -7   1   1   96.49   11.20
  -7   1   1   94.99    9.30
   6  -1  -1    3.80    2.20
   6  -1  -1    4.80    2.80
   6  -1  -1    0.60    3.50
   6  -1  -1    0.20    1.50
   6  -1  -1    1.70    3.50
  -6   1   1    5.20    4.00
  -6   1   1    1.50    3.60
  -6   1   1    4.30    4.60
  -6   1   1    7.60    5.20
  -6   1   1    3.90    4.40
  -6   1   1    2.30    3.80
   5  -1  -1  200.18    9.70
   5  -1  -1  236.28   12.50
   5  -1  -1  240.38   13.50
   5  -1  -1  212.98   10.60
   5  -1  -1  213.68   12.00
  -5   1   1  182.78   12.80
  -5   1   1  184.48   12.80
  -5   1   1  229.78   12.80
  -5   1   1  225.48   11.80
  -5   1   1  227.58   13.40
  -5   1   1  256.27   13.30
   4  -1  -1   59.69    4.10
   4  -1  -1   64.09    6.10
   4  -1  -1   56.39    5.50
   4  -1  -1   56.29    4.60
   4  -1  -1   51.69    6.10
  -4   1   1   50.09    6.70
  -4   1   1   61.69    5.70
  -4   1   1   55.69    6.50
  -4   1   1   59.89    6.40
  -4   1   1   47.70    4.10
  -4   1   1   58.79    6.30
  -4   1   1   56.09    5.90
   3  -1  -1   68.39    5.80
   3  -1  -1   72.09    5.60
   3  -1  -1   84.19    4.80
   3  -1  -1   83.69    6.40
   3  -1  -1   74.19    5.50
   3  -1  -1   79.09    4.30
  -3   1   1   80.19    6.40
  -3   1   1   72.69    4.30
  -3   1   1   86.99    6.60
  -3   1   1   73.19    5.80
  -3   1   1   80.99    6.60
  -3   1   1   87.49    5.70
   2  -1  -1 1320.57   49.10
   2  -1  -1 1384.56   48.80
   2  -1  -1 1371.06   49.60
   2  -1  -1 1331.37   48.70
   2  -1  -1 1313.27   49.00
   2  -1  -1 1391.16   48.10
  -2   1   1 1383.16   48.40
  -2   1   1 1368.06   47.80
  -2   1   1 1324.27   48.80
  -2   1   1 1425.76   49.70
  -2   1   1 1394.86   49.20
  -2   1   1 1286.87   49.20
   1  -1  -1   12.70    1.90
   1  -1  -1   11.00    2.40
   1  -1  -1   12.40    2.10
   1  -1  -1   13.70    2.30
   1  -1  -1   18.50    2.80
  -1   1   1   12.50    2.30
  -1   1   1   12.40    2.30
  -1   1   1   16.80    2.40
  -1   1   1   10.10    2.50
  -1   1   1   11.90    2.10
   0  -1  -1 2283.27   80.19
   0  -1  -1 2274.77   79.39
   0  -1  -1 2240.18   79.39
   0  -1  -1 2301.57   79.29
   0   1   1 2281.07   79.49
   0   1   1 2339.37   80.19
   0   1   1 2307.67   79.39
  -1  -1  -1  653.03   22.90
  -1  -1  -1  641.84   23.50
  -1  -1  -1  645.54   23.60
  -1  -1  -1  647.84   23.10
  -1  -1  -1  646.64   23.10
  -1  -1  -1  622.34   23.20
   1   1   1  634.44   23.10
   1   1   1  674.93   23.60
   1   1   1  649.34   23.10
   1   1   1  628.64   23.20
   1   1   1  653.63   23.60
   1   1   1  645.64   23.70
   1   1   1  651.33   23.00
  -2  -1  -1  153.68    8.20
  -2  -1  -1  152.98    7.40
  -2  -1  -1  157.98    8.40
  -2  -1  -1  155.88    7.60
  -2  -1  -1  154.08    7.10
  -2  -1  -1  150.98    6.80
  -2  -1  -1  161.78    8.00
   2   1   1  153.58    6.90
   2   1   1  148.49    7.00
   2   1   1  141.29    7.70
   2   1   1  158.58    7.20
   2   1   1  150.38    8.20
   2   1   1  149.88    7.40
   2   1   1  154.68    8.10
  -3  -1  -1  297.87   12.40
  -3  -1  -1  258.27   13.20
  -3  -1  -1  274.97   13.40
  -3  -1  -1  281.47   12.90
  -3  -1  -1  274.87   12.10
  -3  -1  -1  272.47   13.00
  -3  -1  -1  286.67   11.60
   3   1   1  284.27   13.20
   3   1   1  277.07   12.80
   3   1   1  247.38   13.00
   3   1   1  277.27   12.10
   3   1   1  285.87   11.50
   3   1   1  295.27   12.90
   3   1   1  289.67   12.10
  -4  -1  -1  490.85   22.00
  -4  -1  -1  512.55   22.60
  -4  -1  -1  538.05   22.30
  -4  -1  -1  537.05   22.70
  -4  -1  -1  523.85   21.10
  -4  -1  -1  529.55   21.20
  -4  -1  -1  521.75   20.30
   4   1   1  537.25   22.20
   4   1   1  525.35   21.20
   4   1   1  483.95   22.20
   4   1   1  488.85   20.70
   4   1   1  528.15   20.10
   4   1   1  488.75   21.70
   4   1   1  516.45   22.30
  -5  -1  -1 1112.79   44.00
  -5  -1  -1 1100.99   42.00
  -5  -1  -1 1121.39   43.60
  -5  -1  -1 1137.19   44.00
  -5  -1  -1 1003.30   42.90
  -5  -1  -1 1127.19   42.00
   5   1   1 1064.79   43.10
   5   1   1 1117.39   43.80
   5   1   1 1117.69   43.10
   5   1   1 1092.99   40.60
   5   1   1 1058.59   41.50
   5   1   1 1120.09   43.40
  -6  -1  -1   85.29    9.50
  -6  -1  -1  111.89    9.60
  -6  -1  -1   95.09    8.30
  -6  -1  -1   90.89    9.10
  -6  -1  -1   79.59    8.00
  -6  -1  -1   81.19    9.90
   6   1   1   85.29    9.30
   6   1   1  100.99    6.60
   6   1   1  110.79    9.40
   6   1   1   84.29    8.50
   6   1   1  109.39    9.20
  -7  -1  -1  440.16   23.60
  -7  -1  -1  403.76   20.90
  -7  -1  -1  457.95   23.90
  -7  -1  -1  446.16   23.00
  -7  -1  -1  426.06   21.10
   7   1   1  424.86   22.80
   7   1   1  447.86   22.60
   7   1   1  455.15   19.00
   7   1   1  511.65   29.60
  -8  -1  -1  179.78   15.40
  -8  -1  -1  146.99   12.10
  -8  -1  -1  165.28   14.40
  -8  -1  -1  147.49   14.10
  -8  -1  -1  182.18   13.30
   8   1   1  156.28    9.80
   8   1   1  180.68   13.70
   8   1   1  181.88   14.30
  -9  -1  -1   34.10    9.20
  -9  -1  -1   32.50    8.60
  -9  -1  -1   30.10    7.50
  -9  -1  -1   31.40    7.10
   9   1   1   27.80    7.30
   9   1   1   27.90    5.10
 -10  -1  -1  222.98   17.10
 -10  -1  -1  228.68   17.10
 -10  -1  -1  271.07   21.20
  10   1   1  228.38   13.50
  10   1   1  302.37   19.80
 -11  -1  -1  153.98   18.90
 -11  -1  -1  152.88   15.20
 -11  -1  -1  137.59   14.80
  11   1   1  121.69   10.20
  11   1   1  111.29   14.30
  11  -2  -1   72.09   13.30
 -11   2   1   88.99   13.30
 -11   2   1   67.49   15.00
 -11   2   1  101.89   16.70
 -11   2   1  116.39   16.30
  10  -2  -1   11.50    7.40
  10  -2  -1   20.10    8.00
 -10   2   1   14.70    8.80
 -10   2   1   18.20    9.00
 -10   2   1   13.10    6.90
 -10   2   1   18.90    8.00
   9  -2  -1   18.50    6.90
   9  -2  -1   17.20    7.00
  -9   2   1    4.30    5.50
  -9   2   1   16.90    7.90
  -9   2   1    6.10    7.30
  -9   2   1    1.80    5.90
   8  -2  -1  271.17   14.60
   8  -2  -1  286.27   16.00
   8  -2  -1  304.17   19.30
  -8   2   1  309.77   19.20
  -8   2   1  302.37   18.70
  -8   2   1  281.77   16.90
  -8   2   1  262.97   19.10
   7  -2  -1  638.54   28.90
   7  -2  -1  570.44   23.00
   7  -2  -1  553.14   26.60
   7  -2  -1  609.54   25.70
  -7   2   1  553.94   28.00
  -7   2   1  582.34   27.50
  -7   2   1  535.25   27.90
  -7   2   1  553.64   27.20
  -7   2   1  557.04   25.60
   6  -2  -1  444.96   20.20
   6  -2  -1  447.96   22.60
   6  -2  -1  480.15   21.70
  -6   2   1  429.06   21.60
  -6   2   1  440.86   22.50
  -6   2   1  428.66   22.40
  -6   2   1  477.35   25.80
  -6   2   1  462.15   20.60
  -6   2   1  450.15   22.10
   5  -2  -1    4.80    3.60
   5  -2  -1    2.10    2.80
   5  -2  -1    2.60    3.00
  -5   2   1    2.20    3.80
  -5   2   1    9.80    3.80
  -5   2   1    2.10    3.90
  -5   2   1    4.10    3.40
  -5   2   1   10.90    4.30
  -5   2   1    5.90    3.70
   4  -2  -1  146.09    9.20
   4  -2  -1  172.98    8.80
   4  -2  -1  183.28   10.80
   4  -2  -1  168.88    9.90
   4  -2  -1  162.58    9.00
  -4   2   1  135.59    9.80
  -4   2   1  160.68   10.30
  -4   2   1  171.68   10.60
  -4   2   1  171.88    8.80
  -4   2   1  147.59    7.60
  -4   2   1  177.18    9.80
  -4   2   1  167.58   10.60
   3  -2  -1   97.89    5.60
   3  -2  -1  100.69    5.80
   3  -2  -1  115.49    7.20
   3  -2  -1   97.09    7.10
   3  -2  -1   87.39    6.10
  -3   2   1   95.09    7.10
  -3   2   1  100.99    6.30
  -3   2   1  105.49    6.90
  -3   2   1   93.29    5.70
  -3   2   1   96.09    6.90
  -3   2   1   89.79    4.70
   2  -2  -1 1194.38   42.90
   2  -2  -1 1176.58   42.60
   2  -2  -1 1206.68   44.30
   2  -2  -1 1132.09   44.00
  -2   2   1 1192.88   43.00
  -2   2   1 1202.38   43.50
  -2   2   1 1220.68   43.90
  -2   2   1 1222.28   43.00
  -2   2   1 1204.18   44.10
   1  -2  -1  651.53   24.70
   1  -2  -1  687.83   25.70
  -1   2   1  704.33   23.90
  -1   2   1  681.43   25.40
  -1   2   1  586.44   24.50
  -1   2   1  677.83   23.70
   0  -2  -1 1379.36   50.69
   0  -2  -1 1527.45   52.49
   0   2   1 1527.65   52.39
   0   2   1 1403.66   50.69
  -1  -2  -1  325.67   12.60
  -1  -2  -1  322.47   12.50
  -1  -2  -1  316.67   12.00
  -1  -2  -1  326.97   12.50
   1   2   1  333.17   12.40
   1   2   1  331.67   11.90
   1   2   1  306.27   12.50
   1   2   1  345.37   12.80
   1   2   1  337.27   13.00
  -2  -2  -1  719.73   26.50
  -2  -2  -1  715.43   25.80
  -2  -2  -1  724.73   26.00
  -2  -2  -1  705.13   26.10
  -2  -2  -1  718.23   27.20
  -2  -2  -1  699.83   26.90
  -2  -2  -1  684.53   26.90
   2   2   1  741.33   27.50
   2   2   1  683.83   27.00
   2   2   1  706.93   26.00
   2   2   1  730.63   26.50
   2   2   1  729.73   25.90
   2   2   1  747.93   26.40
   2   2   1  698.43   27.10
  -3  -2  -1   17.70    2.90
  -3  -2  -1   16.00    3.00
  -3  -2  -1   13.00    3.10
  -3  -2  -1   15.20    3.60
  -3  -2  -1    5.40    3.20
  -3  -2  -1    9.70    2.50
  -3  -2  -1   11.00    3.10
   3   2   1   11.20    2.50
   3   2   1    7.30    3.20
   3   2   1   13.10    2.50
   3   2   1   10.70    3.00
   3   2   1   13.30    2.50
   3   2   1    8.40    2.70
   3   2   1   10.20    3.10
  -4  -2  -1  933.21   36.80
  -4  -2  -1  953.00   36.10
  -4  -2  -1  970.80   38.50
  -4  -2  -1  990.60   38.70
  -4  -2  -1  958.50   36.40
  -4  -2  -1  941.71   38.20
  -4  -2  -1  985.20   38.00
   4   2   1  969.00   36.50
   4   2   1 1017.80   36.30
   4   2   1 1025.00   38.20
   4   2   1  964.20   38.70
   4   2   1 1011.10   37.00
   4   2   1  982.40   38.40
   4   2   1  996.20   37.80
  -5  -2  -1  452.75   21.90
  -5  -2  -1  448.46   20.10
  -5  -2  -1  457.25   19.20
  -5  -2  -1  495.35   21.90
  -5  -2  -1  470.35   21.30
  -5  -2  -1  449.95   22.00
  -5  -2  -1  495.45   19.80
   5   2   1  484.85   21.90
   5   2   1  483.25   22.20
   5   2   1  422.06   18.70
   5   2   1  432.16   20.90
   5   2   1  510.95   21.60
  -6  -2  -1   37.30    5.80
  -6  -2  -1   27.30    5.30
  -6  -2  -1   19.00    5.20
  -6  -2  -1   21.20    5.80
  -6  -2  -1   23.00    6.40
  -6  -2  -1   17.20    5.30
   6   2   1   25.00    4.30
   6   2   1   28.80    7.10
   6   2   1   27.90    6.40
   6   2   1   21.80    5.20
   6   2   1   27.90    5.70
  -7  -2  -1  625.74   26.30
  -7  -2  -1  590.14   29.20
  -7  -2  -1  594.74   26.50
  -7  -2  -1  607.24   29.20
  -7  -2  -1  612.24   28.70
   7   2   1  607.94   24.70
   7   2   1  598.24   27.90
   7   2   1  562.54   27.50
   7   2   1  597.24   29.00
  -8  -2  -1    1.80    4.80
  -8  -2  -1    5.70    4.60
  -8  -2  -1    8.00    5.00
  -8  -2  -1   -1.50    5.80
   8   2   1   -0.30    5.00
   8   2   1    2.80    4.50
   8   2   1    4.80    3.50
  -9  -2  -1   57.69    9.40
  -9  -2  -1   69.89   12.60
  -9  -2  -1   43.70   10.90
  -9  -2  -1   62.39    9.90
   9   2   1   58.99   11.00
   9   2   1   47.70    6.70
   9   2   1   51.79    9.10
 -10  -2  -1   -9.40    5.00
 -10  -2  -1    1.80    6.00
 -10  -2  -1    5.70    8.10
  10   2   1    2.00    3.90
  10   2   1   -4.70    5.30
 -11  -2  -1  106.79   13.50
 -11  -2  -1  102.29   13.90
 -11  -2  -1  139.39   18.80
  11   2   1   88.59    9.40
  11   2   1  114.59   13.90
  11  -3  -1   66.19   13.30
 -11   3   1   51.69   12.20
 -11   3   1   91.89   16.50
 -11   3   1   77.49   14.10
 -11   3   1   53.79   12.20
  10  -3  -1   24.80    8.80
  10  -3  -1   47.50   11.20
 -10   3   1   30.40    9.80
 -10   3   1   29.50    8.10
 -10   3   1   34.70   10.20
 -10   3   1   49.50   11.10
   9  -3  -1  333.97   21.70
   9  -3  -1  304.07   20.60
  -9   3   1  302.17   21.40
  -9   3   1  319.47   19.20
  -9   3   1  319.87   21.30
  -9   3   1  306.67   21.20
   8  -3  -1   19.70    6.60
   8  -3  -1   11.30    6.30
  -8   3   1   18.90    7.20
  -8   3   1   21.10    7.40
  -8   3   1   24.90    6.50
  -8   3   1   16.70    6.50
   7  -3  -1  660.63   30.90
   7  -3  -1  604.24   29.50
   7  -3  -1  641.94   26.20
   7  -3  -1  629.34   28.10
  -7   3   1  643.74   27.80
  -7   3   1  676.93   30.50
  -7   3   1  629.54   30.20
  -7   3   1  584.34   29.90
  -7   3   1  617.34   29.30
   6  -3  -1  614.04   28.50
   6  -3  -1  660.73   27.10
   6  -3  -1  600.84   28.90
  -6   3   1  644.84   28.70
  -6   3   1  625.64   28.80
  -6   3   1  615.44   26.30
  -6   3   1  631.44   28.00
  -6   3   1  614.24   28.60
   5  -3  -1  853.61   35.70
   5  -3  -1  879.11   33.90
   5  -3  -1  855.21   36.10
  -5   3   1  819.62   34.50
  -5   3   1  834.12   35.70
  -5   3   1  893.21   35.30
  -5   3   1  848.62   35.40
  -5   3   1  887.01   36.30
  -5   3   1  842.22   33.20
   4  -3  -1  921.71   37.00
   4  -3  -1  943.21   34.70
  -4   3   1  907.81   36.10
  -4   3   1  941.81   34.20
  -4   3   1  912.11   35.50
  -4   3   1  887.51   36.90
  -4   3   1  910.41   35.70
  -4   3   1  889.61   36.80
  -4   3   1  894.61   33.20
   3  -3  -1  427.16   19.20
   3  -3  -1  425.86   16.70
   3  -3  -1  440.86   19.70
   3  -3  -1  439.66   17.00
  -3   3   1  432.76   17.70
  -3   3   1  412.66   19.10
  -3   3   1  436.66   17.80
  -3   3   1  457.85   18.50
   2  -3  -1  590.44   25.00
   2  -3  -1  582.34   24.10
  -2   3   1  618.34   22.60
  -2   3   1  643.34   24.60
  -2   3   1  616.14   24.20
  -2   3   1  606.84   23.00
   1  -3  -1  529.35   21.70
   1  -3  -1  502.65   20.00
  -1   3   1  562.74   21.50
  -1   3   1  510.35   20.00
   0  -3  -1  290.07   10.90
   0  -3  -1  309.17   13.60
   0   3   1  306.67   13.40
   0   3   1  281.77   10.90
   1   3   1  462.25   17.40
   1   3   1  482.65   17.60
   1   3   1  452.65   17.60
  -2  -3  -1   27.30    2.90
  -2  -3  -1   17.30    2.70
  -2  -3  -1   22.40    2.80
  -2  -3  -1   17.60    3.30
  -2  -3  -1   21.30    3.50
   2   3   1   22.90    2.60
   2   3   1   25.60    3.60
   2   3   1   15.30    3.60
   2   3   1   30.30    2.80
   2   3   1   21.00    4.00
   2   3   1   30.60    2.60
  -3  -3  -1    1.20    2.20
  -3  -3  -1    1.10    1.70
  -3  -3  -1   -3.30    2.20
  -3  -3  -1   -0.80    2.50
  -3  -3  -1    0.20    2.30
  -3  -3  -1    3.50    1.60
   3   3   1    2.60    2.80
   3   3   1    2.80    2.00
   3   3   1    0.80    1.70
   3   3   1    0.10    2.10
   3   3   1    3.30    2.00
   3   3   1    0.40    2.10
   3   3   1    5.80    3.00
  -4  -3  -1  260.97   14.00
  -4  -3  -1  251.07   13.60
  -4  -3  -1  284.87   11.80
  -4  -3  -1  273.77   13.20
  -4  -3  -1  248.88   13.30
  -4  -3  -1  255.57   12.10
  -4  -3  -1  257.67   11.60
   4   3   1  256.77   11.70
   4   3   1  281.17   13.90
   4   3   1  259.87   12.80
   4   3   1  254.17   13.40
   4   3   1  286.77   14.60
   4   3   1  269.67   11.80
   4   3   1  269.07   14.00
  -5  -3  -1   39.80    6.30
  -5  -3  -1   58.29    6.00
  -5  -3  -1   46.60    7.20
  -5  -3  -1   49.90    5.20
  -5  -3  -1   52.59    7.50
  -5  -3  -1   48.40    6.80
  -5  -3  -1   46.30    5.00
   5   3   1   57.79    5.30
   5   3   1   45.60    7.40
   5   3   1   42.50    7.00
   5   3   1   52.69    6.30
   5   3   1   50.29    6.40
   5   3   1   56.59    6.70
  -6  -3  -1    3.00    3.10
  -6  -3  -1    4.60    3.60
  -6  -3  -1    6.50    4.10
  -6  -3  -1    0.20    4.50
  -6  -3  -1    8.60    4.50
   6   3   1   -0.40    3.90
   6   3   1   10.10    3.30
   6   3   1    5.50    3.60
   6   3   1    7.20    4.10
  -7  -3  -1  129.69   10.00
  -7  -3  -1  129.79   10.90
  -7  -3  -1  101.89   11.80
  -7  -3  -1  124.99    9.40
  -7  -3  -1  110.19   11.00
   7   3   1  109.59    9.90
   7   3   1  111.69    8.10
   7   3   1   92.69   11.00
   7   3   1  123.09   10.80
  -8  -3  -1    4.10    6.30
  -8  -3  -1   14.40    5.90
  -8  -3  -1    7.80    5.00
  -8  -3  -1   11.50    4.80
   8   3   1    7.80    4.90
   8   3   1    5.20    5.80
   8   3   1   12.70    4.10
   8   3   1   10.70    5.30
  -9  -3  -1   36.50    9.60
  -9  -3  -1   64.59    9.60
  -9  -3  -1   52.89    9.60
   9   3   1   54.89    7.50
   9   3   1   48.60   11.00
   9   3   1   44.80    9.00
 -10  -3  -1   60.89   14.10
 -10  -3  -1   61.59   10.80
 -10  -3  -1   50.59   10.50
  10   3   1   52.89   10.70
  10   3   1   52.59    7.50
 -11  -3  -1   18.40    8.40
 -11  -3  -1   32.80    8.60
 -11  -3  -1   23.10   10.40
  11   3   1   47.50   11.30
  11   3   1   20.40    5.90
  11  -4  -1   97.09   16.00
 -11   4   1   70.59   12.90
 -11   4   1   91.09   16.80
 -11   4   1   68.89   16.30
  10  -4  -1  -11.90    5.00
  10  -4  -1   -8.00    6.50
 -10   4   1    0.20    6.10
 -10   4   1   -4.50    7.10
 -10   4   1   -0.10    7.90
 -10   4   1   10.60    8.20
   9  -4  -1   86.09   12.90
   9  -4  -1   68.49   12.10
  -9   4   1   62.49   10.30
  -9   4   1   52.19   12.10
  -9   4   1   84.19   13.10
  -9   4   1   74.19   13.20
   8  -4  -1  146.39   14.00
   8  -4  -1  161.88   14.40
  -8   4   1  137.79   11.90
  -8   4   1  158.28   14.30
  -8   4   1  135.69   14.00
  -8   4   1  176.08   15.40
   7  -4  -1  256.67   17.90
   7  -4  -1  270.17   18.00
   7  -4  -1  310.27   15.60
  -7   4   1  271.77   17.80
  -7   4   1  310.67   17.80
  -7   4   1  298.47   18.90
  -7   4   1  275.17   15.70
  -7   4   1  312.17   18.70
   6  -4  -1  104.39   10.60
   6  -4  -1   92.29   10.20
   6  -4  -1  102.89    7.70
  -6   4   1  112.29   10.60
  -6   4   1  110.39    9.90
  -6   4   1  102.99   10.90
  -6   4   1  110.09    8.50
  -6   4   1   91.49    9.90
   5  -4  -1   19.50    5.30
   5  -4  -1   17.10    5.20
   5  -4  -1   16.40    3.40
  -5   4   1   19.30    5.00
  -5   4   1   22.80    5.80
  -5   4   1   17.80    3.90
  -5   4   1   22.00    5.70
  -5   4   1   17.70    5.00
  -5   4   1   17.20    4.30
   4  -4  -1   49.99    3.90
   4  -4  -1   55.79    7.40
   4  -4  -1   56.19    6.70
  -4   4   1   59.69    6.20
  -4   4   1   46.20    6.30
  -4   4   1   56.79    5.80
  -4   4   1   54.29    7.10
  -4   4   1   48.90    7.20
   3  -4  -1  612.74   26.10
   3  -4  -1  603.14   27.20
  -3   4   1  624.94   23.90
  -3   4   1  668.53   25.00
  -3   4   1  625.14   24.30
  -3   4   1  631.54   26.30
   2  -4  -1  160.68   10.50
   2  -4  -1  150.68    8.60
  -2   4   1  155.58    7.00
  -2   4   1  135.99    8.30
  -2   4   1  143.09    6.60
  -2   4   1  155.18    9.40
   1  -4  -1   14.50    2.80
   1  -4  -1   22.10    4.80
  -1   4   1    7.80    2.20
  -1   4   1    8.20    3.00
   0  -4  -1  251.07    9.50
   0  -4  -1  275.97   13.10
   0   4   1  258.87   12.50
   0   4   1  230.48    9.50
   1   4   1  126.59    8.10
   1   4   1  130.39    6.20
   1   4   1  130.29    6.10
  -2  -4  -1  215.48    9.40
  -2  -4  -1  239.08   10.10
  -2  -4  -1  250.67   10.00
   2   4   1  247.88   10.90
   2   4   1  235.68    9.40
   2   4   1  222.48   10.50
   2   4   1  239.78    9.60
   2   4   1  242.28   11.30
  -3  -4  -1   66.39    5.00
  -3  -4  -1   73.19    5.90
  -3  -4  -1   74.49    5.30
  -3  -4  -1   71.09    4.70
  -3  -4  -1   80.19    6.30
   3   4   1   72.09    6.50
   3   4   1   73.79    5.50
   3   4   1   75.79    4.50
   3   4   1   67.59    4.90
   3   4   1   89.69    7.30
   3   4   1   72.59    6.20
   3   4   1   82.39    5.30
  -4  -4  -1   22.10    3.60
  -4  -4  -1   13.80    3.70
  -4  -4  -1   17.90    3.80
  -4  -4  -1   20.10    4.50
   4   4   1   10.60    3.20
   4   4   1   16.20    4.40
   4   4   1   23.20    3.90
   4   4   1   21.30    4.90
   4   4   1   14.50    3.40
   4   4   1   17.50    4.30
  -5  -4  -1  127.49    7.50
  -5  -4  -1  130.39    7.40
  -5  -4  -1  134.19    8.10
  -5  -4  -1  101.39    8.90
  -5  -4  -1  124.29    9.80
  -5  -4  -1  135.19    9.80
   5   4   1  122.29    9.70
   5   4   1  128.39    7.70
   5   4   1  120.49    8.90
   5   4   1  130.69    7.70
   5   4   1  124.79   10.60
  -6  -4  -1    5.30    4.20
  -6  -4  -1    1.10    4.50
  -6  -4  -1   10.80    3.40
  -6  -4  -1    3.40    2.80
  -6  -4  -1    1.50    3.90
  -6  -4  -1    5.70    3.70
   6   4   1    5.60    3.90
   6   4   1    0.10    3.30
   6   4   1    6.90    3.40
   6   4   1    7.20    4.60
  -7  -4  -1   61.29   10.10
  -7  -4  -1   34.50    7.20
  -7  -4  -1   50.89    6.70
  -7  -4  -1   71.29    9.10
  -7  -4  -1   48.40    7.30
   7   4   1   51.59    6.30
   7   4   1   39.00    6.80
   7   4   1   48.40    9.50
   7   4   1   41.60    8.20
  -8  -4  -1  167.98   16.50
  -8  -4  -1  183.08   11.80
  -8  -4  -1  184.88   15.90
  -8  -4  -1  182.08   12.80
   8   4   1  185.78   15.90
   8   4   1  155.18   11.00
   8   4   1  192.88   13.90
  -9  -4  -1   16.80    5.90
  -9  -4  -1   15.40    8.10
  -9  -4  -1   23.30    6.90
   9   4   1   29.90    8.80
   9   4   1   21.70    5.30
   9   4   1   35.00    8.10
 -10  -4  -1  188.18   14.00
 -10  -4  -1  199.38   15.40
 -10  -4  -1  198.48   18.70
  10   4   1  187.78   12.70
  10   4   1  178.48   15.90
 -11  -4  -1   39.60   11.00
 -11  -4  -1   42.90    9.30
 -11  -4  -1   60.79   11.10
  11   4   1   50.09   11.50
  11   4   1   41.80    8.00
  10  -5  -1   56.79   13.50
 -10   5   1   59.89   11.30
 -10   5   1   33.40   10.10
 -10   5   1   35.10   10.40
 -10   5   1   34.20   11.20
   9  -5  -1   -0.40    6.00
   9  -5  -1    5.10    7.40
  -9   5   1    5.30    5.60
  -9   5   1   -4.70    7.20
  -9   5   1   10.30    7.50
  -9   5   1   -8.90    5.90
   8  -5  -1   -1.10    6.20
   8  -5  -1    2.50    5.80
  -8   5   1    2.20    4.70
  -8   5   1   -0.50    5.60
  -8   5   1    2.40    6.00
  -8   5   1    3.20    6.60
   7  -5  -1   20.30    6.80
   7  -5  -1   15.90    6.70
  -7   5   1    8.80    5.30
  -7   5   1   21.30    6.70
  -7   5   1   16.10    6.50
  -7   5   1   12.30    4.90
  -7   5   1   12.70    6.80
   6  -5  -1   18.40    6.90
   6  -5  -1   10.50    5.40
  -6   5   1   10.80    5.30
  -6   5   1   17.20    4.40
  -6   5   1   26.60    5.90
  -6   5   1   22.20    6.20
  -6   5   1   12.30    6.10
   5  -5  -1   35.20    7.90
   5  -5  -1   18.00    5.40
  -5   5   1   17.20    5.80
  -5   5   1   21.90    6.10
  -5   5   1   33.20    6.30
  -5   5   1   27.10    5.70
  -5   5   1   30.90    5.70
   4  -5  -1   16.60    4.50
   4  -5  -1   19.90    6.10
  -4   5   1   26.00    4.70
  -4   5   1   14.30    5.10
  -4   5   1   24.20    5.50
  -4   5   1   24.20    4.60
  -4   5   1   28.50    6.20
   3  -5  -1    1.50    3.00
   3  -5  -1   -1.20    3.90
  -3   5   1    4.10    3.40
  -3   5   1    5.60    2.80
  -3   5   1    5.60    2.30
   2  -5  -1  757.12   31.90
   2  -5  -1  767.92   29.30
  -2   5   1  712.13   29.10
   1  -5  -1  332.57   14.20
   1  -5  -1  358.46   17.50
  -1   5   1  367.16   17.00
  -1   5   1  342.07   14.40
   0   5   1 1727.63   64.49
   1   5   1   74.39    4.60
   1   5   1   74.19    7.00
   2   5   1 1525.95   56.19
   2   5   1 1551.64   54.79
   2   5   1 1528.75   55.29
   2   5   1 1555.44   55.89
  -3  -5  -1 1853.21   65.89
  -3  -5  -1 1784.92   65.19
   3   5   1 1821.72   66.99
   3   5   1 1875.31   67.69
   3   5   1 1818.32   65.19
   3   5   1 1853.81   65.19
   3   5   1 1822.82   64.59
   3   5   1 1832.62   66.99
  -4  -5  -1  158.78    9.10
  -4  -5  -1  162.18    9.90
  -4  -5  -1  167.58    8.60
  -4  -5  -1  174.78    8.20
   4   5   1  157.48    8.70
   4   5   1  176.08    9.20
   4   5   1  172.78   11.50
   4   5   1  162.98   10.70
   4   5   1  163.88    7.80
   4   5   1  164.88   10.50
  -5  -5  -1  715.43   30.60
  -5  -5  -1  764.12   30.10
  -5  -5  -1  727.83   29.70
  -5  -5  -1  732.53   27.90
   5   5   1  736.93   31.10
   5   5   1  746.03   32.30
   5   5   1  726.73   28.70
   5   5   1  731.23   29.70
   5   5   1  717.43   27.90
  -6  -5  -1   59.89    7.70
  -6  -5  -1   48.30    5.50
  -6  -5  -1   45.60    7.60
  -6  -5  -1   42.10    7.60
   6   5   1   47.90    6.00
   6   5   1   45.70    7.50
   6   5   1   65.09    9.20
   6   5   1   43.10    6.50
  -7  -5  -1  366.96   20.70
  -7  -5  -1  377.86   17.00
  -7  -5  -1  363.86   17.10
  -7  -5  -1  371.76   20.50
  -7  -5  -1  390.86   20.40
  -7  -5  -1  374.56   17.90
   7   5   1  374.66   19.60
   7   5   1  364.96   20.60
   7   5   1  410.06   22.60
   7   5   1  394.26   17.90
  -8  -5  -1  196.68   13.00
  -8  -5  -1  221.48   16.30
  -8  -5  -1  202.28   12.30
   8   5   1  189.48   12.20
   8   5   1  218.88   14.70
   8   5   1  220.78   17.30
  -9  -5  -1  136.29   11.30
  -9  -5  -1  149.99   12.30
  -9  -5  -1  153.58   15.30
   9   5   1  153.58   11.30
   9   5   1  151.88   13.40
   9   5   1  176.48   16.90
 -10  -5  -1  123.09   15.70
 -10  -5  -1  146.89   13.00
 -10  -5  -1  133.89   12.10
  10   5   1  144.49   11.60
  10   5   1  129.29   13.70
 -11  -5  -1   37.20   10.70
 -11  -5  -1   50.99   10.70
  11   5   1   35.40    7.20
  11   5   1   35.80    9.40
  10  -6  -1   44.60   12.10
 -10   6   1   60.19   11.50
 -10   6   1   40.80   10.80
 -10   6   1   34.70   11.50
   9  -6  -1  160.58   16.70
   9  -6  -1  145.79   17.00
  -9   6   1  126.79   12.90
  -9   6   1  137.39   17.00
  -9   6   1  124.89   15.30
   8  -6  -1  182.78   18.00
   8  -6  -1  209.68   17.40
  -8   6   1  186.08   13.80
  -8   6   1  189.78   17.70
  -8   6   1  245.88   17.00
  -8   6   1  178.28   16.00
   7  -6  -1   56.89   11.70
   7  -6  -1   37.80    8.60
  -7   6   1   39.40    9.60
  -7   6   1   43.10    9.30
  -7   6   1   30.10    7.10
  -7   6   1   35.00    6.50
   6  -6  -1   22.10    7.00
   6  -6  -1   19.60    7.90
  -6   6   1   17.50    5.50
  -6   6   1   16.80    5.60
  -6   6   1   18.70    6.00
  -6   6   1   12.00    6.60
   5  -6  -1    2.70    4.50
   5  -6  -1   -3.70    5.30
  -5   6   1    0.60    3.80
  -5   6   1    7.60    5.50
  -5   6   1    4.80    3.60
  -5   6   1    3.20    4.10
  -5   6   1    0.00    4.50
   4  -6  -1  240.88   13.50
   4  -6  -1  199.48   15.20
  -4   6   1  239.88   12.30
  -4   6   1  194.18   13.10
  -4   6   1  210.98   11.20
  -4   6   1  200.08   14.10
  -4   6   1  220.58   10.80
   3  -6  -1  499.25   25.90
   3  -6  -1  539.35   23.40
  -3   6   1  558.44   25.00
  -3   6   1  576.14   21.60
  -3   6   1  507.25   23.30
  -3   6   1  536.55   20.90
   2  -6  -1  177.08    9.60
   2  -6  -1  187.58   12.90
  -2   6   1  165.08    9.70
   1  -6  -1  460.55   21.40
   1  -6  -1  419.36   16.90
  -1   6   1  398.66   16.90
   2   6   1  635.54   24.30
   2   6   1  646.04   25.10
   2   6   1  648.14   25.50
   2   6   1  630.54   24.00
   3   6   1  219.88    9.20
   3   6   1  225.38   11.80
   3   6   1  226.78    9.30
   3   6   1  194.28   11.40
   3   6   1  229.08   12.40
  -4  -6  -1    6.00    3.10
  -4  -6  -1    5.00    2.60
   4   6   1    3.70    2.70
   4   6   1    5.10    2.50
   4   6   1    2.60    3.70
   4   6   1    5.20    3.50
  -5  -6  -1  501.25   19.90
  -5  -6  -1  510.75   20.10
  -5  -6  -1  506.45   21.80
  -5  -6  -1  483.05   22.40
   5   6   1  521.45   23.70
   5   6   1  513.25   21.60
   5   6   1  507.55   19.80
   5   6   1  528.05   24.90
   5   6   1  487.25   21.00
  -6  -6  -1   67.99    7.60
  -6  -6  -1   66.79    7.60
  -6  -6  -1   77.39    8.90
  -6  -6  -1   57.29    5.80
   6   6   1   73.29    9.00
   6   6   1   85.19    7.70
   6   6   1   64.59   10.00
   6   6   1   60.99    5.80
   6   6   1   76.89    7.10
  -7  -6  -1   46.10    8.70
  -7  -6  -1   45.30    7.80
  -7  -6  -1   56.99    6.40
   7   6   1   58.09    7.80
   7   6   1   48.90   10.30
   7   6   1   50.69    7.10
  -8  -6  -1  334.77   16.70
  -8  -6  -1  332.67   19.80
   8   6   1  343.87   17.70
   8   6   1  381.86   20.10
   8   6   1  369.86   22.90
  -9  -6  -1  167.48   15.20
   9   6   1  148.69   13.60
   9   6   1  174.18   12.00
   9   6   1  144.99   16.40
 -10  -6  -1   28.70    6.80
 -10  -6  -1   31.90    9.00
  10   6   1   18.80    6.00
  10   6   1   22.20    7.60
  10   6   1   34.10   11.00
   9  -7  -1  226.28   20.10
   9  -7  -1  194.38   20.90
  -9   7   1  233.88   21.20
  -9   7   1  213.08   18.80
   8  -7  -1  276.97   22.10
   8  -7  -1  238.28   19.10
  -8   7   1  230.98   17.60
  -8   7   1  229.38   20.10
   7  -7  -1  190.28   18.60
   7  -7  -1  246.28   17.60
  -7   7   1  209.88   15.30
  -7   7   1  209.98   18.00
   6  -7  -1   53.99   11.80
   6  -7  -1   53.09    9.50
  -6   7   1   50.49    8.80
  -6   7   1   54.89   10.60
  -6   7   1   45.50    9.80
  -6   7   1   50.19    8.40
   5  -7  -1  191.98   16.20
   5  -7  -1  170.28   13.00
  -5   7   1  181.98   11.30
  -5   7   1  167.38   10.90
  -5   7   1  170.98   12.00
  -5   7   1  161.28   14.30
   4  -7  -1    3.60    5.90
   4  -7  -1    3.00    4.10
  -4   7   1    0.00    4.90
  -4   7   1    3.70    4.20
  -4   7   1    3.30    2.80
  -4   7   1   -1.70    2.80
  -4   7   1    3.00    3.60
   3  -7  -1  322.67   15.80
   3  -7  -1  313.47   19.30
  -3   7   1  291.87   12.90
  -3   7   1  326.47   13.60
  -3   7   1  301.67   15.60
  -3   7   1  285.97   17.10
   2  -7  -1  139.69   12.50
   2  -7  -1  156.68    9.00
  -2   7   1  143.89    8.90
   1  -7  -1  115.09   10.70
  -1   7   1   97.89    6.20
   2   7   1   19.30    4.50
   2   7   1   20.10    3.50
   2   7   1   23.00    4.10
   2   7   1   21.80    3.80
   3   7   1    2.80    3.30
   3   7   1   -1.40    3.30
   3   7   1    3.10    3.60
   4   7   1    2.60    3.60
   4   7   1    0.50    4.10
   4   7   1    0.40    2.00
  -5  -7  -1    6.20    3.30
   5   7   1    2.70    3.30
   5   7   1   -0.20    3.90
   5   7   1   -2.20    4.30
   5   7   1    4.20    3.00
  -6  -7  -1    3.20    4.00
   6   7   1    1.40    3.20
   6   7   1    3.90    3.70
   6   7   1    7.20    5.10
   6   7   1    5.80    5.70
  -7  -7  -1  103.79    9.80
  -7  -7  -1   94.69    8.30
   7   7   1  101.09   12.90
   7   7   1   96.19    8.90
   7   7   1   68.29    8.40
  -8  -7  -1    5.80    5.00
   8   7   1    5.20    6.70
   8   7   1   11.20    5.10
   8   7   1    6.40    4.80
  -9  -7  -1   11.80    6.30
   9   7   1   19.30    8.40
   9   7   1   12.10    6.10
   9   7   1    4.70    5.00
 -10  -7  -1   12.90    7.80
  10   7   1   14.20    9.30
  10   7   1   13.70    6.00
   8  -8  -1   18.80   10.40
   8  -8  -1   37.50   10.10
  -8   8   1   63.29   14.80
  -8   8   1   66.49   12.20
   7  -8  -1  131.19   14.00
   7  -8  -1   88.99   15.60
  -7   8   1  135.19   12.90
  -7   8   1   87.79   14.60
   6  -8  -1  190.58   15.20
   6  -8  -1  175.18   17.80
  -6   8   1  183.28   14.20
  -6   8   1  228.08   17.70
  -6   8   1  177.48   13.30
   5  -8  -1   71.49    9.90
   5  -8  -1   67.19   12.80
  -5   8   1   56.49    7.70
  -5   8   1   75.89   11.80
  -5   8   1   74.49    9.00
   4  -8  -1    9.10    7.50
   4  -8  -1    0.40    3.80
  -4   8   1   -7.90    3.70
  -4   8   1   -3.00    5.40
  -4   8   1    0.90    3.80
  -4   8   1    0.90    3.20
   3  -8  -1    7.00    6.80
   3  -8  -1    0.60    3.60
  -3   8   1    4.80    5.20
  -3   8   1    5.10    4.00
   2  -8  -1   40.10    8.70
   2  -8  -1   44.20    5.40
  -2   8   1   30.60    6.50
  -2   8   1   29.70    5.40
   1  -8  -1    6.30    5.50
  -1   8   1   -0.80    2.10
   2   8   1   48.50    6.10
   2   8   1   50.89    5.20
   2   8   1   54.19    5.90
   2   8   1   52.59    4.80
   3   8   1  313.77   15.80
   3   8   1  325.27   16.70
   4   8   1   39.60    7.30
   4   8   1   45.40    8.50
   5   8   1  176.28   13.80
   5   8   1  147.39   11.90
   5   8   1  154.08    8.60
   5   8   1  148.79    9.60
   6   8   1   99.79   12.70
   6   8   1  115.19    9.00
   6   8   1  118.09    8.50
   7   8   1   30.50    8.80
   7   8   1   34.00    7.30
   8   8   1  353.76   23.60
   8   8   1  330.47   17.80
   9   8   1  222.28   20.10
   9   8   1  187.88   13.70
   7  -9  -1   34.90    9.20
   7  -9  -1   -0.30   10.00
  -7   9   1   21.00    7.40
  -7   9   1   31.50   10.40
   6  -9  -1   21.40   10.10
   6  -9  -1    9.60    6.20
  -6   9   1    5.30    5.20
  -6   9   1   10.90    8.00
   5  -9  -1   70.09   14.10
   5  -9  -1   54.19    9.20
  -5   9   1   80.29    8.70
  -5   9   1   80.59   12.70
  -5   9   1   67.49    9.30
   4  -9  -1   30.70    9.80
   4  -9  -1   18.40    6.10
  -4   9   1   30.50    5.90
  -4   9   1   34.40    8.40
  -4   9   1   29.20    5.80
   3  -9  -1  184.88   17.10
   3  -9  -1  183.98   11.80
  -3   9   1  207.78   14.90
   2  -9  -1  453.65   26.40
  -2   9   1  455.75   21.30
  -2   9   1  494.45   23.40
  -1   9   1   29.80    6.10
  -1   9   1   26.70    3.70
   0   9   1   49.20    7.20
   2   9   1  188.08    9.90
   2   9   1  195.98   11.10
   2   9   1  203.58   11.60
   3   9   1  709.43   30.20
   3   9   1  682.63   29.20
   4   9   1   36.10    8.60
   4   9   1   32.50    6.50
   5   9   1   81.39    7.50
   5   9   1   82.29   11.10
   6   9   1  135.29   10.00
   6   9   1  134.59   14.40
   7   9   1   60.19    8.50
   7   9   1   71.49   12.70
   8   9   1  207.78   14.20
   8   9   1  249.18   20.20
   9   9   1   85.19   10.20
   9   9   1   65.79   15.10
   6 -10  -1  132.09   18.60
  -6  10   1  114.99   11.80
  -6  10   1  124.59   16.10
   5 -10  -1   63.79   15.00
  -5  10   1   83.19   10.20
  -5  10   1   84.59    9.00
  -5  10   1   63.29   13.10
   4 -10  -1  126.59   16.90
  -4  10   1  126.49   14.70
  -4  10   1  134.49    9.20
  -4  10   1  151.08   10.30
   3 -10  -1  141.29   16.70
  -3  10   1  191.58   15.00
   2 -10  -1  273.37   20.90
  -2  10   1  295.87   17.90
  -1  10   1  368.56   19.40
   0  10   1  165.48   11.60
   1  10   1    4.10    4.10
   2  10   1  141.09    9.60
   2  10   1  137.19   10.30
   3  10   1  205.98   13.90
   3  10   1  197.78   12.70
   4  10   1    1.60    4.60
   4  10   1    4.20    5.50
   5  10   1  162.68   14.80
   6  10   1   47.20   11.70
   7  10   1  187.48   17.70
   8  10   1  110.99   16.00
   8  10   1  109.29   11.10
   5 -11  -1   18.50   11.20
  -5  11   1   22.30    6.00
  -5  11   1   27.00   10.20
  -5  11   1   36.70    7.60
   4 -11  -1  125.49   18.00
  -4  11   1  152.38   15.80
   3 -11  -1   41.40   11.80
  -3  11   1   52.89   11.10
  -2  11   1    6.10    6.30
  -1  11   1   15.50    6.10
   2  11   1   39.70    7.70
   2  11   1   27.50    5.80
   3  11   1   -2.30    5.00
   3  11   1    5.50    4.60
   4  11   1    7.00    6.30
   5  11   1   49.00   11.50
   6  11   1   69.59   13.20
  -3  12   1   -4.60    6.90
   2  12   1   57.29    8.80
   2  12   1   77.69    8.60
   3  12   1   10.10    5.60
   4  12   1    6.80    6.90
   5  12   1   34.60    9.20
   3  12  -2   45.60   10.30
   2  12  -2   59.49   10.00
   5  11  -2   12.60    8.00
   4  11  -2  165.28   15.10
   3  11  -2   75.59   10.80
   2  11  -2   59.79    8.10
   2  11  -2   65.19    9.20
   1  11  -2  428.46   19.40
   1  11  -2  389.16   18.20
  -3  11  -2   17.50    7.10
   3 -11   2   19.10    9.50
  -4  11  -2   56.59   12.70
   4 -11   2   56.49   13.00
  -5  11  -2   52.39    8.90
  -5  11  -2   63.19    9.60
   5 -11   2   53.09   13.50
   7  10  -2  209.38   19.90
   6  10  -2  108.89   14.80
   5  10  -2   61.79   12.20
   4  10  -2   84.09   11.40
   3  10  -2   65.79    9.80
   3  10  -2   56.59    8.50
   2  10  -2  135.39   10.90
   2  10  -2  129.49   10.00
   1  10  -2   14.10    4.20
   1  10  -2   18.00    4.80
  -1  10  -2   14.50    5.10
  -2  10  -2   15.90    6.00
   2 -10   2   12.00    7.40
  -3  10  -2   39.90    8.00
   3 -10   2   35.40   10.50
  -4  10  -2   21.20    7.80
   4 -10   2   40.10   11.00
  -5  10  -2    6.90    5.20
  -5  10  -2    2.10    4.90
  -5  10  -2   13.60    8.30
   5 -10   2   13.30    9.20
  -6  10  -2   -5.10    5.30
  -6  10  -2    8.60    8.40
   6 -10   2    7.90   10.30
   8   9  -2   70.59   15.50
   8   9  -2   76.29    9.70
   7   9  -2   37.00   10.10
   7   9  -2   28.50    6.30
   6   9  -2    3.30    6.90
   6   9  -2    2.50    4.40
   5   9  -2   33.90    6.60
   5   9  -2   73.29   11.30
   4   9  -2   16.30    6.20
   4   9  -2   14.00    5.60
   3   9  -2   -4.70    3.80
   3   9  -2   -0.80    4.60
   2   9  -2    2.70    3.70
   2   9  -2   -2.50    3.70
   1   9  -2   11.00    3.20
   1   9  -2   19.30    4.40
   1   9  -2   15.00    3.60
   0   9  -2   -0.50    3.30
  -1   9  -2   37.00    6.70
  -2   9  -2   51.89    8.20
   2  -9   2   42.90   10.50
  -3   9  -2  175.58   13.70
   3  -9   2  204.68   17.10
  -4   9  -2   30.70    6.30
  -4   9  -2   16.70    7.30
  -4   9  -2   35.20    6.30
   4  -9   2   30.40    9.50
  -5   9  -2   67.39   11.90
  -5   9  -2   58.09    8.40
  -5   9  -2   78.89    9.10
   5  -9   2   69.99   13.60
  -6   9  -2  134.09   12.00
  -6   9  -2  137.59   15.20
   6  -9   2  129.69   17.10
  -7   9  -2   84.79   12.40
  -7   9  -2  108.69   16.40
   7  -9   2   92.89   13.00
   7  -9   2   73.49   15.70
   9   8  -2    7.40    9.20
   9   8  -2    5.30    5.60
   8   8  -2   19.30    9.30
   8   8  -2   15.70    5.70
   7   8  -2   21.30    5.20
   7   8  -2   19.90    8.20
   6   8  -2  163.38   15.40
   6   8  -2  164.98   12.10
   6   8  -2  155.88   10.80
   5   8  -2    7.80    4.10
   5   8  -2   -2.30    3.30
   5   8  -2    4.30    6.00
   4   8  -2    0.70    5.10
   4   8  -2    5.50    4.50
   4   8  -2    3.90    3.00
   3   8  -2  136.39    8.00
   3   8  -2  162.38   10.80
   3   8  -2  157.78   11.80
   2   8  -2  203.28   11.90
   2   8  -2  190.88    8.80
   2   8  -2  184.68    8.90
   2   8  -2  178.38   10.10
   2   8  -2  221.28   11.30
   1   8  -2  329.57   14.10
   1   8  -2  314.77   13.10
   1   8  -2  307.97   13.30
   1   8  -2  324.17   14.70
   1   8  -2  307.57   13.00
   0   8  -2  315.17   14.00
   0   8  -2  330.67   14.80
  -1   8  -2  144.89    9.70
  -1   8  -2  139.69    8.70
   1  -8   2  142.19   12.40
  -2   8  -2   66.99    7.00
  -2   8  -2   76.29    8.30
   2  -8   2   85.29   10.90
  -3   8  -2    0.70    4.60
  -3   8  -2    1.90    4.00
   3  -8   2   -2.90    5.70
  -4   8  -2    9.20    4.00
  -4   8  -2    5.50    3.60
  -4   8  -2   -2.30    5.20
  -4   8  -2    1.70    4.80
   4  -8   2    2.40    6.60
  -5   8  -2  288.87   18.80
  -5   8  -2  283.07   15.10
  -5   8  -2  254.97   15.10
   5  -8   2  278.77   20.40
   5  -8   2  252.67   16.60
  -6   8  -2   34.90    8.50
  -6   8  -2   58.89   12.00
  -6   8  -2   43.40    8.70
   6  -8   2   40.80   10.90
   6  -8   2   40.30    9.00
  -7   8  -2  159.88   14.00
  -7   8  -2  164.98   16.60
   7  -8   2  199.38   18.80
   7  -8   2  151.08   15.10
  -8   8  -2  122.09   16.70
  -8   8  -2  129.29   14.80
   8  -8   2  142.59   15.60
   8  -8   2  143.39   18.30
   9   7  -2   33.40   10.20
   9   7  -2   35.80   10.60
   9   7  -2   36.80    7.20
  -9  -7   2   39.10    9.30
   8   7  -2   41.90    7.70
   8   7  -2   25.40    9.40
   8   7  -2   34.50    8.40
  -8  -7   2   39.30    7.60
   7   7  -2  205.88   17.90
   7   7  -2  173.08   13.00
   7   7  -2  197.48   12.20
  -7  -7   2  175.88   10.20
   6   7  -2  196.48   16.50
   6   7  -2  226.48   13.60
   6   7  -2  224.28   12.50
   5   7  -2   96.49    9.80
   5   7  -2   84.49    7.50
   5   7  -2   88.39    7.90
   5   7  -2   94.59   11.30
   4   7  -2  508.65   23.60
   4   7  -2  518.25   22.00
   4   7  -2  521.25   21.10
   4   7  -2  515.55   24.90
   3   7  -2  619.94   25.50
   3   7  -2  676.43   27.40
   3   7  -2  668.53   28.60
   2   7  -2  876.11   33.40
   2   7  -2  880.41   34.30
   2   7  -2  834.72   32.60
   2   7  -2  851.31   32.10
   1   7  -2  316.07   12.90
   1   7  -2  284.97   12.50
   1   7  -2  307.87   13.40
   1   7  -2  307.67   13.80
   1   7  -2  310.57   12.90
   0   7  -2  181.38    9.80
   0   7  -2  206.58    9.60
  -1   7  -2   12.10    3.80
  -1   7  -2    8.00    3.00
   1  -7   2    6.70    4.70
  -2   7  -2  478.25   20.70
  -2   7  -2  436.56   21.00
   2  -7   2  480.05   23.60
  -3   7  -2  185.28   12.00
  -3   7  -2  181.98   12.80
  -3   7  -2  204.08    9.40
   3  -7   2  198.08   14.90
  -4   7  -2   35.40    7.60
  -4   7  -2   41.50    5.90
  -4   7  -2   36.60    6.10
  -4   7  -2   37.30    8.60
   4  -7   2   31.60    6.70
   4  -7   2   34.00    8.50
  -5   7  -2   50.49    7.80
  -5   7  -2   58.79   10.60
  -5   7  -2   46.50    7.40
  -5   7  -2   47.70    6.50
   5  -7   2   37.30    8.40
   5  -7   2   43.20   10.50
  -6   7  -2   57.89   11.10
  -6   7  -2   55.09    9.00
  -6   7  -2   59.69    9.20
   6  -7   2   51.39    9.50
   6  -7   2   60.89   12.00
  -7   7  -2   63.39   10.60
  -7   7  -2   62.09   12.30
   7  -7   2   70.89   13.10
   7  -7   2   55.99   10.80
  -8   7  -2   10.20    8.50
  -8   7  -2    7.00    7.00
   8  -7   2   -4.40    5.80
   8  -7   2   -2.10    7.40
  -9   7  -2  122.79   16.10
  -9   7  -2  115.39   17.60
   9  -7   2  156.28   16.40
   9  -7   2  151.58   18.30
  10   6  -2  170.88   13.00
  10   6  -2  172.28   15.60
 -10  -6   2  173.98   16.40
   9   6  -2  167.48   14.60
   9   6  -2  197.98   18.90
   9   6  -2  160.78   12.30
  -9  -6   2  164.68   14.40
   8   6  -2  114.49   11.20
   8   6  -2   99.49    9.50
   8   6  -2  111.29   14.70
  -8  -6   2   82.89   10.70
   7   6  -2   13.00    4.70
   7   6  -2    5.60    5.00
   7   6  -2   10.10    6.90
  -7  -6   2   13.50    5.10
   6   6  -2   94.29    9.10
   6   6  -2   95.19    8.00
   6   6  -2   89.49   10.20
   6   6  -2  100.99   12.10
  -6  -6   2   80.29    7.90
  -6  -6   2   77.79    9.30
  -6  -6   2  119.89    9.70
   5   6  -2  902.51   38.10
   5   6  -2  903.11   36.90
   5   6  -2  980.60   40.30
   5   6  -2  904.81   35.30
  -5  -6   2  904.91   36.90
   4   6  -2  434.56   21.00
   4   6  -2  437.26   18.70
   4   6  -2  466.35   20.10
   4   6  -2  478.35   22.70
  -4  -6   2  467.95   21.80
   3   6  -2   50.49    7.10
   3   6  -2   53.89    6.20
   3   6  -2   58.29    6.60
   3   6  -2   49.10    5.10
   2   6  -2   93.19    6.10
   2   6  -2   94.39    7.00
   2   6  -2  100.29    7.80
   2   6  -2   93.99    6.40
   2   6  -2   89.09    7.90
   1   6  -2   23.20    3.00
   1   6  -2   27.10    3.80
   1   6  -2   23.80    4.90
   1   6  -2   26.80    4.20
   0   6  -2  430.56   19.70
   0   6  -2  446.46   17.70
   0   6  -2  431.06   17.70
  -1   6  -2    9.20    4.40
  -1   6  -2    0.60    2.30
  -1   6  -2    1.00    2.90
   1  -6   2    1.40    3.60
  -2   6  -2   42.90    5.40
  -2   6  -2   42.00    6.10
   2  -6   2   46.90    7.60
  -3   6  -2   51.59    6.60
  -3   6  -2   41.60    4.60
  -3   6  -2   36.90    6.90
  -3   6  -2   47.40    4.60
   3  -6   2   59.89    8.40
   3  -6   2   55.39    6.20
  -4   6  -2    1.40    4.30
  -4   6  -2    0.20    2.90
  -4   6  -2   -1.50    3.90
  -4   6  -2   -1.70    2.90
   4  -6   2    3.10    5.30
   4  -6   2    2.50    3.80
  -5   6  -2   19.30    6.40
  -5   6  -2    6.80    4.40
  -5   6  -2   10.40    4.10
  -5   6  -2    8.30    4.40
   5  -6   2   11.70    6.90
   5  -6   2   11.50    5.30
  -6   6  -2   21.60    6.10
  -6   6  -2   14.10    5.50
  -6   6  -2   17.50    5.70
  -6   6  -2    6.70    6.20
   6  -6   2   16.50    5.80
   6  -6   2   17.90    7.30
  -7   6  -2    6.90    7.30
  -7   6  -2    0.40    5.50
  -7   6  -2    1.30    4.30
  -7   6  -2    7.30    5.60
  -7   6  -2    7.80    6.50
   7  -6   2   -5.10    5.70
   7  -6   2   -2.40    4.80
  -8   6  -2   14.40    8.20
  -8   6  -2   10.30    5.60
  -8   6  -2    0.30    6.20
   8  -6   2   11.50    8.00
   8  -6   2   14.00    6.90
  -9   6  -2   14.40    9.30
  -9   6  -2    9.70    6.30
  -9   6  -2   -3.60    7.20
   9  -6   2   11.40    8.90
   9  -6   2   11.20    7.90
 -10   6  -2   17.20   10.00
 -10   6  -2   16.50    9.50
  10  -6   2    7.50    9.10
  10   5  -2   27.30    7.90
  10   5  -2   26.70    6.70
 -10  -5   2   35.60    9.80
 -10  -5   2   27.70    7.30
   9   5  -2   73.59   10.30
   9   5  -2   55.39    8.10
   9   5  -2   84.59   14.00
  -9  -5   2   59.59    8.80
  -9  -5   2   64.59   11.90
   8   5  -2    4.00    4.30
   8   5  -2    0.70    5.00
   8   5  -2    3.90    6.70
  -8  -5   2    3.50    3.70
  -8  -5   2    0.70    4.20
  -8  -5   2    1.40    5.70
   7   5  -2   16.50    5.70
   7   5  -2   16.60    7.40
   7   5  -2   30.20    6.20
  -7  -5   2   19.00    3.80
  -7  -5   2   16.20    4.50
  -7  -5   2   23.20    6.60
   6   5  -2  358.96   16.40
   6   5  -2  352.96   20.70
   6   5  -2  335.47   19.10
   6   5  -2  318.67   17.80
  -6  -5   2  354.66   18.80
  -6  -5   2  343.27   14.30
  -6  -5   2  349.47   18.50
  -6  -5   2  365.96   18.00
   5   5  -2    1.90    2.80
   5   5  -2   -1.40    4.10
   5   5  -2    1.90    3.70
   5   5  -2    1.20    3.40
  -5  -5   2   -0.20    3.20
  -5  -5   2    3.30    3.30
  -5  -5   2   -1.20    3.20
   4   5  -2   20.00    3.70
   4   5  -2   19.00    4.10
   4   5  -2   17.90    5.30
   4   5  -2    8.10    3.80
  -4  -5   2   17.80    4.20
  -4  -5   2   15.30    2.90
   3   5  -2   11.70    4.20
   3   5  -2    9.70    3.40
   3   5  -2   11.50    3.70
   3   5  -2   17.30    3.40
   3   5  -2   11.40    3.20
  -3  -5   2   13.20    3.20
   2   5  -2  327.87   14.90
   2   5  -2  299.77   13.30
   2   5  -2  309.57   13.60
   2   5  -2  303.27   13.90
   1   5  -2   -0.30    1.80
   1   5  -2   -1.50    2.10
   1   5  -2    1.10    2.80
   0   5  -2  439.96   19.70
   0   5  -2  463.05   18.20
   0   5  -2  480.05   18.50
  -1   5  -2   18.60    3.70
  -1   5  -2   24.30    4.60
  -1   5  -2   19.40    4.30
   1  -5   2   19.40    4.60
  -2   5  -2  222.88   11.60
  -2   5  -2  216.88   11.90
  -2   5  -2  226.88   12.00
   2  -5   2  249.58   13.50
  -3   5  -2 1747.43   62.09
  -3   5  -2 1682.03   64.59
  -3   5  -2 1747.73   62.19
  -3   5  -2 1728.53   64.69
   3  -5   2 1714.43   65.79
   3  -5   2 1754.12   64.59
  -4   5  -2  188.08   12.20
  -4   5  -2  194.68   10.50
  -4   5  -2  178.08   12.30
  -4   5  -2  192.78   10.70
   4  -5   2  209.98   12.30
   4  -5   2  164.38   12.50
  -5   5  -2   56.99    7.30
  -5   5  -2   57.99    8.60
  -5   5  -2   60.09    7.30
  -5   5  -2   58.69    8.60
  -5   5  -2   55.49    6.70
   5  -5   2   47.30    8.30
   5  -5   2   62.19    7.80
  -6   5  -2  105.69    8.00
  -6   5  -2   76.19    9.50
  -6   5  -2   99.99   10.10
  -6   5  -2  108.19   11.10
  -6   5  -2  100.39   10.00
   6  -5   2   96.29   11.20
   6  -5   2  108.09   10.80
  -7   5  -2   -0.50    5.80
  -7   5  -2   -2.60    5.00
  -7   5  -2    8.50    5.60
  -7   5  -2    0.70    5.00
  -7   5  -2    2.70    4.40
   7  -5   2   -0.80    4.80
   7  -5   2    4.40    6.10
  -8   5  -2  170.88   15.20
  -8   5  -2  178.28   16.00
  -8   5  -2  140.39   11.80
  -8   5  -2  166.48   14.80
   8  -5   2  166.38   15.30
   8  -5   2  147.09   14.40
  -9   5  -2  279.97   20.10
  -9   5  -2  262.07   17.00
  -9   5  -2  280.47   21.00
  -9   5  -2  231.68   19.50
   9  -5   2  268.97   20.40
   9  -5   2  257.67   20.30
 -10   5  -2   26.10   10.20
 -10   5  -2   63.19   12.30
 -10   5  -2   64.89   11.00
 -10   5  -2   43.40   11.60
  10  -5   2   24.30    9.80
  11   4  -2    7.00    6.50
  11   4  -2   -0.80    4.40
 -11  -4   2   16.70    9.90
 -11  -4   2    4.50    6.10
  10   4  -2    3.80    6.50
  10   4  -2   16.90    5.70
 -10  -4   2    1.90    7.40
 -10  -4   2   11.30    6.40
 -10  -4   2    9.50    5.70
   9   4  -2  184.38   15.30
   9   4  -2  149.99   11.40
   9   4  -2  161.48   16.70
  -9  -4   2  176.48   12.20
  -9  -4   2  141.09   12.60
  -9  -4   2  181.18   16.30
   8   4  -2    4.00    6.30
   8   4  -2   -0.30    4.10
   8   4  -2   -1.50    3.40
  -8  -4   2    1.20    4.20
  -8  -4   2   -4.50    5.40
  -8  -4   2   -3.70    3.50
   7   4  -2   45.10    9.60
   7   4  -2   44.00    6.50
   7   4  -2   48.90    7.80
   7   4  -2   46.50    8.50
  -7  -4   2   44.50    7.10
  -7  -4   2   47.60    6.20
  -7  -4   2   40.90    7.50
  -7  -4   2   43.80    9.20
   6   4  -2   73.19    8.20
   6   4  -2  110.19   11.30
   6   4  -2   97.29    9.70
   6   4  -2  113.89    7.80
  -6  -4   2  101.99    7.90
  -6  -4   2   68.39    8.90
  -6  -4   2  105.49    9.70
  -6  -4   2   88.49    6.60
  -6  -4   2   92.59    9.50
  -6  -4   2   93.29    6.80
   5   4  -2  212.68   14.50
   5   4  -2  219.78   12.90
   5   4  -2  231.48   13.60
   5   4  -2  239.28   11.40
  -5  -4   2  236.48   13.50
  -5  -4   2  209.78   11.10
  -5  -4   2  232.88   10.60
  -5  -4   2  201.88   12.60
  -5  -4   2  215.18   10.00
  -5  -4   2  240.08   13.20
   4   4  -2  142.09    9.20
   4   4  -2  141.29   10.20
   4   4  -2  126.09    7.60
   4   4  -2  150.78    9.70
   4   4  -2  127.79   10.30
  -4  -4   2  135.99    9.30
  -4  -4   2  139.89    8.70
  -4  -4   2  134.69    8.90
   3   4  -2 1491.95   54.69
   3   4  -2 1521.25   56.09
   3   4  -2 1481.45   55.19
   3   4  -2 1527.25   56.79
   3   4  -2 1476.05   53.79
   3   4  -2 1503.15   55.79
  -3  -4   2 1486.65   53.79
  -3  -4   2 1523.05   55.19
   2   4  -2  995.10   39.20
   2   4  -2 1049.70   38.30
   2   4  -2  987.70   38.30
   2   4  -2 1043.60   38.70
  -2  -4   2 1063.29   37.80
  -2  -4   2 1051.09   38.10
   1   4  -2  175.18    8.60
   1   4  -2  165.48    7.30
   1   4  -2  170.88    9.10
   1   4  -2  191.68    8.30
   0   4  -2 1354.46   49.30
   0   4  -2 1301.07   47.90
   0  -4   2 1365.66   49.60
  -1   4  -2  699.43   27.20
  -1   4  -2  692.63   26.80
  -1   4  -2  703.73   26.80
   1  -4   2  684.23   27.80
  -2   4  -2 1644.94   58.69
  -2   4  -2 1663.13   60.69
  -2   4  -2 1621.44   60.89
  -2   4  -2 1710.43   58.69
  -2   4  -2 1596.74   60.79
   2  -4   2 1663.93   60.89
   2  -4   2 1732.23   61.89
  -3   4  -2  786.42   32.10
  -3   4  -2  802.72   30.10
  -3   4  -2  820.22   30.30
  -3   4  -2  794.02   32.20
   3  -4   2  782.42   31.90
   3  -4   2  790.02   32.50
  -4   4  -2  367.76   18.30
  -4   4  -2  367.96   16.60
  -4   4  -2  373.56   16.80
  -4   4  -2  349.37   18.10
   4  -4   2  386.86   18.30
   4  -4   2  369.06   18.40
  -5   4  -2   10.00    4.80
  -5   4  -2   16.60    4.60
  -5   4  -2   12.60    4.50
  -5   4  -2   12.30    5.10
  -5   4  -2   18.60    4.60
  -5   4  -2   14.00    3.50
   5  -4   2   21.30    5.30
   5  -4   2   16.10    4.90
  -6   4  -2   38.90    7.70
  -6   4  -2   41.70    6.10
  -6   4  -2   51.99    8.80
  -6   4  -2   54.19    8.20
  -6   4  -2   34.10    7.60
   6  -4   2   39.40    7.90
   6  -4   2   35.40    7.30
  -7   4  -2  865.21   40.30
  -7   4  -2  976.00   40.60
  -7   4  -2  928.71   40.30
  -7   4  -2  989.30   41.40
  -7   4  -2  975.00   38.10
   7  -4   2  899.21   40.80
   7  -4   2  974.60   42.10
  -8   4  -2   93.39   10.00
  -8   4  -2   81.29   12.20
  -8   4  -2   86.89   12.00
  -8   4  -2   95.69   12.50
   8  -4   2  101.59   11.80
   8  -4   2   91.19   11.90
  -9   4  -2   53.19   10.80
  -9   4  -2   65.89   10.00
  -9   4  -2   68.49   12.60
  -9   4  -2   68.49   12.20
   9  -4   2   62.49   11.50
   9  -4   2   61.59   11.40
 -10   4  -2  168.98   18.00
 -10   4  -2  147.09   16.90
 -10   4  -2  169.38   17.80
 -10   4  -2  157.08   14.30
  10  -4   2  142.89   15.90
  10  -4   2  170.78   17.40
 -11   4  -2   23.10   10.50
 -11   4  -2   31.30   11.40
 -11   4  -2   26.60    8.70
 -11   4  -2   31.80   10.90
  11  -4   2   28.90   10.30
  11   3  -2   -1.40    4.10
  11   3  -2    0.80    6.80
 -11  -3   2   -1.90    6.10
 -11  -3   2   -1.50    7.60
 -11  -3   2    0.70    6.50
  10   3  -2   62.09   11.50
  10   3  -2   71.89    8.50
 -10  -3   2   78.59   10.70
 -10  -3   2   70.39   13.80
 -10  -3   2   75.59   11.30
   9   3  -2  246.48   17.80
   9   3  -2  243.88   19.10
   9   3  -2  222.38   13.50
  -9  -3   2  239.88   14.90
  -9  -3   2  234.78   18.60
  -9  -3   2  220.28   15.80
   8   3  -2  126.39   12.00
   8   3  -2  101.39    8.80
   8   3  -2  129.49   13.20
  -8  -3   2  106.69   12.30
  -8  -3   2  114.99   10.80
  -8  -3   2   95.99    9.50
  -8  -3   2  101.59   12.80
   7   3  -2  123.59   11.10
   7   3  -2  108.69   12.20
   7   3  -2  110.49    8.50
   7   3  -2  127.89   11.40
  -7  -3   2  114.89   11.30
  -7  -3   2  125.39    9.30
  -7  -3   2  121.69   10.10
  -7  -3   2  127.39   12.20
   6   3  -2   90.69    7.20
   6   3  -2   96.89    9.20
   6   3  -2   88.89    9.10
   6   3  -2  108.59   11.00
  -6  -3   2   77.09    9.10
  -6  -3   2   87.99    8.90
  -6  -3   2  106.99    7.40
  -6  -3   2   98.69    8.40
  -6  -3   2   69.19    9.10
   5   3  -2  308.67   16.20
   5   3  -2  301.67   15.90
   5   3  -2  308.57   17.30
   5   3  -2  305.17   13.70
  -5  -3   2  306.07   13.40
  -5  -3   2  299.77   14.40
  -5  -3   2  283.07   15.90
  -5  -3   2  305.47   15.90
  -5  -3   2  288.77   13.40
   4   3  -2  696.93   28.90
   4   3  -2  685.73   26.10
   4   3  -2  681.93   29.40
   4   3  -2  632.14   27.80
   4   3  -2  660.93   28.20
  -4  -3   2  677.53   28.20
  -4  -3   2  695.83   28.00
  -4  -3   2  653.43   27.70
  -4  -3   2  704.43   29.10
  -4  -3   2  698.83   25.50
  -4  -3   2  667.53   26.50
  -4  -3   2  681.23   25.70
   3   3  -2 1364.56   51.69
   3   3  -2 1354.96   50.99
   3   3  -2 1388.36   49.80
   3   3  -2 1325.57   50.29
   3   3  -2 1329.97   50.59
   3   3  -2 1366.86   48.90
  -3  -3   2 1344.47   50.49
  -3  -3   2 1373.06   50.39
  -3  -3   2 1378.36   48.80
  -3  -3   2 1358.56   47.80
  -3  -3   2 1342.27   49.90
  -3  -3   2 1356.86   51.09
   2   3  -2  151.58    6.90
   2   3  -2  151.38    8.10
   2   3  -2  156.88    7.60
   2   3  -2  154.08    8.30
   2   3  -2  159.08    9.10
   2   3  -2  154.78    8.40
  -2  -3   2  151.38    8.20
  -2  -3   2  160.38    7.20
  -2  -3   2  153.88    8.00
   1   3  -2  273.97   11.60
   1   3  -2  253.17   10.90
   1   3  -2  245.28   10.40
  -1  -3   2  277.37   10.30
  -1  -3   2  251.27   10.30
   0   3  -2  969.60   36.10
   0   3  -2 1030.40   37.00
   0   3  -2 1005.00   36.00
   0   3  -2  998.70   35.80
   0  -3   2 1000.10   36.30
   0  -3   2 1051.69   37.20
  -1   3  -2  250.47   10.70
  -1   3  -2  244.48   10.50
  -1   3  -2  229.58   10.40
   1  -3   2  242.48   11.10
   1  -3   2  206.68   10.50
  -2   3  -2  138.29    6.40
  -2   3  -2  121.49    7.70
  -2   3  -2  111.39    7.60
  -2   3  -2  133.99    6.40
   2  -3   2  132.59    7.70
   2  -3   2  115.89    7.80
   2  -3   2  132.29    7.90
  -3   3  -2  130.09    7.50
  -3   3  -2  129.09    8.70
  -3   3  -2  132.29    8.80
  -3   3  -2  141.49    7.70
   3  -3   2  139.49    8.50
   3  -3   2  114.89    5.70
   3  -3   2  132.79    8.40
  -4   3  -2    9.20    4.30
  -4   3  -2   17.70    3.00
  -4   3  -2   14.40    4.00
  -4   3  -2   22.20    5.30
  -4   3  -2   17.70    4.10
  -4   3  -2   18.50    2.90
  -4   3  -2   21.70    4.10
   4  -3   2   16.80    4.40
   4  -3   2   19.20    3.20
   4  -3   2   12.90    4.00
  -5   3  -2  464.15   20.80
  -5   3  -2  467.75   21.10
  -5   3  -2  451.65   21.90
  -5   3  -2  424.46   18.70
  -5   3  -2  432.86   21.30
  -5   3  -2  462.85   20.60
   5  -3   2  410.96   21.40
   5  -3   2  468.05   19.20
   5  -3   2  470.25   21.20
  -6   3  -2  461.85   22.50
  -6   3  -2  449.76   22.10
  -6   3  -2  432.86   20.10
  -6   3  -2  450.95   22.60
  -6   3  -2  473.25   22.40
   6  -3   2  473.75   23.20
   6  -3   2  458.95   20.30
  -7   3  -2   31.30    7.40
  -7   3  -2   44.30    8.80
  -7   3  -2   45.60    7.20
  -7   3  -2   22.60    6.90
  -7   3  -2   31.00    7.30
   7  -3   2   35.10    6.50
   7  -3   2   33.40    7.90
  -8   3  -2   81.29   11.70
  -8   3  -2   87.69   11.70
  -8   3  -2   83.19    9.60
  -8   3  -2   52.39   11.20
   8  -3   2   97.09   11.40
  -9   3  -2    5.60    6.90
  -9   3  -2    0.10    5.20
  -9   3  -2   -0.10    6.50
  -9   3  -2    9.20    7.10
   9  -3   2   -4.50    5.30
   9  -3   2    6.70    6.80
 -10   3  -2   12.40    6.60
 -10   3  -2   11.90    8.50
 -10   3  -2    5.90    7.70
 -10   3  -2   15.10    8.60
  10  -3   2    7.10    7.30
  10  -3   2   18.70    8.10
 -11   3  -2   23.30    8.20
 -11   3  -2   13.30    9.60
 -11   3  -2   16.10    9.40
 -11   3  -2   28.80   10.30
  11  -3   2   27.00    9.90
  11   2  -2  159.28   18.40
  11   2  -2  165.28   12.00
 -11  -2   2  156.98   15.50
 -11  -2   2  165.18   15.50
 -11  -2   2  164.88   19.20
  10   2  -2   76.99   11.90
  10   2  -2   89.29    8.90
 -10  -2   2  104.49   12.40
 -10  -2   2   89.99   12.00
 -10  -2   2   89.79   15.20
   9   2  -2   92.49    8.60
   9   2  -2  106.09   12.10
   9   2  -2   96.19   16.50
  -9  -2   2  106.49   11.60
  -9  -2   2  105.89   14.20
  -9  -2   2  129.49   11.60
   8   2  -2   15.20    6.80
   8   2  -2    6.50    3.80
   8   2  -2   14.40    5.80
  -8  -2   2   14.30    6.80
  -8  -2   2   13.00    5.60
  -8  -2   2   12.70    5.30
  -8  -2   2    5.60    6.40
   7   2  -2  190.18   14.70
   7   2  -2  186.88   13.40
   7   2  -2  198.18   13.70
   7   2  -2  179.48   10.50
  -7  -2   2  187.58   11.90
  -7  -2   2  194.38   14.80
  -7  -2   2  177.38   12.30
  -7  -2   2  151.98   13.30
   6   2  -2  158.28    9.20
   6   2  -2  159.58   11.50
   6   2  -2  147.59   12.80
   6   2  -2  167.48   11.80
  -6  -2   2  164.18   10.90
  -6  -2   2  181.28   13.10
  -6  -2   2  166.38   12.10
  -6  -2   2  164.48   13.00
  -6  -2   2  177.88   10.40
  -6  -2   2  173.48   12.40
   5   2  -2  249.88   13.60
   5   2  -2  263.07   14.70
   5   2  -2  224.88   13.30
   5   2  -2  228.28   14.50
   5   2  -2  242.48   11.30
  -5  -2   2  238.18   13.70
  -5  -2   2  219.48   11.10
  -5  -2   2  248.18   14.70
  -5  -2   2  213.28   12.30
  -5  -2   2  219.18   13.50
  -5  -2   2  238.98   11.80
  -5  -2   2  234.08   14.10
   4   2  -2   67.79    6.60
   4   2  -2   74.59    7.80
   4   2  -2   80.79    5.50
   4   2  -2   68.19    7.40
   4   2  -2   81.49    7.10
  -4  -2   2   70.09    6.10
  -4  -2   2   79.89    5.60
  -4  -2   2   71.59    6.70
  -4  -2   2   78.69    7.10
  -4  -2   2   61.39    7.30
  -4  -2   2   60.69    4.90
  -4  -2   2   61.49    6.90
   3   2  -2  947.61   37.30
   3   2  -2  907.21   36.60
   3   2  -2  953.30   34.60
   3   2  -2  942.21   35.50
   3   2  -2  957.80   36.40
   3   2  -2  970.90   36.50
  -3  -2   2  949.71   34.50
  -3  -2   2  942.21   36.30
  -3  -2   2  941.61   35.20
  -3  -2   2  979.50   34.50
  -3  -2   2  918.81   36.80
  -3  -2   2  930.91   36.20
   2   2  -2 2555.84   88.69
   2   2  -2 2432.86   87.99
   2   2  -2 2502.15   89.39
   2   2  -2 2521.95   89.29
   2   2  -2 2438.26   89.89
   2   2  -2 2507.55   89.49
  -2  -2   2 2536.85   87.79
  -2  -2   2 2508.55   88.99
  -2  -2   2 2540.55   89.19
  -2  -2   2 2576.54   89.79
  -2  -2   2 2488.25   88.19
  -2  -2   2 2536.05   89.29
   1   2  -2  555.24   20.90
   1   2  -2  537.65   21.50
   1   2  -2  568.24   21.10
  -1  -2   2  553.84   20.20
  -1  -2   2  556.84   21.20
  -1  -2   2  562.34   20.90
   0   2  -2  771.12   28.20
   0   2  -2  797.92   28.60
   0   2  -2  812.72   28.30
   0   2  -2  790.62   28.50
   0  -2   2  764.42   28.30
   0  -2   2  796.02   28.70
  -1   2  -2    2.20    1.60
  -1   2  -2    0.10    1.90
  -1   2  -2    1.00    2.00
  -1   2  -2    2.40    1.30
   1  -2   2    2.90    2.20
   1  -2   2    0.00    1.80
  -2   2  -2   76.89    4.90
  -2   2  -2   82.09    5.90
  -2   2  -2   79.59    5.80
  -2   2  -2   76.29    4.90
   2  -2   2   74.19    5.70
   2  -2   2   74.89    4.10
   2  -2   2   70.09    4.10
   2  -2   2   87.49    5.70
   2  -2   2   71.09    5.20
   2  -2   2   77.49    4.10
  -3   2  -2  303.07   14.30
  -3   2  -2  302.47   13.70
  -3   2  -2  306.87   14.50
  -3   2  -2  317.57   12.20
  -3   2  -2  319.37   13.80
   3  -2   2  321.67   14.70
   3  -2   2  296.77   12.80
   3  -2   2  298.27   12.90
  -4   2  -2  404.36   17.30
  -4   2  -2  364.86   18.10
  -4   2  -2  384.76   17.60
  -4   2  -2  397.66   15.90
  -4   2  -2  389.36   17.90
  -4   2  -2  375.36   17.40
   4  -2   2  384.86   18.20
   4  -2   2  374.96   16.60
   4  -2   2  386.06   16.50
  -5   2  -2   18.70    4.80
  -5   2  -2   12.50    4.80
  -5   2  -2   11.30    4.20
  -5   2  -2   15.80    4.80
  -5   2  -2   26.20    6.00
  -5   2  -2   10.20    3.50
   5  -2   2   19.60    4.90
   5  -2   2   13.10    3.60
  -6   2  -2   -1.00    3.80
  -6   2  -2    1.20    3.80
  -6   2  -2    1.80    3.60
  -6   2  -2   -0.20    4.00
  -6   2  -2    0.50    4.00
  -6   2  -2    0.80    4.40
   6  -2   2    1.40    3.00
   6  -2   2   -0.40    3.50
  -7   2  -2   -0.60    4.20
  -7   2  -2    2.30    4.10
  -7   2  -2   -2.30    4.40
  -7   2  -2    0.40    4.50
  -7   2  -2   -3.20    4.90
   7  -2   2   -3.50    4.10
   7  -2   2   -0.20    3.50
  -8   2  -2   79.39   11.80
  -8   2  -2   59.69   10.80
  -8   2  -2   49.90    8.60
  -8   2  -2   55.49   10.30
   8  -2   2   64.19   11.10
   8  -2   2   56.79    9.50
  -9   2  -2   37.30    7.90
  -9   2  -2   60.69   11.00
  -9   2  -2   44.50    9.80
  -9   2  -2   63.59   12.10
   9  -2   2   51.29   10.10
 -10   2  -2  121.29   15.00
 -10   2  -2   96.69   12.20
 -10   2  -2   86.49   14.60
 -10   2  -2  106.99   15.30
  10  -2   2  106.79   13.90
 -11   2  -2  126.79   16.40
 -11   2  -2  109.39   17.00
 -11   2  -2   73.89   12.80
 -11   2  -2  116.39   17.20
  11   1  -2   11.90    5.10
 -11  -1   2   11.70    6.90
 -11  -1   2   13.80    9.80
 -11  -1   2    7.10    7.50
  10   1  -2   -2.90    5.60
  10   1  -2    2.00    3.80
 -10  -1   2   -3.10    5.70
 -10  -1   2   -0.80    7.80
 -10  -1   2   -0.20    5.80
   9   1  -2   18.70    4.70
   9   1  -2   24.30    7.40
  -9  -1   2   18.10    7.80
  -9  -1   2   15.60    6.50
  -9  -1   2   18.20    7.60
  -9  -1   2   17.30    6.70
   8   1  -2   79.69   11.00
   8   1  -2   72.09    9.70
   8   1  -2   59.09    6.60
  -8  -1   2   69.99   11.80
  -8  -1   2   60.49   10.70
  -8  -1   2   66.99    9.10
  -8  -1   2   71.79    9.30
   7   1  -2   10.50    3.30
   7   1  -2    3.90    4.20
   7   1  -2    4.00    4.70
  -7  -1   2   19.00    6.50
  -7  -1   2    7.00    5.50
  -7  -1   2    4.70    4.30
  -7  -1   2    5.00    4.70
  -7  -1   2    5.60    4.30
   6   1  -2   -2.90    3.10
   6   1  -2    3.60    3.70
   6   1  -2   -0.40    3.90
   6   1  -2    2.80    2.50
   6   1  -2   -3.90    3.20
  -6  -1   2    1.80    3.30
  -6  -1   2    3.10    3.40
  -6  -1   2    0.00    3.60
  -6  -1   2    6.80    4.50
  -6  -1   2    1.00    3.70
  -6  -1   2    5.00    4.40
   5   1  -2   92.39    8.40
   5   1  -2  119.49    9.20
   5   1  -2  102.89    9.60
   5   1  -2  104.49    9.30
   5   1  -2  113.99    6.80
  -5  -1   2   94.99    9.40
  -5  -1   2  106.09    8.00
  -5  -1   2  111.19    9.10
  -5  -1   2  105.89    8.90
  -5  -1   2  106.49    8.00
  -5  -1   2   94.19    9.40
   4   1  -2    0.00    3.10
   4   1  -2    1.80    2.60
   4   1  -2   -0.10    3.10
   4   1  -2   -0.80    2.40
   4   1  -2    2.50    1.90
   4   1  -2    1.80    3.00
  -4  -1   2   -3.40    3.00
  -4  -1   2    4.80    3.20
  -4  -1   2    2.90    1.90
  -4  -1   2    1.80    3.40
  -4  -1   2    0.90    2.70
  -4  -1   2    0.40    2.50
  -4  -1   2    0.90    2.90
   3   1  -2  382.66   16.70
   3   1  -2  407.86   15.90
   3   1  -2  411.56   18.20
   3   1  -2  415.56   18.40
   3   1  -2  406.26   17.50
   3   1  -2  400.26   17.70
  -3  -1   2  410.76   16.90
  -3  -1   2  400.76   18.00
  -3  -1   2  407.76   15.90
  -3  -1   2  392.66   17.50
  -3  -1   2  418.86   17.70
  -3  -1   2  403.96   18.20
   2   1  -2   64.99    5.10
   2   1  -2   78.69    6.20
   2   1  -2   88.19    6.00
   2   1  -2   71.39    6.50
   2   1  -2   78.99    4.60
   2   1  -2   70.99    5.60
  -2  -1   2   82.99    4.50
  -2  -1   2   79.99    5.90
  -2  -1   2   73.09    6.20
  -2  -1   2   71.59    5.20
  -2  -1   2   76.99    5.90
  -2  -1   2   80.29    6.30
   1   1  -2    3.70    1.30
   1   1  -2    8.50    2.30
   1   1  -2    5.10    2.00
   1   1  -2    6.70    2.20
   1   1  -2    8.30    1.90
   1   1  -2    3.20    2.40
  -1  -1   2    3.70    1.70
  -1  -1   2    0.00    0.70
  -1  -1   2    2.70    1.90
  -1  -1   2    4.50    1.30
  -1  -1   2    1.90    2.00
   0   1  -2   50.49    3.60
   0   1  -2   49.50    3.20
   0   1  -2   52.19    3.00
   0  -1   2   52.69    2.90
   0  -1   2   49.60    3.40
   0  -1   2   45.80    3.10
  -1   1  -2   42.30    3.50
  -1   1  -2   34.60    3.40
  -1   1  -2   44.00    3.40
  -1   1  -2   36.60    3.50
   1  -1   2   44.40    3.00
   1  -1   2   35.30    3.10
   1  -1   2   34.70    3.30
  -2   1  -2 1028.10   36.90
  -2   1  -2  944.01   35.60
  -2   1  -2 1010.60   37.40
  -2   1  -2 1021.90   36.80
  -2   1  -2 1035.50   35.80
  -2   1  -2  943.91   36.90
   2  -1   2 1030.90   37.10
   2  -1   2 1017.30   36.50
   2  -1   2 1010.60   36.50
   2  -1   2  994.10   37.30
  -3   1  -2    6.10    2.50
  -3   1  -2    5.10    2.80
  -3   1  -2    3.30    2.80
  -3   1  -2    2.60    2.70
  -3   1  -2   -1.40    2.20
  -3   1  -2    4.40    2.20
  -3   1  -2    6.50    1.70
   3  -1   2    4.20    2.20
   3  -1   2    2.70    2.20
   3  -1   2    7.90    3.00
   3  -1   2    3.30    1.40
   3  -1   2    3.30    1.60
   3  -1   2    6.20    2.60
  -4   1  -2    0.40    1.80
  -4   1  -2    1.40    2.40
  -4   1  -2   -0.80    2.60
  -4   1  -2   -2.40    2.80
  -4   1  -2    1.50    2.80
  -4   1  -2    0.00    2.70
  -4   1  -2    3.30    3.00
   4  -1   2    2.50    1.60
   4  -1   2    3.90    2.60
   4  -1   2   -1.00    2.40
   4  -1   2    1.40    1.70
   4  -1   2    1.70    2.60
  -5   1  -2   34.30    6.50
  -5   1  -2   52.39    6.80
  -5   1  -2   45.50    5.80
  -5   1  -2   49.90    6.90
  -5   1  -2   58.19    7.00
  -5   1  -2   53.49    7.60
   5  -1   2   49.20    6.10
   5  -1   2   58.09    4.60
   5  -1   2   54.09    6.70
   5  -1   2   56.09    5.90
   5  -1   2   47.70    6.00
   5  -1   2   44.30    4.00
  -6   1  -2  780.02   31.50
  -6   1  -2  719.13   32.10
  -6   1  -2  675.23   31.70
  -6   1  -2  732.43   30.00
  -6   1  -2  755.12   31.90
  -6   1  -2  728.73   32.20
   6  -1   2  731.63   27.70
   6  -1   2  693.23   30.90
   6  -1   2  742.23   30.30
   6  -1   2  712.53   32.00
   6  -1   2  770.12   28.50
  -7   1  -2  229.98   15.50
  -7   1  -2  270.17   15.60
  -7   1  -2  225.28   13.80
  -7   1  -2  236.88   16.20
  -7   1  -2  251.37   16.40
   7  -1   2  233.28   15.30
   7  -1   2  234.08   11.80
   7  -1   2  234.48   14.60
   7  -1   2  239.68   13.80
   7  -1   2  239.98   11.20
  -8   1  -2  210.88   16.70
  -8   1  -2  240.58   16.80
  -8   1  -2  232.18   14.60
  -8   1  -2  223.98   16.60
  -8   1  -2  203.08   15.20
   8  -1   2  251.67   14.60
   8  -1   2  214.58   15.80
   8  -1   2  197.78   14.70
   8  -1   2  221.58   11.10
  -9   1  -2  108.69   13.70
  -9   1  -2  129.39   13.50
  -9   1  -2   91.59   11.00
  -9   1  -2  111.99   14.00
   9  -1   2  118.59   12.10
   9  -1   2  105.19    7.70
   9  -1   2  111.29   12.50
 -10   1  -2   59.19   13.00
 -10   1  -2   38.90   10.20
 -10   1  -2   54.39   10.60
 -10   1  -2   72.39   12.40
  10  -1   2   54.39   10.90
  10  -1   2   43.70    6.20
 -11   1  -2  344.87   22.90
 -11   1  -2  386.76   28.90
 -11   1  -2  437.86   25.70
 -11   1  -2  380.06   26.90
  11  -1   2  370.96   17.60
  11   0  -2   73.59    8.70
 -11   0   2   63.09   12.10
 -11   0   2   90.69   17.20
 -11   0   2   66.49   13.60
  10   0  -2  114.59    9.40
  10   0  -2  112.19   13.60
 -10   0   2  107.29   13.00
 -10   0   2   97.99   15.90
 -10   0   2  129.99   13.90
   9   0  -2   68.39   11.00
   9   0  -2   58.09    6.90
  -9   0   2   44.70    9.70
  -9   0   2   68.89   10.80
  -9   0   2   36.70    9.30
  -9   0   2   56.49   12.30
   8   0  -2  228.08   12.10
   8   0  -2  226.18   16.50
   8   0  -2  225.18   16.50
  -8   0   2  246.08   18.20
  -8   0   2  242.18   16.90
  -8   0   2  260.97   15.90
  -8   0   2  189.88   16.60
  -8   0   2  238.08   15.30
   7   0  -2  118.69   12.90
   7   0  -2  109.89   11.00
   7   0  -2  104.29    7.30
   7   0  -2   99.39   10.40
  -7   0   2  104.99    9.60
  -7   0   2   92.89   11.70
  -7   0   2   99.99   11.20
  -7   0   2  106.69   10.30
  -7   0   2  109.39   11.00
   6   0  -2  328.47   18.10
   6   0  -2  308.37   17.10
   6   0  -2  322.37   14.60
   6   0  -2  362.16   18.40
   6   0  -2  351.36   18.60
  -6   0   2  330.27   18.90
  -6   0   2  328.67   17.10
  -6   0   2  354.76   17.00
  -6   0   2  302.47   18.50
  -6   0   2  329.17   17.90
  -6   0   2  336.37   18.50
   5   0  -2  170.58   11.50
   5   0  -2  175.58    8.70
   5   0  -2  170.08    9.80
   5   0  -2  165.08   11.30
   5   0  -2  198.08   11.30
   5   0  -2  169.08   11.80
  -5   0   2  165.38   12.00
  -5   0   2  164.58   10.50
  -5   0   2  169.08   12.10
  -5   0   2  178.98   10.50
  -5   0   2  162.08   11.50
  -5   0   2  186.48   11.60
   4   0  -2  835.92   33.80
   4   0  -2  870.91   34.10
   4   0  -2  860.51   32.10
   4   0  -2  795.92   33.30
   4   0  -2  817.92   30.90
   4   0  -2  868.91   33.10
  -4   0   2  829.22   31.10
  -4   0   2  855.01   32.50
  -4   0   2  811.42   33.20
  -4   0   2  803.52   34.00
  -4   0   2  813.42   32.60
  -4   0   2  855.91   33.90
  -4   0   2  816.52   33.90
   3   0  -2 4209.88  152.48
   3   0  -2 4118.99  153.18
   3   0  -2 4347.86  153.08
   3   0  -2 4415.16  151.88
   3   0  -2 4260.67  150.88
  -3   0   2 4338.67  152.08
  -3   0   2 4328.87  153.18
  -3   0   2 4389.66  151.08
  -3   0   2 4356.46  153.48
  -3   0   2 4412.56  152.88
  -3   0   2 4460.45  153.38
   2   0  -2 9999.00  337.97
   2   0  -2 9445.05  338.07
   2   0  -2 9555.44  337.77
   2   0  -2 9338.37  337.37
   2   0  -2 9958.70  336.97
   2   0  -2 9654.23  336.27
  -2   0   2 9930.41  337.87
  -2   0   2 9679.83  338.07
  -2   0   2 9843.81  338.67
  -2   0   2 9645.04  337.47
  -2   0   2 9685.13  337.87
  -2   0   2 9935.21  337.87
   1   0  -2  841.12   31.20
   1   0  -2  868.41   30.90
   1   0  -2  861.91   31.50
   1   0  -2  868.31   31.70
   1   0  -2  853.91   32.00
   1   0  -2  865.01   30.70
   1   0  -2  899.31   31.80
  -1   0   2  876.91   31.50
  -1   0   2  889.51   31.80
  -1   0   2  861.91   31.20
  -1   0   2  878.01   31.70
  -1   0   2  868.91   30.70
  -1   0   2  817.32   31.80
   0   0  -2 3424.66  120.79
   0   0  -2 3538.95  121.19
   0   0  -2 3450.65  120.69
   0   0  -2 3604.34  120.89
   0   0  -2 3389.16  120.59
   0   0   2 3299.07  120.79
   0   0   2 3676.33  121.19
   0   0   2 3473.95  120.79
   0   0   2 3458.95  120.49
   0   0   2 3431.26  120.69
  -1   0  -2 3826.42  130.79
  -1   0  -2 3781.92  131.49
  -1   0  -2 3775.12  131.39
  -1   0  -2 3799.72  130.79
  -1   0  -2 3757.72  131.19
   1   0   2 3694.93  131.29
   1   0   2 3787.12  131.49
   1   0   2 3697.93  131.09
   1   0   2 3815.42  130.79
  -2   0  -2 2622.44   90.99
  -2   0  -2 2599.94   91.79
  -2   0  -2 2582.04   91.89
  -2   0  -2 2627.64   91.69
  -2   0  -2 2500.05   91.69
  -2   0  -2 2624.04   91.49
  -2   0  -2 2600.54   90.79
   2   0   2 2642.74   91.49
   2   0   2 2633.04   91.69
   2   0   2 2672.93   90.79
   2   0   2 2594.64   91.49
   2   0   2 2626.84   91.89
   2   0   2 2503.75   90.59
   2   0   2 2519.35   91.69
  -3   0  -2  474.15   19.80
  -3   0  -2  483.35   19.90
  -3   0  -2  454.95   18.60
  -3   0  -2  498.45   19.40
  -3   0  -2  475.05   18.20
  -3   0  -2  479.05   19.90
  -3   0  -2  469.55   19.80
   3   0   2  489.05   18.10
   3   0   2  459.45   19.40
   3   0   2  474.75   18.30
   3   0   2  477.05   19.80
   3   0   2  471.25   19.30
   3   0   2  494.65   19.40
   3   0   2  447.06   19.50
  -4   0  -2  626.54   25.50
  -4   0  -2  639.34   26.20
  -4   0  -2  654.73   26.20
  -4   0  -2  637.34   24.90
  -4   0  -2  640.84   26.30
  -4   0  -2  603.64   24.00
  -4   0  -2  605.74   26.10
   4   0   2  618.64   24.20
   4   0   2  616.34   25.90
   4   0   2  633.14   26.20
   4   0   2  634.84   23.80
   4   0   2  634.44   25.60
   4   0   2  646.94   25.70
  -5   0  -2   38.40    7.40
  -5   0  -2   24.60    5.70
  -5   0  -2   22.30    5.00
  -5   0  -2   45.40    6.10
  -5   0  -2   25.80    6.20
  -5   0  -2   24.50    5.30
   5   0   2   29.80    4.40
   5   0   2   39.00    4.00
   5   0   2   23.90    5.00
   5   0   2   31.50    5.60
   5   0   2   34.80    5.70
   5   0   2   33.60    5.60
  -6   0  -2  998.70   39.70
  -6   0  -2 1030.10   41.20
  -6   0  -2  944.71   40.50
  -6   0  -2  961.10   40.80
  -6   0  -2  925.71   40.90
  -6   0  -2 1025.00   39.10
   6   0   2  984.10   40.50
   6   0   2  993.60   39.80
   6   0   2  996.40   37.00
   6   0   2 1036.10   41.10
   6   0   2  967.60   40.40
   6   0   2  998.30   37.90
  -7   0  -2  208.88   13.00
  -7   0  -2  218.58   15.00
  -7   0  -2  208.98   15.20
  -7   0  -2  180.48   14.50
  -7   0  -2  208.18   13.70
   7   0   2  202.78   13.80
   7   0   2  216.78   10.60
   7   0   2  220.08   13.60
   7   0   2  196.98   14.00
  -8   0  -2   64.19   10.60
  -8   0  -2   80.99   10.00
  -8   0  -2   54.89   11.10
  -8   0  -2   58.59    8.70
  -8   0  -2   52.49   10.00
   8   0   2   59.29    9.00
   8   0   2   58.49    6.10
   8   0   2   59.59    9.20
  -9   0  -2  159.48   14.00
  -9   0  -2  115.09   13.80
  -9   0  -2  126.59   14.60
  -9   0  -2  106.29   11.80
   9   0   2  123.09   12.90
   9   0   2  121.59    8.70
 -10   0  -2   45.50   11.60
 -10   0  -2   46.30   10.60
 -10   0  -2   33.50    8.90
 -10   0  -2   36.70    9.10
  10   0   2   44.90    6.50
  10   0   2   32.40    8.70
 -11   0  -2   35.10    9.30
 -11   0  -2   13.70    9.40
 -11   0  -2   14.50    8.60
  11   0   2   18.80    4.80
  11   0   2   16.90    8.10
 -12   0  -2    7.20    8.30
  12   0   2   15.00    5.10
  11  -1  -2  161.98   16.40
 -11   1   2  171.48   19.60
 -11   1   2  158.88   16.10
 -11   1   2  183.28   18.00
  10  -1  -2  139.89   15.00
 -10   1   2  120.49   16.50
 -10   1   2  111.99   13.40
 -10   1   2  127.39   16.30
 -10   1   2  151.88   15.30
   9  -1  -2  164.48   15.10
   9  -1  -2  176.38   10.40
  -9   1   2  186.88   15.30
  -9   1   2  196.08   17.60
  -9   1   2  149.49   13.70
  -9   1   2  161.88   15.90
   8  -1  -2   84.79   10.00
   8  -1  -2   93.79   11.10
   8  -1  -2   93.79    7.30
  -8   1   2   96.59   12.30
  -8   1   2   83.59   11.30
  -8   1   2   96.79   11.00
  -8   1   2   83.89   10.00
   7  -1  -2   31.40    4.80
   7  -1  -2   39.10    7.40
   7  -1  -2   36.20    7.50
   7  -1  -2   35.90    6.80
  -7   1   2   25.80    5.90
  -7   1   2   27.80    6.80
  -7   1   2   43.00    8.20
  -7   1   2   40.50    8.70
  -7   1   2   23.10    6.70
   6  -1  -2  407.06   18.90
   6  -1  -2  368.46   15.50
   6  -1  -2  375.66   16.60
   6  -1  -2  322.37   18.40
   6  -1  -2  364.26   19.50
  -6   1   2  356.26   19.80
  -6   1   2  377.06   19.30
  -6   1   2  360.56   18.70
  -6   1   2  342.67   19.60
  -6   1   2  348.87   17.60
   5  -1  -2 1855.41   69.09
   5  -1  -2 1900.21   66.69
   5  -1  -2 1909.21   69.59
   5  -1  -2 1686.73   69.69
   5  -1  -2 1935.01   70.89
   5  -1  -2 1950.80   67.79
  -5   1   2 1853.21   69.79
  -5   1   2 1813.02   69.59
  -5   1   2 1884.11   70.69
  -5   1   2 1877.31   68.69
  -5   1   2 1775.42   70.49
  -5   1   2 1924.31   70.89
   4  -1  -2  533.45   22.80
   4  -1  -2  522.65   22.30
   4  -1  -2  520.85   20.30
   4  -1  -2  565.54   23.90
   4  -1  -2  554.64   21.40
  -4   1   2  530.55   22.00
  -4   1   2  528.65   22.80
  -4   1   2  538.25   20.60
  -4   1   2  538.65   23.50
  -4   1   2  554.74   23.70
  -4   1   2  495.55   23.30
   3  -1  -2   10.10    3.20
   3  -1  -2    7.50    2.20
   3  -1  -2    4.30    2.70
   3  -1  -2    8.50    2.60
  -3   1   2   11.90    3.30
  -3   1   2    4.00    3.10
  -3   1   2    7.20    1.90
  -3   1   2    3.40    2.50
  -3   1   2    6.50    2.80
  -3   1   2    9.30    2.90
   2  -1  -2 1795.22   63.59
   2  -1  -2 1817.92   63.29
   2  -1  -2 1824.92   64.19
   2  -1  -2 1797.42   62.69
   2  -1  -2 1732.13   63.49
  -2   1   2 1768.12   63.79
  -2   1   2 1738.13   63.89
  -2   1   2 1712.93   63.29
  -2   1   2 1793.02   62.99
  -2   1   2 1781.82   63.99
  -2   1   2 1727.43   62.19
   1  -1  -2  115.19    6.50
   1  -1  -2  148.79    7.10
   1  -1  -2  140.89    6.40
   1  -1  -2  140.39    6.80
   1  -1  -2  141.29    6.10
   1  -1  -2  139.39    6.90
  -1   1   2  147.29    7.00
  -1   1   2  136.19    6.70
  -1   1   2  136.79    6.90
  -1   1   2  139.49    6.60
  -1   1   2  148.89    6.30
  -1   1   2  135.19    7.00
   0  -1  -2 2641.44   92.49
   0  -1  -2 2611.84   91.59
   0  -1  -2 2632.54   91.99
   0  -1  -2 2632.34   91.99
   0  -1  -2 2636.54   91.49
   0   1   2 2631.14   91.69
   0   1   2 2707.13   92.09
   0   1   2 2629.64   92.49
   0   1   2 2598.44   91.99
   0   1   2 2690.73   91.49
   0   1   2 2606.54   92.29
  -1  -1  -2 2104.89   80.09
  -1  -1  -2 2327.57   79.49
  -1  -1  -2 2260.97   79.59
  -1  -1  -2 2372.46   80.19
  -1  -1  -2 2239.58   79.89
  -1  -1  -2 2263.07   79.99
   1   1   2 2293.47   79.49
   1   1   2 2292.77   80.19
   1   1   2 2317.87   80.29
   1   1   2 2263.57   79.59
   1   1   2 2272.67   79.79
   1   1   2 2352.36   79.99
  -2  -1  -2  162.68    7.20
  -2  -1  -2  147.99    7.50
  -2  -1  -2  152.98    7.50
  -2  -1  -2  154.28    7.70
  -2  -1  -2  130.09    8.10
  -2  -1  -2  146.89    8.30
  -2  -1  -2  168.88    8.40
   2   1   2  153.58    7.10
   2   1   2  169.68    8.30
   2   1   2  154.58    7.40
   2   1   2  161.28    8.30
   2   1   2  159.98    7.80
   2   1   2  149.69    8.20
   2   1   2  168.98    7.40
  -3  -1  -2  347.07   14.70
  -3  -1  -2  321.27   13.40
  -3  -1  -2  328.27   14.00
  -3  -1  -2  331.67   15.00
  -3  -1  -2  338.17   14.10
  -3  -1  -2  345.87   15.30
  -3  -1  -2  318.37   15.00
   3   1   2  331.77   13.80
   3   1   2  333.77   14.80
   3   1   2  348.77   14.80
   3   1   2  318.67   13.30
   3   1   2  327.07   15.00
   3   1   2  336.47   14.60
   3   1   2  321.67   13.90
  -4  -1  -2   48.80    4.50
  -4  -1  -2   47.00    6.10
  -4  -1  -2   57.59    5.30
  -4  -1  -2   53.49    5.70
  -4  -1  -2   49.70    6.70
  -4  -1  -2   46.30    6.30
  -4  -1  -2   65.29    5.60
   4   1   2   55.69    4.40
   4   1   2   52.89    5.80
   4   1   2   48.70    6.10
   4   1   2   45.70    5.80
   4   1   2   63.59    6.00
   4   1   2   51.49    4.70
  -5  -1  -2  210.38   13.10
  -5  -1  -2  237.68   12.20
  -5  -1  -2  215.48   12.70
  -5  -1  -2  253.17   12.30
  -5  -1  -2  230.48   13.90
  -5  -1  -2  208.78   13.40
   5   1   2  225.88   12.80
   5   1   2  222.88   12.90
   5   1   2  216.08   12.50
   5   1   2  230.28   13.30
   5   1   2  233.28   10.70
   5   1   2  214.78   11.30
  -6  -1  -2  293.17   14.70
  -6  -1  -2  266.57   15.60
  -6  -1  -2  255.37   14.20
  -6  -1  -2  298.27   16.80
  -6  -1  -2  274.57   16.40
  -6  -1  -2  266.97   15.90
   6   1   2  269.27   15.20
   6   1   2  270.27   12.70
   6   1   2  274.77   15.40
   6   1   2  266.17   15.30
   6   1   2  280.97   16.00
  -7  -1  -2  157.28   13.60
  -7  -1  -2  164.58   11.50
  -7  -1  -2  165.38   11.50
  -7  -1  -2  164.08   13.40
  -7  -1  -2  148.59   12.60
   7   1   2  161.88    9.40
   7   1   2  164.18   12.20
   7   1   2  157.58   12.50
  -8  -1  -2   -0.10    4.50
  -8  -1  -2    3.30    5.20
  -8  -1  -2   -1.10    4.60
  -8  -1  -2    4.80    5.40
  -8  -1  -2    3.50    5.70
   8   1   2    1.30    4.20
   8   1   2    9.90    5.00
   8   1   2    0.40    3.10
  -9  -1  -2   17.80    8.30
  -9  -1  -2   34.50    7.60
  -9  -1  -2   18.90    6.60
  -9  -1  -2   25.70    8.10
   9   1   2   42.70    9.30
   9   1   2   15.00    4.30
 -10  -1  -2   -1.70    6.30
 -10  -1  -2    4.70    7.30
 -10  -1  -2   -4.00    7.00
 -10  -1  -2   10.60    6.60
  10   1   2   -4.40    4.90
  10   1   2    1.20    3.70
 -11  -1  -2   51.99   11.70
 -11  -1  -2   14.90    9.70
 -11  -1  -2   28.20    8.80
  11   1   2   11.90    4.90
  11   1   2   29.30    8.80
 -12  -1  -2    3.70    8.50
 -12  -1  -2    3.50    7.90
  12   1   2    1.50    4.60
  11  -2  -2  146.39   16.10
 -11   2   2  121.39   15.90
 -11   2   2  127.59   14.90
 -11   2   2  100.99   17.60
  10  -2  -2    0.60    5.90
  10  -2  -2   -2.60    6.10
 -10   2   2    4.30    6.20
 -10   2   2   -8.60    6.30
 -10   2   2    3.80    7.20
 -10   2   2   -2.90    6.20
   9  -2  -2  238.18   18.00
   9  -2  -2  227.08   17.00
  -9   2   2  209.18   17.70
  -9   2   2  198.18   15.50
  -9   2   2  231.88   17.40
  -9   2   2  240.68   19.20
   8  -2  -2   -3.20    4.30
   8  -2  -2   -0.30    4.50
   8  -2  -2   -0.60    3.70
  -8   2   2    0.90    5.60
  -8   2   2   -1.00    5.40
  -8   2   2   -4.10    4.70
  -8   2   2   -2.90    4.10
   7  -2  -2  184.18   13.30
   7  -2  -2  194.48   12.30
   7  -2  -2  222.28   14.90
   7  -2  -2  163.18   12.60
  -7   2   2  197.48   12.80
  -7   2   2  170.48   13.60
  -7   2   2  187.08   13.70
  -7   2   2  144.49   13.50
  -7   2   2  149.39   14.10
   6  -2  -2  111.99    8.70
   6  -2  -2   95.79    9.80
   6  -2  -2  115.69    9.60
   6  -2  -2  111.19    9.40
   6  -2  -2  117.69    7.10
  -6   2   2  102.99    8.90
  -6   2   2   88.89    9.90
  -6   2   2   96.49    9.80
  -6   2   2  120.69   10.10
  -6   2   2  120.69   11.10
   5  -2  -2   96.09    8.10
   5  -2  -2   96.49    8.70
   5  -2  -2   93.59    7.40
   5  -2  -2   86.39    8.00
  -5   2   2   93.49    8.70
  -5   2   2   91.39    7.60
  -5   2   2   96.59    9.10
  -5   2   2   80.89    7.90
  -5   2   2   92.29    9.30
  -5   2   2   84.89    8.70
   4  -2  -2  490.65   21.00
   4  -2  -2  487.85   22.00
   4  -2  -2  512.55   21.90
   4  -2  -2  521.95   21.10
   4  -2  -2  510.85   22.80
  -4   2   2  513.05   20.90
  -4   2   2  509.25   21.80
  -4   2   2  516.35   22.90
  -4   2   2  520.05   19.70
  -4   2   2  492.55   22.50
  -4   2   2  512.95   22.40
   3  -2  -2    5.00    2.60
   3  -2  -2    3.70    2.30
   3  -2  -2    8.70    3.30
   3  -2  -2    6.90    3.10
   3  -2  -2    6.00    2.50
  -3   2   2    8.40    3.20
  -3   2   2    9.30    2.90
  -3   2   2   10.50    3.40
  -3   2   2   10.10    3.50
  -3   2   2    8.80    1.80
  -3   2   2   12.20    2.80
   2  -2  -2  319.77   13.50
   2  -2  -2  334.97   15.10
   2  -2  -2  340.07   13.30
   2  -2  -2  339.07   14.10
   2  -2  -2  323.77   14.80
  -2   2   2  350.76   14.60
  -2   2   2  346.87   14.80
  -2   2   2  355.36   14.30
  -2   2   2  346.67   13.90
  -2   2   2  329.27   13.30
  -2   2   2  340.27   14.50
   1  -2  -2   69.59    3.80
   1  -2  -2   61.99    4.60
   1  -2  -2   65.69    5.70
   1  -2  -2   66.89    4.10
  -1   2   2   65.49    5.40
  -1   2   2   64.59    4.60
  -1   2   2   64.99    4.20
  -1   2   2   66.69    4.10
  -1   2   2   67.09    4.50
   0  -2  -2   54.59    3.20
   0  -2  -2   53.99    4.80
   0  -2  -2   50.69    3.00
   0  -2  -2   52.59    3.40
   0   2   2   47.50    2.90
   0   2   2   52.89    3.40
   0   2   2   59.19    4.80
   0   2   2   49.90    3.50
   0   2   2   43.00    2.90
  -1  -2  -2 2156.28   75.19
  -1  -2  -2 2162.38   75.79
  -1  -2  -2 2138.69   75.79
  -1  -2  -2 2217.78   75.89
  -1  -2  -2 2095.79   75.39
   1   2   2 2168.68   75.99
   1   2   2 2219.88   75.79
   1   2   2 2176.28   75.89
   1   2   2 2057.59   75.69
  -2  -2  -2   70.29    5.80
  -2  -2  -2   80.29    5.40
  -2  -2  -2   74.29    4.80
  -2  -2  -2   78.09    4.40
  -2  -2  -2   73.89    4.90
  -2  -2  -2   76.49    5.70
   2   2   2   78.29    4.80
   2   2   2   81.89    5.70
   2   2   2   75.49    4.80
   2   2   2   80.09    5.70
   2   2   2   72.89    5.80
   2   2   2   79.69    4.70
   2   2   2   82.39    4.70
  -3  -2  -2  205.88   11.00
  -3  -2  -2  233.98   11.20
  -3  -2  -2  204.18    9.80
  -3  -2  -2  206.38   10.80
  -3  -2  -2  203.28    9.50
  -3  -2  -2  203.08   10.10
  -3  -2  -2  214.38    9.30
   3   2   2  205.48    9.30
   3   2   2  204.78    9.40
   3   2   2  209.88   10.60
   3   2   2  198.38   10.90
   3   2   2  208.18    9.80
   3   2   2  203.68   10.00
   3   2   2  202.28   10.80
  -4  -2  -2  146.19    7.70
  -4  -2  -2  146.29   10.00
  -4  -2  -2  151.38    9.10
  -4  -2  -2  139.09    9.70
  -4  -2  -2  134.89    8.30
  -4  -2  -2  147.89    8.00
  -4  -2  -2  175.48    9.90
   4   2   2  123.19    7.70
   4   2   2  156.68    9.30
   4   2   2  136.29    9.40
   4   2   2  147.29    8.90
   4   2   2  153.08    7.70
   4   2   2  140.99    8.20
   4   2   2  126.39    9.50
  -5  -2  -2    3.20    3.80
  -5  -2  -2    2.60    3.10
  -5  -2  -2    0.70    3.50
  -5  -2  -2    1.60    3.10
  -5  -2  -2    5.30    4.40
  -5  -2  -2    4.00    2.60
  -5  -2  -2    9.30    3.80
   5   2   2    6.30    3.90
   5   2   2    5.40    4.00
   5   2   2    2.30    3.20
   5   2   2    9.00    3.50
   5   2   2    1.80    2.30
  -6  -2  -2   78.99    7.30
  -6  -2  -2   69.09    8.20
  -6  -2  -2   56.09    8.90
  -6  -2  -2   67.29    8.90
  -6  -2  -2   56.29    8.10
  -6  -2  -2   75.39    7.50
   6   2   2   63.29    8.30
   6   2   2   63.49    7.20
   6   2   2   65.89    5.80
   6   2   2   79.89    9.00
   6   2   2   74.79    8.00
  -7  -2  -2  307.47   19.20
  -7  -2  -2  341.17   17.00
  -7  -2  -2  336.37   19.20
  -7  -2  -2  301.37   16.80
  -7  -2  -2  324.57   19.70
   7   2   2  328.77   18.30
   7   2   2  338.67   15.30
   7   2   2  322.27   18.20
   7   2   2  321.77   19.00
  -8  -2  -2  154.78   13.90
  -8  -2  -2  152.38   14.80
  -8  -2  -2  168.58   12.30
  -8  -2  -2  156.38   12.20
   8   2   2  158.58   13.10
   8   2   2  165.28   10.10
   8   2   2  154.38   13.60
  -9  -2  -2   97.29   10.80
  -9  -2  -2   69.69   11.90
  -9  -2  -2   89.79   13.50
  -9  -2  -2   75.99   10.40
   9   2   2   94.99   11.00
   9   2   2   75.09    7.80
   9   2   2   89.09   12.00
 -10  -2  -2   64.39   13.90
 -10  -2  -2   43.60    8.90
 -10  -2  -2   52.09   10.70
  10   2   2   45.10    9.80
  10   2   2   45.70    7.20
 -11  -2  -2    1.50    8.90
 -11  -2  -2   17.30    8.20
 -11  -2  -2    9.70    7.10
  11   2   2    5.60    4.80
  11   2   2   13.10    7.50
 -12  -2  -2  331.47   22.60
  12   2   2  321.07   17.70
  11  -3  -2    4.20    7.80
 -11   3   2    3.30    8.60
 -11   3   2    1.70    7.00
 -11   3   2   11.80    9.50
 -11   3   2   16.30    9.20
  10  -3  -2    3.70    6.40
  10  -3  -2    9.20    7.10
 -10   3   2    4.30    7.10
 -10   3   2   -0.10    7.00
 -10   3   2    2.00    6.20
 -10   3   2   -3.60    6.60
   9  -3  -2  158.08   15.40
   9  -3  -2  162.68   15.10
  -9   3   2  168.98   15.90
  -9   3   2  151.58   13.40
  -9   3   2  169.68   15.80
  -9   3   2  151.98   16.20
   8  -3  -2  130.49   12.80
   8  -3  -2   97.39   11.50
  -8   3   2   88.79   10.30
  -8   3   2   73.69   11.60
  -8   3   2   99.99   12.80
  -8   3   2   86.49   11.70
   7  -3  -2   17.10    6.00
   7  -3  -2   14.80    4.90
   7  -3  -2    5.80    5.20
   7  -3  -2   17.80    4.20
  -7   3   2   20.60    5.70
  -7   3   2   18.00    7.10
  -7   3   2   14.40    6.00
  -7   3   2    7.80    5.70
  -7   3   2   16.90    6.00
   6  -3  -2  108.69    9.00
   6  -3  -2  101.69    7.40
   6  -3  -2   97.79    9.70
   6  -3  -2  100.79   10.20
  -6   3   2  101.59    8.70
  -6   3   2  110.39   10.60
  -6   3   2  110.49   10.60
  -6   3   2  102.69    9.60
  -6   3   2  125.99   11.20
   5  -3  -2   -0.50    3.40
   5  -3  -2    6.40    3.40
   5  -3  -2    2.10    2.40
   5  -3  -2    7.20    4.00
  -5   3   2    5.40    4.00
  -5   3   2    3.20    3.50
  -5   3   2    3.20    4.00
  -5   3   2    4.40    3.30
  -5   3   2    2.70    3.80
  -5   3   2    0.50    3.70
   4  -3  -2  796.42   30.90
   4  -3  -2  732.93   32.50
   4  -3  -2  792.62   32.90
   4  -3  -2  780.72   29.20
  -4   3   2  797.02   30.20
  -4   3   2  769.62   29.00
  -4   3   2  791.92   32.80
  -4   3   2  821.12   31.90
  -4   3   2  797.12   31.30
  -4   3   2  809.22   32.30
   3  -3  -2  170.18    8.20
   3  -3  -2  151.38   10.10
   3  -3  -2  145.79    7.50
   3  -3  -2  176.08   10.00
  -3   3   2  143.19    9.00
  -3   3   2  143.19    9.40
  -3   3   2  164.78    9.00
  -3   3   2  156.88    8.50
   2  -3  -2   17.70    3.60
   2  -3  -2   21.00    4.70
   2  -3  -2   21.90    2.50
   2  -3  -2   21.70    2.40
  -2   3   2   22.00    3.90
  -2   3   2   30.60    3.80
  -2   3   2   26.20    3.30
  -2   3   2   23.60    4.30
  -2   3   2   20.20    3.20
   1  -3  -2  795.42   31.20
   1  -3  -2  739.63   29.40
  -1   3   2  783.42   28.40
  -1   3   2  833.12   28.70
  -1   3   2  729.83   29.20
  -1   3   2  811.52   28.40
  -1   3   2  837.52   30.90
   0  -3  -2  266.67   12.80
   0  -3  -2  244.88   10.40
   0   3   2  276.27   10.20
   0   3   2  274.07   12.70
   0   3   2  272.57   10.40
  -1  -3  -2 2350.46   85.69
  -1  -3  -2 2471.05   86.19
  -1  -3  -2 2498.25   86.19
   1   3   2 2608.74   86.99
   1   3   2 2502.95   86.09
   1   3   2 2478.95   86.79
   1   3   2 2400.36   86.29
   1   3   2 2442.96   86.89
  -2  -3  -2   17.80    3.50
  -2  -3  -2   20.40    3.30
  -2  -3  -2   22.40    3.60
  -2  -3  -2   18.70    3.20
  -2  -3  -2   20.50    2.80
   2   3   2   24.40    3.80
   2   3   2   28.10    4.10
   2   3   2   22.50    2.90
   2   3   2   27.30    3.90
   2   3   2   21.50    2.90
   2   3   2   24.10    2.60
   2   3   2   25.40    3.00
  -3  -3  -2   66.19    5.10
  -3  -3  -2   65.19    6.10
  -3  -3  -2   67.79    4.80
  -3  -3  -2   59.79    5.70
  -3  -3  -2   62.39    4.20
  -3  -3  -2   72.79    4.80
  -3  -3  -2   78.09    6.10
   3   3   2   53.39    4.80
   3   3   2   63.19    4.60
   3   3   2   65.89    6.30
   3   3   2   78.19    4.90
   3   3   2   73.99    5.10
   3   3   2   71.89    5.90
   3   3   2   64.49    6.00
  -4  -3  -2  913.31   35.90
  -4  -3  -2  898.31   35.50
  -4  -3  -2  884.51   33.60
  -4  -3  -2  894.01   33.30
  -4  -3  -2  909.21   34.80
  -4  -3  -2  896.51   33.90
   4   3   2  858.41   35.20
   4   3   2  874.31   35.90
   4   3   2  919.61   33.50
   4   3   2  876.21   35.70
   4   3   2  879.61   33.50
   4   3   2  907.21   34.60
   4   3   2  915.71   34.80
  -5  -3  -2 1109.59   41.50
  -5  -3  -2 1091.99   41.70
  -5  -3  -2 1124.29   44.10
  -5  -3  -2 1070.69   42.10
  -5  -3  -2 1192.98   44.90
  -5  -3  -2 1136.79   44.30
  -5  -3  -2 1112.59   43.50
   5   3   2 1129.39   44.30
   5   3   2 1138.29   44.80
   5   3   2 1155.78   41.60
   5   3   2 1001.20   43.40
   5   3   2 1098.19   43.20
  -6  -3  -2  594.94   25.80
  -6  -3  -2  653.03   29.00
  -6  -3  -2  596.14   26.30
  -6  -3  -2  607.84   28.30
  -6  -3  -2  651.03   28.20
   6   3   2  658.23   27.90
   6   3   2  642.74   28.20
   6   3   2  611.24   25.30
   6   3   2  670.73   29.50
  -7  -3  -2  584.24   28.40
  -7  -3  -2  548.25   25.50
  -7  -3  -2  566.74   27.80
  -7  -3  -2  593.24   27.50
  -7  -3  -2  569.24   25.00
   7   3   2  554.94   27.20
   7   3   2  632.04   28.90
   7   3   2  590.14   27.10
   7   3   2  576.74   24.20
  -8  -3  -2  136.49   11.10
  -8  -3  -2  169.78   14.30
  -8  -3  -2  156.38   14.70
  -8  -3  -2  127.19   11.50
   8   3   2  125.79   11.90
   8   3   2  159.88   13.10
   8   3   2  172.28   10.40
   8   3   2  150.78   13.90
  -9  -3  -2  503.55   24.50
  -9  -3  -2  460.15   27.30
  -9  -3  -2  486.75   23.50
   9   3   2  455.85   21.50
   9   3   2  440.16   24.90
   9   3   2  479.15   27.00
 -10  -3  -2   39.40    8.40
 -10  -3  -2   44.30    9.10
 -10  -3  -2   44.80   11.50
  10   3   2   55.39   10.10
  10   3   2   48.50    7.50
 -11  -3  -2  216.48   20.90
 -11  -3  -2  207.48   16.80
 -11  -3  -2  213.58   16.70
  11   3   2  162.98   16.50
  11   3   2  165.58   12.40
  10  -4  -2   10.20    8.20
  10  -4  -2   27.90    9.40
 -10   4   2   18.20    7.30
 -10   4   2   33.80   10.20
 -10   4   2   17.00    8.90
 -10   4   2   31.70   10.50
   9  -4  -2   80.09   12.70
   9  -4  -2   51.29   11.20
  -9   4   2   61.29   12.20
  -9   4   2   65.59   10.70
  -9   4   2   51.09   12.30
  -9   4   2   85.89   13.50
   8  -4  -2  127.59   13.60
   8  -4  -2  116.19   13.40
  -8   4   2  123.09   11.50
  -8   4   2  154.28   13.90
  -8   4   2  104.49   13.30
  -8   4   2  120.99   14.00
   7  -4  -2   83.79   11.20
   7  -4  -2   93.29    8.70
   7  -4  -2   95.59   11.50
  -7   4   2   92.59   11.40
  -7   4   2  106.69   12.10
  -7   4   2  108.59    9.60
  -7   4   2  102.79   11.70
  -7   4   2   91.39   10.90
   6  -4  -2   33.70    5.50
   6  -4  -2   11.60    5.00
   6  -4  -2   15.90    5.90
  -6   4   2   17.40    5.60
  -6   4   2   10.20    5.40
  -6   4   2   30.40    6.90
  -6   4   2   21.70    5.10
  -6   4   2   22.30    6.40
   5  -4  -2  548.45   27.40
   5  -4  -2  632.84   27.80
   5  -4  -2  585.44   24.30
  -5   4   2  578.64   27.40
  -5   4   2  597.14   26.30
  -5   4   2  627.44   28.00
  -5   4   2  606.74   26.00
  -5   4   2  605.04   26.90
  -5   4   2  606.14   24.50
   4  -4  -2 1215.98   49.60
   4  -4  -2 1268.07   49.00
   4  -4  -2 1246.18   45.50
  -4   4   2 1275.07   49.00
  -4   4   2 1218.18   44.70
  -4   4   2 1266.07   47.10
  -4   4   2 1254.57   47.30
  -4   4   2 1244.18   47.90
   3  -4  -2   -6.20    2.60
   3  -4  -2    6.20    4.00
  -3   4   2    2.30    3.10
  -3   4   2    1.40    2.50
  -3   4   2    0.50    2.50
  -3   4   2    1.40    2.20
   2  -4  -2 1606.54   60.99
   2  -4  -2 1673.83   63.09
  -2   4   2 1690.63   61.09
  -2   4   2 1721.13   59.89
  -2   4   2 1657.43   59.39
  -2   4   2 1679.73   62.19
   1  -4  -2   14.30    4.00
   1  -4  -2    5.10    2.20
  -1   4   2   11.30    3.60
  -1   4   2    8.50    2.10
   0  -4  -2  168.88    9.70
   0  -4  -2  134.89    6.30
   0   4   2  163.08    9.40
   1   4   2  391.96   15.10
   1   4   2  396.66   17.40
   1   4   2  381.46   15.00
   1   4   2  360.26   15.30
  -2  -4  -2  150.28    7.10
  -2  -4  -2  170.18    8.00
  -2  -4  -2  167.98    8.00
   2   4   2  170.58    8.70
   2   4   2  169.68    8.50
   2   4   2  176.28    7.90
   2   4   2  174.78    9.10
  -3  -4  -2   80.69    5.70
  -3  -4  -2   97.59    6.80
  -3  -4  -2   96.99    6.00
  -3  -4  -2   90.49    6.80
  -3  -4  -2   85.09    5.80
   3   4   2   87.49    5.40
   3   4   2   96.69    5.70
   3   4   2   97.29    7.50
   3   4   2   90.89    6.90
   3   4   2   94.59    5.70
   3   4   2   87.99    7.00
   3   4   2   92.99    6.00
  -4  -4  -2    2.90    3.10
  -4  -4  -2   -2.20    2.40
  -4  -4  -2    1.30    2.20
  -4  -4  -2   -0.90    2.80
   4   4   2    2.20    2.40
   4   4   2   -0.90    2.30
   4   4   2    2.30    2.20
   4   4   2   -3.50    2.70
   4   4   2   -0.50    3.10
   4   4   2    1.30    2.70
  -5  -4  -2 1609.14   57.99
  -5  -4  -2 1588.54   58.59
  -5  -4  -2 1549.74   60.79
  -5  -4  -2 1587.34   60.59
  -5  -4  -2 1578.24   59.99
  -5  -4  -2 1630.54   58.39
   5   4   2 1600.74   58.49
   5   4   2 1626.64   60.99
   5   4   2 1549.64   61.59
   5   4   2 1682.43   60.09
  -6  -4  -2  301.47   14.20
  -6  -4  -2  294.77   13.70
  -6  -4  -2  322.87   16.40
  -6  -4  -2  285.07   16.70
  -6  -4  -2  301.67   14.70
   6   4   2  285.17   17.30
   6   4   2  276.97   13.90
   6   4   2  273.47   16.10
   6   4   2  269.67   15.30
  -7  -4  -2  122.09   12.50
  -7  -4  -2  135.19   12.00
  -7  -4  -2  138.89   11.60
  -7  -4  -2  146.09    9.80
  -7  -4  -2  138.09   10.40
   7   4   2  120.19   11.30
   7   4   2  151.98   13.30
   7   4   2  144.59   11.10
   7   4   2  141.49    9.50
  -8  -4  -2  271.07   18.40
  -8  -4  -2  231.68   14.20
  -8  -4  -2  234.38   17.10
  -8  -4  -2  241.48   15.10
   8   4   2  233.58   15.60
   8   4   2  265.77   13.90
   8   4   2  268.77   18.40
  -9  -4  -2  230.58   18.30
  -9  -4  -2  204.08   14.10
  -9  -4  -2  201.28   14.60
   9   4   2  210.68   12.90
   9   4   2  215.68   15.90
   9   4   2  196.48   17.40
 -10  -4  -2   19.20    7.30
 -10  -4  -2   44.10   11.00
 -10  -4  -2    9.30    6.30
  10   4   2   34.40    8.30
  10   4   2   17.10    5.60
 -11  -4  -2  139.69   13.90
 -11  -4  -2  120.79   13.60
 -11  -4  -2   97.79   17.20
  11   4   2  103.59   14.10
  11   4   2  108.09   10.50
  10  -5  -2   16.90    9.60
 -10   5   2   11.40    7.00
 -10   5   2   21.50    9.30
 -10   5   2   29.20   10.30
 -10   5   2    9.90    8.20
   9  -5  -2   88.89   13.10
   9  -5  -2  118.59   14.80
  -9   5   2  112.49   14.70
  -9   5   2  112.59   15.60
  -9   5   2  121.19   12.50
  -9   5   2   83.19   13.60
   8  -5  -2   98.39   13.30
   8  -5  -2  108.59   12.60
  -8   5   2  104.29   12.90
  -8   5   2   88.99   10.20
  -8   5   2  107.29   13.90
  -8   5   2   81.49   11.80
   7  -5  -2  429.66   24.60
   7  -5  -2  456.65   24.20
  -7   5   2  419.96   22.30
  -7   5   2  392.96   22.50
  -7   5   2  464.95   24.70
  -7   5   2  358.46   23.30
  -7   5   2  407.96   20.20
   6  -5  -2  449.06   24.40
   6  -5  -2  441.06   23.40
  -6   5   2  402.56   21.60
  -6   5   2  423.96   22.40
  -6   5   2  460.05   21.70
  -6   5   2  451.15   20.00
  -6   5   2  419.76   23.20
   5  -5  -2  222.88   14.90
   5  -5  -2  234.18   16.20
  -5   5   2  249.48   12.10
  -5   5   2  246.08   13.60
  -5   5   2  243.28   15.30
  -5   5   2  222.78   14.10
  -5   5   2  238.78   15.70
  -5   5   2  261.17   14.20
   4  -5  -2  158.58   11.30
   4  -5  -2  153.08   12.50
  -4   5   2  169.58   10.10
  -4   5   2  183.08   10.10
  -4   5   2  186.48   11.80
  -4   5   2  172.48   10.70
   3  -5  -2  525.55   22.30
   3  -5  -2  535.55   24.60
  -3   5   2  499.45   20.80
  -3   5   2  486.35   20.00
  -3   5   2  481.25   22.00
  -3   5   2  501.75   19.70
   2  -5  -2  524.95   24.40
   2  -5  -2  537.75   21.80
  -2   5   2  533.65   20.20
  -2   5   2  512.85   21.60
  -2   5   2  509.55   19.60
   1  -5  -2  422.36   17.00
   1  -5  -2  426.46   20.30
  -1   5   2  399.36   16.80
  -1   5   2  439.96   22.40
   0  -5  -2   12.60    2.10
   0   5   2   21.30    5.10
   1   5   2   24.00    3.30
   1   5   2   27.40    3.40
   1   5   2   31.70    5.50
   2   5   2   11.00    3.00
   2   5   2    6.30    2.90
   2   5   2    6.60    2.30
   2   5   2    8.70    2.70
  -3  -5  -2   26.30    3.70
  -3  -5  -2   30.90    4.50
   3   5   2   40.40    3.80
   3   5   2   36.70    5.60
   3   5   2   34.60    3.40
   3   5   2   21.20    3.80
   3   5   2   37.10    5.30
   3   5   2   27.70    5.10
  -4  -5  -2   34.80    5.50
  -4  -5  -2   22.30    4.20
  -4  -5  -2   24.50    4.40
  -4  -5  -2   30.50    4.30
   4   5   2   30.10    3.80
   4   5   2   26.40    4.30
   4   5   2   29.30    5.60
   4   5   2   33.40    6.00
   4   5   2   28.40    4.10
   4   5   2   31.00    6.40
  -5  -5  -2    0.00    2.60
  -5  -5  -2   -3.10    3.10
  -5  -5  -2    2.00    3.50
  -5  -5  -2    0.10    3.20
   5   5   2   -1.10    2.50
   5   5   2    1.80    3.90
   5   5   2   -1.50    2.70
   5   5   2   -1.60    3.00
   5   5   2   -0.30    2.40
  -6  -5  -2   30.10    6.30
  -6  -5  -2   27.40    5.30
  -6  -5  -2   28.80    6.70
  -6  -5  -2   25.10    5.20
  -6  -5  -2   37.10    7.30
  -6  -5  -2   37.00    4.60
   6   5   2   27.10    6.60
   6   5   2   30.50    6.80
   6   5   2   25.70    5.20
   6   5   2   28.80    5.70
  -7  -5  -2    2.20    5.40
  -7  -5  -2    1.70    3.60
  -7  -5  -2    0.20    3.00
  -7  -5  -2    2.90    3.90
  -7  -5  -2    3.30    4.40
  -7  -5  -2   -3.70    4.50
   7   5   2   -0.60    4.00
   7   5   2    7.90    4.20
   7   5   2    1.50    4.80
   7   5   2    4.50    3.70
  -8  -5  -2   82.59    8.30
  -8  -5  -2   64.29    8.80
  -8  -5  -2   83.79   12.20
   8   5   2   72.19    8.00
   8   5   2   71.69   12.00
   8   5   2   81.29    9.50
  -9  -5  -2   -8.20    6.30
  -9  -5  -2    8.90    5.00
  -9  -5  -2   -1.30    5.00
   9   5   2   -9.90    5.30
   9   5   2    0.30    4.10
   9   5   2   -3.30    4.40
 -10  -5  -2   16.20    6.30
 -10  -5  -2   10.90    8.60
 -10  -5  -2    2.80    5.60
  10   5   2   -1.60    4.30
  10   5   2   11.80    6.50
 -11  -5  -2   -4.50    5.50
 -11  -5  -2   -1.90    8.00
  11   5   2   -2.40    4.80
  11   5   2   -2.50    6.30
  10  -6  -2   11.50   10.20
 -10   6   2   16.70    9.90
 -10   6   2    4.40    8.00
 -10   6   2   12.70    7.40
   9  -6  -2   27.90    9.40
   9  -6  -2   28.20   10.60
  -9   6   2   29.10    8.10
  -9   6   2   36.40    9.30
  -9   6   2   29.70   10.30
   8  -6  -2   75.29   12.40
   8  -6  -2   69.89   13.00
  -8   6   2   68.89   11.80
  -8   6   2   67.19   11.70
  -8   6   2   72.09    9.60
  -8   6   2   82.39   14.00
   7  -6  -2    3.30    6.80
   7  -6  -2    5.20    5.60
  -7   6   2    4.40    5.40
  -7   6   2    2.50    4.80
  -7   6   2    3.90    5.20
  -7   6   2    0.30    6.50
   6  -6  -2    4.90    6.40
   6  -6  -2    1.80    4.80
  -6   6   2    2.90    4.50
  -6   6   2   15.40    5.80
  -6   6   2    3.60    5.80
  -6   6   2    4.20    3.80
  -6   6   2    5.00    5.10
   5  -6  -2  230.38   17.20
   5  -6  -2  226.98   15.30
  -5   6   2  260.87   17.00
  -5   6   2  265.87   15.10
  -5   6   2  245.18   14.00
  -5   6   2  281.07   18.80
  -5   6   2  261.17   14.10
   4  -6  -2  178.08   14.10
   4  -6  -2  193.78   12.10
  -4   6   2  173.18   11.00
  -4   6   2  184.98   10.00
  -4   6   2  186.88   13.10
  -4   6   2  152.48   11.50
  -4   6   2  158.68    9.90
   3  -6  -2    1.50    3.60
   3  -6  -2   14.20    5.60
  -3   6   2   15.20    3.50
  -3   6   2   12.60    2.90
  -3   6   2    8.50    3.90
   2  -6  -2  250.77   12.20
   2  -6  -2  243.68   15.30
  -2   6   2  229.68   11.90
   1  -6  -2   69.99    8.30
   1  -6  -2   45.80    4.40
  -1   6   2   48.20    4.40
   1   6   2   17.50    3.30
   1   6   2   17.10    3.30
   2   6   2  453.95   19.20
   2   6   2  442.66   18.30
   2   6   2  478.65   19.10
   2   6   2  449.26   18.20
   3   6   2  613.34   25.80
   3   6   2  603.34   23.80
   3   6   2  653.13   26.60
   3   6   2  661.63   26.10
  -4  -6  -2   18.90    4.70
  -4  -6  -2    6.50    2.70
   4   6   2    7.90    2.50
   4   6   2    6.40    3.70
   4   6   2    9.90    4.20
   4   6   2   20.00    4.20
   4   6   2   12.60    2.70
  -5  -6  -2  165.78   10.80
  -5  -6  -2  162.48    8.70
  -5  -6  -2  162.18    9.80
  -5  -6  -2  149.49    8.60
   5   6   2  153.98    9.40
   5   6   2  155.38   12.20
   5   6   2  151.58    8.30
   5   6   2  154.58    9.40
   5   6   2  138.39   10.90
  -6  -6  -2  158.88   10.80
  -6  -6  -2  182.68   12.40
  -6  -6  -2  170.28   11.10
  -6  -6  -2  154.08    9.40
   6   6   2  160.38   10.60
   6   6   2  136.49   13.00
   6   6   2  165.18   12.20
   6   6   2  175.28   10.30
  -7  -6  -2  193.48   11.40
  -7  -6  -2  217.08   13.80
  -7  -6  -2  199.28   13.50
   7   6   2  203.38   12.70
   7   6   2  200.08   16.00
   7   6   2  181.58   11.70
  -8  -6  -2   17.70    6.80
  -8  -6  -2    7.10    4.70
   8   6   2   11.80    5.00
   8   6   2   15.40    7.40
   8   6   2   19.70    5.90
  -9  -6  -2   79.19    9.30
  -9  -6  -2   71.79   11.80
   9   6   2   94.89   11.10
   9   6   2   83.39   13.60
   9   6   2   58.89    8.60
 -10  -6  -2  296.77   20.40
 -10  -6  -2  263.37   16.00
  10   6   2  248.28   21.30
  10   6   2  246.78   15.60
  10   6   2  222.28   17.70
 -11  -6  -2    5.90    8.50
 -11  -6  -2   23.20    7.00
  11   6   2    4.70    7.40
  11   6   2   13.60    6.10
   9  -7  -2   22.20   10.40
   9  -7  -2   15.30    8.90
  -9   7   2   10.00    9.30
  -9   7   2   11.60    7.20
   8  -7  -2    6.20    8.50
   8  -7  -2    2.50    6.60
  -8   7   2   10.00    7.40
  -8   7   2   -4.60    7.80
   7  -7  -2   -5.20    6.60
   7  -7  -2    1.00    5.60
  -7   7   2    0.40    5.00
  -7   7   2   -5.20    6.90
   6  -7  -2   -2.30    7.20
   6  -7  -2   -2.90    4.90
  -6   7   2   13.00    7.10
  -6   7   2    3.90    5.00
  -6   7   2    4.40    4.70
  -6   7   2   -0.50    4.80
   5  -7  -2   22.70    6.50
   5  -7  -2   26.00    8.50
  -5   7   2   31.20    7.50
  -5   7   2   27.20    6.60
  -5   7   2   43.50    9.80
  -5   7   2   26.50    5.60
   4  -7  -2   -5.50    5.10
   4  -7  -2   -0.30    3.80
  -4   7   2   -2.90    3.30
  -4   7   2    2.50    3.10
  -4   7   2    5.10    3.30
  -4   7   2    4.20    4.50
  -4   7   2    2.70    5.40
   3  -7  -2    5.20    5.60
   3  -7  -2    5.60    3.80
  -3   7   2    8.60    3.20
  -3   7   2    9.20    4.30
  -3   7   2    5.60    2.60
   2  -7  -2  225.78   11.70
   2  -7  -2  233.08   15.80
  -2   7   2  213.58   11.60
   1  -7  -2    5.80    2.40
   1  -7  -2   10.20    5.40
  -1   7   2    6.60    2.40
   1   7   2  156.58    7.70
   1   7   2  134.09    7.60
   2   7   2    0.80    2.40
   2   7   2    1.80    2.90
   2   7   2    1.10    2.70
   2   7   2    3.50    2.40
   3   7   2  290.37   12.40
   3   7   2  302.37   15.20
   3   7   2  281.87   14.40
   3   7   2  278.57   14.20
   4   7   2  276.27   12.00
   4   7   2  273.17   15.10
   4   7   2  268.27   15.90
   4   7   2  291.97   11.90
   4   7   2  286.07   13.10
  -5  -7  -2   45.30    5.80
   5   7   2   60.59    6.30
   5   7   2   43.80    7.80
   5   7   2   50.89    8.70
   5   7   2   50.59    5.30
   5   7   2   54.19    5.00
  -6  -7  -2  216.68   11.10
  -6  -7  -2  221.08   14.50
  -6  -7  -2  223.98   12.60
   6   7   2  233.08   16.20
   6   7   2  229.28   12.50
   6   7   2  208.28   12.10
   6   7   2  193.98   14.20
  -7  -7  -2  328.17   17.70
  -7  -7  -2  341.07   16.40
  -7  -7  -2  303.67   15.20
   7   7   2  309.27   17.10
   7   7   2  328.17   16.50
   7   7   2  350.96   21.40
  -8  -7  -2   22.80    6.50
   8   7   2   36.30    9.90
   8   7   2   39.50    7.60
   8   7   2   44.90    8.10
  -9  -7  -2  543.15   27.20
   9   7   2  582.74   32.20
   9   7   2  593.74   28.50
   9   7   2  542.45   25.80
 -10  -7  -2  173.48   15.60
  10   7   2  161.98   13.00
  10   7   2  139.09   17.80
   8  -8  -2   95.69   16.90
   8  -8  -2   74.89   12.60
  -8   8   2  109.09   16.70
  -8   8   2   89.19   13.20
   7  -8  -2   52.29   11.30
   7  -8  -2   68.59   15.10
  -7   8   2   67.79   14.10
  -7   8   2   58.39   10.50
   6  -8  -2   18.30    9.60
   6  -8  -2    2.80    6.10
  -6   8   2    5.90    5.80
  -6   8   2   10.10    5.20
  -6   8   2    5.40    7.30
   5  -8  -2  164.68   13.20
   5  -8  -2  122.09   15.60
  -5   8   2  163.58   12.50
  -5   8   2  166.08   14.90
  -5   8   2  184.18   11.70
   4  -8  -2  228.98   14.30
   4  -8  -2  216.08   18.20
  -4   8   2  209.18   14.10
  -4   8   2  227.28   16.70
  -4   8   2  243.88   13.20
  -4   8   2  218.78   11.90
   3  -8  -2  130.99   13.70
   3  -8  -2  112.39    9.10
  -3   8   2  116.19   12.00
  -3   8   2  126.79    8.20
  -3   8   2  127.29    7.40
  -3   8   2  110.59    9.40
   2  -8  -2  303.87   19.90
   2  -8  -2  333.47   14.90
  -2   8   2  301.17   14.80
   1  -8  -2  654.43   30.30
  -1   8   2  575.74   23.10
   1   8   2  338.77   14.40
   2   8   2   86.99    7.50
   2   8   2   93.19    7.10
   2   8   2   82.89    6.00
   2   8   2   99.69    7.50
   3   8   2  130.19    9.60
   3   8   2  133.99   13.90
   3   8   2  145.49   10.40
   4   8   2  342.77   18.10
   4   8   2  372.56   19.20
   5   8   2  192.88   14.40
   5   8   2  182.78   10.70
   5   8   2  180.18    9.20
   5   8   2  186.38   13.10
   6   8   2   92.59   11.90
   6   8   2   99.99    7.50
   6   8   2   83.79    8.20
   7   8   2  181.98   16.10
   7   8   2  173.08   11.60
   8   8   2   28.00    6.40
   8   8   2   35.00    9.30
  -9  -8  -2   78.19   12.60
   9   8   2   72.99   14.60
   9   8   2   68.69    9.50
  10   8   2   77.49   10.20
  10   8   2   60.99   13.60
   7  -9  -2   84.69   12.70
   7  -9  -2   76.29   16.60
  -7   9   2   80.99   15.20
  -7   9   2   77.89   11.80
   6  -9  -2   46.20   10.30
   6  -9  -2   38.00   12.40
  -6   9   2   46.80    9.20
  -6   9   2   41.30   10.60
   5  -9  -2  133.99   12.60
   5  -9  -2  147.89   17.00
  -5   9   2  140.89   12.20
  -5   9   2  145.59   15.70
  -5   9   2  150.48   11.10
   4  -9  -2  847.92   36.00
   4  -9  -2  862.71   41.90
  -4   9   2  830.92   38.70
  -4   9   2  863.01   34.50
  -4   9   2  839.52   33.20
   3  -9  -2   72.19    7.70
   3  -9  -2   55.39   12.30
  -3   9   2   66.89   10.90
   2  -9  -2    4.80    6.70
  -2   9   2    7.20    5.50
  -2   9   2    9.20    3.80
  -1   9   2  157.78    7.70
   1   9   2   12.40    3.50
   2   9   2   57.19    5.70
   2   9   2   70.29    7.30
   2   9   2   65.99    7.00
   3   9   2   -2.80    4.10
   3   9   2    4.30    4.20
   4   9   2   38.30    7.80
   4   9   2   29.40    6.80
   5   9   2  104.79   13.90
   5   9   2  101.59   11.70
   5   9   2   99.09    8.20
   6   9   2    1.40    4.10
   6   9   2    7.60    6.50
   7   9   2   25.90    8.80
   7   9   2   19.20    5.30
   8   9   2    5.40    5.20
   8   9   2    7.20    8.10
   9   9   2   -1.20    7.30
   9   9   2   16.90    6.30
   6 -10  -2   37.70   12.40
  -6  10   2   48.70    9.60
  -6  10   2   26.00   10.00
   5 -10  -2    4.00    9.20
  -5  10   2    4.00    4.90
  -5  10   2    8.20    5.60
  -5  10   2    7.40    8.50
   4 -10  -2    3.50    8.50
  -4  10   2   -1.60    3.50
  -4  10   2   -5.40    6.40
  -4  10   2   -4.00    4.50
   3 -10  -2   -5.50    7.40
  -3  10   2    1.60    6.50
   2 -10  -2   12.10    8.40
  -2  10   2   23.80    7.10
  -1  10   2   -0.70    5.00
   2  10   2   53.09    7.10
   2  10   2   43.60    7.00
   3  10   2   61.59    8.30
   3  10   2   54.79    8.70
   4  10   2   12.20    5.80
   4  10   2   13.60    5.70
   5  10   2    8.90    6.40
   6  10   2    3.60    6.70
   7  10   2   24.70    8.80
   7  10   2   22.80    6.00
   8  10   2   47.80   11.70
   8  10   2   43.30    9.20
   5 -11  -2   35.90   12.60
  -5  11   2   22.90    6.20
  -5  11   2   38.60    8.70
  -5  11   2   24.60    9.60
   4 -11  -2   47.30   13.00
  -4  11   2   80.69    7.70
  -4  11   2   83.29   14.00
   3 -11  -2  118.99   17.20
  -3  11   2  136.39   14.20
  -2  11   2   21.50    7.30
  -1  11   2   49.10    9.20
   0  11   2   48.20    8.60
   2  11   2   86.99    8.90
   2  11   2   81.89    8.50
   3  11   2  248.48   14.70
   3  11   2  215.78   14.70
   4  11   2  101.79   11.60
   5  11   2  147.39   14.60
   6  11   2   81.99   13.70
   7  11   2  262.67   21.20
  -3  12   2  184.88   17.30
  -2  12   2   75.69   12.10
   2  12   2    9.70    5.20
   2  12   2   11.10    4.80
   3  12   2   17.80    6.10
   4  12   2   59.09   11.00
   5  12   2   49.50   12.00
   2  12  -3   52.29   10.00
   1  12  -3   60.89    9.20
   1  12  -3   55.49    8.10
   5  11  -3   24.20    9.10
   4  11  -3   56.69   11.80
   3  11  -3   -0.60    5.50
   2  11  -3   31.10    7.00
   2  11  -3   32.30    7.40
   1  11  -3   58.89    7.50
   1  11  -3   64.29    8.70
  -3  11  -3   14.20    8.20
   3 -11   3    5.00    8.40
  -4  11  -3    7.10    7.90
   4 -11   3   16.50   10.10
   7  10  -3   -3.10    7.50
   6  10  -3   44.30   10.70
   5  10  -3   16.00    7.70
   4  10  -3   69.99   11.70
   3  10  -3   38.30    8.00
   3  10  -3   44.50    7.80
   2  10  -3   10.40    4.80
   2  10  -3   23.80    6.10
   1  10  -3  203.98   11.80
   1  10  -3  222.08   12.90
  -1  10  -3  104.39   10.80
  -2  10  -3  367.36   19.50
  -3  10  -3  187.18   14.60
   3 -10   3  174.48   17.50
  -4  10  -3  205.38   12.70
  -4  10  -3  241.48   17.30
  -4  10  -3  236.98   12.80
   4 -10   3  210.68   19.60
  -5  10  -3   60.69   12.90
  -5  10  -3   55.89    8.80
  -5  10  -3   37.40    8.50
   5 -10   3   43.60   11.80
  -6  10  -3   50.09   10.10
  -6  10  -3   48.10   11.10
   6 -10   3   63.19   15.30
   8   9  -3   27.90   10.90
   8   9  -3   51.29    9.20
   7   9  -3   22.20    9.00
   7   9  -3   18.30    6.00
   6   9  -3   46.40    7.70
   6   9  -3   63.79   12.60
   5   9  -3  102.29   10.30
   5   9  -3  107.69   13.20
   4   9  -3  283.17   18.30
   3   9  -3  219.48   13.70
   3   9  -3  242.98   15.70
   2   9  -3  287.77   16.00
   2   9  -3  281.67   14.60
   1   9  -3  152.08   10.20
   1   9  -3  150.38    9.20
   1   9  -3  135.39   10.40
   0   9  -3   37.90    4.90
   0   9  -3   30.60    5.80
  -1   9  -3    6.30    4.30
  -2   9  -3    1.40    4.70
   2  -9   3    4.80    6.50
  -3   9  -3  301.77   17.90
   3  -9   3  295.77   20.60
  -4   9  -3  214.58   15.70
  -4   9  -3  205.28   12.00
  -4   9  -3  205.48   11.90
   4  -9   3  178.58   17.40
  -5   9  -3  228.18   14.10
  -5   9  -3  234.98   14.20
  -5   9  -3  222.38   17.90
   5  -9   3  237.38   19.80
  -6   9  -3   31.40    7.30
  -6   9  -3   40.10   10.00
   6  -9   3   33.10   11.30
  -7   9  -3   19.90    9.50
  -7   9  -3   23.20    7.90
   7  -9   3   20.10   10.20
   9   8  -3   52.29   12.90
   8   8  -3  124.89   16.80
   8   8  -3  121.19   11.20
   7   8  -3  117.19    9.90
   7   8  -3   80.39   14.00
   6   8  -3  141.09   10.50
   6   8  -3  156.88   15.40
   5   8  -3   -1.30    3.60
   5   8  -3   -5.40    4.80
   5   8  -3    0.20    3.60
   4   8  -3   -3.00    5.00
   4   8  -3   -0.20    3.50
   4   8  -3    3.40    4.50
   4   8  -3   -1.20    2.90
   3   8  -3  101.49   10.40
   3   8  -3  104.29    7.30
   3   8  -3   96.69    9.00
   2   8  -3   22.00    5.30
   2   8  -3   18.20    3.70
   2   8  -3   25.00    5.00
   1   8  -3   34.30    3.90
   1   8  -3   38.10    4.40
   1   8  -3   23.60    4.30
   1   8  -3   29.10    5.70
   1   8  -3   28.70    5.00
   0   8  -3  327.17   14.50
   0   8  -3  315.97   14.50
  -1   8  -3   17.90    4.10
  -1   8  -3   10.90    4.50
  -2   8  -3  100.79    9.20
  -2   8  -3   84.69    7.90
   2  -8   3  107.29   11.50
  -3   8  -3   74.29    8.40
  -3   8  -3   90.59    6.70
  -3   8  -3   92.69    6.90
  -3   8  -3   88.99    9.80
   3  -8   3   73.49   11.40
  -4   8  -3  197.28   14.40
  -4   8  -3  221.88   11.80
  -4   8  -3  170.88   14.20
  -4   8  -3  204.98   11.70
   4  -8   3  201.68   16.60
  -5   8  -3   79.09    9.30
  -5   8  -3   94.19   12.60
  -5   8  -3   94.09    9.50
   5  -8   3  111.19   13.80
  -6   8  -3   12.60    7.80
  -6   8  -3    6.40    5.40
  -6   8  -3   10.90    5.80
   6  -8   3   -5.20    7.00
  -7   8  -3   33.40    8.20
  -7   8  -3   24.10    9.40
   7  -8   3   24.60    8.10
   7  -8   3   18.30    9.80
  -8   8  -3   26.30   10.60
  -8   8  -3   65.89   12.60
   8  -8   3   52.59   12.10
   8  -8   3   34.80   12.50
   9   7  -3  108.39   16.50
   9   7  -3   85.89   10.20
  -9  -7   3  108.29   11.10
   8   7  -3   10.30    5.30
   8   7  -3   18.00    6.50
   8   7  -3   10.00    8.10
  -8  -7   3   10.80    5.00
   7   7  -3  472.15   24.20
   7   7  -3  495.75   22.30
   7   7  -3  485.75   27.90
  -7  -7   3  486.05   20.30
   6   7  -3   19.00    5.50
   6   7  -3    5.00    6.50
   6   7  -3   17.50    4.80
   5   7  -3   65.89    9.00
   5   7  -3   56.09    6.80
   5   7  -3   53.59    7.20
   5   7  -3   64.39   10.50
   4   7  -3   40.50    8.70
   4   7  -3   34.00    5.30
   4   7  -3   40.10    6.10
   4   7  -3   28.30    6.20
   3   7  -3  133.79   11.00
   3   7  -3  140.99   10.10
   3   7  -3  137.69    8.90
   2   7  -3   12.70    3.80
   2   7  -3   11.60    4.30
   2   7  -3   17.90    3.90
   2   7  -3   16.70    3.60
   1   7  -3   50.79    8.30
   1   7  -3   49.00    5.10
   1   7  -3   43.20    5.50
   0   7  -3  124.29    7.40
   0   7  -3  129.49    6.80
   0   7  -3  127.19    7.60
   0   7  -3  120.99    7.60
  -1   7  -3    3.10    3.20
  -1   7  -3    3.20    2.90
   1  -7   3    7.10    4.80
  -2   7  -3  103.89    8.20
  -2   7  -3  107.29    9.00
   2  -7   3  110.49   10.60
  -3   7  -3   99.99    8.80
  -3   7  -3   81.29    6.40
  -3   7  -3   78.99    6.30
  -3   7  -3   83.89    9.10
   3  -7   3   85.79   10.50
  -4   7  -3   76.99    9.50
  -4   7  -3   85.69    7.70
  -4   7  -3   98.29    7.90
  -4   7  -3   80.69    9.80
   4  -7   3  104.89   12.00
  -5   7  -3   97.59    9.20
  -5   7  -3   88.69    9.10
  -5   7  -3  100.49   11.50
   5  -7   3  108.49   12.80
   5  -7   3   94.19   10.10
  -6   7  -3   21.00    6.20
  -6   7  -3   30.40    8.30
  -6   7  -3   14.50    6.00
   6  -7   3   23.00    8.90
   6  -7   3   15.20    6.50
  -7   7  -3   50.29   10.50
  -7   7  -3   74.79   13.20
   7  -7   3   75.59   11.80
   7  -7   3   78.09   13.30
  -8   7  -3   69.39   13.90
  -8   7  -3   64.79   12.00
   8  -7   3   29.60   10.70
   8  -7   3   70.49   12.20
  -9   7  -3   17.90   10.10
  -9   7  -3   30.10    9.70
   9  -7   3   22.40    9.60
   9  -7   3   26.90   11.10
  10   6  -3   -1.10    4.60
  10   6  -3   17.00    7.80
 -10  -6   3   -3.40    6.40
   9   6  -3   -1.70    5.20
   9   6  -3   -0.50    7.00
   9   6  -3   -3.20    4.40
  -9  -6   3   11.20    6.40
   8   6  -3   78.29    8.90
   8   6  -3   88.69   14.40
   8   6  -3   84.39   10.60
  -8  -6   3   80.19   10.20
   7   6  -3   13.80    4.80
   7   6  -3    6.70    6.60
   7   6  -3   14.00    5.40
  -7  -6   3   16.70    5.30
   6   6  -3    1.20    4.10
   6   6  -3    4.40    3.70
   6   6  -3    0.90    5.60
  -6  -6   3    4.20    3.50
   5   6  -3   18.60    4.30
   5   6  -3   11.10    6.10
   5   6  -3   17.90    5.70
   5   6  -3   17.10    4.90
  -5  -6   3   19.80    4.90
   4   6  -3  231.08   12.60
   4   6  -3  225.58   11.20
   4   6  -3  222.88   14.90
   4   6  -3  211.78   13.30
   3   6  -3  499.35   22.30
   3   6  -3  520.45   23.50
   3   6  -3  501.05   21.50
   2   6  -3  743.13   29.70
   2   6  -3  728.13   28.20
   2   6  -3  717.53   28.20
   2   6  -3  688.23   29.40
   2   6  -3  717.13   28.70
   1   6  -3  708.13   29.00
   1   6  -3  748.63   27.40
   1   6  -3  721.33   28.10
   1   6  -3  686.13   26.20
   1   6  -3  687.23   25.80
   0   6  -3  125.39    6.60
   0   6  -3  116.69    6.90
   0   6  -3  123.49    8.60
   0   6  -3  125.39    7.10
   0   6  -3  124.59    7.50
  -1   6  -3 1280.67   50.19
  -1   6  -3 1316.57   49.70
  -1   6  -3 1374.76   49.50
   1  -6   3 1350.46   51.59
  -2   6  -3  378.96   17.70
  -2   6  -3  403.46   18.00
   2  -6   3  367.96   19.30
  -3   6  -3  129.39    7.60
  -3   6  -3  133.89    9.90
  -3   6  -3  116.69    7.30
  -3   6  -3  130.09    9.90
   3  -6   3  105.29   10.50
  -4   6  -3  600.54   27.60
  -4   6  -3  658.23   25.60
  -4   6  -3  578.94   27.70
  -4   6  -3  631.04   25.50
   4  -6   3  638.74   27.80
   4  -6   3  589.84   28.80
  -5   6  -3  309.47   18.00
  -5   6  -3  323.67   16.30
  -5   6  -3  283.77   15.70
   5  -6   3  295.87   18.90
   5  -6   3  310.67   17.50
  -6   6  -3   55.39    8.40
  -6   6  -3   48.80   10.30
  -6   6  -3   65.79    9.10
  -6   6  -3   63.69    9.00
   6  -6   3   65.49   10.80
   6  -6   3   49.70    8.60
  -7   6  -3  337.07   17.20
  -7   6  -3  335.87   19.90
  -7   6  -3  361.16   19.90
  -7   6  -3  364.26   22.00
   7  -6   3  310.97   20.40
   7  -6   3  349.96   22.10
  -8   6  -3   40.10    8.40
  -8   6  -3   38.40   10.00
  -8   6  -3   30.90    8.40
   8  -6   3   38.80   10.50
   8  -6   3   26.70    8.70
  -9   6  -3  112.79   15.20
  -9   6  -3   92.99   12.90
  -9   6  -3   83.29   15.60
   9  -6   3  131.19   16.00
   9  -6   3  103.19   14.00
 -10   6  -3   94.69   15.90
 -10   6  -3   73.29   16.70
  10  -6   3   92.79   15.80
  10   5  -3  206.88   17.50
  10   5  -3  178.98   13.30
 -10  -5   3  185.58   14.20
 -10  -5   3  213.08   18.50
   9   5  -3   14.60    5.40
   9   5  -3   20.90    8.90
   9   5  -3   14.10    6.50
  -9  -5   3   21.90    8.20
  -9  -5   3   14.70    5.40
   8   5  -3   34.90    6.90
   8   5  -3   38.40   10.00
   8   5  -3   34.80    8.50
  -8  -5   3   33.50    7.10
  -8  -5   3   51.19   10.30
   7   5  -3  275.87   14.90
   7   5  -3  308.17   17.70
   7   5  -3  301.47   20.20
  -7  -5   3  289.17   13.10
  -7  -5   3  271.37   16.80
   6   5  -3   24.20    6.10
   6   5  -3   17.50    6.30
   6   5  -3   22.10    5.70
   6   5  -3   17.00    4.50
  -6  -5   3   22.00    5.70
  -6  -5   3   22.50    3.70
  -6  -5   3   31.10    6.40
  -6  -5   3   22.20    5.50
   5   5  -3  242.88   16.40
   5   5  -3  238.48   14.70
   5   5  -3  255.77   12.70
   5   5  -3  284.77   15.00
  -5  -5   3  250.87   13.20
  -5  -5   3  259.27   14.60
   4   5  -3  378.66   19.10
   4   5  -3  398.96   20.80
   4   5  -3  421.86   17.10
   4   5  -3  414.16   18.80
  -4  -5   3  401.66   18.60
  -4  -5   3  399.76   16.50
   3   5  -3    8.00    4.10
   3   5  -3   19.90    4.70
   3   5  -3   14.00    2.80
   3   5  -3   13.30    3.60
   3   5  -3    7.70    3.60
  -3  -5   3   10.40    3.30
   2   5  -3  861.41   34.00
   2   5  -3  885.31   33.80
   2   5  -3  872.21   34.60
   2   5  -3  875.81   33.40
   2   5  -3  868.31   33.40
   1   5  -3  693.53   26.20
   1   5  -3  680.83   25.40
   1   5  -3  707.43   27.40
   1   5  -3  655.23   26.80
   0   5  -3  429.16   17.20
   0   5  -3  428.86   17.00
   0   5  -3  446.46   17.50
   0   5  -3  444.36   18.70
  -1   5  -3  148.09    8.70
  -1   5  -3  172.78    9.30
  -1   5  -3  158.78    8.80
   1  -5   3  152.28    9.80
  -2   5  -3  375.96   14.80
  -2   5  -3  344.07   16.50
  -2   5  -3  351.76   14.40
  -2   5  -3  359.96   16.60
   2  -5   3  391.56   18.00
  -3   5  -3  242.08   13.60
  -3   5  -3  247.78   13.60
  -3   5  -3  246.58   11.50
  -3   5  -3  250.37   11.70
   3  -5   3  252.07   14.30
  -4   5  -3   17.90    4.20
  -4   5  -3   29.90    6.40
  -4   5  -3   14.70    5.00
  -4   5  -3   13.80    3.70
   4  -5   3   14.20    4.30
   4  -5   3   17.20    5.60
  -5   5  -3  251.07   16.30
  -5   5  -3  306.57   16.60
  -5   5  -3  265.37   13.90
  -5   5  -3  263.67   14.50
  -5   5  -3  251.67   14.40
   5  -5   3  273.47   15.90
   5  -5   3  270.07   16.40
  -6   5  -3    3.90    3.50
  -6   5  -3   14.30    5.20
  -6   5  -3    1.70    4.40
  -6   5  -3    2.60    5.10
  -6   5  -3    7.10    4.80
   6  -5   3    4.50    4.70
   6  -5   3    0.20    5.00
  -7   5  -3  420.56   22.70
  -7   5  -3  427.56   23.80
  -7   5  -3  436.56   22.70
  -7   5  -3  433.66   20.00
  -7   5  -3  422.36   22.40
   7  -5   3  420.76   23.80
   7  -5   3  392.76   23.10
  -8   5  -3  107.99   13.80
  -8   5  -3   95.19   10.50
  -8   5  -3  118.39   13.30
  -8   5  -3  102.09   13.10
   8  -5   3   97.19   12.80
   8  -5   3  126.49   13.10
  -9   5  -3   57.39   12.60
  -9   5  -3   26.90   10.00
  -9   5  -3   39.80    8.30
  -9   5  -3   49.20   10.80
   9  -5   3   27.20    9.60
   9  -5   3   35.80    9.60
 -10   5  -3   39.90   11.20
 -10   5  -3   34.70    8.70
 -10   5  -3   37.70   10.20
 -10   5  -3   36.40   11.20
  10  -5   3   36.00   10.90
  10   4  -3  111.39   13.10
  10   4  -3  105.29   10.10
 -10  -4   3   91.99   14.50
 -10  -4   3  101.79   11.90
   9   4  -3  348.27   18.50
   9   4  -3  369.86   22.50
   9   4  -3  384.96   25.00
  -9  -4   3  401.06   23.70
  -9  -4   3  364.96   18.50
  -9  -4   3  349.37   19.90
   8   4  -3   75.79   12.70
   8   4  -3   89.39    8.50
   8   4  -3   74.19   10.40
  -8  -4   3   81.09    9.20
  -8  -4   3   62.79   11.10
  -8  -4   3   79.29    8.10
   7   4  -3  142.19   12.10
   7   4  -3  152.28   10.00
   7   4  -3  144.89   14.40
  -7  -4   3  168.58   13.60
  -7  -4   3  127.29   10.30
  -7  -4   3  141.79    9.30
  -7  -4   3  139.79   12.60
   6   4  -3  251.87   15.00
   6   4  -3  217.58   14.60
   6   4  -3  218.98   16.10
   6   4  -3  234.68   12.30
  -6  -4   3  226.48   11.20
  -6  -4   3  222.58   12.50
  -6  -4   3  240.58   14.90
  -6  -4   3  229.28   14.50
  -6  -4   3  235.68   11.60
  -6  -4   3  242.88   15.00
   5   4  -3   24.60    5.80
   5   4  -3   20.20    6.10
   5   4  -3   21.70    5.10
   5   4  -3   20.20    4.70
  -5  -4   3   19.40    3.50
  -5  -4   3   13.60    4.70
  -5  -4   3   17.60    5.00
  -5  -4   3   20.20    5.10
  -5  -4   3   17.30    3.60
   4   4  -3   -0.20    4.00
   4   4  -3    0.40    2.90
   4   4  -3    0.20    2.90
   4   4  -3    7.70    2.70
  -4  -4   3    7.10    3.20
  -4  -4   3    1.90    3.10
   3   4  -3  256.97   13.10
   3   4  -3  221.28   13.10
   3   4  -3  280.47   11.50
   3   4  -3  267.57   13.00
   3   4  -3  242.28   14.10
  -3  -4   3  265.27   11.40
  -3  -4   3  257.77   12.70
   2   4  -3    0.90    2.30
   2   4  -3    0.90    2.50
   2   4  -3    0.10    2.30
   2   4  -3    4.60    3.10
   2   4  -3    1.80    2.50
  -2  -4   3   -0.60    2.00
   1   4  -3  228.68   10.50
   1   4  -3  222.08   10.80
   1   4  -3  215.98    9.70
   1   4  -3  213.18   10.10
   0   4  -3   22.70    3.40
   0   4  -3   15.10    2.90
   0   4  -3   29.80    3.90
   0   4  -3   15.50    2.90
   0  -4   3   13.80    2.80
  -1   4  -3  141.89    6.80
  -1   4  -3  141.79    6.40
  -1   4  -3  130.39    7.70
  -1   4  -3  137.99    7.90
  -1   4  -3  133.09    7.60
   1  -4   3  134.19    8.10
   1  -4   3  138.59    8.40
  -2   4  -3  402.76   17.50
  -2   4  -3  382.66   15.40
  -2   4  -3  390.86   15.70
  -2   4  -3  388.76   15.40
  -2   4  -3  366.46   17.00
   2  -4   3  403.96   17.80
  -3   4  -3  801.72   29.80
  -3   4  -3  681.33   30.80
  -3   4  -3  792.32   31.70
  -3   4  -3  788.52   29.70
   3  -4   3  794.32   31.50
   3  -4   3  780.92   31.60
  -4   4  -3    5.60    4.30
  -4   4  -3   14.00    4.60
  -4   4  -3   -1.30    3.10
  -4   4  -3    6.70    3.30
   4  -4   3    8.00    4.10
   4  -4   3    9.90    3.90
  -5   4  -3  160.58   10.70
  -5   4  -3  166.28   10.30
  -5   4  -3  154.08   11.70
  -5   4  -3  164.98    8.80
  -5   4  -3  168.88   11.00
  -5   4  -3  141.09   11.50
   5  -4   3  158.18   11.40
   5  -4   3  176.08   11.90
  -6   4  -3  101.79   10.10
  -6   4  -3  105.09    8.20
  -6   4  -3   99.19   10.70
  -6   4  -3  116.79   10.50
  -6   4  -3  133.99   10.70
   6  -4   3  109.59   10.50
   6  -4   3   95.49   10.00
  -7   4  -3   10.30    6.00
  -7   4  -3   12.90    5.00
  -7   4  -3    9.20    6.00
  -7   4  -3    6.50    5.90
  -7   4  -3   10.10    5.70
   7  -4   3    5.90    5.60
   7  -4   3    9.50    5.60
  -8   4  -3   16.00    5.90
  -8   4  -3   26.90    7.80
  -8   4  -3   36.80    9.00
  -8   4  -3   29.30    7.70
   8  -4   3   15.80    6.90
   8  -4   3   19.20    7.50
  -9   4  -3   29.40    8.60
  -9   4  -3   27.30    8.70
  -9   4  -3   29.60    9.30
  -9   4  -3   31.00    7.80
   9  -4   3   28.00    8.80
   9  -4   3   34.60    9.10
 -10   4  -3   70.49   14.70
 -10   4  -3   60.19   14.70
 -10   4  -3   67.39   13.00
 -10   4  -3   47.50   10.90
  10  -4   3   63.59   13.10
  10  -4   3   64.99   12.90
 -11   4  -3   19.70    9.80
 -11   4  -3   31.30   11.40
 -11   4  -3   19.90    8.30
 -11   4  -3   29.30   10.90
  11  -4   3   30.40   10.40
  11   3  -3    8.60    5.30
 -11  -3   3   10.10    6.90
 -11  -3   3   18.00    9.30
  10   3  -3   14.50    5.30
  10   3  -3   13.20    7.20
 -10  -3   3    8.00    5.80
 -10  -3   3    3.90    5.70
 -10  -3   3    4.90    7.20
   9   3  -3  143.19   10.50
   9   3  -3  114.19   12.70
   9   3  -3  122.39   15.10
  -9  -3   3  143.79   15.30
  -9  -3   3  139.69   11.70
  -9  -3   3  123.09   12.10
   8   3  -3   13.50    7.10
   8   3  -3   15.00    4.50
   8   3  -3   29.80    7.40
  -8  -3   3   21.10    7.20
  -8  -3   3   20.10    6.00
  -8  -3   3   26.30    5.60
   7   3  -3    2.00    4.00
   7   3  -3   -1.70    5.00
   7   3  -3    3.10    4.80
   7   3  -3    2.70    3.30
  -7  -3   3    1.20    3.60
  -7  -3   3    2.20    3.50
  -7  -3   3    0.60    5.20
  -7  -3   3    1.60    4.40
   6   3  -3   33.80    5.20
   6   3  -3   41.70    7.50
   6   3  -3   48.80    9.10
   6   3  -3   41.80    7.00
  -6  -3   3   32.80    6.80
  -6  -3   3   52.29    7.90
  -6  -3   3   38.60    5.70
  -6  -3   3   39.20    7.90
   5   3  -3    1.70    3.50
   5   3  -3    1.60    3.40
   5   3  -3    1.30    3.90
   5   3  -3   -1.60    2.40
  -5  -3   3    3.60    2.60
  -5  -3   3    0.60    2.20
  -5  -3   3    0.00    3.60
  -5  -3   3    0.50    1.50
  -5  -3   3   -4.70    2.90
  -5  -3   3    0.60    2.70
   4   3  -3   51.39    6.30
   4   3  -3   53.29    5.00
   4   3  -3   50.79    6.90
   4   3  -3   49.20    6.10
   4   3  -3   53.39    7.50
  -4  -3   3   51.59    4.40
  -4  -3   3   45.20    6.00
  -4  -3   3   54.19    4.50
  -4  -3   3   51.99    6.50
  -4  -3   3   49.70    6.30
  -4  -3   3   50.39    5.20
   3   3  -3    0.80    2.50
   3   3  -3    4.60    3.50
   3   3  -3    4.60    2.20
   3   3  -3    1.30    2.90
   3   3  -3    2.30    2.70
   3   3  -3    3.50    2.70
  -3  -3   3    3.20    2.70
  -3  -3   3    1.90    3.00
  -3  -3   3   -0.30    2.50
  -3  -3   3    2.10    1.70
  -3  -3   3    1.10    1.50
   2   3  -3    0.60    2.90
   2   3  -3    1.30    2.20
   2   3  -3    1.70    1.70
   2   3  -3    1.90    2.00
   2   3  -3    2.80    2.50
   2   3  -3    4.10    2.80
  -2  -3   3    0.10    2.00
  -2  -3   3    5.50    2.00
  -2  -3   3    3.90    2.50
   1   3  -3   29.00    3.50
   1   3  -3   28.80    3.30
   1   3  -3   30.70    3.70
   1   3  -3   23.10    4.10
  -1  -3   3   31.20    2.30
  -1  -3   3   24.30    3.30
  -1  -3   3   26.20    3.20
   0   3  -3    5.00    1.70
   0   3  -3    2.60    1.80
   0   3  -3    4.60    2.00
   0   3  -3    1.90    1.70
   0  -3   3    3.40    1.80
   0  -3   3    5.30    2.00
  -1   3  -3   63.09    3.80
  -1   3  -3   57.69    4.20
  -1   3  -3   60.29    4.90
  -1   3  -3   69.79    4.70
  -1   3  -3   53.89    4.10
   1  -3   3   51.19    4.70
   1  -3   3   50.69    4.70
  -2   3  -3 2268.77   77.19
  -2   3  -3 2037.90   78.49
  -2   3  -3 2248.88   78.39
  -2   3  -3 2190.58   77.29
   2  -3   3 2141.19   78.69
   2  -3   3 2171.98   78.29
  -3   3  -3  192.98    9.70
  -3   3  -3  198.58    9.90
  -3   3  -3  180.68   10.80
  -3   3  -3  187.88   10.70
   3  -3   3  181.18   10.20
   3  -3   3  191.18   10.80
   3  -3   3  176.68    7.90
   3  -3   3  173.78    7.90
  -4   3  -3  554.14   23.20
  -4   3  -3  538.65   23.10
  -4   3  -3  532.95   24.30
  -4   3  -3  560.04   24.00
   4  -3   3  556.94   23.60
   4  -3   3  547.65   24.20
   4  -3   3  551.04   21.50
  -5   3  -3  220.48   14.00
  -5   3  -3  223.88   13.20
  -5   3  -3  239.48   13.10
  -5   3  -3  221.08   13.60
  -5   3  -3  236.98   11.30
  -5   3  -3  242.78   13.60
   5  -3   3  220.98   11.40
   5  -3   3  223.68   13.70
  -6   3  -3   35.80    7.30
  -6   3  -3   37.30    7.50
  -6   3  -3   43.10    6.10
  -6   3  -3   17.40    5.60
  -6   3  -3   32.70    7.60
   6  -3   3   32.00    5.40
   6  -3   3   31.20    6.80
  -7   3  -3  346.77   20.30
  -7   3  -3  407.86   21.10
  -7   3  -3  392.06   21.10
  -7   3  -3  358.86   20.60
  -7   3  -3  361.36   18.20
   7  -3   3  362.56   18.00
   7  -3   3  353.96   20.80
  -8   3  -3  250.47   17.70
  -8   3  -3  221.18   17.40
  -8   3  -3  264.87   15.60
  -8   3  -3  275.07   18.30
   8  -3   3  263.07   18.00
  -9   3  -3   -1.70    6.20
  -9   3  -3   -0.80    6.30
  -9   3  -3    2.70    5.40
  -9   3  -3    1.20    6.70
   9  -3   3    4.30    6.30
 -10   3  -3   20.50    7.70
 -10   3  -3   29.10    9.90
 -10   3  -3   28.90    9.50
 -10   3  -3   12.60    8.70
  10  -3   3   26.80    8.70
  10  -3   3   27.30    8.70
 -11   3  -3   89.99   16.20
 -11   3  -3   91.49   16.30
 -11   3  -3  158.88   18.30
 -11   3  -3   92.99   13.40
  11  -3   3  105.89   15.00
  11   2  -3    3.80    4.70
 -11  -2   3   -4.70    6.80
 -11  -2   3    0.90    6.50
 -11  -2   3   -9.10    5.10
  10   2  -3   58.19    8.00
  10   2  -3   65.99   12.00
 -10  -2   3   70.19   14.10
 -10  -2   3   59.09   10.60
 -10  -2   3   67.69   11.40
   9   2  -3   41.10    6.90
   9   2  -3   43.50    9.40
  -9  -2   3   42.40    9.80
  -9  -2   3   77.09   10.10
  -9  -2   3   41.30    9.20
   8   2  -3   59.79   10.70
   8   2  -3   50.79    6.50
   8   2  -3   44.20    8.80
  -8  -2   3   46.20    8.20
  -8  -2   3   38.20    8.80
  -8  -2   3   41.20    8.40
  -8  -2   3   51.99   10.30
   7   2  -3   44.70    8.10
   7   2  -3   38.40    5.70
   7   2  -3   28.40    7.40
   7   2  -3   38.20    7.90
  -7  -2   3   37.90    7.40
  -7  -2   3   27.80    7.40
  -7  -2   3   48.60    9.00
  -7  -2   3   28.60    6.70
   6   2  -3   45.30    7.20
   6   2  -3   31.30    5.00
   6   2  -3   34.00    6.90
   6   2  -3   36.70    8.20
  -6  -2   3   26.20    6.20
  -6  -2   3   40.20    6.60
  -6  -2   3   26.90    6.00
  -6  -2   3   37.60    8.00
  -6  -2   3   34.60    5.80
   5   2  -3  955.60   39.70
   5   2  -3  916.21   35.50
   5   2  -3  935.41   38.70
   5   2  -3  918.01   38.20
   5   2  -3  971.80   41.70
  -5  -2   3  886.21   38.40
  -5  -2   3  942.81   38.40
  -5  -2   3  894.61   36.70
  -5  -2   3  952.50   38.50
  -5  -2   3 1015.70   40.00
  -5  -2   3  956.20   36.30
   4   2  -3 1405.16   54.49
   4   2  -3 1463.65   55.89
   4   2  -3 1483.45   54.99
   4   2  -3 1408.96   52.19
   4   2  -3 1456.65   55.39
  -4  -2   3 1463.95   54.79
  -4  -2   3 1476.45   52.69
  -4  -2   3 1425.56   54.69
  -4  -2   3 1422.96   52.19
  -4  -2   3 1517.95   55.09
  -4  -2   3 1426.46   53.29
  -4  -2   3 1344.17   55.19
   3   2  -3  796.52   29.50
   3   2  -3  780.22   31.80
   3   2  -3  809.92   31.60
   3   2  -3  802.72   30.50
   3   2  -3  822.92   31.50
   3   2  -3  746.33   32.10
  -3  -2   3  812.02   29.40
  -3  -2   3  836.42   30.30
  -3  -2   3  795.12   31.40
  -3  -2   3  757.42   31.90
  -3  -2   3  753.32   31.10
   2   2  -3  295.77   14.60
   2   2  -3  322.07   14.10
   2   2  -3  305.47   12.40
   2   2  -3  303.57   13.80
   2   2  -3  307.37   13.20
   2   2  -3  351.26   14.50
  -2  -2   3  309.27   13.80
  -2  -2   3  310.57   13.50
  -2  -2   3  316.97   12.20
  -2  -2   3  312.77   12.70
  -2  -2   3  300.27   14.20
   1   2  -3 1520.45   52.79
   1   2  -3 1501.15   53.49
   1   2  -3 1436.66   51.99
   1   2  -3 1439.76   52.79
  -1  -2   3 1493.75   51.99
  -1  -2   3 1488.75   52.69
  -1  -2   3 1397.16   52.89
  -1  -2   3 1443.86   51.39
   0   2  -3  998.40   36.20
   0   2  -3  995.00   35.80
   0   2  -3 1001.10   35.40
   0   2  -3 1006.50   36.70
   0  -2   3  967.30   35.70
   0  -2   3 1024.50   36.10
   0  -2   3 1003.10   35.80
  -1   2  -3  186.38    8.60
  -1   2  -3  180.48    8.10
  -1   2  -3  177.88    8.50
   1  -2   3  182.88    7.60
   1  -2   3  180.68    8.20
   1  -2   3  182.98    7.70
   1  -2   3  193.28    8.60
  -2   2  -3 1674.73   61.49
  -2   2  -3 1737.23   60.59
  -2   2  -3 1698.83   60.59
  -2   2  -3 1647.74   60.99
   2  -2   3 1650.03   61.09
   2  -2   3 1694.83   59.79
   2  -2   3 1716.83   59.89
  -3   2  -3  235.68   11.50
  -3   2  -3  259.97   12.60
  -3   2  -3  222.68   12.00
  -3   2  -3  248.88   10.10
  -3   2  -3  245.98   11.70
   3  -2   3  234.18   12.20
   3  -2   3  230.58   10.70
   3  -2   3  242.88   10.90
  -4   2  -3   13.20    3.90
  -4   2  -3   16.90    3.90
  -4   2  -3   20.60    4.30
  -4   2  -3   13.30    4.30
  -4   2  -3    9.50    3.90
  -4   2  -3   16.90    3.20
  -4   2  -3   11.80    2.40
   4  -2   3   18.40    3.50
   4  -2   3   12.30    4.00
  -5   2  -3  768.42   32.20
  -5   2  -3  799.22   32.10
  -5   2  -3  837.32   32.50
  -5   2  -3  751.82   32.80
  -5   2  -3  743.53   32.10
  -5   2  -3  757.62   30.20
   5  -2   3  751.12   30.90
   5  -2   3  800.62   33.10
  -6   2  -3   -4.40    3.40
  -6   2  -3    2.70    5.00
  -6   2  -3    4.70    4.30
  -6   2  -3   -1.40    3.30
  -6   2  -3    1.50    4.00
  -6   2  -3   -3.00    4.00
   6  -2   3   -1.20    2.70
   6  -2   3    4.90    4.20
  -7   2  -3  418.16   21.10
  -7   2  -3  375.86   18.60
  -7   2  -3  402.46   21.10
  -7   2  -3  378.36   20.70
  -7   2  -3  336.27   20.40
   7  -2   3  350.06   18.90
   7  -2   3  386.06   21.20
  -8   2  -3  195.68   13.30
  -8   2  -3  160.58   15.30
  -8   2  -3  199.78   15.00
  -8   2  -3  152.58   14.60
   8  -2   3  203.08   15.30
  -9   2  -3  221.18   18.40
  -9   2  -3  240.98   18.00
  -9   2  -3  226.68   18.50
  -9   2  -3  222.28   15.60
   9  -2   3  263.47   18.60
 -10   2  -3    0.60    6.80
 -10   2  -3   -6.80    6.10
 -10   2  -3   -9.10    6.60
 -10   2  -3    4.90    6.00
  10  -2   3   -2.80    5.70
 -11   2  -3   -8.20    6.90
 -11   2  -3   -2.80    6.20
 -11   2  -3   -7.70    7.90
 -11   2  -3    2.10    8.50
  11   1  -3   58.09    8.60
 -11  -1   3   31.10    9.00
 -11  -1   3   34.00    9.20
 -11  -1   3   46.50   12.20
  10   1  -3  148.09   15.00
  10   1  -3  125.19   10.20
 -10  -1   3  120.49   13.20
 -10  -1   3  121.89   16.80
 -10  -1   3  147.39   14.10
   9   1  -3   50.19    9.90
   9   1  -3   63.79    7.40
  -9  -1   3   76.99   13.30
  -9  -1   3   64.09   10.20
  -9  -1   3   86.59   13.00
  -9  -1   3   41.90    9.40
   8   1  -3    8.60    5.20
   8   1  -3    6.80    6.00
   8   1  -3   12.30    4.00
  -8  -1   3    9.60    6.50
  -8  -1   3   11.80    6.00
  -8  -1   3    8.90    5.20
  -8  -1   3   15.40    5.60
   7   1  -3   15.40    5.70
   7   1  -3    7.20    5.80
   7   1  -3   26.50    4.80
  -7  -1   3   20.80    5.50
  -7  -1   3   15.90    5.70
  -7  -1   3   16.70    6.40
  -7  -1   3   14.70    6.10
  -7  -1   3   13.70    5.40
   6   1  -3   15.10    5.50
   6   1  -3   11.50    4.80
   6   1  -3   21.00    4.10
   6   1  -3   16.00    5.00
  -6  -1   3   17.00    6.10
  -6  -1   3   13.20    4.50
  -6  -1   3   13.40    5.60
  -6  -1   3   14.70    4.50
  -6  -1   3   21.40    5.70
  -6  -1   3   33.70    6.80
   5   1  -3 1754.92   68.19
   5   1  -3 1729.63   64.79
   5   1  -3 1828.42   68.99
   5   1  -3 1771.12   67.49
   5   1  -3 1930.81   68.89
  -5  -1   3 1843.22   68.39
  -5  -1   3 1755.52   67.89
  -5  -1   3 1872.81   68.79
  -5  -1   3 1806.12   69.09
  -5  -1   3 1734.33   66.49
  -5  -1   3 1746.43   66.19
   4   1  -3 1583.64   59.19
   4   1  -3 1519.45   59.59
   4   1  -3 1552.74   58.59
   4   1  -3 1515.65   56.29
   4   1  -3 1559.54   59.29
   4   1  -3 1658.23   59.09
  -4  -1   3 1576.34   59.09
  -4  -1   3 1626.74   57.89
  -4  -1   3 1542.55   59.69
  -4  -1   3 1538.35   58.59
  -4  -1   3 1507.15   56.29
  -4  -1   3 1571.44   59.29
   3   1  -3 3207.28  112.59
   3   1  -3 3174.38  114.89
   3   1  -3 3083.29  115.29
   3   1  -3 3255.87  113.69
   3   1  -3 3257.07  115.09
   3   1  -3 3173.48  114.39
  -3  -1   3 3137.19  113.49
  -3  -1   3 3328.57  114.89
  -3  -1   3 3236.08  112.59
  -3  -1   3 3195.18  114.49
  -3  -1   3 3277.07  115.39
  -3  -1   3 3177.68  114.79
   2   1  -3 9226.88  323.17
   2   1  -3 9173.38  322.67
   2   1  -3 9549.34  322.67
   2   1  -3 9104.99  322.27
   2   1  -3 9154.98  320.87
   2   1  -3 9146.68  321.77
  -2  -1   3 9435.26  322.37
  -2  -1   3 9365.06  320.87
  -2  -1   3 8855.61  322.87
  -2  -1   3 9443.16  322.47
  -2  -1   3 9609.84  322.67
  -2  -1   3 9161.08  321.57
   1   1  -3 1286.67   47.90
   1   1  -3 1360.26   47.40
   1   1  -3 1343.57   46.70
   1   1  -3 1285.87   47.10
   1   1  -3 1276.87   46.10
  -1  -1   3 1286.97   47.10
  -1  -1   3 1288.97   46.30
  -1  -1   3 1288.57   47.70
  -1  -1   3 1261.17   46.00
  -1  -1   3 1368.16   46.50
   0   1  -3 1302.57   44.90
   0   1  -3 1222.08   44.30
   0   1  -3 1194.28   43.90
   0   1  -3 1301.77   44.20
   0   1  -3 1227.78   43.40
   0   1  -3 1233.88   43.70
   0  -1   3 1221.88   43.40
   0  -1   3 1223.08   43.20
   0  -1   3 1214.78   44.50
   0  -1   3 1238.48   44.20
   0  -1   3 1190.28   43.70
  -1   1  -3 1481.35   53.49
  -1   1  -3 1552.64   52.69
  -1   1  -3 1433.76   53.39
  -1   1  -3 1516.05   53.49
  -1   1  -3 1472.75   53.79
   1  -1   3 1527.55   53.59
   1  -1   3 1542.95   53.29
   1  -1   3 1462.45   53.39
  -2   1  -3  554.44   21.00
  -2   1  -3  601.14   22.90
  -2   1  -3  586.54   22.50
  -2   1  -3  512.05   22.10
  -2   1  -3  573.44   22.20
   2  -1   3  572.24   22.00
   2  -1   3  606.84   22.00
   2  -1   3  574.94   22.70
   2  -1   3  557.24   22.20
  -3   1  -3  573.94   23.90
  -3   1  -3  581.34   23.40
  -3   1  -3  579.24   21.80
  -3   1  -3  583.44   22.10
  -3   1  -3  587.04   23.40
  -3   1  -3  591.34   23.60
  -3   1  -3  584.34   23.10
   3  -1   3  583.24   23.00
   3  -1   3  603.54   24.00
   3  -1   3  572.74   22.90
   3  -1   3  556.74   21.30
  -4   1  -3  843.62   33.20
  -4   1  -3  839.02   31.10
  -4   1  -3  808.52   32.30
  -4   1  -3  818.02   32.60
  -4   1  -3  795.82   32.60
  -4   1  -3  823.62   32.50
  -4   1  -3  789.22   30.40
   4  -1   3  799.32   32.00
   4  -1   3  806.32   29.80
   4  -1   3  823.82   33.00
   4  -1   3  816.92   30.10
   4  -1   3  852.01   32.00
  -5   1  -3  837.52   34.10
  -5   1  -3  802.62   34.20
  -5   1  -3  821.62   32.40
  -5   1  -3  866.01   34.00
  -5   1  -3  830.82   34.20
  -5   1  -3  797.02   34.40
   5  -1   3  848.02   34.70
   5  -1   3  884.31   33.70
   5  -1   3  817.32   30.60
   5  -1   3  811.42   31.00
  -6   1  -3   10.50    5.00
  -6   1  -3   14.10    5.20
  -6   1  -3   17.90    4.50
  -6   1  -3   10.20    4.90
  -6   1  -3   14.40    4.90
  -6   1  -3   23.60    6.00
   6  -1   3    9.90    2.60
   6  -1   3   14.80    4.40
   6  -1   3   14.40    4.70
   6  -1   3   13.20    2.90
  -7   1  -3  180.28   11.90
  -7   1  -3  175.08   13.50
  -7   1  -3  181.08   12.70
  -7   1  -3  171.68   13.50
  -7   1  -3  160.48   13.80
   7  -1   3  173.18   13.00
   7  -1   3  170.48    9.30
   7  -1   3  161.18    8.70
   7  -1   3  153.48   11.70
  -8   1  -3    4.20    5.40
  -8   1  -3    2.80    5.70
  -8   1  -3   11.60    5.20
  -8   1  -3    2.70    5.60
  -8   1  -3   13.40    6.60
   8  -1   3    9.30    5.00
   8  -1   3    3.20    2.70
   8  -1   3    3.00    3.10
   8  -1   3    6.80    5.50
  -9   1  -3   10.70    7.20
  -9   1  -3    7.40    5.60
  -9   1  -3   15.70    6.90
  -9   1  -3   12.30    7.00
   9  -1   3   14.30    6.90
   9  -1   3   12.10    3.80
 -10   1  -3   17.90    8.60
 -10   1  -3   24.80    8.60
 -10   1  -3   14.80    6.60
 -10   1  -3   12.00    7.40
  10  -1   3   19.90    8.20
  10  -1   3   17.70    4.20
 -11   1  -3   40.80   10.60
 -11   1  -3   33.80   10.70
 -11   1  -3   81.39   12.80
 -11   1  -3   39.30   11.10
  11  -1   3   57.29    7.10
 -11   0   3   73.89   12.70
 -11   0   3   95.79   14.50
 -11   0   3  100.59   17.50
  10   0  -3  179.48   11.50
  10   0  -3  151.28   15.70
 -10   0   3  171.88   15.20
 -10   0   3  198.48   19.50
 -10   0   3  155.88   14.80
   9   0  -3   99.19    8.60
   9   0  -3  114.69   12.90
  -9   0   3  100.49   11.60
  -9   0   3  107.39   12.20
  -9   0   3  138.09   14.60
  -9   0   3  101.39   14.60
   8   0  -3   38.60    8.60
   8   0  -3   27.50    7.60
   8   0  -3   38.90    5.90
  -8   0   3   32.50    8.80
  -8   0   3   24.50    6.90
  -8   0   3   37.80    8.30
  -8   0   3   25.70    6.60
   7   0  -3  192.88   14.20
   7   0  -3  196.28   14.60
   7   0  -3  187.28   10.40
  -7   0   3  194.88   15.40
  -7   0   3  168.48   13.70
  -7   0   3  212.38   13.70
  -7   0   3  197.88   13.00
  -7   0   3  174.88   14.80
   6   0  -3   14.30    5.00
   6   0  -3   16.20    5.30
   6   0  -3   13.20    4.90
   6   0  -3   20.40    4.10
   6   0  -3   15.40    5.20
  -6   0   3   15.70    4.60
  -6   0   3   16.80    4.70
  -6   0   3   19.70    6.00
  -6   0   3   27.30    7.10
  -6   0   3   15.50    5.50
  -6   0   3   11.10    4.80
   5   0  -3   69.79    7.80
   5   0  -3   77.39    5.50
   5   0  -3   76.89    7.50
   5   0  -3   74.39    7.60
   5   0  -3   57.89    7.70
  -5   0   3   69.59    7.40
  -5   0   3   78.79    8.70
  -5   0   3   74.69    8.10
  -5   0   3   72.59    7.20
  -5   0   3   69.39    7.70
  -5   0   3   61.49    8.10
   4   0  -3   15.60    3.60
   4   0  -3   12.60    3.90
   4   0  -3   30.20    6.00
   4   0  -3   23.50    4.60
   4   0  -3   24.20    3.50
   4   0  -3   25.20    5.00
  -4   0   3   12.90    3.50
  -4   0   3   27.80    3.50
  -4   0   3   24.10    5.10
  -4   0   3   22.40    5.00
  -4   0   3   23.90    5.10
  -4   0   3   29.20    5.40
   3   0  -3  286.37   12.60
   3   0  -3  285.87   13.30
   3   0  -3  278.87   14.00
   3   0  -3  280.57   11.50
   3   0  -3  267.17   13.70
   3   0  -3  269.17   13.70
  -3   0   3  285.17   14.20
  -3   0   3  255.77   13.00
  -3   0   3  269.97   13.50
  -3   0   3  272.77   13.90
  -3   0   3  276.17   11.50
  -3   0   3  294.17   12.90
   2   0  -3   31.70    4.20
   2   0  -3   25.20    3.70
   2   0  -3   19.10    4.70
   2   0  -3   19.00    3.00
   2   0  -3   19.30    4.10
   2   0  -3   25.10    4.80
  -2   0   3   20.90    4.60
  -2   0   3   20.00    3.90
  -2   0   3   26.30    4.40
  -2   0   3   21.70    4.10
  -2   0   3   21.40    2.70
  -2   0   3   23.50    3.90
   1   0  -3   13.60    2.80
   1   0  -3   15.40    3.30
   1   0  -3   18.00    3.70
   1   0  -3    7.60    3.00
   1   0  -3   16.30    3.20
   1   0  -3   20.30    3.80
  -1   0   3   14.40    3.00
  -1   0   3   19.20    3.50
  -1   0   3   16.70    4.10
  -1   0   3   14.50    3.20
  -1   0   3   13.10    2.50
   0   0  -3   35.90    3.50
   0   0  -3   40.70    3.80
   0   0  -3   36.00    3.20
   0   0  -3   40.40    3.60
   0   0  -3   37.60    4.20
   0   0   3   33.40    3.40
   0   0   3   39.10    4.00
   0   0   3   40.30    3.20
   0   0   3   40.40    3.60
   0   0   3   35.40    3.30
  -1   0  -3   11.70    2.50
  -1   0  -3   12.90    3.20
  -1   0  -3   25.50    3.80
  -1   0  -3   14.50    2.60
   1   0   3   20.80    3.40
   1   0   3   16.80    2.90
   1   0   3   15.00    3.30
   1   0   3   12.40    2.60
  -2   0  -3   -1.40    2.40
  -2   0  -3    2.80    2.20
  -2   0  -3    2.50    1.90
  -2   0  -3    0.00    2.30
  -2   0  -3    2.90    2.80
  -2   0  -3    2.80    2.50
   2   0   3    0.70    2.10
   2   0   3    1.30    2.40
   2   0   3    2.30    1.80
   2   0   3    0.00    2.20
   2   0   3    3.40    1.80
   2   0   3    3.60    2.20
  -3   0  -3   40.00    5.20
  -3   0  -3   29.20    4.30
  -3   0  -3   29.70    4.00
  -3   0  -3   29.40    4.60
  -3   0  -3   38.20    3.60
  -3   0  -3   24.00    4.50
  -3   0  -3   36.10    5.00
   3   0   3   22.90    3.20
   3   0   3   40.60    4.70
   3   0   3   33.10    3.30
   3   0   3   25.90    4.10
   3   0   3   30.70    4.40
   3   0   3   34.80    4.50
  -4   0  -3   27.30    5.00
  -4   0  -3   34.10    5.80
  -4   0  -3   41.90    5.60
  -4   0  -3   28.10    3.80
  -4   0  -3   45.40    6.00
  -4   0  -3   33.90    5.90
  -4   0  -3   37.80    4.80
   4   0   3   26.60    4.90
   4   0   3   25.90    4.70
   4   0   3   30.10    4.90
   4   0   3   32.70    3.90
   4   0   3   33.60    3.50
   4   0   3   29.60    4.80
  -5   0  -3    0.20    3.50
  -5   0  -3   -1.30    3.20
  -5   0  -3    1.20    3.30
  -5   0  -3    1.10    3.10
  -5   0  -3   -0.60    3.70
  -5   0  -3   -2.30    2.90
   5   0   3    0.20    2.80
   5   0   3   -2.50    1.70
   5   0   3    0.50    2.80
   5   0   3   -1.60    2.10
   5   0   3    0.80    2.90
   5   0   3    1.10    3.10
  -6   0  -3    6.10    4.50
  -6   0  -3   16.60    5.60
  -6   0  -3   11.50    4.90
  -6   0  -3   29.70    6.40
  -6   0  -3   13.30    5.00
  -6   0  -3   16.10    4.60
   6   0   3   19.60    5.00
   6   0   3   17.50    5.10
   6   0   3   10.80    4.00
   6   0   3    9.30    3.20
   6   0   3   14.40    3.00
  -7   0  -3   -2.30    4.70
  -7   0  -3    0.90    4.10
  -7   0  -3   -1.40    4.20
  -7   0  -3   -2.40    3.70
  -7   0  -3    3.30    4.90
   7   0   3    3.00    2.70
   7   0   3   -4.80    3.30
   7   0   3   -0.40    3.60
   7   0   3    3.80    3.80
  -8   0  -3   42.20    8.80
  -8   0  -3   54.59   11.20
  -8   0  -3   49.40   10.10
  -8   0  -3   32.10    8.10
  -8   0  -3   41.90    8.30
   8   0   3   39.30    8.00
   8   0   3   53.39    9.00
   8   0   3   36.40    5.40
   8   0   3   46.70    8.50
  -9   0  -3   48.60    9.40
  -9   0  -3   54.79    9.60
  -9   0  -3   43.00   10.10
  -9   0  -3   49.30   11.40
   9   0   3   38.90    9.10
   9   0   3   37.90    6.00
 -10   0  -3   73.59   14.10
 -10   0  -3   51.89   10.80
 -10   0  -3   61.59   13.10
 -10   0  -3   53.29   11.80
  10   0   3   69.19   11.80
  10   0   3   73.39    7.50
 -11   0  -3   64.19   12.30
 -11   0  -3   68.79   13.70
 -11   0  -3   71.69   16.20
  11   0   3   64.49    7.80
  11   0   3   58.69   12.00
 -12   0  -3    8.30    8.20
 -12   0  -3    8.50    9.10
  12   0   3    7.80    4.60
  11  -1  -3   83.19   13.70
 -11   1   3  102.19   17.50
 -11   1   3  122.09   14.60
 -11   1   3  120.39   15.40
  10  -1  -3    9.30    7.10
  10  -1  -3   -1.70    5.60
 -10   1   3   21.20    9.30
 -10   1   3   18.20    8.20
 -10   1   3    8.10    6.60
 -10   1   3    9.80    7.40
   9  -1  -3    6.40    5.80
   9  -1  -3   11.30    6.40
  -9   1   3    4.50    5.60
  -9   1   3    1.10    5.70
  -9   1   3   14.20    7.70
  -9   1   3    3.90    5.70
   8  -1  -3   51.39    9.20
  -8   1   3   48.70   11.40
  -8   1   3   46.00    9.70
  -8   1   3   45.00    8.40
  -8   1   3   46.90    8.80
   7  -1  -3    4.30    4.30
   7  -1  -3    5.80    4.70
   7  -1  -3    3.40    2.80
   7  -1  -3   -0.30    3.90
  -7   1   3   -0.10    4.00
  -7   1   3    2.10    5.50
  -7   1   3   -2.00    4.00
  -7   1   3   -2.40    4.20
  -7   1   3    9.20    5.10
   6  -1  -3  347.87   17.70
   6  -1  -3  302.57   17.90
   6  -1  -3  329.07   17.70
   6  -1  -3  328.97   14.50
   6  -1  -3  349.57   18.80
  -6   1   3  311.07   18.90
  -6   1   3  337.77   18.00
  -6   1   3  337.77   19.10
  -6   1   3  335.37   17.00
  -6   1   3  335.67   17.90
   5  -1  -3  132.39   10.50
   5  -1  -3  136.09   10.00
   5  -1  -3  137.99    9.60
   5  -1  -3  157.58    7.60
   5  -1  -3  139.89   10.50
   5  -1  -3  129.19    8.20
  -5   1   3  115.49   10.30
  -5   1   3  124.39   10.80
  -5   1   3  120.49    9.80
  -5   1   3  124.69    9.10
  -5   1   3  139.99   10.50
   4  -1  -3  184.28   10.10
   4  -1  -3  177.68   10.10
   4  -1  -3  171.58    9.10
   4  -1  -3  153.68   10.60
   4  -1  -3  186.38   10.80
   4  -1  -3  183.48   11.20
  -4   1   3  164.78   10.80
  -4   1   3  149.69   10.10
  -4   1   3  166.18   11.20
  -4   1   3  170.48   11.20
  -4   1   3  179.88    9.90
   3  -1  -3  259.27   12.30
   3  -1  -3  233.78   12.30
   3  -1  -3  221.08   11.40
   3  -1  -3  230.48   10.80
   3  -1  -3  238.18   11.60
   3  -1  -3  251.37   12.60
  -3   1   3  244.78   11.90
  -3   1   3  224.18   12.40
  -3   1   3  240.48   12.50
  -3   1   3  252.27   10.20
  -3   1   3  243.58   12.40
  -3   1   3  213.98   11.10
   2  -1  -3   15.20    3.50
   2  -1  -3   14.70    2.60
   2  -1  -3   12.60    3.30
   2  -1  -3   12.40    3.20
   2  -1  -3   16.30    3.40
   2  -1  -3   13.50    3.10
  -2   1   3   14.50    2.80
  -2   1   3   13.70    3.40
  -2   1   3   13.20    2.30
  -2   1   3   15.70    3.70
  -2   1   3   13.20    3.30
  -2   1   3   12.20    3.30
   1  -1  -3  663.73   24.40
   1  -1  -3  665.53   25.40
   1  -1  -3  667.33   24.90
   1  -1  -3  629.94   25.10
   1  -1  -3  665.43   25.20
  -1   1   3  645.04   24.90
  -1   1   3  680.63   25.30
  -1   1   3  650.13   24.80
  -1   1   3  667.93   25.60
  -1   1   3  679.23   24.70
  -1   1   3  672.63   25.30
   0  -1  -3  624.14   22.30
   0  -1  -3  572.14   23.10
   0  -1  -3  625.74   22.80
   0  -1  -3  608.34   22.80
   0   1   3  596.64   23.20
   0   1   3  610.34   22.80
   0   1   3  615.64   22.90
   0   1   3  612.14   22.40
   0   1   3  597.24   22.80
   0   1   3  624.14   22.90
  -1  -1  -3 2746.93  101.29
  -1  -1  -3 2777.62  100.99
  -1  -1  -3 2952.00  100.49
  -1  -1  -3 2848.01  100.39
  -1  -1  -3 3004.20  101.19
   1   1   3 2913.61  100.39
   1   1   3 2873.41  100.89
   1   1   3 2923.31  101.49
   1   1   3 2925.81  100.49
   1   1   3 2813.02  101.09
  -2  -1  -3  202.58    9.40
  -2  -1  -3  200.78   10.00
  -2  -1  -3  199.08    9.50
  -2  -1  -3  198.08   10.20
  -2  -1  -3  211.88   10.10
  -2  -1  -3  217.28    9.20
  -2  -1  -3  208.68    8.90
   2   1   3  200.78    9.80
   2   1   3  196.28    8.90
   2   1   3  203.18    9.20
   2   1   3  198.38    9.50
   2   1   3  195.28    8.90
   2   1   3  201.68    9.90
   2   1   3  195.28    9.90
  -3  -1  -3   47.00    4.80
  -3  -1  -3   51.59    5.60
  -3  -1  -3   46.50    4.10
  -3  -1  -3   43.90    4.80
  -3  -1  -3   49.10    5.80
  -3  -1  -3   42.20    5.40
  -3  -1  -3   42.90    4.70
   3   1   3   47.80    4.50
   3   1   3   48.50    5.30
   3   1   3   52.69    4.10
   3   1   3   42.20    4.10
   3   1   3   54.89    5.30
   3   1   3   43.00    4.60
   3   1   3   57.69    5.30
  -4  -1  -3    1.80    2.80
  -4  -1  -3   -3.70    3.00
  -4  -1  -3    0.30    2.90
  -4  -1  -3    0.70    2.10
  -4  -1  -3   -2.40    2.50
  -4  -1  -3   -3.50    2.70
  -4  -1  -3    3.10    2.80
   4   1   3    1.20    2.40
   4   1   3    0.30    1.90
   4   1   3   -0.90    2.50
   4   1   3    1.80    2.80
   4   1   3    5.00    2.20
   4   1   3   -0.30    2.40
  -5  -1  -3 1080.69   40.20
  -5  -1  -3 1037.00   40.40
  -5  -1  -3 1071.89   41.60
  -5  -1  -3 1058.69   42.00
  -5  -1  -3 1079.19   42.20
  -5  -1  -3 1001.20   41.70
   5   1   3 1068.19   39.60
   5   1   3 1034.90   38.80
   5   1   3  990.70   40.90
   5   1   3 1065.29   41.60
   5   1   3  973.20   41.30
   5   1   3 1080.89   41.40
  -6  -1  -3  420.16   19.60
  -6  -1  -3  400.66   21.30
  -6  -1  -3  422.06   20.90
  -6  -1  -3  450.15   21.70
  -6  -1  -3  414.06   21.10
  -6  -1  -3  404.66   19.30
   6   1   3  428.66   20.70
   6   1   3  399.56   17.60
   6   1   3  433.86   20.50
   6   1   3  421.16   21.00
   6   1   3  417.36   20.40
  -7  -1  -3   49.10    9.20
  -7  -1  -3   54.69    7.80
  -7  -1  -3   50.79    7.60
  -7  -1  -3   61.89   10.10
  -7  -1  -3   53.89    9.00
   7   1   3   62.19    5.90
   7   1   3   53.19    7.70
   7   1   3   52.99    8.10
  -8  -1  -3  127.99   11.40
  -8  -1  -3  120.29   11.00
  -8  -1  -3  114.29   12.50
  -8  -1  -3  118.29   13.20
  -8  -1  -3  124.39   13.00
   8   1   3  111.79    8.40
   8   1   3  115.09   11.70
   8   1   3  121.69   11.50
  -9  -1  -3  147.69   13.50
  -9  -1  -3  159.78   15.30
  -9  -1  -3  127.09   12.40
  -9  -1  -3  148.39   15.50
   9   1   3  134.29    9.50
   9   1   3  119.09   12.60
 -10  -1  -3  475.75   26.80
 -10  -1  -3  543.05   28.10
 -10  -1  -3  531.85   30.90
 -10  -1  -3  555.54   31.00
  10   1   3  512.25   23.30
  10   1   3  571.94   29.90
 -11  -1  -3  308.57   20.70
 -11  -1  -3  302.07   24.50
 -11  -1  -3  329.57   21.80
  11   1   3  294.37   16.10
  11   1   3  293.17   21.80
 -12  -1  -3   46.80   11.60
 -12  -1  -3   40.70   10.40
  12   1   3   51.19    8.10
  11  -2  -3    9.90    8.00
 -11   2   3    0.50    6.70
 -11   2   3   -2.50    8.20
 -11   2   3   -6.70    7.00
  10  -2  -3  102.89   13.10
  10  -2  -3   72.89   12.50
 -10   2   3   81.29   13.50
 -10   2   3   62.79   11.50
 -10   2   3   85.89   14.30
 -10   2   3   88.69   15.20
   9  -2  -3   -1.20    5.60
   9  -2  -3    3.80    5.90
  -9   2   3   -0.80    5.20
  -9   2   3    3.30    6.20
  -9   2   3   -0.40    6.40
  -9   2   3    5.00    6.60
   8  -2  -3   10.30    5.90
   8  -2  -3    7.40    5.70
   8  -2  -3   18.40    5.80
  -8   2   3    9.70    6.10
  -8   2   3   15.70    6.20
  -8   2   3    7.00    5.60
  -8   2   3   19.80    7.40
   7  -2  -3  287.37   15.40
   7  -2  -3  229.58   16.40
   7  -2  -3  265.57   16.20
   7  -2  -3  245.18   12.60
   7  -2  -3  249.48   15.80
  -7   2   3  254.47   16.60
  -7   2   3  215.28   16.70
  -7   2   3  262.87   16.60
  -7   2   3  295.87   15.80
  -7   2   3  228.68   17.00
   6  -2  -3   76.59    6.00
   6  -2  -3   65.39    7.50
   6  -2  -3   59.49    7.80
   6  -2  -3   79.29    9.00
   6  -2  -3   58.59    7.80
  -6   2   3   78.79    8.10
  -6   2   3   76.49    9.30
  -6   2   3   60.79    8.20
  -6   2   3   61.09    9.30
  -6   2   3   67.99    9.10
   5  -2  -3   28.00    5.70
   5  -2  -3   30.40    4.20
   5  -2  -3   32.40    5.60
   5  -2  -3   30.30    6.10
   5  -2  -3   23.50    5.40
  -5   2   3   33.20    6.60
  -5   2   3   21.30    5.70
  -5   2   3   24.30    5.50
  -5   2   3   17.50    4.90
  -5   2   3   31.30    6.40
   4  -2  -3  253.27   12.40
   4  -2  -3  254.37   13.20
   4  -2  -3  229.38   12.20
   4  -2  -3  243.48   13.10
   4  -2  -3  233.68   10.70
   4  -2  -3  255.07   13.90
  -4   2   3  233.78   13.40
  -4   2   3  229.88   13.50
  -4   2   3  236.58   13.50
  -4   2   3  242.58   12.80
  -4   2   3  227.08   11.90
   3  -2  -3  211.78   10.80
   3  -2  -3  235.58   11.50
   3  -2  -3  228.38   12.10
   3  -2  -3  226.18   10.80
   3  -2  -3  207.78   11.60
  -3   2   3  230.98   11.20
  -3   2   3  224.88   11.90
  -3   2   3  221.98   11.80
  -3   2   3  213.78   10.50
  -3   2   3  222.48   11.90
  -3   2   3  210.58    9.30
   2  -2  -3  257.37   11.20
   2  -2  -3  221.98   12.10
   2  -2  -3  253.77   12.20
   2  -2  -3  241.98   10.90
   2  -2  -3  262.97   11.80
  -2   2   3  243.28   11.80
  -2   2   3  242.58   11.90
  -2   2   3  262.17   12.10
  -2   2   3  255.07   11.40
  -2   2   3  251.07   11.70
  -2   2   3  261.17   10.90
   1  -2  -3 1427.96   49.30
   1  -2  -3 1306.17   49.99
   1  -2  -3 1374.16   50.79
   1  -2  -3 1418.46   49.90
   1  -2  -3 1375.56   49.40
   1  -2  -3 1404.06   49.40
  -1   2   3 1383.06   49.60
  -1   2   3 1373.36   49.00
  -1   2   3 1385.66   49.80
  -1   2   3 1366.66   49.99
  -1   2   3 1378.26   50.49
  -1   2   3 1387.16   50.19
   0  -2  -3  284.97   11.90
   0  -2  -3  266.47   11.20
   0  -2  -3  293.17   12.90
   0  -2  -3  284.87   11.50
   0  -2  -3  274.77   11.10
   0   2   3  296.77   12.10
   0   2   3  295.77   11.70
   0   2   3  265.47   11.60
   0   2   3  299.57   12.80
  -1  -2  -3  572.34   22.50
  -1  -2  -3  610.54   23.00
  -1  -2  -3  605.44   21.90
  -1  -2  -3  597.54   22.40
  -1  -2  -3  614.84   23.10
  -1  -2  -3  602.54   22.80
   1   2   3  581.14   22.90
   1   2   3  605.14   23.10
   1   2   3  608.24   22.10
   1   2   3  599.64   22.80
   1   2   3  589.54   22.60
   1   2   3  629.34   22.20
  -2  -2  -3  528.15   20.60
  -2  -2  -3  525.15   20.00
  -2  -2  -3  508.65   20.60
  -2  -2  -3  514.25   19.40
  -2  -2  -3  502.55   20.00
   2   2   3  515.85   20.80
   2   2   3  523.85   19.60
   2   2   3  530.75   20.80
   2   2   3  510.15   19.80
   2   2   3  500.65   19.60
   2   2   3  510.85   20.60
  -3  -2  -3  740.83   28.40
  -3  -2  -3  718.23   28.30
  -3  -2  -3  747.13   27.70
  -3  -2  -3  718.43   28.30
  -3  -2  -3  679.43   27.00
  -3  -2  -3  679.23   26.90
  -3  -2  -3  717.53   26.60
   3   2   3  713.73   26.60
   3   2   3  732.33   27.60
   3   2   3  682.83   26.80
   3   2   3  704.33   28.30
   3   2   3  713.63   28.10
   3   2   3  677.63   28.00
  -4  -2  -3  155.98    9.60
  -4  -2  -3  197.48   11.20
  -4  -2  -3  163.98   10.60
  -4  -2  -3  185.48    9.60
  -4  -2  -3  172.98   10.70
  -4  -2  -3  159.98    8.70
  -4  -2  -3  173.88    9.30
   4   2   3  174.38    8.70
   4   2   3  189.58   10.00
   4   2   3  159.98   10.30
   4   2   3  168.08   10.20
   4   2   3  178.88   10.80
  -5  -2  -3 1459.25   56.39
  -5  -2  -3 1525.05   58.29
  -5  -2  -3 1486.45   55.69
  -5  -2  -3 1580.54   58.89
  -5  -2  -3 1523.85   58.49
  -5  -2  -3 1576.14   57.89
  -5  -2  -3 1515.55   56.39
   5   2   3 1527.05   57.79
   5   2   3 1503.65   55.39
   5   2   3 1496.35   57.89
   5   2   3 1491.85   58.39
   5   2   3 1572.44   57.79
  -6  -2  -3  192.28   13.60
  -6  -2  -3  171.08   11.30
  -6  -2  -3  173.78   12.10
  -6  -2  -3  173.08   13.20
  -6  -2  -3  188.28   13.00
  -6  -2  -3  205.68   11.80
   6   2   3  191.98   12.40
   6   2   3  199.58   12.30
   6   2   3  210.88   13.10
   6   2   3  201.58   10.30
   6   2   3  196.58   13.30
  -7  -2  -3  535.35   24.20
  -7  -2  -3  528.25   26.70
  -7  -2  -3  549.45   26.90
  -7  -2  -3  533.65   24.20
  -7  -2  -3  552.04   26.60
   7   2   3  547.55   25.60
   7   2   3  489.55   25.80
   7   2   3  516.35   25.30
   7   2   3  543.05   22.40
  -8  -2  -3   92.69   10.10
  -8  -2  -3  120.59   12.60
  -8  -2  -3  118.09   11.00
  -8  -2  -3   83.19   12.50
   8   2   3  114.19    8.50
   8   2   3  116.69   11.10
   8   2   3  125.49   12.30
  -9  -2  -3    1.50    5.20
  -9  -2  -3   -8.40    4.50
  -9  -2  -3   -3.80    5.10
  -9  -2  -3   -7.30    5.80
   9   2   3    0.30    4.50
   9   2   3   -1.80    3.40
   9   2   3    1.90    5.50
 -10  -2  -3   36.80    8.80
 -10  -2  -3   42.30   10.80
 -10  -2  -3   41.80    9.00
  10   2   3   26.20    8.20
  10   2   3   25.30    5.50
 -11  -2  -3   50.99   12.90
 -11  -2  -3   78.99   12.60
 -11  -2  -3   75.19   13.30
  11   2   3   60.49   11.80
  11   2   3   68.39    8.60
 -12  -2  -3  337.77   22.90
 -12  -2  -3  320.07   22.50
  12   2   3  306.57   17.50
  11  -3  -3  140.39   17.00
 -11   3   3  155.38   19.60
 -11   3   3  119.99   17.20
 -11   3   3  124.49   18.30
 -11   3   3  146.69   15.70
  10  -3  -3   -2.10    6.50
  10  -3  -3    2.10    7.10
 -10   3   3   -4.00    6.70
 -10   3   3    1.50    6.30
 -10   3   3    2.30    8.10
 -10   3   3    1.00    6.90
   9  -3  -3  101.89   13.10
   9  -3  -3   89.29   12.40
  -9   3   3   91.39   14.00
  -9   3   3  107.19   12.00
  -9   3   3   67.59   12.50
  -9   3   3  103.89   13.70
   8  -3  -3   13.30    6.60
   8  -3  -3   10.70    6.10
  -8   3   3   34.50    7.40
  -8   3   3   16.80    7.50
  -8   3   3   21.40    7.40
  -8   3   3   21.30    7.20
   7  -3  -3  896.41   37.30
   7  -3  -3  923.11   39.80
   7  -3  -3  864.71   35.20
   7  -3  -3  875.41   38.60
  -7   3   3  855.91   38.50
  -7   3   3  845.72   37.80
  -7   3   3  803.72   38.90
  -7   3   3  877.61   39.10
  -7   3   3  887.01   36.50
   6  -3  -3 1820.12   67.09
   6  -3  -3 1843.52   68.99
   6  -3  -3 1767.82   70.09
   6  -3  -3 1782.62   70.89
  -6   3   3 1839.12   70.39
  -6   3   3 1800.82   70.49
  -6   3   3 1810.32   69.39
  -6   3   3 1838.32   70.89
  -6   3   3 1828.52   68.09
   5  -3  -3  161.88    9.20
   5  -3  -3  186.08   12.10
   5  -3  -3  154.78   11.40
   5  -3  -3  142.89   10.00
  -5   3   3  149.49   10.70
  -5   3   3  148.89    9.80
  -5   3   3  159.28   11.60
  -5   3   3  148.99   11.40
  -5   3   3  141.69   11.30
   4  -3  -3 1466.15   58.69
   4  -3  -3 1533.65   57.09
   4  -3  -3 1526.15   58.89
   4  -3  -3 1538.15   55.69
  -4   3   3 1623.44   58.19
  -4   3   3 1578.64   57.39
  -4   3   3 1547.95   56.29
  -4   3   3 1449.26   58.49
  -4   3   3 1538.15   58.49
   3  -3  -3   20.20    4.20
   3  -3  -3   16.70    3.50
   3  -3  -3   21.40    4.80
   3  -3  -3   18.00    5.00
   3  -3  -3   16.50    3.00
  -3   3   3   21.60    4.30
  -3   3   3   21.60    4.60
  -3   3   3   18.80    4.20
  -3   3   3   14.60    3.80
  -3   3   3   18.20    4.10
  -3   3   3   18.80    3.40
   2  -3  -3   32.00    4.50
   2  -3  -3   43.90    5.80
   2  -3  -3   26.00    3.10
   2  -3  -3   27.90    3.60
  -2   3   3   26.10    4.20
  -2   3   3   26.90    3.70
  -2   3   3   21.50    4.10
  -2   3   3   32.40    4.70
  -2   3   3   29.20    4.20
   1  -3  -3  341.27   12.70
   1  -3  -3  332.67   15.60
   1  -3  -3  312.77   14.00
   1  -3  -3  331.17   13.00
  -1   3   3  338.77   13.90
  -1   3   3  347.07   13.50
  -1   3   3  316.27   13.90
  -1   3   3  334.67   15.20
  -1   3   3  341.77   13.40
   0  -3  -3  158.68    7.30
   0  -3  -3  160.18    6.60
   0  -3  -3  154.78    6.80
   0  -3  -3  154.78    9.20
   0   3   3  147.29    6.90
   0   3   3  163.58    7.30
   0   3   3  165.88    9.10
   0   3   3  161.58    7.70
   0   3   3  150.58    6.70
  -1  -3  -3  258.17   10.40
  -1  -3  -3  243.58   10.40
   1   3   3  233.18   10.70
   1   3   3  250.47   10.70
   1   3   3  229.98   10.80
   1   3   3  230.78   10.20
   1   3   3  244.28   10.10
  -2  -3  -3  129.99    7.10
  -2  -3  -3  111.09    6.20
  -2  -3  -3  122.89    7.20
  -2  -3  -3  128.89    7.40
  -2  -3  -3  120.49    7.00
  -2  -3  -3  126.89    6.40
   2   3   3  120.99    7.40
   2   3   3  129.99    7.40
   2   3   3  126.19    7.50
   2   3   3  125.49    6.20
   2   3   3  132.49    6.80
  -3  -3  -3 1130.09   41.50
  -3  -3  -3 1024.50   42.30
  -3  -3  -3 1143.79   42.80
  -3  -3  -3 1094.59   42.30
  -3  -3  -3 1106.29   41.60
  -3  -3  -3 1130.19   41.10
  -3  -3  -3 1125.19   40.70
   3   3   3 1144.59   41.60
   3   3   3 1167.28   41.50
   3   3   3 1168.68   42.70
   3   3   3 1137.19   41.10
   3   3   3 1122.69   41.20
   3   3   3 1164.58   42.70
   3   3   3 1099.79   42.80
  -4  -3  -3   16.40    4.60
  -4  -3  -3   15.80    4.40
  -4  -3  -3    9.00    3.30
  -4  -3  -3   12.40    3.30
  -4  -3  -3   15.00    3.00
  -4  -3  -3   22.80    4.30
   4   3   3   20.00    4.60
   4   3   3   19.60    3.60
   4   3   3   18.20    3.90
   4   3   3    9.40    3.00
   4   3   3   19.10    4.30
   4   3   3   19.50    4.30
  -5  -3  -3  113.69    7.70
  -5  -3  -3  130.49   10.50
  -5  -3  -3  140.29    8.60
  -5  -3  -3  128.59    8.70
  -5  -3  -3  135.09    9.10
  -5  -3  -3  113.39    9.70
  -5  -3  -3  105.29    9.90
   5   3   3  126.29    9.60
   5   3   3  129.19   10.10
   5   3   3  117.69    8.80
   5   3   3  120.29   10.00
   5   3   3  148.99    8.10
  -6  -3  -3    9.10    5.30
  -6  -3  -3    8.10    4.60
  -6  -3  -3    6.90    3.90
  -6  -3  -3    7.80    4.90
  -6  -3  -3    2.80    3.40
   6   3   3    1.40    3.50
   6   3   3    4.50    3.80
   6   3   3   13.20    5.10
   6   3   3    1.70    2.90
  -7  -3  -3   11.40    4.70
  -7  -3  -3    9.00    5.20
  -7  -3  -3   22.00    5.20
  -7  -3  -3   12.90    5.40
  -7  -3  -3   10.30    6.60
   7   3   3   16.10    6.10
   7   3   3   18.40    4.30
   7   3   3   18.30    5.50
   7   3   3   19.90    5.60
  -8  -3  -3   16.60    5.80
  -8  -3  -3   17.00    6.50
  -8  -3  -3   23.30    6.00
  -8  -3  -3   25.00    8.20
   8   3   3   19.00    7.10
   8   3   3   17.00    6.10
   8   3   3    6.70    4.80
   8   3   3   14.30    4.20
  -9  -3  -3   32.10    7.40
  -9  -3  -3   32.70    9.50
  -9  -3  -3   59.79    9.40
   9   3   3   49.10   10.60
   9   3   3   39.20    6.90
   9   3   3   41.90    8.80
 -10  -3  -3  229.88   20.30
 -10  -3  -3  232.08   16.60
 -10  -3  -3  242.18   17.00
  10   3   3  228.48   17.50
  10   3   3  207.78   13.50
 -11  -3  -3   48.10    9.80
 -11  -3  -3   51.09   12.80
 -11  -3  -3   52.39   11.90
  11   3   3   36.00    7.80
  11   3   3   39.80    9.70
  10  -4  -3   63.69   13.00
 -10   4   3   54.99   12.00
 -10   4   3   41.00    9.10
 -10   4   3   73.99   14.00
 -10   4   3   39.20   10.70
   9  -4  -3   59.39   11.60
   9  -4  -3   86.79   13.00
  -9   4   3   62.39   10.50
  -9   4   3   76.99   13.40
  -9   4   3   74.39   13.10
  -9   4   3   65.09   12.50
   8  -4  -3  119.99   13.30
   8  -4  -3  130.39   13.80
  -8   4   3  119.89   11.70
  -8   4   3  130.79   14.10
  -8   4   3  125.99   14.40
  -8   4   3  138.79   13.50
   7  -4  -3   39.40    9.10
   7  -4  -3   37.40    8.60
   7  -4  -3   39.70    7.00
  -7   4   3   34.10    8.40
  -7   4   3   45.20    9.00
  -7   4   3   41.10    8.90
  -7   4   3   63.99   10.00
  -7   4   3   53.59    8.20
   6  -4  -3  123.49   12.10
   6  -4  -3  123.89   11.40
   6  -4  -3  132.99    9.50
  -6   4   3  121.29   11.60
  -6   4   3  106.79   11.80
  -6   4   3  139.39   11.00
  -6   4   3  121.19   11.50
  -6   4   3  117.19    9.50
   5  -4  -3  250.47   12.90
   5  -4  -3  268.07   16.10
   5  -4  -3  230.08   15.00
  -5   4   3  253.27   14.00
  -5   4   3  264.97   13.10
  -5   4   3  262.37   15.00
  -5   4   3  248.88   14.90
  -5   4   3  251.37   15.50
   4  -4  -3   23.40    5.30
   4  -4  -3   23.30    4.20
   4  -4  -3   18.10    5.80
  -4   4   3   23.70    5.00
  -4   4   3   26.30    5.80
  -4   4   3   19.70    4.40
  -4   4   3   18.20    4.90
  -4   4   3   20.30    4.90
   3  -4  -3   -0.50    3.60
   3  -4  -3    2.80    3.00
   3  -4  -3    2.80    1.90
  -3   4   3    3.00    2.90
  -3   4   3   -1.50    2.20
  -3   4   3    1.70    2.90
  -3   4   3    6.10    3.20
   2  -4  -3 2514.65   93.89
   2  -4  -3 2679.93   96.09
  -2   4   3 2622.34   92.49
  -2   4   3 2677.43   93.29
  -2   4   3 2648.73   92.39
  -2   4   3 2629.14   95.09
  -2   4   3 2551.24   93.79
   1  -4  -3   54.69    6.50
   1  -4  -3   33.80    4.10
  -1   4   3   39.40    4.00
  -1   4   3   36.70    5.50
  -1   4   3   41.00    4.00
  -1   4   3   45.40    3.60
   0  -4  -3   51.89    6.00
   0  -4  -3   41.00    3.50
   0   4   3   44.40    3.80
   0   4   3   51.59    3.60
   0   4   3   41.50    5.60
   1   4   3  198.48   10.90
   1   4   3  166.58    8.10
   1   4   3  187.88    8.00
   1   4   3  192.58    8.90
   1   4   3  190.58    9.20
   1   4   3  200.58    9.10
  -2  -4  -3  263.67   11.80
  -2  -4  -3  289.17   12.00
  -2  -4  -3  266.37   10.90
   2   4   3  271.47   12.60
   2   4   3  272.07   12.60
   2   4   3  273.47   11.80
   2   4   3  256.87   12.10
  -3  -4  -3 1140.49   42.10
  -3  -4  -3 1188.88   43.30
  -3  -4  -3 1053.49   42.20
  -3  -4  -3 1188.98   43.50
  -3  -4  -3 1115.79   42.30
   3   4   3 1115.29   41.90
   3   4   3 1147.69   43.50
   3   4   3 1222.58   42.10
   3   4   3 1160.88   43.90
   3   4   3 1124.09   43.50
   3   4   3 1175.78   41.90
  -4  -4  -3   22.90    3.50
  -4  -4  -3   32.40    4.30
  -4  -4  -3   29.50    5.60
  -4  -4  -3   18.40    4.30
  -4  -4  -3   24.50    5.30
  -4  -4  -3   28.10    4.70
   4   4   3   29.80    4.30
   4   4   3   28.50    4.20
   4   4   3   15.60    4.40
   4   4   3   24.30    5.00
   4   4   3   31.20    4.30
   4   4   3   35.20    6.20
  -5  -4  -3   46.00    7.00
  -5  -4  -3   47.00    7.40
  -5  -4  -3   41.00    4.90
  -5  -4  -3   39.30    5.50
  -5  -4  -3   35.90    5.90
  -5  -4  -3   50.49    5.60
   5   4   3   52.59    6.00
   5   4   3   44.40    5.30
   5   4   3   36.00    7.10
   5   4   3   44.10    6.60
  -6  -4  -3  963.30   38.60
  -6  -4  -3 1018.90   39.60
  -6  -4  -3 1074.59   41.50
  -6  -4  -3 1053.19   42.20
  -6  -4  -3 1018.30   39.30
   6   4   3 1071.99   39.20
   6   4   3  977.50   42.60
   6   4   3  999.70   40.70
   6   4   3  967.90   41.50
  -7  -4  -3   89.59   11.30
  -7  -4  -3   87.89    8.60
  -7  -4  -3   97.09   10.90
  -7  -4  -3  108.19   10.30
  -7  -4  -3   79.29    8.80
   7   4   3   90.99    7.80
   7   4   3   84.99   10.80
   7   4   3  101.29    9.50
   7   4   3   89.69    9.90
  -8  -4  -3    2.20    6.10
  -8  -4  -3   -6.90    4.90
  -8  -4  -3   -3.00    4.70
  -8  -4  -3    0.90    4.20
   8   4   3    1.80    4.30
   8   4   3    3.20    3.80
   8   4   3   -1.50    4.80
  -9  -4  -3   15.00    6.20
  -9  -4  -3   26.70    6.60
  -9  -4  -3   19.10    8.90
   9   4   3   24.20    7.00
   9   4   3   21.30    5.50
   9   4   3   24.40    8.00
 -10  -4  -3  143.99   17.30
 -10  -4  -3  121.89   13.10
 -10  -4  -3  135.09   12.70
  10   4   3  110.19   10.20
  10   4   3  118.99   13.00
 -11  -4  -3  380.86   27.10
 -11  -4  -3  422.76   23.10
 -11  -4  -3  404.46   23.30
  11   4   3  389.06   20.30
  11   4   3  359.26   24.40
  10  -5  -3   28.20   10.80
 -10   5   3   12.60    7.40
 -10   5   3   20.40    9.30
 -10   5   3   31.10   11.10
 -10   5   3   26.00    9.30
   9  -5  -3    0.60    6.80
   9  -5  -3   -0.70    6.30
  -9   5   3    2.40    5.40
  -9   5   3    5.50    7.60
  -9   5   3    7.60    6.60
  -9   5   3    1.50    7.00
   8  -5  -3   -2.50    6.70
   8  -5  -3   -1.60    5.90
  -8   5   3   -4.40    5.80
  -8   5   3    0.70    5.50
  -8   5   3  -10.70    6.20
  -8   5   3    3.70    4.90
   7  -5  -3   73.29   10.60
   7  -5  -3   77.09   11.80
  -7   5   3   81.79   11.10
  -7   5   3   80.79    9.20
  -7   5   3   78.19   10.40
  -7   5   3   89.89   12.30
   6  -5  -3   47.60    9.80
   6  -5  -3   65.59    9.30
  -6   5   3   44.00    8.80
  -6   5   3   65.59    9.50
  -6   5   3   60.49    8.90
  -6   5   3   67.59    7.60
  -6   5   3   52.69    9.00
   5  -5  -3   91.89    9.40
   5  -5  -3   91.29   10.70
  -5   5   3  101.59    8.70
  -5   5   3   77.49    9.00
  -5   5   3   74.99    8.60
  -5   5   3   93.59    9.20
  -5   5   3   96.79    7.50
   4  -5  -3    5.30    3.80
   4  -5  -3   10.10    5.50
  -4   5   3    3.70    3.00
  -4   5   3    5.90    3.70
  -4   5   3    5.80    3.80
  -4   5   3   10.10    4.40
   3  -5  -3    7.20    3.70
   3  -5  -3   10.10    5.00
  -3   5   3    7.20    3.10
  -3   5   3    7.20    3.20
  -3   5   3   10.00    2.90
  -3   5   3    4.30    3.30
   2  -5  -3  216.18   11.20
   2  -5  -3  223.88   13.80
  -2   5   3  196.88   10.90
  -2   5   3  218.38   10.60
  -2   5   3  218.98    9.70
   1  -5  -3 1549.45   59.89
   1  -5  -3 1574.64   56.39
  -1   5   3 1555.14   55.59
  -1   5   3 1528.35   56.19
  -1   5   3 1568.04   55.19
   0  -5  -3 1660.73   59.49
   0   5   3 1712.13   59.49
   0   5   3 1674.23   63.79
   0   5   3 1668.43   59.69
   1   5   3  922.11   37.70
   1   5   3  968.50   34.70
   1   5   3  902.21   35.20
   1   5   3  941.01   34.60
   2   5   3  120.69    7.70
   2   5   3  134.79    7.80
   2   5   3  109.69    6.90
   2   5   3  104.19    6.90
  -3  -5  -3 2607.94   91.79
  -3  -5  -3 2656.23   92.09
  -3  -5  -3 2560.34   90.99
   3   5   3 2568.84   93.09
   3   5   3 2501.05   91.29
   3   5   3 2642.04   91.19
   3   5   3 2575.54   93.39
   3   5   3 2517.15   92.79
  -4  -5  -3    3.80    2.70
  -4  -5  -3    2.60    2.90
  -4  -5  -3    1.30    3.10
  -4  -5  -3    7.20    3.10
   4   5   3    1.10    2.60
   4   5   3   -1.40    2.70
   4   5   3   -4.10    3.00
   4   5   3    2.70    2.30
   4   5   3   -1.00    3.30
   4   5   3    2.30    2.50
  -5  -5  -3  181.08   11.80
  -5  -5  -3  184.28   11.00
  -5  -5  -3  171.98   11.20
  -5  -5  -3  175.68   10.00
   5   5   3  188.58   10.10
   5   5   3  177.88   11.80
   5   5   3  152.08   12.10
   5   5   3  196.58   10.50
  -6  -5  -3   98.29    7.50
  -6  -5  -3   79.29    8.50
  -6  -5  -3   81.99    9.10
  -6  -5  -3   89.69    7.70
  -6  -5  -3   90.59    9.40
  -6  -5  -3   78.19    6.30
   6   5   3   78.89    8.90
   6   5   3   89.99   10.30
   6   5   3   76.59    7.60
   6   5   3   88.69    7.40
  -7  -5  -3    0.40    3.60
  -7  -5  -3    1.20    3.10
  -7  -5  -3    1.50    5.60
  -7  -5  -3   -3.70    4.60
  -7  -5  -3    3.40    4.60
  -7  -5  -3    1.00    4.00
   7   5   3   -1.60    3.30
   7   5   3   -1.50    3.30
   7   5   3   -8.10    4.10
   7   5   3   -2.30    4.00
  -8  -5  -3  241.68   14.80
  -8  -5  -3  256.57   14.70
  -8  -5  -3  249.18   18.00
   8   5   3  251.07   16.20
   8   5   3  250.47   14.10
   8   5   3  269.97   18.90
  -9  -5  -3   40.30    8.40
  -9  -5  -3   53.49   12.70
  -9  -5  -3   51.99    9.30
   9   5   3   46.40   11.40
   9   5   3   62.69    9.80
   9   5   3   52.09    7.70
 -10  -5  -3  105.99   16.10
 -10  -5  -3  111.39   11.60
 -10  -5  -3  113.09   12.30
  10   5   3  117.19   10.60
  10   5   3  111.49   12.70
 -11  -5  -3  255.77   21.80
 -11  -5  -3  225.28   17.20
 -11  -5  -3  224.48   16.70
  11   5   3  217.58   15.10
  11   5   3  245.78   19.00
   9  -6  -3   19.60    8.80
   9  -6  -3    1.50    8.40
  -9   6   3   19.40    7.20
  -9   6   3   23.10    8.60
  -9   6   3   16.20    9.90
  -9   6   3   14.10    9.10
   8  -6  -3    2.70    6.20
   8  -6  -3    2.90    7.30
  -8   6   3   -2.00    7.30
  -8   6   3    5.60    6.30
  -8   6   3   -1.20    5.40
  -8   6   3    1.50    5.40
   7  -6  -3    1.10    6.70
   7  -6  -3   -1.50    4.90
  -7   6   3    0.50    6.20
  -7   6   3   -3.00    4.00
  -7   6   3   -3.00    4.80
  -7   6   3   -3.50    5.40
   6  -6  -3  146.09   14.70
   6  -6  -3  151.88   13.30
  -6   6   3  139.49   12.40
  -6   6   3  129.89   11.50
  -6   6   3  140.49   11.90
  -6   6   3  133.19    9.90
  -6   6   3  136.39   13.70
   5  -6  -3   74.19    9.30
   5  -6  -3   43.20   10.00
  -5   6   3   69.29    8.80
  -5   6   3   54.79    7.50
  -5   6   3   57.39    9.50
  -5   6   3   68.59    8.30
   4  -6  -3  455.65   24.20
   4  -6  -3  428.16   21.50
  -4   6   3  448.76   19.70
  -4   6   3  439.66   19.90
  -4   6   3  456.95   20.80
  -4   6   3  454.15   21.90
   3  -6  -3  894.41   38.30
   3  -6  -3  871.21   34.90
  -3   6   3  883.61   33.70
  -3   6   3  848.32   32.30
  -3   6   3  806.12   34.50
  -3   6   3  857.71   32.70
   2  -6  -3  528.05   25.40
   2  -6  -3  507.65   21.60
  -2   6   3  524.15   20.60
  -2   6   3  519.55   19.90
  -2   6   3  482.65   21.30
   1  -6  -3  434.16   18.10
   1  -6  -3  452.25   22.50
  -1   6   3  446.76   18.00
   0  -6  -3  461.75   17.30
   1   6   3   55.29    4.80
   1   6   3   58.89    5.00
   2   6   3   80.29    5.90
   2   6   3   81.79    6.60
   2   6   3   69.79    6.40
   2   6   3   88.19    6.30
  -3  -6  -3 1387.36   51.09
  -3  -6  -3 1462.55   52.19
   3   6   3 1419.26   52.39
   3   6   3 1403.06   53.79
   3   6   3 1541.15   54.49
   3   6   3 1459.45   54.59
  -4  -6  -3   77.29    6.70
  -4  -6  -3   65.79    5.50
   4   6   3   73.39    5.20
   4   6   3   54.69    7.00
   4   6   3   64.29    5.40
   4   6   3   74.79    6.00
   4   6   3   71.69    8.00
  -5  -6  -3  377.66   17.40
  -5  -6  -3  400.56   17.30
  -5  -6  -3  400.06   19.10
  -5  -6  -3  381.26   17.90
   5   6   3  405.06   17.70
   5   6   3  422.26   17.80
   5   6   3  414.36   21.00
   5   6   3  416.76   20.10
  -6  -6  -3  104.79    8.10
  -6  -6  -3   87.89    9.60
  -6  -6  -3   86.09    8.40
  -6  -6  -3   98.29    9.00
   6   6   3  113.39    8.30
   6   6   3   83.69    9.40
   6   6   3  108.99   11.50
   6   6   3   91.59    7.90
  -7  -6  -3  191.18   13.80
  -7  -6  -3  185.58   13.10
  -7  -6  -3  178.28   11.70
   7   6   3  213.88   16.10
   7   6   3  187.38   11.60
   7   6   3  210.28   12.90
  -8  -6  -3  125.69   12.30
  -8  -6  -3  110.79    9.90
   8   6   3  108.59    9.70
   8   6   3  109.39   10.60
   8   6   3  123.99   14.10
  -9  -6  -3  237.28   14.60
  -9  -6  -3  241.98   17.90
  -9  -6  -3  213.08   13.90
   9   6   3  217.28   15.90
   9   6   3  244.78   14.40
   9   6   3  179.68   17.80
 -10  -6  -3   42.70    9.40
 -10  -6  -3   61.49   12.90
 -10  -6  -3   38.90   12.00
  10   6   3   31.00    8.10
  10   6   3   38.70    8.20
  10   6   3   51.49   11.60
 -11  -6  -3   17.20    9.30
 -11  -6  -3    5.00    6.10
  11   6   3   -1.20    5.00
  11   6   3   -2.70    6.20
   9  -7  -3   99.79   15.20
   9  -7  -3  114.09   17.20
  -9   7   3   99.89   16.90
  -9   7   3  108.79   15.00
   8  -7  -3   12.00    7.40
   8  -7  -3   -3.10    8.10
  -8   7   3    3.40    6.40
  -8   7   3    6.90    8.50
   7  -7  -3   10.10    8.30
   7  -7  -3   41.60    9.30
  -7   7   3   37.20    9.70
  -7   7   3   20.90    5.80
  -7   7   3   15.60    6.70
   6  -7  -3    2.10    5.00
   6  -7  -3    7.50    7.70
  -6   7   3    4.80    7.00
  -6   7   3   10.80    5.40
  -6   7   3   11.50    6.10
  -6   7   3    8.40    5.10
  -6   7   3   -1.30    3.60
   5  -7  -3   11.90    5.50
   5  -7  -3   37.70    9.60
  -5   7   3   14.50    7.20
  -5   7   3   37.90    7.20
  -5   7   3   16.60    5.80
  -5   7   3   28.50    6.80
   4  -7  -3  286.67   19.60
   4  -7  -3  303.57   16.50
  -4   7   3  287.07   16.30
  -4   7   3  301.47   15.60
  -4   7   3  293.57   14.30
  -4   7   3  251.47   13.80
   3  -7  -3  170.38   11.20
   3  -7  -3  192.18   15.00
  -3   7   3  180.78    8.80
  -3   7   3  171.68    9.40
  -3   7   3  198.58   10.70
  -3   7   3  179.28   11.30
   2  -7  -3  134.69    9.00
   2  -7  -3  157.68   13.20
  -2   7   3  152.38    7.60
  -2   7   3  149.09    9.10
  -2   7   3  158.78    8.30
   1  -7  -3   95.49    6.00
   1  -7  -3   78.59    9.80
  -1   7   3   87.49    5.80
   1   7   3   74.09    5.60
   1   7   3   80.09    5.80
   2   7   3   20.80    3.90
   2   7   3   14.80    3.70
   2   7   3   13.10    3.50
   3   7   3  334.97   16.50
   3   7   3  333.47   14.80
   3   7   3  349.77   16.20
   3   7   3  349.17   16.90
  -4  -7  -3  109.99    6.20
   4   7   3  124.99    7.70
   4   7   3  103.49    9.20
   4   7   3  100.39    6.90
   4   7   3  120.69   10.00
  -5  -7  -3   62.29    6.30
   5   7   3   68.09    8.60
   5   7   3   59.29    6.60
   5   7   3   82.69    9.70
   5   7   3   73.69    5.90
   5   7   3   76.89    8.80
  -6  -7  -3  117.99    8.50
  -6  -7  -3   91.59    8.50
  -6  -7  -3  103.09    7.10
  -6  -7  -3   92.99    9.80
   6   7   3  118.49   11.10
   6   7   3  120.39   12.10
   6   7   3  103.99    8.30
   6   7   3  118.79    8.80
  -7  -7  -3   18.00    5.00
  -7  -7  -3   18.50    5.40
  -7  -7  -3   24.80    6.20
   7   7   3   17.40    5.10
   7   7   3   20.60    7.70
   7   7   3   23.40    5.60
  -8  -7  -3   52.89    9.40
  -8  -7  -3   42.50    7.70
   8   7   3   26.50    6.10
   8   7   3   23.50    8.30
   8   7   3   46.10    8.20
  -9  -7  -3    6.10    6.60
   9   7   3   -0.70    4.40
   9   7   3    1.00    5.30
   9   7   3    2.00    7.10
 -10  -7  -3   32.50    9.10
  10   7   3   38.20   10.70
  10   7   3   22.30    6.50
   8  -8  -3  178.48   20.50
   8  -8  -3  184.48   17.20
  -8   8   3  198.48   20.00
  -8   8   3  159.28   15.90
   7  -8  -3  164.38   18.70
   7  -8  -3  172.28   15.80
  -7   8   3  175.58   18.00
  -7   8   3  159.98   14.30
   6  -8  -3  136.29   13.20
   6  -8  -3  120.99   16.20
  -6   8   3  135.19   12.00
  -6   8   3  134.39   17.10
  -6   8   3  137.59   15.60
   5  -8  -3   82.89   10.40
   5  -8  -3   69.59   13.00
  -5   8   3   55.09   11.70
  -5   8   3   59.89    8.30
  -5   8   3   53.09    9.40
   4  -8  -3   54.49   11.50
   4  -8  -3   51.39    8.10
  -4   8   3   60.19    8.30
  -4   8   3   56.89    6.80
  -4   8   3   50.29    8.30
   3  -8  -3   68.99    7.50
   3  -8  -3   80.69   12.20
  -3   8   3   68.89    6.10
  -3   8   3   67.19    7.50
  -3   8   3   67.99    7.40
   2  -8  -3    7.30    6.10
   2  -8  -3    2.50    3.30
  -2   8   3    5.30    3.40
   1  -8  -3   98.39   11.60
   1  -8  -3   87.69    5.90
   1   8   3    3.20    2.70
   1   8   3    1.60    2.50
   2   8   3   -1.70    2.80
   2   8   3   -1.70    3.00
   2   8   3    0.90    2.80
   3   8   3   98.29    8.80
   3   8   3  126.09    9.60
   4   8   3  297.17   13.90
   4   8   3  323.27   17.20
   4   8   3  277.17   16.10
  -5  -8  -3  114.79    7.10
   5   8   3  131.49   11.30
   5   8   3  129.29    8.90
   5   8   3  140.09   12.20
   6   8   3   23.30    7.20
   6   8   3   21.80    4.80
   6   8   3   25.70    5.50
   7   8   3   19.20    7.40
   7   8   3    7.50    4.60
   7   8   3    5.00    5.20
  -8  -8  -3  164.78   10.20
   8   8   3  157.78   12.10
   8   8   3  142.19   16.00
  -9  -8  -3  449.95   21.60
   9   8   3  420.06   22.10
   9   8   3  478.35   29.00
 -10  -8  -3   79.19   12.70
  10   8   3   55.69    9.60
  10   8   3   80.19   16.00
   7  -9  -3    8.10    9.40
   7  -9  -3   -5.40    6.70
  -7   9   3    4.60    6.40
  -7   9   3   25.20   10.40
   6  -9  -3    8.20    9.80
   6  -9  -3   -8.20    5.30
  -6   9   3   -1.80    7.10
  -6   9   3   -4.80    4.60
   5  -9  -3   28.60    7.70
   5  -9  -3   20.60    9.90
  -5   9   3   47.20    9.40
  -5   9   3   28.50    6.30
  -5   9   3   39.50    9.60
   4  -9  -3   97.49   10.80
   4  -9  -3   92.59   14.30
  -4   9   3   96.09   13.10
  -4   9   3  129.29   10.50
  -4   9   3  124.49    8.90
   3  -9  -3  288.37   21.50
   3  -9  -3  291.27   15.60
  -3   9   3  291.57   13.60
  -3   9   3  305.97   14.70
   2  -9  -3  249.58   18.90
   2  -9  -3  224.48   12.10
  -2   9   3  243.18   12.70
   1   9   3  458.55   19.20
   1   9   3  442.86   18.90
   2   9   3    4.90    3.40
   2   9   3    3.80    3.50
   2   9   3    4.10    3.60
   3   9   3   71.69    8.40
   3   9   3   64.39    8.30
   4   9   3   95.09    9.60
   4   9   3   93.39   10.40
   5   9   3   93.39   11.50
   5   9   3  103.79   12.10
   5   9   3   89.69    8.00
   6   9   3  171.98   11.70
   6   9   3  215.68   16.40
   7   9   3   66.19    8.60
   7   9   3   76.39   12.80
   8   9   3   29.10   10.00
   8   9   3   46.30    8.60
   9   9   3   95.79   10.70
   9   9   3  103.89   16.20
   6 -10  -3  121.59   18.60
  -6  10   3   90.69   16.50
  -6  10   3  104.19   11.50
   5 -10  -3   33.10   11.60
  -5  10   3   58.19   10.00
  -5  10   3   48.10    8.20
  -5  10   3   58.59   13.30
   4 -10  -3  140.29   17.50
  -4  10   3  143.49   10.00
  -4  10   3  144.39   11.40
  -4  10   3  147.89   15.60
   3 -10  -3  414.36   27.70
  -3  10   3  454.55   25.20
  -3  10   3  449.95   18.80
   2 -10  -3  189.98   18.10
   2  10   3   10.30    4.30
   2  10   3    6.80    4.10
   3  10   3  155.28   11.20
   3  10   3  147.09   11.70
   4  10   3   60.09    9.10
   4  10   3   77.49   10.20
   5  10   3  235.58   16.90
   6  10   3  279.07   19.70
   7  10   3    7.70    5.10
   7  10   3    7.20    7.40
   8  10   3    8.60    5.90
   8  10   3   15.90    9.10
   5 -11  -3   46.60   13.70
  -5  11   3   55.89    9.10
  -5  11   3   92.69   14.90
   4 -11  -3   74.69   15.70
  -4  11   3   55.99    9.00
  -4  11   3   39.20   10.60
  -4  11   3   39.00    7.10
   3 -11  -3  121.29   17.10
  -3  11   3   99.49   13.30
  -2  11   3  120.39   13.80
  -1  11   3  104.69   11.90
   1  11   3   32.20    6.10
   2  11   3  163.08   11.60
   2  11   3  174.18   11.60
   3  11   3  162.98   12.30
   3  11   3  161.28   12.70
   4  11   3    2.80    5.40
   5  11   3    4.50    6.30
   6  11   3   10.50    7.80
   7  11   3   42.50   10.70
  -3  12   3   -1.10    7.80
  -2  12   3    2.90    6.70
  -1  12   3   -3.00    5.50
   2  12   3    7.10    4.90
   2  12   3    6.60    4.90
   3  12   3   16.10    5.90
   4  12   3   27.00    8.20
   5  12   3   90.99   13.20
   2  13   3   79.69    9.60
   0  12  -4   53.49    8.60
   4  11  -4   73.49   13.00
   3  11  -4   96.39   12.80
   2  11  -4   51.59    9.50
   1  11  -4  204.58   13.90
   1  11  -4  199.68   12.40
   0  11  -4  446.96   20.50
   0  11  -4  420.26   19.20
   3 -11   4   98.49   15.10
  -4  11  -4  164.18   15.90
   4 -11   4  131.29   17.70
   6  10  -4  149.39   17.10
   5  10  -4   50.19   12.40
   4  10  -4   45.40   11.20
   3  10  -4   91.99   11.80
   2  10  -4   14.70    5.90
   2  10  -4    9.80    5.10
   1  10  -4   19.60    5.60
   1  10  -4   21.00    5.10
   0  10  -4    7.80    4.00
   0  10  -4   17.70    4.90
  -2  10  -4    4.90    5.60
  -3  10  -4   12.00    6.50
   3 -10   4   12.10    7.90
  -4  10  -4   12.90    7.80
  -4  10  -4   22.10    5.50
  -4  10  -4   17.40    5.70
   4 -10   4   18.70    9.40
  -5  10  -4   26.00    6.50
  -5  10  -4   35.00    8.70
  -5  10  -4   31.90    9.50
   5 -10   4   46.90   12.20
  -6  10  -4    9.80    8.80
  -6  10  -4   10.50    6.50
   6 -10   4   20.10   10.80
   7   9  -4  123.79   16.30
   7   9  -4  105.49   10.60
   6   9  -4    4.10    4.60
   6   9  -4    1.40    7.10
   5   9  -4   29.30    8.60
   4   9  -4    3.60    5.90
   3   9  -4    9.70    5.80
   3   9  -4    7.40    5.00
   2   9  -4   61.69    9.20
   2   9  -4   75.59    8.20
   1   9  -4   64.89    8.10
   1   9  -4   60.39    7.00
   0   9  -4  129.99    9.10
   0   9  -4  134.59    8.40
   0   9  -4  121.69    9.30
  -1   9  -4    3.20    3.00
  -1   9  -4    5.50    4.30
  -2   9  -4    3.90    4.60
   2  -9   4    0.40    6.20
  -3   9  -4   94.99    7.90
  -3   9  -4  110.19   11.40
  -3   9  -4   91.89    8.20
   3  -9   4  104.09   13.20
  -4   9  -4  107.79   13.00
  -4   9  -4  103.79    9.20
  -4   9  -4  109.19    9.40
   4  -9   4  120.19   14.70
  -5   9  -4   10.00    5.50
  -5   9  -4   11.40    5.60
  -5   9  -4    5.70    7.60
   5  -9   4   13.00    9.20
  -6   9  -4   77.79   14.20
  -6   9  -4   89.79   11.40
   6  -9   4   89.29   15.50
  -7   9  -4   35.50    8.80
  -7   9  -4   20.00    9.80
   7  -9   4   33.90   11.90
   8   8  -4    2.50    4.90
   8   8  -4    9.40    8.70
   7   8  -4   68.69   13.80
   7   8  -4   59.99    8.60
   6   8  -4    1.10    6.90
   6   8  -4    3.20    4.10
   5   8  -4  127.89    9.30
   5   8  -4  132.49   13.70
   5   8  -4   98.59    9.80
   4   8  -4    5.30    4.80
   4   8  -4    1.00    3.30
   4   8  -4   -2.30    5.00
   4   8  -4   -0.80    3.50
   3   8  -4   41.80    6.20
   3   8  -4   57.49    7.90
   3   8  -4   54.39    9.30
   2   8  -4   35.60    5.40
   2   8  -4   35.00    6.50
   2   8  -4   38.70    7.80
   1   8  -4   19.20    3.80
   1   8  -4   26.40    4.60
   1   8  -4   22.30    5.40
   1   8  -4   18.70    4.80
   0   8  -4   70.29    6.20
   0   8  -4   76.69    6.60
   0   8  -4   67.19    6.30
   0   8  -4   61.89    6.90
  -1   8  -4   13.70    3.40
  -1   8  -4   12.00    3.70
  -1   8  -4    8.00    4.10
  -1   8  -4   17.40    4.40
  -2   8  -4   11.50    4.40
  -2   8  -4    5.70    3.50
  -2   8  -4    6.10    4.50
   2  -8   4   12.50    6.10
  -3   8  -4  192.48   13.20
  -3   8  -4  170.78   10.40
  -3   8  -4  173.98   12.40
  -3   8  -4  178.28   10.10
   3  -8   4  171.88   14.90
  -4   8  -4  246.38   13.40
  -4   8  -4  257.37   13.70
  -4   8  -4  218.48   16.20
   4  -8   4  230.58   17.90
  -5   8  -4  351.66   18.20
  -5   8  -4  332.87   20.60
  -5   8  -4  329.37   17.90
   5  -8   4  364.16   22.80
  -6   8  -4  260.17   17.60
  -6   8  -4  237.88   18.80
  -6   8  -4  248.78   16.20
   6  -8   4  230.58   19.70
  -7   8  -4  141.49   16.70
  -7   8  -4  116.19   13.60
   7  -8   4  123.49   16.30
  -8   8  -4  203.08   19.40
  -8   8  -4  183.38   17.00
   8  -8   4  152.98   18.60
   9   7  -4   23.00    6.30
   9   7  -4   44.40   12.40
  -9  -7   4   45.20    9.20
   8   7  -4  171.78   14.20
   8   7  -4  169.28   18.40
   8   7  -4  151.78   11.60
  -8  -7   4  147.89   10.80
   7   7  -4   56.09    9.00
   7   7  -4   49.00   11.00
   7   7  -4   32.00    7.50
  -7  -7   4   56.09    6.00
   6   7  -4  396.26   20.70
   6   7  -4  401.46   24.30
   6   7  -4  395.06   18.80
   5   7  -4  312.17   19.90
   5   7  -4  305.27   15.20
   5   7  -4  318.07   17.10
   4   7  -4   38.70    7.50
   4   7  -4   38.90    5.80
   4   7  -4   48.10    9.50
   4   7  -4   42.00    6.60
   3   7  -4  899.71   36.60
   3   7  -4  844.22   33.90
   3   7  -4  852.01   35.00
   3   7  -4  825.22   36.50
   2   7  -4  308.67   16.20
   2   7  -4  306.87   14.50
   2   7  -4  290.87   15.60
   2   7  -4  288.67   14.80
   1   7  -4   74.39    6.60
   1   7  -4   67.39    7.20
   1   7  -4   68.39    5.60
   1   7  -4   71.19    7.50
   0   7  -4    2.90    3.00
   0   7  -4    3.00    2.70
   0   7  -4    8.70    3.10
   0   7  -4    9.70    4.20
   0   7  -4    4.00    2.70
  -1   7  -4  161.98    8.80
  -1   7  -4  138.59    9.30
  -1   7  -4  155.38    9.90
  -1   7  -4  156.38    8.20
   1  -7   4  155.68   11.50
  -2   7  -4   97.09    7.20
  -2   7  -4   90.29    8.10
  -2   7  -4  103.29    8.90
  -2   7  -4  106.89    6.70
   2  -7   4   91.39   10.10
  -3   7  -4  613.34   25.60
  -3   7  -4  623.74   28.00
  -3   7  -4  657.03   25.40
  -3   7  -4  628.44   28.10
   3  -7   4  651.03   30.00
  -4   7  -4  125.69   11.50
  -4   7  -4  110.89    9.10
  -4   7  -4  115.69   11.10
  -4   7  -4  131.09    9.30
   4  -7   4   99.09   11.90
  -5   7  -4   89.59   11.90
  -5   7  -4   86.09    9.60
  -5   7  -4   94.39    9.40
   5  -7   4  106.69   12.60
  -6   7  -4   11.20    5.70
  -6   7  -4   11.90    7.40
  -6   7  -4   13.90    5.80
   6  -7   4   19.90    8.50
  -7   7  -4  117.69   14.90
  -7   7  -4  135.99   13.20
   7  -7   4  125.19   13.60
   7  -7   4  123.99   15.20
  -8   7  -4   43.40   11.20
  -8   7  -4   30.70    9.10
   8  -7   4   35.20   10.60
   8  -7   4   32.70    8.90
  -9   7  -4   20.00   10.40
  -9   7  -4   14.40    8.60
   9  -7   4   11.60    9.20
   9  -7   4   17.90   10.40
   9   6  -4  208.58   16.80
   9   6  -4  207.78   14.00
   9   6  -4  223.98   21.20
  -9  -6   4  207.28   16.10
   8   6  -4  103.49    9.70
   8   6  -4   89.79   11.20
   8   6  -4  113.69   15.50
  -8  -6   4  117.59   11.30
   7   6  -4  347.97   22.60
   7   6  -4  290.37   18.50
   7   6  -4  327.07   16.60
  -7  -6   4  319.37   17.00
   6   6  -4   98.89   12.90
   6   6  -4   97.59   10.00
   6   6  -4  105.09    8.80
  -6  -6   4   99.09    8.10
   5   6  -4    0.10    4.20
   5   6  -4    7.30    3.70
   5   6  -4    8.30    5.80
   5   6  -4    5.70    4.10
  -5  -6   4    1.40    3.70
   4   6  -4  631.44   29.20
   4   6  -4  697.23   29.00
   4   6  -4  699.63   31.30
   4   6  -4  688.03   26.90
   3   6  -4  283.67   12.70
   3   6  -4  288.47   16.40
   3   6  -4  288.87   14.60
   3   6  -4  287.67   15.00
   2   6  -4  710.13   28.30
   2   6  -4  702.23   28.40
   2   6  -4  670.33   28.10
   2   6  -4  689.03   28.40
   2   6  -4  736.33   29.80
   1   6  -4   54.29    4.90
   1   6  -4   51.69    5.60
   1   6  -4   52.29    6.00
   1   6  -4   44.30    6.00
   0   6  -4   -1.40    2.20
   0   6  -4   -1.30    2.30
   0   6  -4   -0.20    2.50
   0   6  -4    0.70    2.90
  -1   6  -4   43.10    4.90
  -1   6  -4   63.29    5.90
  -1   6  -4   57.09    6.00
  -1   6  -4   61.49    4.80
  -1   6  -4   55.59    5.70
   1  -6   4   59.39    7.00
  -2   6  -4   19.30    4.50
  -2   6  -4   22.50    5.30
  -2   6  -4   15.70    3.80
  -2   6  -4   20.40    3.80
   2  -6   4   14.90    5.20
  -3   6  -4  139.69    8.40
  -3   6  -4  130.09    8.40
  -3   6  -4  139.39   10.50
  -3   6  -4  128.29    9.90
   3  -6   4  122.69   11.10
  -4   6  -4    7.70    4.10
  -4   6  -4    6.20    5.10
  -4   6  -4    4.60    3.80
  -4   6  -4    7.90    4.70
   4  -6   4    9.00    5.80
  -5   6  -4   62.29    8.30
  -5   6  -4   36.10    7.60
  -5   6  -4   76.49   10.20
   5  -6   4   65.69   10.20
  -6   6  -4    3.90    4.50
  -6   6  -4   23.90    7.70
  -6   6  -4   23.10    6.40
  -6   6  -4   19.70    6.20
   6  -6   4   17.60    6.50
   6  -6   4   14.50    7.50
  -7   6  -4   16.50    8.10
  -7   6  -4   17.60    6.90
  -7   6  -4   23.00    5.60
  -7   6  -4   14.50    7.00
   7  -6   4   25.20    8.40
   7  -6   4   19.00    7.60
  -8   6  -4    5.30    7.70
  -8   6  -4    0.40    6.30
  -8   6  -4   -2.50    4.90
   8  -6   4   -3.00    6.40
   8  -6   4    8.40    7.60
  -9   6  -4    0.30    8.60
  -9   6  -4    5.20    8.10
   9  -6   4    0.50    7.90
   9  -6   4    6.50    7.60
  10   5  -4    1.30    6.70
  10   5  -4    0.50    4.70
 -10  -5   4   10.20    8.00
 -10  -5   4    5.20    5.50
   9   5  -4   95.89   14.80
   9   5  -4   69.09   11.40
   9   5  -4   61.99    8.60
  -9  -5   4   57.09   11.60
  -9  -5   4   69.29    9.40
   8   5  -4    1.90    4.30
   8   5  -4   10.20    5.70
   8   5  -4   12.50    7.70
  -8  -5   4    5.90    5.80
  -8  -5   4    4.90    4.40
   7   5  -4    2.30    4.60
   7   5  -4    9.70    7.10
   7   5  -4    0.20    3.90
  -7  -5   4    5.50    3.50
  -7  -5   4   10.50    5.60
   6   5  -4   17.20    5.90
   6   5  -4   20.70    4.70
   6   5  -4   16.60    6.80
   6   5  -4   22.10    7.40
  -6  -5   4   14.40    4.90
  -6  -5   4   26.60    7.40
   5   5  -4   -9.00    3.20
   5   5  -4    5.70    3.40
   5   5  -4    0.50    4.00
   5   5  -4    3.20    5.10
  -5  -5   4   -1.20    3.60
  -5  -5   4    3.00    3.30
   4   5  -4  157.98    8.60
   4   5  -4  132.79   11.70
   4   5  -4  132.29    9.80
   4   5  -4  132.79   10.20
  -4  -5   4  138.39    7.80
  -4  -5   4  146.29    9.80
   3   5  -4   44.00    5.80
   3   5  -4   37.40    7.00
   3   5  -4   50.79    4.80
   3   5  -4   45.00    6.10
  -3  -5   4   41.80    5.30
   2   5  -4    3.20    3.00
   2   5  -4    8.10    3.10
   2   5  -4    5.90    3.20
   2   5  -4    1.90    3.50
   2   5  -4    7.30    3.20
   1   5  -4  142.39    8.50
   1   5  -4  156.58    8.00
   1   5  -4  140.79    6.70
   1   5  -4  153.08    8.60
   1   5  -4  156.68    9.40
   0   5  -4   26.80    4.30
   0   5  -4   26.80    3.70
   0   5  -4   25.30    4.50
   0   5  -4   22.50    3.80
  -1   5  -4  290.57   12.20
  -1   5  -4  266.37   13.00
  -1   5  -4  277.47   13.60
  -1   5  -4  298.77   12.80
  -1   5  -4  289.07   13.20
   1  -5   4  284.47   14.10
  -2   5  -4  243.48   11.80
  -2   5  -4  268.47   11.50
  -2   5  -4  262.17   13.50
  -2   5  -4  248.28   12.90
   2  -5   4  255.07   13.80
  -3   5  -4  152.28   10.60
  -3   5  -4  148.59   10.40
  -3   5  -4  173.38    9.20
  -3   5  -4  152.78    9.00
   3  -5   4  154.98   10.90
  -4   5  -4   67.39    8.10
  -4   5  -4   64.89    7.00
  -4   5  -4   64.19    7.10
  -4   5  -4   68.49    8.70
   4  -5   4   55.99    7.90
  -5   5  -4    6.00    4.20
  -5   5  -4    7.00    4.30
  -5   5  -4   10.80    5.80
   5  -5   4   12.40    5.50
   5  -5   4   16.10    5.30
  -6   5  -4  140.69   13.10
  -6   5  -4  150.58   12.10
  -6   5  -4  136.69   11.70
  -6   5  -4  144.09   11.40
  -6   5  -4  158.08    9.70
   6  -5   4  145.19   12.90
   6  -5   4  150.68   12.90
  -7   5  -4    7.40    5.60
  -7   5  -4   -5.10    5.80
  -7   5  -4    2.00    4.40
  -7   5  -4    9.60    6.10
  -7   5  -4    9.80    6.30
   7  -5   4    2.50    6.10
   7  -5   4   -2.20    5.00
  -8   5  -4   38.60    8.60
  -8   5  -4   52.89   10.70
  -8   5  -4   41.40    9.30
  -8   5  -4   47.20   11.00
   8  -5   4   25.30    8.40
   8  -5   4   35.20    8.60
  -9   5  -4  201.58   15.90
  -9   5  -4  220.18   18.70
  -9   5  -4  280.27   20.00
  -9   5  -4  268.87   20.60
   9  -5   4  239.68   19.60
   9  -5   4  263.97   19.70
 -10   5  -4   39.80   11.40
 -10   5  -4   36.30    8.80
 -10   5  -4   41.00   10.90
  10  -5   4   27.80   10.60
  10   4  -4   23.70    6.00
  10   4  -4   49.99   10.60
 -10  -4   4   24.90    7.50
 -10  -4   4   25.90    9.20
   9   4  -4    4.10    4.50
   9   4  -4   -0.50    5.20
   9   4  -4    1.70    7.40
  -9  -4   4    5.00    5.10
  -9  -4   4    7.20    7.20
  -9  -4   4    2.30    5.70
   8   4  -4    7.50    4.40
   8   4  -4   15.80    6.20
   8   4  -4   24.20    8.20
  -8  -4   4    9.00    5.00
  -8  -4   4   13.80    4.50
  -8  -4   4   11.40    6.80
   7   4  -4    7.00    6.60
   7   4  -4    4.50    3.80
   7   4  -4    2.70    5.00
  -7  -4   4    6.20    5.40
  -7  -4   4    4.00    3.30
  -7  -4   4    6.30    4.30
   6   4  -4  357.96   21.20
   6   4  -4  338.27   19.10
   6   4  -4  331.87   19.00
   6   4  -4  344.07   16.20
  -6  -4   4  393.86   22.80
  -6  -4   4  363.16   18.80
  -6  -4   4  328.37   15.00
  -6  -4   4  342.47   16.50
  -6  -4   4  338.27   15.50
  -6  -4   4  338.97   19.00
   5   4  -4  329.87   17.00
   5   4  -4  315.97   18.50
   5   4  -4  282.87   16.50
   5   4  -4  310.77   14.40
  -5  -4   4  271.47   16.20
  -5  -4   4  297.27   15.80
  -5  -4   4  327.57   13.10
   4   4  -4   39.60    6.10
   4   4  -4   24.70    5.60
   4   4  -4   33.80    4.90
   4   4  -4   32.10    7.40
  -4  -4   4   45.80    6.20
  -4  -4   4   44.30    5.70
   3   4  -4  450.85   21.90
   3   4  -4  509.75   21.10
   3   4  -4  430.36   21.00
   3   4  -4  478.05   18.80
   3   4  -4  487.35   20.80
  -3  -4   4  481.95   20.30
  -3  -4   4  448.06   18.80
   2   4  -4  753.22   27.80
   2   4  -4  749.23   29.80
   2   4  -4  735.33   29.70
   2   4  -4  764.92   30.90
   2   4  -4  736.43   29.70
   2   4  -4  733.23   28.60
  -2  -4   4  783.42   28.90
   1   4  -4  507.95   19.30
   1   4  -4  535.35   20.80
   1   4  -4  527.85   22.00
   1   4  -4  524.05   20.50
   1   4  -4  540.95   21.20
  -1  -4   4  504.15   19.30
   0   4  -4  101.79    6.10
   0   4  -4  115.69    7.10
   0   4  -4   89.29    5.70
   0   4  -4  123.59    6.60
   0  -4   4   90.99    6.00
  -1   4  -4  380.06   15.40
  -1   4  -4  398.26   16.00
  -1   4  -4  391.86   17.00
  -1   4  -4  361.16   16.00
   1  -4   4  385.66   16.60
   1  -4   4  373.66   16.40
  -2   4  -4   98.79    7.10
  -2   4  -4   89.19    6.00
  -2   4  -4   81.39    5.80
  -2   4  -4   81.59    6.20
  -2   4  -4   86.69    7.10
   2  -4   4   95.79    7.30
  -3   4  -4 2267.47   85.79
  -3   4  -4 2350.06   86.59
  -3   4  -4 2414.16   84.69
  -3   4  -4 2342.17   84.79
   3  -4   4 2423.16   86.19
  -4   4  -4  267.67   15.00
  -4   4  -4  304.57   15.80
  -4   4  -4  286.17   14.20
  -4   4  -4  248.88   13.70
   4  -4   4  278.07   15.20
   4  -4   4  273.17   14.70
  -5   4  -4   74.99    8.10
  -5   4  -4   93.39    9.60
  -5   4  -4   80.59    9.00
  -5   4  -4   87.99    8.50
  -5   4  -4   92.89    8.10
  -5   4  -4   67.99    6.20
   5  -4   4   85.29    9.20
   5  -4   4   89.49    8.80
  -6   4  -4    1.40    4.20
  -6   4  -4    7.10    5.00
  -6   4  -4   -0.60    4.90
  -6   4  -4    4.70    4.60
  -6   4  -4   -1.40    3.20
   6  -4   4   -3.50    4.30
   6  -4   4   -1.70    4.00
  -7   4  -4  376.96   21.80
  -7   4  -4  428.16   19.60
  -7   4  -4  420.86   22.30
  -7   4  -4  408.96   22.80
  -7   4  -4  382.76   21.70
   7  -4   4  409.66   22.10
   7  -4   4  397.06   22.60
  -8   4  -4  244.08   17.90
  -8   4  -4  255.57   18.10
  -8   4  -4  256.67   15.70
  -8   4  -4  256.47   18.60
   8  -4   4  269.97   18.60
   8  -4   4  253.37   17.70
  -9   4  -4   21.70    9.10
  -9   4  -4   29.50    8.70
  -9   4  -4   32.00    9.90
  -9   4  -4   26.20    7.20
   9  -4   4   45.00   10.20
   9  -4   4   23.30    8.70
 -10   4  -4   74.59   11.80
 -10   4  -4   68.79   14.70
 -10   4  -4   66.59   14.80
 -10   4  -4   57.69   12.70
  10  -4   4   57.19   12.70
  10  -4   4   57.59   12.20
 -11   4  -4   15.80    8.10
 -11   4  -4   35.80   11.90
 -11   4  -4    4.80    8.80
  11   3  -4   44.50    8.50
 -11  -3   4   54.19   11.20
  10   3  -4   -0.30    4.30
  10   3  -4   -1.00    5.70
 -10  -3   4   -1.10    5.40
 -10  -3   4   -5.90    6.50
 -10  -3   4   -1.30    5.10
   9   3  -4  236.68   18.10
   9   3  -4  222.88   13.50
  -9  -3   4  225.08   14.70
  -9  -3   4  225.78   18.70
  -9  -3   4  208.78   15.30
   8   3  -4  302.97   18.90
   8   3  -4  295.67   20.90
   8   3  -4  287.17   15.00
  -8  -3   4  275.87   19.00
  -8  -3   4  229.98   16.00
  -8  -3   4  296.57   15.60
   7   3  -4   29.30    5.80
   7   3  -4   29.50    8.10
   7   3  -4   22.70    6.40
   7   3  -4   31.80    7.60
  -7  -3   4   52.59    9.60
  -7  -3   4   26.60    6.20
  -7  -3   4   38.10    6.50
  -7  -3   4   36.80    8.60
   6   3  -4  469.65   22.50
   6   3  -4  428.96   22.30
   6   3  -4  412.66   23.40
   6   3  -4  403.46   18.80
  -6  -3   4  458.45   22.40
  -6  -3   4  418.16   21.90
  -6  -3   4  409.36   18.80
  -6  -3   4  455.35   20.40
   5   3  -4  818.02   36.00
   5   3  -4  817.42   31.70
   5   3  -4  806.42   34.50
   5   3  -4  824.72   34.50
  -5  -3   4  783.32   34.30
  -5  -3   4  827.02   31.40
  -5  -3   4  792.42   34.10
  -5  -3   4  869.11   31.50
  -5  -3   4  785.92   32.40
   4   3  -4  336.67   18.50
   4   3  -4  343.87   17.20
   4   3  -4  341.17   17.30
   4   3  -4  349.96   14.90
   4   3  -4  342.17   21.30
  -4  -3   4  333.27   16.70
  -4  -3   4  354.46   14.50
  -4  -3   4  358.36   15.50
  -4  -3   4  358.06   17.20
  -4  -3   4  333.67   14.40
  -4  -3   4  348.17   17.20
   3   3  -4   71.79    6.80
   3   3  -4   80.19    5.50
   3   3  -4   80.99    8.00
   3   3  -4   70.89    7.40
   3   3  -4   71.49    6.80
  -3  -3   4   78.19    4.70
  -3  -3   4   78.89    6.80
  -3  -3   4   69.69    6.30
   2   3  -4   54.59    5.90
   2   3  -4   55.39    4.20
   2   3  -4   51.99    5.50
   2   3  -4   53.89    5.60
   2   3  -4   56.69    6.60
   2   3  -4   52.09    5.00
  -2  -3   4   52.09    3.40
  -2  -3   4   52.09    5.70
  -2  -3   4   50.89    4.60
  -2  -3   4   61.59    5.40
   1   3  -4    3.40    2.00
   1   3  -4    2.70    2.10
   1   3  -4    1.90    2.30
   1   3  -4    1.00    2.50
   1   3  -4    3.00    1.70
  -1  -3   4    5.20    2.20
  -1  -3   4    3.00    2.10
  -1  -3   4    2.00    1.40
   0   3  -4   14.80    2.50
   0   3  -4   18.30    3.50
   0   3  -4   12.40    2.40
   0   3  -4   17.10    3.30
   0  -3   4   16.30    2.70
   0  -3   4   16.50    2.60
   0  -3   4   14.00    2.90
  -1   3  -4  363.16   15.10
  -1   3  -4  359.46   15.50
  -1   3  -4  365.46   15.40
   1  -3   4  379.76   15.60
   1  -3   4  392.46   15.40
  -2   3  -4  216.18   10.50
  -2   3  -4  209.48   10.60
  -2   3  -4  197.18    9.90
  -2   3  -4  219.88   11.30
   2  -3   4  210.78   10.40
  -3   3  -4 1178.18   44.30
  -3   3  -4 1237.38   46.10
  -3   3  -4 1179.58   44.50
  -3   3  -4 1147.09   45.00
   3  -3   4 1225.98   44.80
   3  -3   4 1160.18   42.60
  -4   3  -4  415.86   18.90
  -4   3  -4  428.86   19.70
  -4   3  -4  406.06   19.00
  -4   3  -4  392.66   19.90
   4  -3   4  423.76   17.20
   4  -3   4  425.56   17.20
   4  -3   4  437.46   20.00
  -5   3  -4  319.77   16.70
  -5   3  -4  310.37   13.90
  -5   3  -4  299.47   15.80
  -5   3  -4  296.07   17.00
  -5   3  -4  297.87   15.40
  -5   3  -4  274.27   15.70
   5  -3   4  310.27   14.20
   5  -3   4  320.57   16.90
  -6   3  -4   15.30    4.30
  -6   3  -4   16.40    5.40
  -6   3  -4   12.40    5.30
  -6   3  -4   20.00    5.70
  -6   3  -4   15.80    5.40
   6  -3   4   14.00    4.00
   6  -3   4   12.40    5.30
  -7   3  -4  524.75   25.30
  -7   3  -4  463.65   24.90
  -7   3  -4  508.35   25.30
  -7   3  -4  517.35   25.50
  -7   3  -4  481.45   22.60
   7  -3   4  464.45   25.30
   7  -3   4  516.15   22.70
  -8   3  -4    2.30    6.10
  -8   3  -4   -2.80    5.60
  -8   3  -4   -4.00    4.30
  -8   3  -4    0.20    6.00
   8  -3   4   -1.90    5.10
  -9   3  -4    8.00    7.50
  -9   3  -4    1.30    5.60
  -9   3  -4    5.70    7.10
  -9   3  -4    4.30    7.40
   9  -3   4    9.70    6.60
 -10   3  -4    2.80    7.70
 -10   3  -4   -6.30    5.60
 -10   3  -4   -0.60    7.50
 -10   3  -4   -3.90    7.40
  10  -3   4    6.90    7.00
 -11   3  -4    4.00    8.10
 -11   3  -4    8.70    7.20
 -11   3  -4    8.80    9.70
 -11   3  -4   16.50   10.10
  11  -3   4   13.30    8.70
  11   2  -4   49.10    8.70
 -11  -2   4   61.79   12.50
 -11  -2   4   63.39   12.20
  10   2  -4   48.90   10.40
  10   2  -4   26.40    6.00
 -10  -2   4   32.10    8.20
 -10  -2   4   46.10    9.90
 -10  -2   4   25.00    9.10
   9   2  -4  381.26   18.70
   9   2  -4  371.66   23.30
  -9  -2   4  362.16   21.30
  -9  -2   4  390.76   21.00
  -9  -2   4  386.36   24.40
   8   2  -4   88.59   12.20
   8   2  -4   79.79    7.80
   8   2  -4   74.29   10.20
  -8  -2   4   54.59   10.60
  -8  -2   4   66.99   11.50
  -8  -2   4   97.59    9.70
  -8  -2   4   72.29    9.60
   7   2  -4   51.69    8.50
   7   2  -4   43.30    9.70
   7   2  -4   36.70    5.80
   7   2  -4   51.69    9.20
  -7  -2   4   71.49   10.20
  -7  -2   4   26.00    6.10
  -7  -2   4   53.69    9.10
  -7  -2   4   54.29    7.40
   6   2  -4  220.58   14.60
   6   2  -4  206.18   13.90
   6   2  -4  202.28   15.20
   6   2  -4  228.48   11.60
  -6  -2   4  248.08   14.90
  -6  -2   4  199.48   12.20
  -6  -2   4  209.38   14.80
  -6  -2   4  230.68   13.10
   5   2  -4 1233.28   44.40
   5   2  -4 1180.78   47.60
   5   2  -4 1103.19   48.20
   5   2  -4 1181.78   47.10
  -5  -2   4 1173.78   47.40
  -5  -2   4 1164.88   45.60
  -5  -2   4 1237.28   47.50
  -5  -2   4 1231.28   45.00
  -5  -2   4 1135.89   51.39
  -5  -2   4 1191.88   47.50
   4   2  -4 3427.76  125.29
   4   2  -4 3419.16  126.69
   4   2  -4 3492.65  122.79
   4   2  -4 3496.15  125.79
   4   2  -4 3497.95  126.09
  -4  -2   4 3477.15  123.89
  -4  -2   4 3380.26  125.29
  -4  -2   4 3599.24  126.69
  -4  -2   4 3474.55  125.59
  -4  -2   4 3467.85  122.69
  -4  -2   4 3568.64  125.49
   3   2  -4  366.26   17.20
   3   2  -4  316.87   16.50
   3   2  -4  342.87   14.40
   3   2  -4  342.57   16.20
   3   2  -4  369.06   16.70
   3   2  -4  345.57   17.30
  -3  -2   4  330.37   14.90
  -3  -2   4  358.26   16.30
  -3  -2   4  350.46   14.10
  -3  -2   4  360.56   17.20
   2   2  -4  117.69    6.10
   2   2  -4  125.89    8.10
   2   2  -4  112.89    7.50
   2   2  -4  105.99    6.90
   2   2  -4  117.99    8.60
   2   2  -4  132.89    8.10
  -2  -2   4  121.19    6.50
  -2  -2   4  115.89    6.00
  -2  -2   4  123.49    7.40
  -2  -2   4  107.79    7.30
  -2  -2   4  114.39    8.00
  -2  -2   4  122.89    5.80
   1   2  -4  272.47   11.60
   1   2  -4  274.37   11.20
   1   2  -4  295.37   13.40
   1   2  -4  273.77   12.40
   1   2  -4  282.27   11.00
   1   2  -4  257.27   12.20
  -1  -2   4  263.57   12.50
  -1  -2   4  296.67   12.30
  -1  -2   4  271.37   11.00
   0   2  -4    3.30    1.80
   0   2  -4    1.10    1.90
   0   2  -4    2.80    2.40
   0   2  -4    3.50    2.00
   0   2  -4    3.00    1.40
   0  -2   4    1.50    1.90
   0  -2   4    5.70    1.80
   0  -2   4    1.90    1.80
  -1   2  -4  209.78   10.00
  -1   2  -4  208.78    9.60
  -1   2  -4  189.78    9.40
   1  -2   4  204.48    8.90
   1  -2   4  209.98    9.20
   1  -2   4  202.48    9.50
   1  -2   4  210.98    8.80
  -2   2  -4   26.40    4.50
  -2   2  -4   35.70    4.30
  -2   2  -4   36.60    4.90
  -2   2  -4   35.10    4.70
   2  -2   4   19.70    4.00
   2  -2   4   34.40    3.70
   2  -2   4   35.90    3.40
  -3   2  -4   40.70    5.60
  -3   2  -4   50.39    5.30
  -3   2  -4   36.50    5.10
  -3   2  -4   52.79    5.80
  -3   2  -4   48.20    3.80
   3  -2   4   45.80    4.60
   3  -2   4   50.49    5.60
   3  -2   4   47.10    4.50
  -4   2  -4   22.00    5.20
  -4   2  -4   21.70    5.30
  -4   2  -4   20.00    3.60
  -4   2  -4   37.20    4.40
  -4   2  -4   23.30    5.50
  -4   2  -4   28.90    5.70
  -4   2  -4   23.50    5.60
   4  -2   4   25.20    5.20
   4  -2   4   24.90    4.40
  -5   2  -4    8.60    4.50
  -5   2  -4   14.40    4.70
  -5   2  -4   24.40    5.60
  -5   2  -4   24.40    5.40
  -5   2  -4   26.50    4.90
  -5   2  -4   22.60    5.20
   5  -2   4   12.80    3.50
   5  -2   4   15.10    4.40
  -6   2  -4   60.49    8.50
  -6   2  -4   58.79    8.30
  -6   2  -4   58.19    8.50
  -6   2  -4   59.89    8.80
  -6   2  -4   64.09    6.90
   6  -2   4   57.29    6.70
   6  -2   4   41.70    7.30
  -7   2  -4   13.90    6.10
  -7   2  -4   10.90    5.50
  -7   2  -4    8.00    4.60
  -7   2  -4   10.00    5.40
  -7   2  -4    4.00    5.40
   7  -2   4    5.30    4.60
   7  -2   4   13.70    4.70
  -8   2  -4   43.10    9.90
  -8   2  -4   34.50    6.90
  -8   2  -4   47.10   10.60
  -8   2  -4   44.30   10.50
   8  -2   4   46.40    8.80
  -9   2  -4  121.19   12.30
  -9   2  -4  156.78   14.80
  -9   2  -4  128.89   15.30
  -9   2  -4  145.19   15.40
   9  -2   4  124.39   13.60
 -10   2  -4  102.19   15.60
 -10   2  -4   87.29   12.00
 -10   2  -4  110.19   14.30
 -10   2  -4  100.59   15.50
  10  -2   4   73.89   13.10
 -11   2  -4   76.09   12.80
 -11   2  -4  107.79   17.20
 -11   2  -4   80.99   15.90
 -11   2  -4  102.19   15.90
  11   1  -4    8.10    5.30
 -11  -1   4   29.90    8.90
 -11  -1   4   13.10   11.50
 -11  -1   4   15.20    7.80
  10   1  -4   13.80    5.20
  10   1  -4   15.40    7.50
 -10  -1   4    7.10    8.30
 -10  -1   4   17.40    7.30
 -10  -1   4   17.30    7.20
   9   1  -4  144.69   10.60
   9   1  -4  159.48   14.80
  -9  -1   4  186.78   17.00
  -9  -1   4  127.59   13.00
  -9  -1   4  167.48   13.90
   8   1  -4   72.39    7.60
   8   1  -4   96.89   11.10
   8   1  -4   87.19   12.00
  -8  -1   4   81.79   10.10
  -8  -1   4   79.79   12.20
  -8  -1   4   86.89   11.50
  -8  -1   4   95.09   10.30
   7   1  -4   48.30    5.90
   7   1  -4   32.80    7.90
   7   1  -4   50.79    9.60
  -7  -1   4   44.20    9.70
  -7  -1   4   55.59    8.00
  -7  -1   4   44.30    8.80
  -7  -1   4   52.89    8.00
   6   1  -4    6.10    2.80
   6   1  -4    1.20    4.50
   6   1  -4    8.90    4.40
   6   1  -4   -4.40    3.60
  -6  -1   4    3.90    4.10
  -6  -1   4    6.60    4.80
  -6  -1   4    5.60    3.80
  -6  -1   4    3.30    3.60
  -6  -1   4    8.20    5.30
   5   1  -4  101.89    7.00
   5   1  -4  109.39    9.90
   5   1  -4  111.09   10.30
   5   1  -4  109.39    9.20
   5   1  -4   89.19    9.80
  -5  -1   4  119.19    9.50
  -5  -1   4  119.19    8.70
  -5  -1   4  108.39    9.90
  -5  -1   4  114.29    9.60
  -5  -1   4  110.19   10.20
   4   1  -4  378.16   20.70
   4   1  -4  480.45   21.00
   4   1  -4  442.36   20.10
   4   1  -4  434.26   17.90
   4   1  -4  450.05   21.00
  -4  -1   4  446.86   20.80
  -4  -1   4  422.96   21.10
  -4  -1   4  438.86   17.90
  -4  -1   4  409.56   20.00
  -4  -1   4  474.55   20.90
  -4  -1   4  450.95   19.30
   3   1  -4  148.39    7.50
   3   1  -4  131.19    8.30
   3   1  -4  152.68   10.30
   3   1  -4  156.38    9.60
   3   1  -4  150.08    9.10
   3   1  -4  146.79    9.80
  -3  -1   4  155.28    9.40
  -3  -1   4  150.88    7.30
  -3  -1   4  158.58    9.40
  -3  -1   4  127.29    9.60
  -3  -1   4  130.69    9.10
  -3  -1   4  141.59    8.30
   2   1  -4  212.18   11.20
   2   1  -4  201.78    9.10
   2   1  -4  213.48   10.90
   2   1  -4  210.18   10.60
   2   1  -4  209.48   10.00
   2   1  -4  201.98   11.60
  -2  -1   4  198.08    8.90
  -2  -1   4  208.68   10.70
  -2  -1   4  233.28   10.00
  -2  -1   4  203.68   10.50
  -2  -1   4  196.58   11.10
   1   1  -4 1002.70   37.20
   1   1  -4  987.60   38.60
   1   1  -4 1011.10   36.60
   1   1  -4 1092.69   38.10
   1   1  -4  982.30   37.80
  -1  -1   4 1016.20   36.90
  -1  -1   4 1007.40   37.00
  -1  -1   4 1009.40   38.40
  -1  -1   4 1013.70   37.70
  -1  -1   4 1052.29   36.40
   0   1  -4 2145.19   76.99
   0   1  -4 2165.28   77.69
   0   1  -4 2097.69   76.79
   0   1  -4 2146.59   76.59
   0   1  -4 2138.29   76.29
   0  -1   4 2163.48   76.39
   0  -1   4 2194.78   75.99
   0  -1   4 2189.18   77.39
   0  -1   4 2241.88   75.69
   0  -1   4 2179.18   76.79
  -1   1  -4   -2.40    2.40
  -1   1  -4    0.90    2.10
  -1   1  -4    0.20    2.40
  -1   1  -4    1.20    1.80
  -1   1  -4    2.10    2.20
   1  -1   4   -0.60    1.80
   1  -1   4   -2.30    1.40
   1  -1   4   -1.10    1.80
   1  -1   4    1.70    2.00
  -2   1  -4   36.20    4.40
  -2   1  -4   39.70    5.00
  -2   1  -4   38.30    3.50
  -2   1  -4   33.60    4.30
  -2   1  -4   44.00    4.70
   2  -1   4   37.90    4.10
   2  -1   4   39.70    4.20
   2  -1   4   48.10    4.30
   2  -1   4   41.50    3.00
  -3   1  -4 1755.72   63.59
  -3   1  -4 1747.73   63.39
  -3   1  -4 1753.62   63.29
  -3   1  -4 1751.92   61.79
  -3   1  -4 1731.93   61.69
   3  -1   4 1732.73   62.79
   3  -1   4 1713.83   63.79
   3  -1   4 1686.23   60.99
   3  -1   4 1710.33   62.79
  -4   1  -4   55.19    6.30
  -4   1  -4   55.89    6.40
  -4   1  -4   41.50    6.20
  -4   1  -4   53.39    4.70
  -4   1  -4   37.20    5.90
  -4   1  -4   42.90    5.90
  -4   1  -4   65.89    5.40
   4  -1   4   57.49    6.20
   4  -1   4   54.89    3.90
   4  -1   4   44.90    5.60
   4  -1   4   55.59    5.70
  -5   1  -4  158.38   11.30
  -5   1  -4  157.58   11.30
  -5   1  -4  169.68   11.30
  -5   1  -4  148.19   10.30
  -5   1  -4  167.98    9.70
  -5   1  -4  177.28   11.50
   5  -1   4  161.18   10.90
   5  -1   4  154.78   10.20
   5  -1   4  163.08    7.90
  -6   1  -4  310.97   16.60
  -6   1  -4  295.57   17.20
  -6   1  -4  291.47   17.10
  -6   1  -4  316.57   17.60
  -6   1  -4  293.67   15.30
  -6   1  -4  329.97   17.60
   6  -1   4  296.77   16.10
   6  -1   4  307.87   17.10
   6  -1   4  321.67   13.60
   6  -1   4  296.17   13.00
  -7   1  -4  409.06   21.70
  -7   1  -4  397.86   21.40
  -7   1  -4  344.07   20.80
  -7   1  -4  414.46   19.40
  -7   1  -4  405.06   20.60
   7  -1   4  383.16   16.30
   7  -1   4  363.46   19.70
   7  -1   4  392.86   21.20
   7  -1   4  390.86   16.80
  -8   1  -4  414.76   23.40
  -8   1  -4  408.36   23.60
  -8   1  -4  440.66   21.10
  -8   1  -4  411.66   22.10
  -8   1  -4  346.07   22.70
   8  -1   4  397.56   21.50
   8  -1   4  417.36   17.30
   8  -1   4  393.56   17.80
   8  -1   4  393.56   22.70
  -9   1  -4  366.96   23.20
  -9   1  -4  400.26   24.00
  -9   1  -4  356.06   20.10
  -9   1  -4  355.76   21.50
   9  -1   4  342.57   15.90
   9  -1   4  340.57   21.90
 -10   1  -4   -7.50    5.20
 -10   1  -4   11.50    8.00
 -10   1  -4    1.20    7.60
 -10   1  -4   -2.50    6.60
  10  -1   4   -5.60    5.40
 -11   1  -4   53.59   11.60
 -11   1  -4   32.00   10.80
 -11   1  -4   67.29   12.30
 -11   1  -4   60.49   15.00
  11   0  -4  169.48   16.60
 -11   0   4  191.78   17.50
 -11   0   4  182.78   17.00
 -11   0   4  157.38   19.70
  10   0  -4   29.40    9.00
 -10   0   4   23.00    9.10
 -10   0   4   13.50    7.00
 -10   0   4   25.20    8.30
   9   0  -4    6.60    4.00
   9   0  -4    1.90    5.30
  -9   0   4    3.50    6.20
  -9   0   4    5.50    5.50
  -9   0   4    7.30    6.70
  -9   0   4   -1.20    5.20
   8   0  -4   16.20    4.20
   8   0  -4   21.00    7.00
   8   0  -4    9.00    5.70
  -8   0   4   10.30    6.00
  -8   0   4    7.00    5.10
  -8   0   4    7.20    6.70
  -8   0   4    9.30    6.10
   7   0  -4  284.97   13.60
   7   0  -4  285.87   17.80
   7   0  -4  275.07   17.90
  -7   0   4  249.48   15.70
  -7   0   4  258.77   17.00
  -7   0   4  293.27   18.90
  -7   0   4  265.97   18.40
  -7   0   4  255.67   15.90
   6   0  -4    6.80    4.90
   6   0  -4    1.60    4.20
   6   0  -4    7.10    2.90
   6   0  -4    4.00    4.20
  -6   0   4    2.20    4.50
  -6   0   4    0.10    4.30
  -6   0   4    7.40    4.10
  -6   0   4    1.90    3.60
  -6   0   4    2.80    4.10
   5   0  -4  763.82   29.20
   5   0  -4  755.12   31.80
   5   0  -4  726.23   32.40
   5   0  -4  803.42   33.30
   5   0  -4  779.62   33.30
  -5   0   4  731.73   32.80
  -5   0   4  794.72   33.00
  -5   0   4  741.63   31.00
  -5   0   4  715.83   33.10
  -5   0   4  763.22   32.30
   4   0  -4  554.34   23.70
   4   0  -4  552.74   24.50
   4   0  -4  519.85   24.60
   4   0  -4  546.65   22.80
   4   0  -4  549.25   24.50
   4   0  -4  540.15   21.40
  -4   0   4  564.24   23.20
  -4   0   4  515.05   24.70
  -4   0   4  570.04   24.70
  -4   0   4  514.55   23.70
  -4   0   4  581.64   24.70
   3   0  -4  413.96   18.30
   3   0  -4  403.16   18.20
   3   0  -4  408.76   18.50
   3   0  -4  385.86   15.60
   3   0  -4  390.46   17.30
   3   0  -4  353.96   16.40
  -3   0   4  378.76   18.00
  -3   0   4  397.26   16.90
  -3   0   4  411.26   18.60
  -3   0   4  370.46   17.80
  -3   0   4  380.36   15.60
  -3   0   4  383.16   17.50
   2   0  -4  187.08   10.70
   2   0  -4  199.58   10.40
   2   0  -4  172.88   10.10
   2   0  -4  180.08    9.20
   2   0  -4  185.88    9.70
   2   0  -4  194.28    8.80
  -2   0   4  187.58   10.00
  -2   0   4  200.18    8.30
  -2   0   4  177.88   10.00
  -2   0   4  175.38    9.70
  -2   0   4  194.28   10.60
  -2   0   4  193.48    9.30
   1   0  -4  486.35   20.80
   1   0  -4  508.45   19.60
   1   0  -4  534.85   20.50
   1   0  -4  483.75   18.80
   1   0  -4  497.15   20.00
  -1   0   4  501.35   18.50
  -1   0   4  499.35   20.10
  -1   0   4  498.55   18.60
  -1   0   4  465.35   20.50
  -1   0   4  485.25   19.40
  -1   0   4  516.95   20.10
   0   0  -4  370.86   15.50
   0   0  -4  398.16   15.70
   0   0  -4  364.86   16.30
   0   0  -4  358.86   15.30
   0   0  -4  384.66   15.00
   0   0   4  390.76   15.50
   0   0   4  383.46   16.10
   0   0   4  353.36   15.10
   0   0   4  393.66   15.00
   0   0   4  369.56   14.30
   0   0   4  370.46   15.40
  -1   0  -4   99.59    6.40
  -1   0  -4   93.19    6.80
  -1   0  -4   92.89    5.40
  -1   0  -4   87.29    6.20
   1   0   4   82.59    6.30
   1   0   4   97.49    6.20
   1   0   4   96.49    6.10
   1   0   4   81.59    5.60
   1   0   4   98.89    5.40
  -2   0  -4  843.72   31.70
  -2   0  -4  890.71   32.50
  -2   0  -4  867.01   30.90
  -2   0  -4  797.02   32.00
  -2   0  -4  831.12   30.80
  -2   0  -4  823.82   31.90
   2   0   4  824.12   31.90
   2   0   4  855.81   31.50
   2   0   4  838.02   30.60
   2   0   4  824.02   31.70
  -3   0  -4    2.00    2.70
  -3   0  -4    1.40    2.50
  -3   0  -4   -1.80    2.50
  -3   0  -4    2.00    2.30
  -3   0  -4    2.90    2.10
  -3   0  -4    3.40    2.60
  -3   0  -4    1.10    2.70
   3   0   4    2.40    2.40
   3   0   4    1.10    1.70
   3   0   4    2.10    2.30
   3   0   4    0.00    1.60
   3   0   4    0.50    2.20
  -4   0  -4   23.60    4.50
  -4   0  -4   27.20    5.90
  -4   0  -4   23.20    5.20
  -4   0  -4   17.40    3.70
  -4   0  -4   14.80    4.00
  -4   0  -4   36.50    5.30
  -4   0  -4   23.20    5.60
   4   0   4   24.50    3.60
   4   0   4   24.90    3.50
   4   0   4   25.30    4.90
   4   0   4   32.40    5.00
   4   0   4   25.80    5.00
  -5   0  -4  589.84   27.20
  -5   0  -4  647.54   25.80
  -5   0  -4  662.93   26.80
  -5   0  -4  675.73   27.70
  -5   0  -4  599.84   27.10
  -5   0  -4  597.44   27.20
   5   0   4  619.44   26.80
   5   0   4  609.64   24.60
   5   0   4  657.83   27.50
   5   0   4  619.64   26.60
   5   0   4  628.54   24.20
  -6   0  -4  540.05   25.00
  -6   0  -4  481.65   24.40
  -6   0  -4  527.15   23.60
  -6   0  -4  514.95   22.70
  -6   0  -4  487.75   24.40
  -6   0  -4  548.85   25.20
   6   0   4  548.05   24.30
   6   0   4  512.45   20.90
   6   0   4  496.55   21.30
   6   0   4  533.25   24.60
   6   0   4  520.75   23.20
  -7   0  -4  626.04   27.70
  -7   0  -4  586.74   29.10
  -7   0  -4  596.74   29.10
  -7   0  -4  628.24   26.90
  -7   0  -4  601.84   29.20
   7   0   4  599.54   28.60
   7   0   4  596.94   27.00
   7   0   4  575.44   27.80
   7   0   4  625.54   24.40
  -8   0  -4   69.39    9.10
  -8   0  -4   74.19   10.10
  -8   0  -4   60.09   10.80
  -8   0  -4   63.89   11.10
  -8   0  -4   74.99   11.80
   8   0   4   56.19    8.80
   8   0   4   87.79   10.30
   8   0   4   61.59    6.20
   8   0   4   66.19    9.30
  -9   0  -4  328.97   22.20
  -9   0  -4  323.67   19.90
  -9   0  -4  297.27   18.60
  -9   0  -4  296.47   21.20
   9   0   4  344.37   15.60
   9   0   4  310.47   20.40
 -10   0  -4   19.60    7.10
 -10   0  -4   38.00   10.10
 -10   0  -4   34.90    8.90
 -10   0  -4   14.50    7.70
  10   0   4   17.80    7.70
  10   0   4   23.90    5.00
 -11   0  -4   12.70    8.60
 -11   0  -4   15.70    8.00
 -11   0  -4    8.40    9.10
  11   0   4   10.00    4.30
  11   0   4   13.30    7.90
 -12   0  -4  126.09   16.30
  11  -1  -4  140.09   15.80
 -11   1   4  119.29   14.40
 -11   1   4  140.29   16.60
 -11   1   4  148.09   19.10
  10  -1  -4  377.66   25.00
  10  -1  -4  355.36   22.90
 -10   1   4  361.06   23.40
 -10   1   4  426.46   27.20
 -10   1   4  379.56   22.80
   9  -1  -4  213.78   17.10
   9  -1  -4  176.38   15.20
  -9   1   4  234.48   16.10
  -9   1   4  204.48   16.40
  -9   1   4  188.68   16.90
  -9   1   4  214.88   18.70
   8  -1  -4   76.89   10.60
   8  -1  -4   43.80    9.20
  -8   1   4   79.39    9.90
  -8   1   4   86.69   11.30
  -8   1   4   79.39   11.10
  -8   1   4   81.79   12.60
   7  -1  -4  154.28   12.40
   7  -1  -4  168.68   13.30
   7  -1  -4  128.99   11.30
   7  -1  -4  142.09   12.50
  -7   1   4  144.69   11.50
  -7   1   4  157.58   12.60
  -7   1   4  121.99   13.20
  -7   1   4  152.08   13.80
  -7   1   4  142.19   12.50
   6  -1  -4   88.69    9.90
   6  -1  -4  104.69    9.10
   6  -1  -4  115.69   10.30
   6  -1  -4  120.69   10.70
  -6   1   4  115.79   10.00
  -6   1   4   92.79   10.40
  -6   1   4  103.49    9.20
  -6   1   4   91.99    9.50
  -6   1   4   93.79   10.60
   5  -1  -4  937.51   38.80
   5  -1  -4  985.50   40.10
   5  -1  -4  941.81   37.80
   5  -1  -4  890.61   36.70
   5  -1  -4  912.91   38.20
   5  -1  -4  908.81   35.60
  -5   1   4  989.00   38.90
  -5   1   4  872.31   37.50
  -5   1   4  897.31   38.50
  -5   1   4  924.71   36.70
  -5   1   4  852.21   38.40
   4  -1  -4  464.95   20.50
   4  -1  -4  466.45   21.10
   4  -1  -4  430.36   19.20
   4  -1  -4  461.15   21.50
   4  -1  -4  486.45   20.40
   4  -1  -4  484.65   21.80
  -4   1   4  472.85   20.10
  -4   1   4  458.85   20.80
  -4   1   4  428.96   21.30
  -4   1   4  446.66   21.30
  -4   1   4  473.35   22.00
   3  -1  -4  153.98    9.80
   3  -1  -4  156.28    9.80
   3  -1  -4  138.49    9.30
   3  -1  -4  145.09    8.20
   3  -1  -4  152.68    8.70
   3  -1  -4  147.89    8.80
  -3   1   4  132.19    9.10
  -3   1   4  148.89    9.80
  -3   1   4  159.98    9.30
  -3   1   4  143.69    7.20
  -3   1   4  148.69    8.60
  -3   1   4  146.39    9.80
   2  -1  -4  517.75   20.10
   2  -1  -4  497.45   20.50
   2  -1  -4  505.05   20.90
   2  -1  -4  503.65   20.00
   2  -1  -4  501.45   19.40
   2  -1  -4  505.05   20.80
  -2   1   4  490.55   19.70
  -2   1   4  466.55   20.80
  -2   1   4  497.55   20.70
  -2   1   4  462.85   18.50
  -2   1   4  485.85   19.30
  -2   1   4  488.15   20.00
  -2   1   4  455.85   20.40
   1  -1  -4   52.49    5.30
   1  -1  -4   50.99    5.00
   1  -1  -4   44.70    4.60
   1  -1  -4   43.20    5.30
   1  -1  -4   52.49    4.60
   1  -1  -4   56.89    4.30
  -1   1   4   47.40    5.20
  -1   1   4   43.20    5.00
  -1   1   4   47.70    4.60
  -1   1   4   48.10    4.30
  -1   1   4   41.90    4.20
   0  -1  -4  367.36   15.50
   0  -1  -4  378.46   15.00
   0  -1  -4  379.16   16.10
   0  -1  -4  391.26   15.60
   0  -1  -4  377.26   15.50
   0   1   4  362.46   15.50
   0   1   4  378.36   15.30
   0   1   4  391.76   16.20
   0   1   4  366.66   15.00
   0   1   4  380.56   15.50
   0   1   4  395.56   15.60
  -1  -1  -4 3060.59  107.79
  -1  -1  -4 3151.18  107.69
  -1  -1  -4 3110.59  108.59
  -1  -1  -4 2971.10  108.39
  -1  -1  -4 3147.59  109.09
  -1  -1  -4 3061.19  108.29
   1   1   4 3060.39  108.99
   1   1   4 3099.39  107.79
   1   1   4 3084.19  108.59
   1   1   4 3043.10  108.29
  -2  -1  -4  224.78   10.70
  -2  -1  -4  223.18   10.20
  -2  -1  -4  207.78    9.60
  -2  -1  -4  220.78   10.40
  -2  -1  -4  220.48    9.50
  -2  -1  -4  202.88   10.50
  -2  -1  -4  204.18   10.90
   2   1   4  212.28   10.70
   2   1   4  206.18   10.50
   2   1   4  209.38    9.50
   2   1   4  197.18    9.70
   2   1   4  225.88    9.40
  -3  -1  -4   71.99    5.40
  -3  -1  -4   71.29    5.10
  -3  -1  -4   70.79    6.60
  -3  -1  -4   66.59    5.60
  -3  -1  -4   73.29    6.60
  -3  -1  -4   73.79    6.00
  -3  -1  -4   60.59    6.10
   3   1   4   73.89    5.00
   3   1   4   78.29    6.20
   3   1   4   69.09    6.00
   3   1   4   80.29    6.00
   3   1   4   74.69    5.10
   3   1   4   64.89    5.40
  -4  -1  -4  341.47   15.10
  -4  -1  -4  356.86   14.70
  -4  -1  -4  307.47   16.20
  -4  -1  -4  323.67   16.30
  -4  -1  -4  329.57   15.40
  -4  -1  -4  317.97   16.00
  -4  -1  -4  334.97   16.60
   4   1   4  320.57   15.80
   4   1   4  346.47   16.00
   4   1   4  345.37   16.30
   4   1   4  349.57   16.20
   4   1   4  353.16   14.80
   4   1   4  348.97   14.30
  -5  -1  -4   95.49    7.60
  -5  -1  -4  110.19    9.20
  -5  -1  -4   83.09    7.60
  -5  -1  -4   77.69    8.50
  -5  -1  -4   96.19    8.50
  -5  -1  -4   98.99    9.30
   5   1   4   99.89    8.20
   5   1   4   95.59    8.30
   5   1   4   97.79    6.40
   5   1   4   92.19    6.80
   5   1   4   96.19    8.00
   5   1   4   87.09    8.30
  -6  -1  -4   32.50    7.50
  -6  -1  -4   45.60    7.00
  -6  -1  -4   25.60    6.50
  -6  -1  -4   34.60    7.20
  -6  -1  -4   27.30    6.30
  -6  -1  -4   36.60    6.40
   6   1   4   37.60    6.50
   6   1   4   35.60    6.50
   6   1   4   30.20    4.50
   6   1   4   31.20    6.60
   6   1   4   32.10    6.10
  -7  -1  -4   18.00    6.30
  -7  -1  -4   17.20    6.80
  -7  -1  -4   18.70    5.80
  -7  -1  -4   10.60    5.30
  -7  -1  -4   12.50    4.70
   7   1   4   27.60    9.20
   7   1   4   20.20    4.50
   7   1   4   22.30    5.80
   7   1   4   22.20    5.60
  -8  -1  -4   -1.50    4.50
  -8  -1  -4   -2.70    5.70
  -8  -1  -4    6.70    5.60
  -8  -1  -4    6.40    6.20
  -8  -1  -4    2.90    5.20
   8   1   4   -0.80    4.30
   8   1   4    7.70    5.00
   8   1   4    3.10    3.30
  -9  -1  -4    0.30    6.70
  -9  -1  -4    0.30    5.70
  -9  -1  -4    4.00    6.20
  -9  -1  -4   12.20    6.00
   9   1   4    2.00    3.80
   9   1   4   -0.60    4.50
 -10  -1  -4   22.40    8.90
 -10  -1  -4   24.50    8.10
 -10  -1  -4   16.90    8.90
 -10  -1  -4   18.00    7.90
  10   1   4   14.60    7.00
  10   1   4   14.20    4.80
 -11  -1  -4   -6.00    6.60
 -11  -1  -4    0.70    9.30
 -11  -1  -4    3.60    7.80
  11   1   4    0.90    4.20
  11   1   4    0.00    5.80
 -12  -1  -4   -3.30    7.60
 -12  -1  -4   -1.50    8.60
  12   1   4    4.40    4.70
  11  -2  -4  176.48   18.00
 -11   2   4  185.88   18.90
 -11   2   4  213.38   21.60
 -11   2   4  172.48   16.70
  10  -2  -4  279.27   20.50
  10  -2  -4  300.37   22.30
 -10   2   4  262.67   20.30
 -10   2   4  299.97   23.20
 -10   2   4  276.67   19.40
 -10   2   4  267.87   21.30
   9  -2  -4  134.49   14.20
   9  -2  -4  120.09   13.20
  -9   2   4   81.49   14.70
  -9   2   4  106.99   13.70
  -9   2   4  122.19   12.90
  -9   2   4  142.59   14.40
   8  -2  -4  421.96   24.90
   8  -2  -4  453.85   22.90
   8  -2  -4  418.56   23.80
  -8   2   4  425.16   24.40
  -8   2   4  438.86   25.70
  -8   2   4  460.35   24.60
  -8   2   4  469.25   23.40
   7  -2  -4   96.39   10.80
   7  -2  -4   96.09    9.50
   7  -2  -4   74.89    9.50
   7  -2  -4   92.59   10.20
   7  -2  -4   84.09    7.20
  -7   2   4  104.99   10.10
  -7   2   4   78.99   11.10
  -7   2   4   98.39   10.70
  -7   2   4   97.09   11.90
  -7   2   4   87.29   10.40
   6  -2  -4  630.64   29.40
   6  -2  -4  681.13   30.00
   6  -2  -4  686.63   31.20
   6  -2  -4  664.33   26.60
   6  -2  -4  608.74   28.40
  -6   2   4  673.83   29.90
  -6   2   4  690.33   31.10
  -6   2   4  623.74   30.60
  -6   2   4  688.63   28.80
   5  -2  -4   50.49    7.00
   5  -2  -4   50.99    7.50
   5  -2  -4   57.09    7.50
   5  -2  -4   66.39    7.30
   5  -2  -4   78.49    5.80
  -5   2   4   54.79    7.40
  -5   2   4   54.49    6.80
  -5   2   4   74.69    8.80
  -5   2   4   63.79    7.80
  -5   2   4   61.69    8.10
   4  -2  -4  580.54   22.70
   4  -2  -4  605.44   25.20
   4  -2  -4  581.64   24.40
   4  -2  -4  555.54   24.90
   4  -2  -4  606.44   26.00
   4  -2  -4  575.34   25.90
  -4   2   4  556.04   24.50
  -4   2   4  546.65   23.70
  -4   2   4  619.74   25.80
  -4   2   4  540.55   25.40
  -4   2   4  556.44   25.40
   3  -2  -4    1.60    2.40
   3  -2  -4    8.90    3.30
   3  -2  -4    4.20    2.10
   3  -2  -4    0.80    2.90
   3  -2  -4    5.70    3.40
   3  -2  -4    9.60    3.70
  -3   2   4    2.60    2.50
  -3   2   4    4.80    2.90
  -3   2   4    6.00    3.20
  -3   2   4    7.20    2.00
  -3   2   4    3.60    2.90
  -3   2   4    5.00    3.40
   2  -2  -4    8.90    3.10
   2  -2  -4   13.60    3.30
   2  -2  -4    9.40    2.50
   2  -2  -4   11.90    2.80
   2  -2  -4    8.30    3.20
   2  -2  -4   10.30    3.10
  -2   2   4   12.00    3.10
  -2   2   4   12.70    3.20
  -2   2   4   13.90    3.10
  -2   2   4   17.80    3.80
  -2   2   4   16.00    3.50
  -2   2   4   10.60    3.30
   1  -2  -4 1478.65   55.29
   1  -2  -4 1509.15   54.39
   1  -2  -4 1488.95   54.29
   1  -2  -4 1521.35   54.99
   1  -2  -4 1537.05   54.89
   1  -2  -4 1508.75   53.39
  -1   2   4 1483.55   55.09
  -1   2   4 1493.65   54.39
  -1   2   4 1509.85   55.09
  -1   2   4 1480.35   54.59
  -1   2   4 1551.84   53.89
   0  -2  -4    2.40    2.10
   0  -2  -4    1.50    2.30
   0  -2  -4    3.50    1.80
   0  -2  -4    4.40    2.20
   0  -2  -4    4.20    1.60
   0   2   4   -0.10    1.90
   0   2   4    4.60    2.30
   0   2   4   -1.60    2.00
   0   2   4    4.20    2.20
   0   2   4    4.30    2.50
   0   2   4    3.30    2.20
   0   2   4    4.30    2.50
  -1  -2  -4   46.50    3.80
  -1  -2  -4   45.00    4.30
  -1  -2  -4   47.10    4.40
  -1  -2  -4   50.59    4.60
  -1  -2  -4   45.60    3.80
  -1  -2  -4   43.20    4.90
  -1  -2  -4   31.20    4.00
   1   2   4   41.20    3.60
   1   2   4   41.10    3.90
   1   2   4   50.49    4.90
   1   2   4   51.99    4.60
   1   2   4   48.80    4.70
  -2  -2  -4  360.46   15.20
  -2  -2  -4  348.07   15.10
  -2  -2  -4  365.26   14.70
  -2  -2  -4  355.46   14.00
  -2  -2  -4  339.67   14.80
  -2  -2  -4  309.47   15.10
   2   2   4  346.07   14.10
   2   2   4  363.06   14.10
   2   2   4  344.27   15.00
   2   2   4  352.36   14.50
   2   2   4  334.87   15.30
   2   2   4  344.37   15.20
  -3  -2  -4  192.08    9.40
  -3  -2  -4  205.08   10.80
  -3  -2  -4  208.08   10.80
  -3  -2  -4  178.18    9.60
  -3  -2  -4  162.08   10.20
  -3  -2  -4  185.48    8.90
  -3  -2  -4  200.08   10.10
   3   2   4  192.18    9.80
   3   2   4  181.28    9.20
   3   2   4  186.18    9.10
   3   2   4  179.18   10.30
   3   2   4  198.48   10.30
   3   2   4  193.18   10.60
   3   2   4  190.08    9.00
  -4  -2  -4  215.18   11.30
  -4  -2  -4  227.48   12.70
  -4  -2  -4  223.48   12.70
  -4  -2  -4  216.18   12.50
  -4  -2  -4  210.08   11.60
  -4  -2  -4  202.78   10.50
  -4  -2  -4  206.68   11.00
   4   2   4  205.58   10.70
   4   2   4  216.08   12.00
   4   2   4  232.38   12.20
   4   2   4  237.38   11.90
   4   2   4  230.18   10.60
   4   2   4  241.48   12.80
  -5  -2  -4   55.79    6.30
  -5  -2  -4   58.79    7.90
  -5  -2  -4   60.69    8.20
  -5  -2  -4   52.39    6.30
  -5  -2  -4   46.50    6.40
  -5  -2  -4   50.69    7.50
   5   2   4   53.19    7.10
   5   2   4   62.39    7.50
   5   2   4   54.99    6.90
   5   2   4   69.79    5.70
   5   2   4   74.29    6.90
  -6  -2  -4   -0.10    3.60
  -6  -2  -4   -1.20    3.50
  -6  -2  -4    2.80    4.00
  -6  -2  -4    2.80    3.70
  -6  -2  -4   -0.60    4.00
  -6  -2  -4   -5.30    4.30
   6   2   4    0.90    2.60
   6   2   4    0.30    3.40
   6   2   4    3.10    3.20
   6   2   4   -1.80    3.30
   6   2   4   -2.10    3.40
  -7  -2  -4  280.17   18.40
  -7  -2  -4  319.77   17.00
  -7  -2  -4  316.37   16.90
  -7  -2  -4  319.97   19.40
  -7  -2  -4  309.67   19.10
   7   2   4  340.17   18.40
   7   2   4  344.67   15.30
   7   2   4  311.17   17.80
   7   2   4  342.57   19.10
  -8  -2  -4   25.00    8.00
  -8  -2  -4   18.40    5.90
  -8  -2  -4   28.40    7.90
  -8  -2  -4   11.10    5.60
   8   2   4   19.70    6.10
   8   2   4   29.10    7.40
   8   2   4   26.20    5.60
  -9  -2  -4  111.49   11.70
  -9  -2  -4  117.79   13.90
  -9  -2  -4  113.89   12.30
  -9  -2  -4  141.19   15.20
   9   2   4   99.89   11.50
   9   2   4  115.19   13.00
   9   2   4  120.79    9.20
 -10  -2  -4  109.59   12.80
 -10  -2  -4  114.09   15.90
 -10  -2  -4  132.59   13.90
  10   2   4   92.19   12.50
  10   2   4  122.59    9.80
 -11  -2  -4   14.50    8.10
 -11  -2  -4    2.60    6.70
 -11  -2  -4   18.70   10.50
  11   2   4    6.30    4.70
  11   2   4   16.70    7.60
 -12  -2  -4    9.20    8.70
 -12  -2  -4   17.90    9.30
  12   2   4   13.80    5.90
  10  -3  -4   18.10   13.70
  10  -3  -4   12.40    8.40
 -10   3   4   10.10    7.20
 -10   3   4   18.00    9.10
 -10   3   4    4.80    7.60
 -10   3   4   16.40    8.50
   9  -3  -4  146.39   15.10
   9  -3  -4  154.28   15.50
  -9   3   4  160.68   16.80
  -9   3   4  113.09   14.90
  -9   3   4  132.29   13.50
  -9   3   4  178.78   16.30
   8  -3  -4  133.89   13.40
   8  -3  -4  120.29   13.10
  -8   3   4  140.89   12.30
  -8   3   4  118.79   13.40
  -8   3   4  129.89   13.50
  -8   3   4  123.59   14.20
   7  -3  -4   88.89   10.90
   7  -3  -4  113.89    9.30
   7  -3  -4  109.79   10.40
   7  -3  -4   98.09   11.20
  -7   3   4  101.49   10.10
  -7   3   4   87.69   11.50
  -7   3   4   78.49   11.70
  -7   3   4  108.39   12.20
  -7   3   4  117.49   11.60
   6  -3  -4   78.69    9.70
   6  -3  -4   84.09    7.60
   6  -3  -4   78.69    9.90
   6  -3  -4   71.99    8.40
  -6   3   4   63.99    7.90
  -6   3   4   74.09   10.10
  -6   3   4   84.49   10.10
  -6   3   4   73.19    9.20
   5  -3  -4   50.19    6.70
   5  -3  -4   39.10    5.60
   5  -3  -4   50.19    7.50
   5  -3  -4   37.50    7.30
  -5   3   4   41.80    7.30
  -5   3   4   40.40    6.30
  -5   3   4   47.40    6.80
  -5   3   4   32.60    7.00
  -5   3   4   44.60    7.80
   4  -3  -4  229.58   13.50
   4  -3  -4  184.98   12.70
   4  -3  -4  222.78   11.00
   4  -3  -4  199.58   11.80
  -4   3   4  209.68   12.80
  -4   3   4  208.38   12.00
  -4   3   4  216.08   13.00
  -4   3   4  227.18   13.00
  -4   3   4  205.68   11.20
   3  -3  -4  793.02   29.50
   3  -3  -4  743.93   31.70
   3  -3  -4  720.73   31.90
   3  -3  -4  769.12   30.50
  -3   3   4  822.02   31.40
  -3   3   4  761.12   31.40
  -3   3   4  781.12   30.50
  -3   3   4  769.72   31.50
  -3   3   4  797.72   29.80
   2  -3  -4  337.77   13.90
   2  -3  -4  325.27   15.70
   2  -3  -4  358.96   15.10
   2  -3  -4  341.17   14.40
   2  -3  -4  352.76   16.80
  -2   3   4  354.36   16.10
  -2   3   4  345.27   14.30
  -2   3   4  318.67   15.50
  -2   3   4  357.56   15.80
  -2   3   4  355.96   15.50
  -2   3   4  353.76   15.00
   1  -3  -4  165.48    8.20
   1  -3  -4  169.38    7.80
   1  -3  -4  153.78    9.70
   1  -3  -4  157.88    8.60
  -1   3   4  160.88    8.80
  -1   3   4  160.28    9.50
  -1   3   4  169.28    8.30
  -1   3   4  163.98    8.40
   0  -3  -4   29.00    3.40
   0  -3  -4   27.90    3.60
   0  -3  -4   23.50    2.70
   0  -3  -4   31.00    3.50
   0   3   4   24.00    4.60
   0   3   4   30.50    3.70
   0   3   4   28.50    4.00
   0   3   4   29.10    3.90
  -1  -3  -4   32.90    3.60
  -1  -3  -4   29.00    3.40
  -1  -3  -4   32.90    3.70
  -1  -3  -4   18.50    3.80
   1   3   4   32.80    4.20
   1   3   4   27.50    3.90
   1   3   4   27.40    3.00
   1   3   4   27.10    4.00
   1   3   4   31.20    3.70
   1   3   4   32.70    3.40
   1   3   4   28.20    3.60
  -2  -3  -4  953.10   38.40
  -2  -3  -4 1045.70   37.50
  -2  -3  -4 1017.90   38.10
  -2  -3  -4 1033.90   37.60
  -2  -3  -4  977.80   38.10
  -2  -3  -4 1017.00   38.40
   2   3   4 1027.00   38.70
   2   3   4 1069.59   37.40
   2   3   4 1014.90   38.30
   2   3   4 1017.10   38.60
   2   3   4 1048.90   37.30
   2   3   4 1035.10   38.00
  -3  -3  -4  609.24   24.50
  -3  -3  -4  571.34   23.50
  -3  -3  -4  606.34   24.50
  -3  -3  -4  597.34   23.50
  -3  -3  -4  589.44   22.60
  -3  -3  -4  573.14   24.10
  -3  -3  -4  605.64   23.00
   3   3   4  570.94   23.10
   3   3   4  585.34   24.50
   3   3   4  595.74   22.90
   3   3   4  590.14   24.60
   3   3   4  598.94   24.40
  -4  -3  -4 1386.16   52.79
  -4  -3  -4 1361.96   51.39
  -4  -3  -4 1430.06   50.69
  -4  -3  -4 1394.06   51.19
  -4  -3  -4 1168.88   52.19
  -4  -3  -4 1420.06   53.19
  -4  -3  -4 1381.06   51.89
   4   3   4 1454.95   50.89
   4   3   4 1437.96   53.29
   4   3   4 1391.06   52.79
   4   3   4 1409.16   52.89
   4   3   4 1435.96   51.99
  -5  -3  -4  924.51   36.60
  -5  -3  -4  889.11   36.80
  -5  -3  -4  843.22   36.30
  -5  -3  -4  884.31   34.40
  -5  -3  -4  862.81   34.40
  -5  -3  -4  888.01   33.80
  -5  -3  -4  875.31   35.40
   5   3   4  872.01   36.00
   5   3   4  923.91   35.50
   5   3   4  874.71   36.20
   5   3   4  838.52   36.40
   5   3   4  879.31   33.70
  -6  -3  -4   42.40    8.40
  -6  -3  -4   39.20    7.00
  -6  -3  -4   36.70    6.60
  -6  -3  -4   51.49    6.90
  -6  -3  -4   40.00    7.70
   6   3   4   42.50    5.40
   6   3   4   48.70    6.70
   6   3   4   41.90    7.60
   6   3   4   30.10    6.80
  -7  -3  -4  583.84   29.40
  -7  -3  -4  613.94   28.80
  -7  -3  -4  612.84   27.20
  -7  -3  -4  613.74   29.80
  -7  -3  -4  668.83   27.40
   7   3   4  598.94   28.20
   7   3   4  627.44   29.70
   7   3   4  630.04   28.90
   7   3   4  623.34   25.80
  -8  -3  -4   77.59   11.50
  -8  -3  -4   51.89    8.80
  -8  -3  -4   55.29    9.00
  -8  -3  -4   78.79   12.30
   8   3   4   53.39   10.20
   8   3   4   58.39    7.00
   8   3   4   60.39    9.60
   8   3   4   61.19    8.70
  -9  -3  -4   74.59   10.30
  -9  -3  -4   62.89   12.90
  -9  -3  -4   77.59   10.40
   9   3   4   57.19   11.10
   9   3   4   55.89   10.00
   9   3   4   61.49    7.70
 -10  -3  -4  158.88   17.40
 -10  -3  -4  123.59   13.50
 -10  -3  -4  168.78   14.70
  10   3   4  144.89   11.00
  10   3   4  165.78   15.10
 -11  -3  -4   87.59   13.20
 -11  -3  -4   59.19   13.60
 -11  -3  -4   59.79   12.60
  11   3   4   71.49    9.00
  11   3   4   87.79   13.00
  10  -4  -4   30.30    9.80
 -10   4   4   15.90    9.20
 -10   4   4   10.50    6.90
 -10   4   4   13.30    8.50
 -10   4   4   26.50   10.20
   9  -4  -4   -0.60    6.10
   9  -4  -4    1.70    6.30
  -9   4   4    1.40    7.00
  -9   4   4   11.50    6.20
  -9   4   4    3.70    6.50
  -9   4   4    7.30    7.70
   8  -4  -4    1.60    5.80
   8  -4  -4    0.00    5.90
  -8   4   4    5.50    5.20
  -8   4   4   -0.20    5.60
  -8   4   4    1.50    6.10
  -8   4   4   -0.20    6.10
   7  -4  -4  167.88   10.60
   7  -4  -4  162.28   14.50
   7  -4  -4  164.88   14.50
  -7   4   4  148.59   13.00
  -7   4   4  158.78   14.80
  -7   4   4  160.78   12.30
  -7   4   4  174.18   14.70
   6  -4  -4   68.49    7.80
   6  -4  -4   66.09    9.70
   6  -4  -4   49.40    5.40
   6  -4  -4   53.29    9.60
  -6   4   4   71.69    9.30
  -6   4   4   64.79    7.90
  -6   4   4   50.69    8.90
  -6   4   4   65.79   10.00
   5  -4  -4   96.49    7.90
   5  -4  -4   78.49    8.90
   5  -4  -4   77.19    9.70
   5  -4  -4   72.99    5.10
  -5   4   4   91.29    9.60
  -5   4   4  108.89    9.10
  -5   4   4  110.99    9.90
  -5   4   4   80.29    7.70
  -5   4   4   97.79    9.60
   4  -4  -4  270.77   13.30
   4  -4  -4  253.27   15.90
   4  -4  -4  259.77   15.40
  -4   4   4  262.17   14.90
  -4   4   4  288.27   15.00
  -4   4   4  291.67   15.60
  -4   4   4  270.47   14.00
  -4   4   4  284.97   13.30
   3  -4  -4   92.09    9.20
   3  -4  -4   88.49    7.80
   3  -4  -4   85.39    6.20
  -3   4   4   81.29    7.50
  -3   4   4   92.09    6.80
  -3   4   4   92.29    7.70
  -3   4   4   82.79    7.30
   2  -4  -4   80.69    6.80
   2  -4  -4   81.79    5.20
   2  -4  -4   75.39    8.10
  -2   4   4   87.49    5.90
  -2   4   4   73.09    6.60
  -2   4   4   81.79    6.30
  -2   4   4   81.49    6.70
   1  -4  -4 2313.97   81.69
   1  -4  -4 2229.78   83.79
  -1   4   4 2274.07   80.79
  -1   4   4 2267.17   83.39
  -1   4   4 2299.77   80.69
  -1   4   4 2255.17   81.39
  -1   4   4 2281.77   81.39
   0  -4  -4  213.28   10.00
   0   4   4  244.88   12.70
   0   4   4  225.08   10.50
   0   4   4  224.98   10.10
   0   4   4  227.08    9.70
   0   4   4  211.38    9.40
  -1  -4  -4 2446.36   84.89
  -1  -4  -4 2430.36   84.99
   1   4   4 2462.15   85.09
   1   4   4 2402.46   85.69
   1   4   4 2306.87   85.99
   1   4   4 2340.17   85.19
   1   4   4 2418.76   85.99
   1   4   4 2453.05   87.99
  -2  -4  -4    5.60    2.90
  -2  -4  -4    1.40    2.50
  -2  -4  -4    3.20    1.80
  -2  -4  -4    1.90    1.90
  -2  -4  -4    3.20    2.10
  -2  -4  -4    2.20    2.40
   2   4   4    4.10    2.20
   2   4   4    3.30    2.40
   2   4   4    2.10    2.40
   2   4   4    3.60    2.10
   2   4   4    0.40    2.60
   2   4   4    0.30    2.50
  -3  -4  -4   90.69    7.30
  -3  -4  -4  101.49    7.70
  -3  -4  -4  107.89    6.60
  -3  -4  -4  111.19    7.40
  -3  -4  -4   97.99    7.50
   3   4   4   97.59    7.90
   3   4   4  120.29    6.70
   3   4   4  108.09    7.80
   3   4   4   93.29    6.60
   3   4   4  102.69    7.60
  -4  -4  -4 1941.11   69.89
  -4  -4  -4 1913.31   70.69
  -4  -4  -4 1964.30   71.79
  -4  -4  -4 1967.90   70.89
  -4  -4  -4 1951.20   69.49
  -4  -4  -4 1910.31   71.99
   4   4   4 1968.10   72.29
   4   4   4 1964.40   70.79
   4   4   4 1916.91   72.29
   4   4   4 1946.91   72.59
   4   4   4 1965.80   70.19
  -5  -4  -4 1609.64   58.89
  -5  -4  -4 1628.24   59.39
  -5  -4  -4 1603.74   58.29
  -5  -4  -4 1612.54   61.09
  -5  -4  -4 1575.24   61.19
  -5  -4  -4 1690.53   60.29
   5   4   4 1646.14   59.99
   5   4   4 1455.65   60.69
   5   4   4 1568.74   58.69
   5   4   4 1620.34   61.89
  -6  -4  -4  957.80   38.30
  -6  -4  -4  975.10   39.80
  -6  -4  -4  938.51   37.40
  -6  -4  -4  983.80   38.40
  -6  -4  -4  990.30   40.80
   6   4   4  975.10   40.70
   6   4   4  991.60   37.90
   6   4   4  986.70   39.50
   6   4   4 1010.90   41.60
  -7  -4  -4  298.27   19.00
  -7  -4  -4  300.67   18.50
  -7  -4  -4  304.57   17.70
  -7  -4  -4  325.87   16.60
  -7  -4  -4  308.47   16.20
   7   4   4  342.17   18.70
   7   4   4  304.87   19.00
   7   4   4  329.07   15.50
   7   4   4  291.57   17.10
  -8  -4  -4  125.19   13.10
  -8  -4  -4  121.49   11.20
  -8  -4  -4  129.99   11.00
  -8  -4  -4  139.49   13.90
   8   4   4  117.69   11.20
   8   4   4  111.79    9.40
   8   4   4  126.19   13.10
  -9  -4  -4   20.40    8.90
  -9  -4  -4   38.90    7.80
  -9  -4  -4   24.30    7.10
   9   4   4   41.20    9.50
   9   4   4   23.20    5.50
   9   4   4   22.40    6.80
 -10  -4  -4   25.20    9.90
 -10  -4  -4   22.00    7.60
 -10  -4  -4   29.70    7.90
  10   4   4   19.50    5.70
  10   4   4   24.00    7.20
 -11  -4  -4   28.20   11.20
 -11  -4  -4   29.50    8.70
 -11  -4  -4    3.60    7.50
  11   4   4   15.60    7.80
  11   4   4   18.00    5.80
  10  -5  -4   84.99   15.50
 -10   5   4   89.29   15.90
 -10   5   4  102.99   15.80
 -10   5   4  133.59   17.00
 -10   5   4  112.29   13.60
   9  -5  -4    9.70    7.00
   9  -5  -4   -2.80    7.50
  -9   5   4    6.00    7.80
  -9   5   4   10.30    8.50
  -9   5   4   12.60    7.50
  -9   5   4   11.80    6.60
   8  -5  -4   58.09   11.00
   8  -5  -4   75.09   12.60
  -8   5   4   63.49   12.10
  -8   5   4   86.49   13.30
  -8   5   4   71.19   10.10
  -8   5   4   66.89   11.20
   7  -5  -4  412.76   23.60
   7  -5  -4  371.36   23.70
  -7   5   4  396.66   21.70
  -7   5   4  397.06   23.80
  -7   5   4  372.36   19.90
  -7   5   4  390.16   22.80
   6  -5  -4  427.56   22.00
   6  -5  -4  339.07   21.80
  -6   5   4  355.76   19.60
  -6   5   4  349.77   20.30
  -6   5   4  370.96   18.40
  -6   5   4  367.96   20.90
   5  -5  -4  111.69   11.70
   5  -5  -4  105.79   10.00
  -5   5   4  103.19    8.20
  -5   5   4  114.49    9.30
  -5   5   4   92.09    9.70
  -5   5   4   77.69    9.40
   4  -5  -4  103.29    9.00
   4  -5  -4  106.29   10.90
  -4   5   4   92.79    7.80
  -4   5   4  104.79    9.10
  -4   5   4   93.59    8.90
  -4   5   4   88.59    6.90
  -4   5   4   99.19    8.50
   3  -5  -4    3.00    4.50
   3  -5  -4    7.90    3.90
  -3   5   4    8.60    3.60
  -3   5   4    7.80    3.00
  -3   5   4    2.30    3.30
  -3   5   4    6.50    3.40
   2  -5  -4   92.89    7.20
   2  -5  -4   85.99    9.00
  -2   5   4   95.79    7.10
  -2   5   4   98.39    6.30
  -2   5   4   93.39    7.10
  -2   5   4   95.39    6.30
   1  -5  -4   78.79    6.00
   1  -5  -4   67.49    8.10
  -1   5   4   77.49    5.70
  -1   5   4   82.19    6.00
  -1   5   4   74.69    5.30
  -1   5   4   71.79    4.70
   0  -5  -4   95.29    5.80
   0   5   4   98.29    6.40
   0   5   4   97.29    5.30
   0   5   4   98.09    5.90
   0   5   4   96.89    5.10
  -1  -5  -4    2.50    1.70
   1   5   4    4.00    2.40
   1   5   4   -1.30    2.20
   1   5   4    2.10    1.90
   1   5   4    1.10    2.00
  -2  -5  -4   67.39    4.30
  -2  -5  -4   71.59    5.30
   2   5   4   82.39    6.50
   2   5   4   75.99    6.30
   2   5   4   59.19    5.70
   2   5   4   80.99    6.50
  -3  -5  -4  352.56   15.40
  -3  -5  -4  331.07   14.00
  -3  -5  -4  329.97   15.30
   3   5   4  345.57   14.30
   3   5   4  337.17   16.30
   3   5   4  327.27   14.50
   3   5   4  298.67   16.00
   3   5   4  352.16   16.20
   3   5   4  348.97   16.00
  -4  -5  -4   10.20    4.00
  -4  -5  -4    5.40    3.30
  -4  -5  -4    9.90    3.20
  -4  -5  -4    9.50    3.60
   4   5   4    5.10    3.80
   4   5   4   14.20    4.10
   4   5   4   17.10    3.80
   4   5   4    3.10    3.70
  -5  -5  -4  256.67   13.60
  -5  -5  -4  276.97   14.90
  -5  -5  -4  248.58   14.90
  -5  -5  -4  296.17   14.30
   5   5   4  261.77   15.20
   5   5   4  296.17   13.60
   5   5   4  289.57   13.90
   5   5   4  284.67   16.30
  -6  -5  -4  640.54   28.50
  -6  -5  -4  589.74   26.20
  -6  -5  -4  634.24   25.80
  -6  -5  -4  589.44   28.40
  -6  -5  -4  648.64   27.60
   6   5   4  673.03   27.40
   6   5   4  631.84   28.80
   6   5   4  618.64   25.90
   6   5   4  628.74   29.60
  -7  -5  -4  164.08   11.20
  -7  -5  -4  154.18   12.60
  -7  -5  -4  156.78   13.30
  -7  -5  -4  166.38   11.40
  -7  -5  -4  175.08   10.30
  -7  -5  -4  172.58   14.10
   7   5   4  179.88   13.30
   7   5   4  165.98   10.70
   7   5   4  164.98   11.70
   7   5   4  171.68   14.40
  -8  -5  -4   -4.20    6.40
  -8  -5  -4   -1.20    4.60
  -8  -5  -4   -2.80    4.40
   8   5   4    5.20    5.70
   8   5   4   -7.00    3.40
   8   5   4   -2.90    4.00
  -9  -5  -4    2.70    5.40
  -9  -5  -4    8.70    7.80
  -9  -5  -4    4.30    5.70
   9   5   4    0.00    4.00
   9   5   4   -0.30    4.90
   9   5   4    1.80    6.10
 -10  -5  -4   14.20    6.90
 -10  -5  -4    7.60    6.40
 -10  -5  -4    1.10    8.10
  10   5   4    9.60    5.10
  10   5   4    0.10    4.90
 -11  -5  -4   46.60   11.70
 -11  -5  -4   20.80    7.90
 -11  -5  -4   22.40    8.20
  11   5   4   16.50    7.80
  11   5   4   43.70    8.70
   9  -6  -4    0.20    6.90
   9  -6  -4    4.50    8.80
  -9   6   4   -1.20    6.10
  -9   6   4   -0.30    7.20
  -9   6   4   -2.90    6.50
  -9   6   4   -3.40    8.40
   8  -6  -4   88.99   14.50
   8  -6  -4   87.09   12.50
  -8   6   4   92.79   14.60
  -8   6   4   82.89   10.70
  -8   6   4   77.99   13.30
  -8   6   4   49.70   11.30
   7  -6  -4   13.90    6.80
   7  -6  -4   11.50    7.70
  -7   6   4   16.40    8.00
  -7   6   4   14.10    5.40
  -7   6   4    9.60    6.50
  -7   6   4   10.10    6.00
   6  -6  -4   97.19   11.40
   6  -6  -4   96.69   13.10
  -6   6   4   91.59    8.90
  -6   6   4  104.29   11.60
  -6   6   4  104.19   11.30
  -6   6   4  117.79   13.20
  -6   6   4   74.79    9.90
   5  -6  -4  100.09   10.40
   5  -6  -4   93.89   11.90
  -5   6   4   93.49    9.00
  -5   6   4   81.99    9.80
  -5   6   4   90.49    7.60
  -5   6   4   60.89    8.70
   4  -6  -4  432.56   21.30
   4  -6  -4  414.06   23.40
  -4   6   4  436.86   20.60
  -4   6   4  429.86   21.00
  -4   6   4  431.46   19.30
  -4   6   4  404.86   19.70
   3  -6  -4   -2.10    4.40
   3  -6  -4    1.40    3.50
  -3   6   4    2.00    3.30
  -3   6   4    3.50    3.00
  -3   6   4    0.70    3.30
  -3   6   4    1.90    2.70
   2  -6  -4   69.39    8.80
   2  -6  -4   71.79    6.60
  -2   6   4   68.89    6.10
  -2   6   4   58.49    4.80
  -2   6   4   62.09    6.00
  -2   6   4   52.59    5.00
   1  -6  -4   74.19    5.90
   1  -6  -4   78.89    9.30
  -1   6   4   86.99    5.70
  -1   6   4   98.59    6.40
   0  -6  -4  282.07   12.50
   0   6   4  320.27   13.40
   0   6   4  310.67   13.00
   1   6   4   19.20    4.30
   1   6   4   20.60    4.00
   1   6   4   29.00    3.30
   1   6   4   16.70    3.30
   2   6   4  164.88    9.40
   2   6   4  189.68   10.20
   2   6   4  179.28   10.10
  -3  -6  -4  355.26   14.20
  -3  -6  -4  351.36   15.10
   3   6   4  346.57   16.80
   3   6   4  366.56   15.00
   3   6   4  345.67   16.60
   3   6   4  355.36   17.20
  -4  -6  -4  160.28    9.20
  -4  -6  -4  183.68   10.50
  -4  -6  -4  182.08   10.60
   4   6   4  182.88   11.60
   4   6   4  197.88   12.40
   4   6   4  181.48    9.70
  -5  -6  -4   25.00    5.50
  -5  -6  -4   37.70    5.50
  -5  -6  -4   30.70    6.30
  -5  -6  -4   18.80    4.50
   5   6   4   24.90    6.00
   5   6   4   31.20    4.80
   5   6   4   26.10    5.30
   5   6   4   31.80    6.70
  -6  -6  -4    7.70    4.80
  -6  -6  -4   -2.80    3.60
  -6  -6  -4   -0.20    4.70
  -6  -6  -4    4.70    4.10
   6   6   4    9.90    4.10
   6   6   4    4.20    5.10
   6   6   4    5.40    4.10
   6   6   4    7.60    3.70
  -7  -6  -4    2.90    5.60
  -7  -6  -4    0.70    4.60
  -7  -6  -4   -6.00    3.80
   7   6   4    3.60    3.70
   7   6   4    0.20    5.40
   7   6   4    1.70    3.90
  -8  -6  -4    5.70    5.10
  -8  -6  -4    5.40    6.60
   8   6   4    5.50    4.50
   8   6   4    3.90    4.90
   8   6   4    2.60    6.00
  -9  -6  -4    6.50    7.50
  -9  -6  -4    1.40    5.40
   9   6   4    3.30    4.60
   9   6   4   -2.80    4.40
   9   6   4    1.10    6.40
 -10  -6  -4  158.28   13.50
 -10  -6  -4  152.08   13.10
 -10  -6  -4  179.68   17.40
  10   6   4  143.89   18.20
  10   6   4  168.98   14.70
  10   6   4  131.19   11.80
 -11  -6  -4   77.79   15.10
 -11  -6  -4   50.99   10.90
  11   6   4   46.00    9.30
  11   6   4   55.79   11.60
   9  -7  -4    4.50    9.50
   9  -7  -4   14.80   13.30
  -9   7   4   17.50    8.60
  -9   7   4   22.40   10.00
   8  -7  -4    7.00    8.90
   8  -7  -4    7.60    7.10
  -8   7   4    6.20    7.00
  -8   7   4    5.50    6.90
  -8   7   4    3.40    7.80
   7  -7  -4   17.70    8.90
   7  -7  -4    7.30    6.20
  -7   7   4    5.10    7.50
  -7   7   4    7.50    5.90
  -7   7   4   15.90    5.80
   6  -7  -4   -6.10    4.60
   6  -7  -4    8.70    7.70
  -6   7   4   -4.30    6.50
  -6   7   4   -0.10    4.50
  -6   7   4    0.90    5.10
  -6   7   4    0.40    4.00
  -6   7   4   -9.40    4.90
   5  -7  -4   -5.80    4.20
   5  -7  -4    5.60    6.90
  -5   7   4    3.40    4.80
  -5   7   4   -4.40    3.80
  -5   7   4    6.30    4.90
   4  -7  -4   82.79   12.10
   4  -7  -4   70.89    8.80
  -4   7   4   87.59    8.20
  -4   7   4   91.49    9.10
  -4   7   4  113.29    9.80
  -4   7   4   97.39    8.10
   3  -7  -4   28.60    6.00
   3  -7  -4   13.70    7.00
  -3   7   4   29.00    4.90
  -3   7   4   23.20    5.60
  -3   7   4   20.20    4.70
  -3   7   4   20.60    4.80
   2  -7  -4   67.99    6.50
   2  -7  -4   52.59    9.40
  -2   7   4   56.19    6.00
  -2   7   4   63.29    5.30
  -2   7   4   59.89    6.20
   1  -7  -4   54.19    9.00
   1  -7  -4   52.09    5.10
  -1   7   4   52.89    5.20
  -1   7   4   48.90    4.60
   0  -7  -4    2.70    1.80
   0   7   4    0.90    2.40
   0   7   4    7.00    2.40
   1   7   4  553.34   21.90
   1   7   4  510.25   20.60
   1   7   4  562.34   22.20
   2   7   4   63.69    6.50
   2   7   4   68.29    5.80
   2   7   4   57.99    6.50
   3   7   4  227.08   12.70
   3   7   4  243.08   13.30
   3   7   4  255.37   13.70
  -4  -7  -4  559.34   21.70
   4   7   4  553.94   25.10
   4   7   4  548.85   22.70
   4   7   4  577.84   25.80
  -5  -7  -4  224.38   11.80
  -5  -7  -4  239.78   16.30
   5   7   4  215.48   12.10
   5   7   4  234.28   15.30
   5   7   4  248.18   14.70
  -6  -7  -4  256.77   12.50
  -6  -7  -4  251.37   13.90
  -6  -7  -4  252.57   13.80
  -6  -7  -4  242.98   15.00
   6   7   4  262.27   17.30
   6   7   4  262.17   13.80
   6   7   4  229.98   15.90
   6   7   4  269.67   13.60
  -7  -7  -4  813.82   33.80
  -7  -7  -4  799.32   32.80
  -7  -7  -4  752.22   32.30
   7   7   4  820.72   37.50
   7   7   4  749.82   32.40
   7   7   4  806.62   33.30
  -8  -7  -4   37.00    7.60
  -8  -7  -4   40.50    8.10
   8   7   4   31.40    7.10
   8   7   4   39.90    7.90
   8   7   4   33.30    9.00
  -9  -7  -4   59.19   11.10
   9   7   4   49.90    9.20
   9   7   4   37.10    8.20
   9   7   4   39.70   10.80
 -10  -7  -4  473.65   25.10
  10   7   4  371.56   20.90
  10   7   4  380.86   26.70
   8  -8  -4   27.50    8.90
   8  -8  -4   13.20   10.50
  -8   8   4   23.60    8.60
  -8   8   4   30.80   10.90
   7  -8  -4  155.18   18.40
   7  -8  -4  176.38   15.80
  -7   8   4  151.78   17.50
  -7   8   4  146.49   13.80
   6  -8  -4  225.58   16.30
   6  -8  -4  200.78   19.30
  -6   8   4  215.88   18.40
  -6   8   4  188.88   14.20
   5  -8  -4   87.39   14.20
   5  -8  -4  114.89   11.50
  -5   8   4  109.69   13.60
  -5   8   4   90.79   10.80
  -5   8   4  104.29    9.80
   4  -8  -4  279.57   16.00
   4  -8  -4  243.88   19.50
  -4   8   4  252.87   13.60
  -4   8   4  198.18   14.40
  -4   8   4  307.47   15.80
   3  -8  -4   35.60    6.50
   3  -8  -4   36.10    9.50
  -3   8   4   33.50    6.30
  -3   8   4   24.40    5.20
  -3   8   4   21.20    4.30
  -3   8   4   27.70    5.00
   2  -8  -4  647.24   32.80
   2  -8  -4  644.44   26.90
  -2   8   4  626.34   26.60
  -2   8   4  677.13   26.50
  -2   8   4  666.63   25.50
   1  -8  -4  576.04   22.80
   1  -8  -4  568.24   29.30
  -1   8   4  569.24   22.40
  -1   8   4  586.54   23.00
   0   8   4    4.70    2.50
   0   8   4    1.90    2.60
   1   8   4  335.17   15.30
   1   8   4  331.07   15.00
   2   8   4  257.17   12.80
   2   8   4  286.27   14.10
   2   8   4  266.17   13.70
   3   8   4  538.75   24.20
   3   8   4  554.84   24.50
   4   8   4  321.77   17.80
   4   8   4  334.47   15.60
   4   8   4  375.66   18.90
  -5  -8  -4   24.40    4.30
   5   8   4   33.60    6.20
   5   8   4   17.90    5.70
   5   8   4   46.50    8.90
   6   8   4   12.20    6.30
   6   8   4    9.90    4.40
  -7  -8  -4  232.08   14.10
   7   8   4  220.58   15.00
   7   8   4  211.38   13.40
   7   8   4  226.88   18.00
  -8  -8  -4   91.89    8.70
   8   8   4  107.79   14.60
   8   8   4   99.19    9.80
  -9  -8  -4    6.10    5.80
   9   8   4   -3.60    7.10
   9   8   4   -6.50    4.70
 -10  -8  -4   52.99   10.60
  10   8   4   18.60    6.70
  10   8   4   40.10   11.70
   7  -9  -4  197.98   17.00
   7  -9  -4  161.48   20.40
  -7   9   4  168.78   18.90
  -7   9   4  176.48   15.30
   6  -9  -4  208.18   21.10
   6  -9  -4  230.38   17.20
  -6   9   4  192.58   19.00
  -6   9   4  230.88   15.60
   5  -9  -4  112.49   11.70
   5  -9  -4  130.99   16.80
  -5   9   4  101.89   14.80
  -5   9   4  104.19   10.10
  -5   9   4   99.59   11.40
   4  -9  -4  242.08   15.60
   4  -9  -4  230.68   20.00
  -4   9   4  280.77   15.70
  -4   9   4  253.57   13.70
   3  -9  -4   77.69    8.60
   3  -9  -4   95.99   14.00
  -3   9   4  110.99    9.10
  -3   9   4   85.99    7.40
   2  -9  -4    2.40    3.40
   2  -9  -4    4.30    6.90
  -2   9   4    0.80    2.70
  -2   9   4    1.20    3.50
  -2   9   4   -2.90    3.20
   1  -9  -4    4.10    2.30
   0   9   4  129.59    7.90
   0   9   4  128.79    8.50
   1   9   4   72.59    6.80
   1   9   4   81.29    7.50
   2   9   4  162.68   10.40
   2   9   4  147.29    9.60
   2   9   4  162.28   10.70
   3   9   4  172.98   12.30
   3   9   4  197.68   12.40
   4   9   4  225.98   14.10
   4   9   4  190.08   14.10
   5   9   4  159.48   13.90
   5   9   4  174.88   11.00
   5   9   4  180.18   17.20
   6   9   4   -0.90    4.20
   6   9   4   -2.10    5.70
   7   9   4   14.30    7.90
   7   9   4   14.30    5.20
   8   9   4   27.10    9.60
   8   9   4   17.10    6.00
   9   9   4   41.00   10.90
   9   9   4   33.20    7.30
   6 -10  -4   74.39   16.70
  -6  10   4   60.59   14.30
  -6  10   4   50.39   10.40
   5 -10  -4    0.40    9.00
  -5  10   4   10.00    5.30
  -5  10   4    0.10    7.60
   4 -10  -4   11.50    9.30
  -4  10   4   -2.20    6.80
  -4  10   4    4.50    4.30
  -4  10   4    3.30    5.00
   3 -10  -4   10.00    8.90
  -3  10   4    9.20    3.80
  -3  10   4    9.10    4.70
   2 -10  -4   43.80   11.20
  -2  10   4   49.50    5.60
   1  10   4    9.50    4.30
   1  10   4   10.00    4.00
   2  10   4  113.89    9.30
   2  10   4   98.99    9.20
   3  10   4    2.80    4.60
   3  10   4   -3.80    4.00
   4  10   4   30.90    6.70
   4  10   4   29.50    7.00
   5  10   4    9.20    6.30
   6  10   4   20.90    8.10
   6  10   4   15.10    6.20
   7  10   4   60.19   12.90
   7  10   4   37.60    8.20
   8  10   4  180.48   18.30
   8  10   4  126.29   11.70
   5 -11  -4  -22.50    8.40
  -5  11   4    2.50    5.00
  -5  11   4    0.40    8.40
   4 -11  -4   28.30   12.20
  -4  11   4   40.70   10.20
  -4  11   4   35.80    8.80
  -4  11   4   23.90    5.80
   3 -11  -4   31.60   11.70
  -3  11   4   42.70    6.50
  -3  11   4   49.40    8.10
  -3  11   4   37.80    9.50
   1  11   4   65.19    7.50
   1  11   4   61.99    7.80
   2  11   4  129.09   10.70
   2  11   4  156.58   11.30
   3  11   4  397.76   20.50
   3  11   4  398.96   20.30
   4  11   4  282.67   17.90
   5  11   4  115.49   13.30
   6  11   4   13.80    8.10
   7  11   4   -0.80    7.90
  -3  12   4  139.19   15.70
  -2  12   4   87.59   13.20
  -1  12   4   22.10    7.90
   1  12   4  122.09    9.60
   1  12   4  123.59   10.20
   2  12   4   96.29   10.00
   2  12   4  105.39   10.30
   3  12   4   52.69    9.50
   4  12   4  114.19   12.70
   5  12   4  113.29   13.90
   1  13   4   41.30    7.00
   1  13   4   23.70    5.60
   2  13   4    1.90    5.00
   4  11  -5   17.50    8.20
   3  11  -5   24.00    8.50
   2  11  -5   -5.10    5.70
   1  11  -5    8.10    6.00
   0  11  -5   -0.60    4.50
   0  11  -5   -4.80    4.80
  -1  11  -5   43.80    7.30
  -3  11  -5   21.00    6.10
   6  10  -5    6.40    7.90
   5  10  -5   43.90   10.60
   4  10  -5   39.20    9.50
   3  10  -5    2.90    6.10
   2  10  -5   13.60    7.70
   2  10  -5   35.70    7.60
   1  10  -5   66.29    8.30
   1  10  -5   60.19    9.00
   0  10  -5   33.70    7.70
   0  10  -5   44.60    7.20
  -1  10  -5  234.18   14.10
  -1  10  -5  249.97   13.00
  -2  10  -5   78.69    8.80
  -3  10  -5   19.10    7.20
  -3  10  -5   24.20    6.00
  -3  10  -5   26.20    5.60
   3 -10   5   52.49   12.10
  -4  10  -5   67.99    8.80
  -4  10  -5   60.49   11.70
  -4  10  -5   55.59    9.10
   4 -10   5   58.99   13.60
  -5  10  -5  105.69   11.70
  -5  10  -5  123.09   14.40
   5 -10   5  104.19   16.10
   7   9  -5  102.19   10.70
   7   9  -5  144.59   17.40
   6   9  -5   41.80   10.30
   6   9  -5   38.60    8.10
   5   9  -5  222.18   18.10
   4   9  -5  227.88   17.70
   3   9  -5  365.26   21.10
   2   9  -5   35.30    8.60
   2   9  -5   48.90    7.70
   1   9  -5   28.60    6.40
   1   9  -5   23.00    5.90
   0   9  -5    2.90    4.20
   0   9  -5    3.20    3.80
  -1   9  -5   24.10    5.90
  -1   9  -5   36.00    6.90
  -1   9  -5   23.80    5.30
  -2   9  -5  215.48   12.10
  -2   9  -5  196.68   11.10
  -2   9  -5  170.58   12.60
   2  -9   5  178.18   15.20
  -3   9  -5  363.86   17.00
  -3   9  -5  372.26   19.80
  -3   9  -5  345.07   17.70
   3  -9   5  365.86   22.50
  -4   9  -5   66.49    8.60
  -4   9  -5   56.99   11.40
  -4   9  -5   62.19    8.90
   4  -9   5   75.29   12.70
  -5   9  -5   81.39   10.30
  -5   9  -5   78.09    9.90
  -5   9  -5   66.99   12.30
   5  -9   5   81.59   14.10
  -6   9  -5   71.99   13.80
  -6   9  -5   69.49   11.10
   6  -9   5   63.49   14.50
  -7   9  -5   53.19   12.40
  -7   9  -5   55.89   11.60
   7  -9   5   61.29   14.70
   8   8  -5   71.99    9.80
   8   8  -5  102.89   16.60
   7   8  -5  127.69   10.90
   7   8  -5  164.68   17.70
   6   8  -5   92.79   14.20
   6   8  -5   92.59    9.30
   5   8  -5  335.97   21.80
   5   8  -5  352.16   18.90
   5   8  -5  311.27   16.30
   4   8  -5   45.90   10.30
   4   8  -5   48.90    6.60
   4   8  -5   43.70    7.40
   3   8  -5  143.39   11.30
   3   8  -5  145.99   13.00
   3   8  -5  148.09   10.10
   2   8  -5  155.08   10.30
   2   8  -5  164.98   12.40
   2   8  -5  152.88   10.90
   1   8  -5  163.18   10.20
   1   8  -5  143.39   11.10
   0   8  -5  340.57   15.40
   0   8  -5  309.07   15.80
   0   8  -5  311.77   14.50
   0   8  -5  326.37   16.30
  -1   8  -5  139.29   10.40
  -1   8  -5  153.58    9.20
  -1   8  -5  164.68   10.20
  -1   8  -5  139.79   10.00
  -2   8  -5    3.00    4.60
  -2   8  -5    8.90    3.80
  -2   8  -5   12.40    4.20
  -2   8  -5   14.30    4.90
   2  -8   5   11.10    6.10
  -3   8  -5  157.28   11.00
  -3   8  -5  164.78   12.50
  -3   8  -5  180.08   10.60
  -3   8  -5  153.48   12.20
   3  -8   5  178.88   14.70
  -4   8  -5  102.79    9.90
  -4   8  -5  133.19   12.40
  -4   8  -5  114.79    9.60
   4  -8   5  121.49   13.60
  -5   8  -5   62.09   11.50
  -5   8  -5   37.90    8.90
  -5   8  -5   52.09    8.80
   5  -8   5   58.59   11.70
  -6   8  -5   -0.70    5.90
  -6   8  -5   -8.30    6.70
   6  -8   5   -6.30    7.10
  -7   8  -5    1.00    7.00
  -7   8  -5    7.10    8.10
   7  -8   5    4.50    8.60
  -8   8  -5   24.90   10.50
  -8   8  -5   35.30    9.90
   8  -8   5   17.70    9.90
   9   7  -5   -1.90    4.80
   9   7  -5   11.90    9.70
   8   7  -5   31.70    8.10
   8   7  -5   14.60    9.30
   8   7  -5   13.90    5.80
  -8  -7   5   30.90    8.50
   7   7  -5    2.10    4.50
   7   7  -5   17.10    6.60
   7   7  -5    7.60    7.20
   6   7  -5  113.79   14.50
   6   7  -5  142.89   12.30
   6   7  -5  132.99   10.10
   5   7  -5   34.60    6.80
   5   7  -5   43.00    9.50
   5   7  -5   47.50    8.20
   4   7  -5   14.40    3.90
   4   7  -5   11.80    5.00
   4   7  -5   10.40    6.10
   4   7  -5   10.20    5.30
   3   7  -5   30.80    6.30
   3   7  -5   27.60    5.80
   3   7  -5   23.10    4.90
   3   7  -5   28.20    6.10
   3   7  -5   17.80    6.40
   2   7  -5   15.60    4.60
   2   7  -5    6.20    4.10
   2   7  -5   10.00    4.10
   2   7  -5   13.80    5.20
   1   7  -5   13.10    4.10
   1   7  -5   15.00    4.10
   1   7  -5   22.50    4.80
   1   7  -5   10.80    4.50
   0   7  -5    2.50    3.70
   0   7  -5    1.80    3.30
   0   7  -5    1.50    3.50
   0   7  -5    1.30    2.90
   0   7  -5    2.20    3.10
  -1   7  -5    4.50    3.40
  -1   7  -5    2.60    3.10
  -1   7  -5    2.00    3.40
  -1   7  -5   -1.90    2.90
   1  -7   5   -2.00    3.90
  -2   7  -5   56.69    6.50
  -2   7  -5   59.39    7.60
  -2   7  -5   63.39    7.10
  -2   7  -5   52.29    6.00
   2  -7   5   46.50    8.20
  -3   7  -5   86.99    9.50
  -3   7  -5   95.89    9.90
  -3   7  -5   82.29    8.00
  -3   7  -5   80.69    7.50
   3  -7   5   90.29   10.60
  -4   7  -5   10.50    4.60
  -4   7  -5    4.00    4.20
  -4   7  -5    2.40    5.50
   4  -7   5    8.90    6.40
  -5   7  -5    0.60    5.90
  -5   7  -5    2.30    4.40
  -5   7  -5    0.60    4.80
   5  -7   5    1.10    6.10
  -6   7  -5    7.10    5.90
  -6   7  -5   17.60    7.90
  -6   7  -5    3.40    5.00
   6  -7   5    9.80    7.60
  -7   7  -5    9.20    6.90
  -7   7  -5   14.60    8.50
   7  -7   5   21.30    9.40
  -8   7  -5   82.39   13.70
  -8   7  -5  105.99   15.10
   8  -7   5   80.99   14.20
  -9   7  -5   39.80   10.60
  -9   7  -5   37.90   11.40
   9  -7   5   42.80   12.30
   9   6  -5    1.80    4.90
   9   6  -5    3.20    8.80
   9   6  -5   -0.90    5.50
  -9  -6   5    6.30    5.80
   8   6  -5    8.10    5.20
   8   6  -5   13.30    8.20
   8   6  -5   13.10    6.10
  -8  -6   5   10.40    5.70
   7   6  -5   35.00    7.40
   7   6  -5   52.29   12.40
   7   6  -5   37.50    8.70
  -7  -6   5   41.60    7.70
   6   6  -5   -1.70    3.50
   6   6  -5    2.20    6.40
   6   6  -5   -1.50    4.30
  -6  -6   5   -2.40    3.20
   5   6  -5  527.05   30.00
   5   6  -5  520.15   21.90
   5   6  -5  478.95   26.70
   5   6  -5  502.55   24.20
  -5  -6   5  509.45   30.10
   4   6  -5  132.39   12.60
   4   6  -5  135.19    8.80
   4   6  -5  126.89   10.30
   4   6  -5  142.09   11.10
   3   6  -5  353.16   16.90
   3   6  -5  322.47   15.80
   3   6  -5  335.47   14.60
   3   6  -5  315.77   16.90
   3   6  -5  324.77   18.40
   2   6  -5  168.18   10.20
   2   6  -5  174.38   10.90
   2   6  -5  202.48   12.70
   2   6  -5  187.78   11.10
   1   6  -5  742.63   29.70
   1   6  -5  776.32   31.50
   1   6  -5  780.22   30.00
   1   6  -5  757.62   30.30
   0   6  -5  181.28   10.60
   0   6  -5  188.28    9.90
   0   6  -5  171.48    9.80
  -1   6  -5  267.27   13.40
  -1   6  -5  276.77   14.30
  -1   6  -5  278.67   12.80
  -1   6  -5  272.17   13.30
   1  -6   5  284.77   14.60
  -2   6  -5  223.58   12.90
  -2   6  -5  259.77   13.90
  -2   6  -5  242.08   12.50
  -2   6  -5  256.07   12.00
   2  -6   5  245.88   14.30
  -3   6  -5   43.00    7.00
  -3   6  -5   42.40    6.30
  -3   6  -5   39.30    7.20
  -3   6  -5   48.20    6.10
   3  -6   5   42.10    7.90
  -4   6  -5  255.07   13.40
  -4   6  -5  258.07   13.80
  -4   6  -5  235.58   15.50
  -4   6  -5  208.38   14.40
   4  -6   5  219.98   15.20
  -5   6  -5  117.29   10.30
  -5   6  -5  135.79   12.70
  -5   6  -5  113.59   10.50
   5  -6   5  125.59   12.40
  -6   6  -5   57.99    8.80
  -6   6  -5   47.80    9.40
  -6   6  -5   50.39   10.60
  -6   6  -5   58.99    9.00
   6  -6   5   41.30   10.00
  -7   6  -5  236.68   14.00
  -7   6  -5  248.08   17.40
  -7   6  -5  247.68   18.50
   7  -6   5  286.07   19.00
   7  -6   5  238.98   18.50
  -8   6  -5   55.39   12.10
  -8   6  -5   75.59   12.90
  -8   6  -5   73.39   13.80
   8  -6   5   62.29   12.40
   8  -6   5   83.39   12.70
  -9   6  -5   41.10   10.90
  -9   6  -5   44.10   11.00
   9  -6   5   50.39   12.20
   9  -6   5   59.89   12.10
  10   5  -5    9.80    5.50
  10   5  -5    4.20    6.90
 -10  -5   5    7.60    5.80
 -10  -5   5    4.90    7.40
   9   5  -5    4.20    6.20
   9   5  -5   11.70    5.20
   9   5  -5   13.60    8.90
  -9  -5   5   14.40    7.30
  -9  -5   5   21.10    5.90
   8   5  -5   74.39    8.80
   8   5  -5  108.59   14.70
   8   5  -5   67.19   10.20
  -8  -5   5   89.29   11.40
   7   5  -5  529.95   26.60
   7   5  -5  525.35   23.00
   7   5  -5  462.45   28.10
  -7  -5   5  498.85   24.80
   6   5  -5   13.80    4.40
   6   5  -5   11.50    5.40
   6   5  -5   16.70    7.20
  -6  -5   5   13.00    5.20
   5   5  -5   84.09    9.30
   5   5  -5   88.69    7.20
   5   5  -5   53.59    8.40
   5   5  -5   85.19   11.40
  -5  -5   5   76.29    7.30
  -5  -5   5   80.19    8.80
   4   5  -5 1313.67   49.80
   4   5  -5 1239.58   49.60
   4   5  -5 1262.67   46.80
   4   5  -5 1297.37   51.59
  -4  -5   5 1252.47   48.70
  -4  -5   5 1207.48   46.20
   3   5  -5  158.18   10.40
   3   5  -5  135.69    9.80
   3   5  -5  143.89    8.20
   3   5  -5  147.29   11.60
  -3  -5   5  127.19    8.70
   2   5  -5   92.39    7.90
   2   5  -5  104.19    9.20
   2   5  -5   88.79    6.70
   2   5  -5  107.79    8.10
   2   5  -5   93.39    7.70
  -2  -5   5  113.29    6.60
   1   5  -5 1037.30   39.00
   1   5  -5 1009.00   37.90
   1   5  -5 1056.19   39.60
   1   5  -5 1086.49   41.20
   1   5  -5 1075.19   40.00
  -1  -5   5 1053.49   38.10
   0   5  -5   82.39    5.60
   0   5  -5   73.09    6.20
   0   5  -5   74.49    6.90
   0   5  -5   65.79    5.40
   0  -5   5   80.79    5.80
  -1   5  -5  761.52   29.90
  -1   5  -5  729.33   30.90
  -1   5  -5  761.92   30.30
  -1   5  -5  794.92   29.60
   1  -5   5  798.62   30.70
  -2   5  -5   85.39    6.90
  -2   5  -5   80.79    6.40
  -2   5  -5   86.89    7.50
  -2   5  -5   87.59    7.70
   2  -5   5   87.39    7.70
  -3   5  -5   42.50    6.80
  -3   5  -5   47.30    5.80
  -3   5  -5   37.40    6.40
  -3   5  -5   46.10    6.20
   3  -5   5   49.99    7.00
  -4   5  -5   17.80    4.80
  -4   5  -5   11.80    4.80
  -4   5  -5   19.50    4.80
  -4   5  -5   14.80    5.20
   4  -5   5   13.60    5.20
  -5   5  -5 1111.19   46.00
  -5   5  -5 1146.09   45.00
  -5   5  -5 1157.28   45.00
   5  -5   5 1098.49   46.10
  -6   5  -5  194.28   14.60
  -6   5  -5  123.19   12.00
  -6   5  -5  163.88   12.10
  -6   5  -5  157.78   12.70
   6  -5   5  160.18   13.40
   6  -5   5  159.28   13.40
  -7   5  -5  110.39   13.10
  -7   5  -5   98.39    9.20
  -7   5  -5   88.99   11.30
  -7   5  -5  109.39   12.20
   7  -5   5   97.89   11.70
   7  -5   5   97.49   11.40
  -8   5  -5   61.89   12.60
  -8   5  -5   47.30    9.00
  -8   5  -5   64.29   11.90
  -8   5  -5   80.79   12.70
   8  -5   5   76.09   11.60
   8  -5   5   74.19   12.30
  -9   5  -5    6.40    8.90
  -9   5  -5   15.50    8.80
  -9   5  -5   10.00    8.00
  -9   5  -5   12.70    7.00
   9  -5   5   10.80    7.90
   9  -5   5   16.50    8.10
 -10   5  -5   -2.70    8.50
 -10   5  -5    7.00    9.60
 -10   5  -5   18.00    7.70
  10  -5   5    8.40    8.70
  10   4  -5   94.69   10.40
  10   4  -5   95.29   13.80
 -10  -4   5   85.19   11.40
 -10  -4   5  156.58   16.60
   9   4  -5  189.78   12.90
   9   4  -5  191.18   16.20
  -9  -4   5  173.68   16.70
  -9  -4   5  211.48   14.50
   8   4  -5  464.45   25.80
   8   4  -5  468.65   21.60
   8   4  -5  396.36   26.60
  -8  -4   5  457.95   22.40
  -8  -4   5  469.75   20.90
  -8  -4   5  461.15   25.30
   7   4  -5  104.79    8.80
   7   4  -5   90.69   11.30
   7   4  -5   94.99   13.10
  -7  -4   5   95.99    7.90
  -7  -4   5  107.19   11.60
  -7  -4   5   96.99    9.20
   6   4  -5   12.40    5.80
   6   4  -5   13.10    4.30
   6   4  -5   21.60    7.30
   6   4  -5    9.40    5.00
  -6  -4   5   19.70    3.90
  -6  -4   5   10.10    5.20
  -6  -4   5   14.60    5.40
  -6  -4   5   13.20    3.40
  -6  -4   5   12.50    4.20
   5   4  -5   28.90    6.40
   5   4  -5   15.80    5.00
   5   4  -5   22.60    4.40
   5   4  -5   17.40    6.30
  -5  -4   5   30.30    6.60
  -5  -4   5   22.10    3.90
  -5  -4   5   13.90    3.20
  -5  -4   5   18.10    4.10
  -5  -4   5   24.60    5.30
   4   4  -5  200.78   13.00
   4   4  -5  196.88   12.70
   4   4  -5  247.58   11.30
   4   4  -5  212.88   14.60
  -4  -4   5  205.28   12.50
  -4  -4   5  227.58   11.90
   3   4  -5  464.75   21.60
   3   4  -5  458.45   22.90
   3   4  -5  507.65   19.60
   3   4  -5  513.05   22.00
  -3  -4   5  465.45   19.60
  -3  -4   5  492.35   21.20
   2   4  -5  645.14   28.80
   2   4  -5  701.83   28.10
   2   4  -5  676.43   28.10
   2   4  -5  671.63   27.90
   2   4  -5  696.63   25.80
  -2  -4   5  702.43   27.00
   1   4  -5   97.69    6.80
   1   4  -5   91.69    6.90
   1   4  -5   84.79    5.50
   1   4  -5  102.69    8.00
  -1  -4   5   88.69    5.10
  -1  -4   5   92.59    5.80
   0   4  -5   43.50    4.40
   0   4  -5   52.09    5.10
   0   4  -5   46.10    5.60
   0   4  -5   40.80    3.80
   0  -4   5   45.90    4.50
  -1   4  -5   65.39    5.70
  -1   4  -5   70.59    6.20
  -1   4  -5   72.79    5.60
   1  -4   5   75.89    6.00
   1  -4   5   73.69    5.80
  -2   4  -5  676.03   28.00
  -2   4  -5  720.03   27.40
  -2   4  -5  673.83   28.80
  -2   4  -5  707.53   27.90
  -2   4  -5  709.53   27.40
   2  -4   5  714.73   28.20
  -3   4  -5  295.37   14.80
  -3   4  -5  299.37   14.40
  -3   4  -5  296.77   15.20
  -3   4  -5  304.87   16.00
   3  -4   5  324.87   15.30
  -4   4  -5  484.45   20.90
  -4   4  -5  417.06   21.10
  -4   4  -5  484.05   22.50
  -4   4  -5  475.65   21.10
   4  -4   5  444.46   21.00
  -5   4  -5   -4.30    3.90
  -5   4  -5   -4.20    3.50
  -5   4  -5   -2.40    3.70
   5  -4   5   -1.90    3.50
   5  -4   5    3.70    4.10
  -6   4  -5  313.17   17.40
  -6   4  -5  295.17   17.80
  -6   4  -5  288.97   14.70
  -6   4  -5  291.87   16.60
  -6   4  -5  322.37   17.80
   6  -4   5  285.07   17.10
   6  -4   5  303.67   18.20
  -7   4  -5   -4.50    4.20
  -7   4  -5   -9.50    5.00
  -7   4  -5   -0.10    5.50
  -7   4  -5   -0.10    5.00
  -7   4  -5    0.00    5.70
   7  -4   5   -3.00    5.10
   7  -4   5    5.30    5.50
  -8   4  -5   -0.30    6.00
  -8   4  -5    5.80    6.40
  -8   4  -5   -0.40    6.80
  -8   4  -5    0.40    5.00
   8  -4   5    6.30    6.30
   8  -4   5    6.90    6.00
  -9   4  -5   27.70    9.20
  -9   4  -5   25.60    9.20
  -9   4  -5   33.00    9.40
  -9   4  -5   26.30    7.70
   9  -4   5   30.00    9.00
   9  -4   5   46.40   11.00
 -10   4  -5    6.90    6.80
 -10   4  -5  -10.40    7.30
 -10   4  -5    0.30    8.90
 -10   4  -5   -3.80    7.80
  10  -4   5   -6.80    7.10
  10  -4   5   -7.70    8.00
  10   3  -5    8.70    6.80
  10   3  -5    8.70    4.80
 -10  -3   5    7.60    6.20
 -10  -3   5    2.30    7.00
   9   3  -5   43.60    7.70
   9   3  -5   57.09   11.00
  -9  -3   5   64.29    9.30
  -9  -3   5   44.90    9.40
  -9  -3   5   40.10    9.50
   8   3  -5   45.40    9.40
   8   3  -5   41.10    7.20
   8   3  -5   31.70    9.20
  -8  -3   5   44.70    8.50
  -8  -3   5   38.90    8.90
  -8  -3   5   44.00    7.80
   7   3  -5   -2.40    4.30
   7   3  -5   -0.30    5.50
   7   3  -5    1.50    3.40
  -7  -3   5    3.90    5.40
  -7  -3   5    0.20    4.90
  -7  -3   5   -1.50    3.80
  -7  -3   5    3.50    3.90
   6   3  -5  315.77   15.30
   6   3  -5  322.37   20.20
   6   3  -5  317.97   18.20
   6   3  -5  302.07   18.20
  -6  -3   5  335.87   18.60
  -6  -3   5  320.87   16.50
  -6  -3   5  330.07   15.50
  -6  -3   5  298.67   18.20
   5   3  -5   53.59    7.70
   5   3  -5   66.29    6.10
   5   3  -5   50.89    7.40
   5   3  -5   53.59    9.20
  -5  -3   5   49.90    5.50
  -5  -3   5   39.90    6.00
  -5  -3   5   47.20    7.60
  -5  -3   5   66.09    5.50
  -5  -3   5   52.99    7.60
   4   3  -5  499.95   22.10
   4   3  -5  456.05   23.00
   4   3  -5  453.65   21.30
   4   3  -5  460.35   19.00
  -4  -3   5  436.96   20.70
  -4  -3   5  457.85   18.30
  -4  -3   5  440.46   19.20
  -4  -3   5  448.56   21.20
   3   3  -5   14.30    4.70
   3   3  -5   14.30    4.10
   3   3  -5   19.30    4.90
   3   3  -5    8.60    2.80
   3   3  -5   12.20    3.90
  -3  -3   5   16.00    4.10
  -3  -3   5   12.30    2.60
  -3  -3   5   10.10    3.40
   2   3  -5  188.58   10.60
   2   3  -5  197.48   11.90
   2   3  -5  174.28   10.70
   2   3  -5  198.28   11.00
   2   3  -5  195.48    8.90
  -2  -3   5  199.48    9.50
  -2  -3   5  183.58    8.30
  -2  -3   5  176.38   10.10
   1   3  -5    7.60    3.10
   1   3  -5    3.90    2.50
   1   3  -5   -0.50    2.00
   1   3  -5    3.70    1.80
   1   3  -5    5.40    3.20
   1   3  -5    4.10    2.60
  -1  -3   5    4.70    1.90
  -1  -3   5    9.30    2.80
  -1  -3   5    5.40    2.70
   0   3  -5   14.00    3.70
   0   3  -5   12.20    2.80
   0   3  -5   14.60    3.20
   0  -3   5   17.30    3.20
   0  -3   5    9.90    2.40
   0  -3   5   12.00    2.70
  -1   3  -5   57.09    5.10
  -1   3  -5   58.79    5.70
  -1   3  -5   45.60    5.00
   1  -3   5   60.69    4.40
   1  -3   5   63.19    5.20
   1  -3   5   53.79    4.10
   1  -3   5   56.89    4.50
  -2   3  -5    3.60    3.00
  -2   3  -5    0.30    2.70
  -2   3  -5    0.20    2.50
  -2   3  -5   -2.10    2.70
   2  -3   5    0.90    1.80
   2  -3   5    1.60    2.40
  -3   3  -5   58.29    6.60
  -3   3  -5   55.29    6.50
  -3   3  -5   74.19    6.90
  -3   3  -5   57.99    6.10
   3  -3   5   62.19    4.70
   3  -3   5   56.09    5.70
  -4   3  -5  124.69    9.80
  -4   3  -5  151.58   11.00
  -4   3  -5  160.38   10.00
  -4   3  -5  146.49   10.10
   4  -3   5  137.69    8.00
  -5   3  -5  539.95   24.90
  -5   3  -5  555.44   24.90
  -5   3  -5  516.85   24.50
  -5   3  -5  563.34   22.50
  -5   3  -5  570.54   24.40
  -5   3  -5  510.25   25.50
   5  -3   5  583.54   26.00
   5  -3   5  558.24   22.80
  -6   3  -5  104.59   10.70
  -6   3  -5  124.19   11.10
  -6   3  -5  115.79   10.90
  -6   3  -5  122.39    8.90
  -6   3  -5  128.99   10.90
   6  -3   5  116.19   10.80
   6  -3   5  117.59    8.80
  -7   3  -5   14.50    6.30
  -7   3  -5   16.70    6.10
  -7   3  -5   15.60    5.40
  -7   3  -5   11.00    6.00
  -7   3  -5   15.10    6.50
   7  -3   5   11.20    4.40
   7  -3   5   15.00    6.00
  -8   3  -5  615.14   31.40
  -8   3  -5  676.43   32.30
  -8   3  -5  633.44   28.90
  -8   3  -5  668.13   31.60
   8  -3   5  617.84   32.00
  -9   3  -5  187.28   14.60
  -9   3  -5  219.88   17.60
  -9   3  -5  217.08   17.90
  -9   3  -5  204.38   17.70
   9  -3   5  177.08   16.20
 -10   3  -5  280.37   22.30
 -10   3  -5  242.98   18.10
 -10   3  -5  265.17   21.70
 -10   3  -5  321.57   22.10
  10  -3   5  280.07   21.10
 -11   3  -5  285.37   20.40
 -11   3  -5  369.76   24.70
 -11   3  -5  261.97   23.80
 -11   3  -5  310.87   24.70
  11  -3   5  277.87   21.60
  10   2  -5   -1.30    5.80
  10   2  -5    2.10    4.40
 -10  -2   5   10.20    6.40
 -10  -2   5   -8.50    4.90
 -10  -2   5   -1.90    7.40
   9   2  -5  109.39    9.80
   9   2  -5   94.19   12.40
  -9  -2   5  128.19   12.00
  -9  -2   5  136.59   15.40
  -9  -2   5  115.99   12.10
   8   2  -5    0.70    3.50
   8   2  -5    7.40    6.50
   8   2  -5   -0.60    4.80
  -8  -2   5    1.90    5.80
  -8  -2   5    3.10    4.60
  -8  -2   5    0.40    4.50
   7   2  -5   14.50    4.30
   7   2  -5   33.20    7.40
   7   2  -5   41.10    9.00
   7   2  -5   32.60    7.80
  -7  -2   5   40.60    7.40
  -7  -2   5   38.80    8.80
  -7  -2   5   21.30    7.00
  -7  -2   5   31.00    6.30
   6   2  -5  249.97   13.00
   6   2  -5  262.57   16.10
   6   2  -5  260.97   17.60
   6   2  -5  261.57   16.30
  -6  -2   5  238.38   14.30
  -6  -2   5  271.47   16.60
  -6  -2   5  240.18   15.80
  -6  -2   5  286.57   14.40
   5   2  -5   18.30    5.80
   5   2  -5   15.90    4.90
   5   2  -5   26.80    6.10
   5   2  -5   23.20    4.60
  -5  -2   5   12.40    4.80
  -5  -2   5   17.20    5.20
  -5  -2   5   20.90    4.60
  -5  -2   5   18.10    5.00
   4   2  -5 1150.88   44.50
   4   2  -5 1125.89   41.20
   4   2  -5 1105.59   43.80
   4   2  -5 1054.19   44.60
   4   2  -5 1071.99   45.00
  -4  -2   5 1106.39   40.90
  -4  -2   5 1105.79   43.70
  -4  -2   5 1093.19   44.90
  -4  -2   5 1155.28   44.20
  -4  -2   5 1080.29   43.70
  -4  -2   5 1100.59   42.20
   3   2  -5 3736.33  131.09
   3   2  -5 3597.04  131.39
   3   2  -5 3749.02  131.69
   3   2  -5 3701.03  132.49
   3   2  -5 3630.64  128.79
  -3  -2   5 3587.64  131.89
  -3  -2   5 3609.24  130.69
  -3  -2   5 3599.74  129.39
  -3  -2   5 3760.12  128.59
   2   2  -5  228.48   11.50
   2   2  -5  261.97   12.90
   2   2  -5  263.17   12.90
   2   2  -5  237.78   13.40
   2   2  -5  231.08   10.40
   2   2  -5  244.08   12.20
  -2  -2   5  226.78   10.40
  -2  -2   5  243.98   12.00
  -2  -2   5  235.68   10.10
  -2  -2   5  205.38   12.40
  -2  -2   5  238.68   10.80
  -2  -2   5  253.37   11.80
   1   2  -5    4.50    3.10
   1   2  -5    4.00    1.70
   1   2  -5    1.60    2.40
   1   2  -5    3.10    2.20
   1   2  -5    4.00    2.20
   1   2  -5    4.70    2.50
  -1  -2   5    2.10    2.60
  -1  -2   5    3.90    2.40
  -1  -2   5    2.60    1.90
   0   2  -5   42.90    4.10
   0   2  -5   46.10    4.60
   0   2  -5   56.39    5.70
   0   2  -5   44.00    3.50
   0   2  -5   44.30    4.30
   0   2  -5   55.59    4.90
   0  -2   5   47.60    4.00
   0  -2   5   47.40    4.80
   0  -2   5   47.20    4.30
  -1   2  -5  131.29    6.50
  -1   2  -5  131.99    7.50
  -1   2  -5  130.29    8.10
  -1   2  -5  139.69    7.60
   1  -2   5  130.49    7.00
   1  -2   5  119.79    7.10
   1  -2   5  129.59    6.10
   1  -2   5  140.49    7.40
  -2   2  -5  321.57   15.30
  -2   2  -5  329.87   13.60
  -2   2  -5  347.57   16.00
  -2   2  -5  350.06   15.20
  -2   2  -5  346.97   15.10
   2  -2   5  351.26   14.60
   2  -2   5  339.67   14.30
  -3   2  -5  507.15   21.90
  -3   2  -5  536.55   22.90
  -3   2  -5  512.45   22.30
  -3   2  -5  499.65   22.00
  -3   2  -5  549.95   20.30
   3  -2   5  524.05   21.30
   3  -2   5  520.55   21.00
  -4   2  -5   66.29    7.40
  -4   2  -5   55.29    5.20
  -4   2  -5   61.89    6.80
  -4   2  -5   61.59    7.20
  -4   2  -5   53.69    6.70
   4  -2   5   58.09    5.80
   4  -2   5   69.19    7.10
  -5   2  -5  126.79    9.90
  -5   2  -5  120.49    9.60
  -5   2  -5  118.69   10.20
  -5   2  -5  120.59    8.20
  -5   2  -5  132.59    9.80
  -5   2  -5  131.79   10.30
   5  -2   5  124.79    8.70
   5  -2   5  133.99   10.20
  -6   2  -5  801.92   33.40
  -6   2  -5  835.52   36.00
  -6   2  -5  840.72   35.60
  -6   2  -5  887.31   36.30
  -6   2  -5  849.41   35.90
   6  -2   5  828.22   34.30
   6  -2   5  855.91   36.70
  -7   2  -5  368.26   21.60
  -7   2  -5  414.66   19.70
  -7   2  -5  424.16   22.30
  -7   2  -5  405.06   21.40
  -7   2  -5  394.86   21.90
   7  -2   5  406.36   19.90
   7  -2   5  389.36   21.80
  -8   2  -5   88.29   12.40
  -8   2  -5   81.69   11.90
  -8   2  -5   94.39   11.80
  -8   2  -5   80.69    9.70
   8  -2   5   92.79   11.20
  -9   2  -5   64.89   12.70
  -9   2  -5   67.79   13.10
  -9   2  -5   51.79   10.00
  -9   2  -5   74.69   12.30
   9  -2   5   64.59   11.00
 -10   2  -5   78.49   14.60
 -10   2  -5   86.49   15.10
 -10   2  -5   80.79   11.80
 -10   2  -5   71.99   13.70
  10  -2   5   85.79   12.90
 -11   2  -5   13.40    9.60
 -11   2  -5    6.40    8.90
 -11   2  -5    4.90    6.90
 -11   2  -5    3.00    8.70
  11   1  -5   11.00    7.30
 -11  -1   5   22.80    8.50
 -11  -1   5    5.90    7.00
  10   1  -5   79.59    9.10
  10   1  -5   69.09   12.40
 -10  -1   5   88.29   12.30
 -10  -1   5   86.89   12.10
 -10  -1   5   66.99   14.30
   9   1  -5  416.86   24.70
   9   1  -5  375.96   18.90
  -9  -1   5  356.86   21.70
  -9  -1   5  422.16   25.60
  -9  -1   5  396.16   22.00
   8   1  -5   24.90    7.60
   8   1  -5   17.30    6.70
   8   1  -5   19.60    5.00
  -8  -1   5   17.90    7.30
  -8  -1   5   24.20    6.80
  -8  -1   5   16.80    6.00
  -8  -1   5   18.30    7.00
   7   1  -5  231.18   12.10
   7   1  -5  201.18   15.30
   7   1  -5  198.48   16.10
  -7  -1   5  201.28   15.30
  -7  -1   5  201.88   15.80
  -7  -1   5  228.78   14.10
  -7  -1   5  202.88   13.90
   6   1  -5  951.50   40.80
   6   1  -5 1033.10   37.90
   6   1  -5  931.61   41.80
   6   1  -5 1025.20   42.90
  -6  -1   5  963.00   42.00
  -6  -1   5  964.40   42.80
  -6  -1   5 1001.30   39.70
  -6  -1   5  948.41   41.30
  -6  -1   5  982.90   39.90
   5   1  -5 1897.31   72.49
   5   1  -5 1888.41   74.09
   5   1  -5 1936.81   73.59
   5   1  -5 1939.81   69.69
  -5  -1   5 1977.30   71.59
  -5  -1   5 1882.41   73.19
  -5  -1   5 2033.70   73.19
  -5  -1   5 1764.62   73.69
  -5  -1   5 1960.60   73.39
   4   1  -5 3814.02  135.49
   4   1  -5 3772.02  134.69
   4   1  -5 3577.94  134.39
   4   1  -5 3745.03  133.69
   4   1  -5 3606.04  131.09
  -4  -1   5 3842.42  132.79
  -4  -1   5 3542.05  134.89
  -4  -1   5 3759.72  134.09
  -4  -1   5 3797.92  134.49
  -4  -1   5 3757.52  134.29
   3   1  -5  139.59    9.20
   3   1  -5  136.19    9.90
   3   1  -5  151.68    7.70
   3   1  -5  133.79    9.50
   3   1  -5  131.29   10.30
  -3  -1   5  144.59    9.70
  -3  -1   5  150.68    8.70
  -3  -1   5  148.19    9.50
  -3  -1   5  144.29   10.30
  -3  -1   5  141.69    7.40
   2   1  -5 1422.36   53.09
   2   1  -5 1477.65   53.89
   2   1  -5 1385.26   51.69
   2   1  -5 1415.36   50.79
   2   1  -5 1313.77   52.69
   2   1  -5 1399.16   52.49
   2   1  -5 1441.06   50.29
  -2  -1   5 1397.86   51.49
  -2  -1   5 1453.05   52.59
  -2  -1   5 1345.57   53.19
  -2  -1   5 1502.05   52.69
  -2  -1   5 1385.16   50.49
   1   1  -5   90.29    5.90
   1   1  -5   88.99    6.50
   1   1  -5   87.69    6.30
   1   1  -5   76.99    7.10
  -1  -1   5   80.69    4.60
  -1  -1   5   74.19    5.60
  -1  -1   5   84.69    5.50
  -1  -1   5   78.49    6.60
  -1  -1   5   86.39    6.10
  -1  -1   5   80.59    5.40
[truncated: 846,039 more chars]
